# Supplementary material for: Non-target Site Herbicide Resistance Is Conferred by Two Distinct Mechanisms in Black-Grass (Alopecurus myosuroides)
Source: Front Plant Sci. 2021 Mar 3;12:636652. doi: 10.3389/fpls.2021.636652 (PMC7966817; doi:10.3389/fpls.2021.636652)
Supplement: Supplementary file 2 [file Data_Sheet_2.xlsx]

## Sheet: Table S1
Table S1. Specific primers used for quantitative real-time PCR.
Gene	Sequence (5´→3´)
AmUBQ-Forward	GCAAGAAGAAGACCTACACCAAG
AmUBQ-Reverse	CCTTCTGGTTGTAGACGTAGGTG
AmGSTF1-Forward	AGTACGAGGTGGTGAACATCG
AmGSTF1-Reverse	CCAGGTTGCTCTCCCTCAG

## Sheet: Table S2
Table S2. Trinity assembly stats.
Counts of transcripts, etc.
Total trinity 'genes'	Total trinity transcripts	Percent GC
299782	579893	48.63
Trinity assembly stats
Stats	based on all transcripts contigs	based on only LONGEST ISOFORM per 'GENE'
Contig N10	4323	3819
Contig N20	3219	2653
Contig N30	2520	1919
Contig N40	2002	1349
Contig N50	1567	943
Median contig length	513	383
Average contig	919.08	664.5
Total assembled bases	532967705	199206416

## Sheet: Table S3
Table S3. Transdecoder assembly stats and salmon mapping rates and annotations. Rothamsted corresponding with the HS population, Fenoxaprop corresponding to the NTSR3 (derived from HS and selected for resistance to fenoxaprop-P-ethyl) and Pendimethalin corresponding to the NTSR2 (derived from HS and selected for resistance to fenoxaprop-P-ethyl).
Transdecoder assembly stats transcripts with CDS
Total	199761
L50	45332
N20	2109
N50	1113
N80	510
E-size	1437
min	255
max	15231
sum	167477826
Salmon mapping rates
Rothamsted-1	0.721458
Rothamsted-2	0.739904
Rothamsted-3	0.745946
Rothamsted-4	0.761004
Rothamsted-5	0.7124
Pendimethalin-1	0.760004
Pendimethalin-2	0.770783
Pendimethalin-3	0.77828
Pendimethalin-4	0.748822
Pendimethalin-5	0.7452
Fenoxaprop-1	0.762702
Fenoxaprop-2	0.756145
Fenoxaprop-3	0.76941
Fenoxaprop-4	0.768025
Fenoxaprop-5	0.764355
AHRD annotations of transdecoder transcripts
Total	199761
Blast results higher than 60% and a score of the assigned HRD higher than 0.5	91651 (46%)
Blast results higher than 50% and a score of the assigned HRD higher than 0.5	61189 (30%)
Interpro annotations of transdecoder transcripts
Total	123006
Gene ontology annotations of transdecoder transcripts
Total	68697

## Sheet: Table S4
Table S4. Xenome proteins with all the ORF sequences identified as differentially expressed in NTSR3 (derived from HS and selected for resistance to fenoxaprop-P-ethyl) and NTSR2 (derived from HS and selected for resistance to pendimethalin).
ID	Name	Details	Sequence_Prot
TRINITY_DN17894_c0_g1_i16.p1	ABCC -DN17894	type:complete_len:112_(+),score=12.23_TRINITY_DN17894_c0_g1_i16:2645-2980(+)	mdinlsgvqkqrvqiaralyqdadiyllddpfsavdahagsdlfkvyigvdlfllflkvllffkmppfvlqyyilsalatktviyaayqvefppvanlilvihfflslntl*
TRINITY_DN19119_c1_g1_i1.p1	ABCC -DN19119	type:5prime_partial_len:312_(+),score=40.13_TRINITY_DN19119_c1_g1_i1:1-936(+)	nadiyllddpfsavdahtaislfneyvmsalsdktvllvthqvdflpvfdsillmsdgevlrsapyqnlledceefkelinahkdtigvsylnsnippkrskeisvketygihggsyieflkpspvdqlikkeeretgdagfkpymlylrqnkgflyasfcvishlifiagqisqnswmaanvqnphvstlelisvyiiigfctmlfllsrslssvilgietsrslfrqllsslfrapmsffdstplgrilsrvssdlnivdldvpfsfmfglsaslnaysnlgvlavvtweallvsvpmivlairlqvic*
TRINITY_DN26616_c0_g1_i4.p1	ABCC -DN26616	type:3prime_partial_len:230_(+),score=33.23_TRINITY_DN26616_c0_g1_i4:369-1055(+)	mdilseaaevveenrlavdwpqqgnveltnlkiryredaplvlhgitcrfkggdkigivgrtgsgkttligalfrlvepaegkiiidsvdistiglhdlrsclgiipqdpilfqgtirynldplgkfsdqqirevldkcqlleavqereqgldshvvedgsnwsmgqrqllclgrtllrrcrilvldeatasidnatdaalqktirtefkyctvitvahriptvmdcdm
TRINITY_DN26616_c0_g1_i9.p1	ABCC -DN26616	type:internal_len:209_(+),score=34.00_TRINITY_DN26616_c0_g1_i9:3-626(+)	qvgsvevkdlkiryrndaplvlhgitckfegrdkigivgrmgsgkttligalfrlvepaggkiiidyvditmiglhdlrsrlgiipqdptlfqgsvrynmdplgkfsdqqirevldkcqlleavqereqgldshvvedgsnwsmgqrqllclgrtllrrcrilvldeatasidnatdaalqktirtefkyctvitvahriptvmdcdm
TRINITY_DN26616_c0_g1_i7.p1	ABCC -DN26616	type:internal_len:378_(+),score=61.95_TRINITY_DN26616_c0_g1_i7:2-1132(+)	pmivlairlqryylasakelmringttksalanhlgesisgaitirafeeedrffaksldlldknagsyfynfaatewliqrleimgaavlsfsaffmallpqgtfspgfvgmalsyglslnmafvfsiknqcklanqiisvervnqymdilseaaevveenrlavdwpqqgnveltnlkiryredaplvlhgitcrfkggdkigivgrtgsgkttligalfrlvepaegkiiidsvdistiglhdlrsclgiipqdpilfqgtirynldplgkfsdqqirevldkcqlleavqereqgldshvvedgsnwsmgqrqllclgrtllrrcrilvldeatasidnatdaalqktirtefkyctvitvahriptvmdcdm
TRINITY_DN26616_c0_g1_i2.p1	ABCC -DN26616	type:5prime_partial_len:290_(+),score=45.59_TRINITY_DN26616_c0_g1_i2:2-871(+)	pmivlairlqryylasakelmringttksalanhlgesisgaitirafeeedrffaksldlldknagsyfynfaatewliqrleimgaavlsfsaffmallpqgtfspgfvgmalsyglslnmafvfsiknqcklanqiisvervnqymdilseaaevveenrlavdwpqqgnveltnlkiryredaplvlhgitcrfkggdkigivgrtgsgkttligalfrlvepaegkiiidsvdistiglhdlrsclgiipqdpilfqgtirynldplgkfsdqqirevrytkls*
TRINITY_DN26616_c0_g1_i10.p1	ABCC -DN26616	type:5prime_partial_len:121_(+),score=14.26_TRINITY_DN26616_c0_g1_i10:3-365(+)	qvgsvevkdlkiryrndaplvlhgitckfegrdkigivgrmgsgkttligalfrlvepaggkiiidyvditmiglhdlrsclgiipqdpilfqgtirynldplgkfsdqqirevrytkls*
RINITY_DN21431_c0_g1_i1.p1	ABCC-DN21431	type:internal/len:122/(+),score=23.82/TRINITY_DN21431_c0_g1_i1:2-364(+)	stdqsevdtsiadqmgsvafsiiqlvgivavmsqvawqvfvifvpltvacfwyqryyidtarelqrlvgvckapiiqhfsesitgsaiirsfgkenqfvstnshlmdafsrpkfynaaare
TRINITY_DN99687_c0_g1_i1.p1	ABCD1 -DN99687	type:5prime_partial_len:154_(+),score=19.56_TRINITY_DN99687_c0_g1_i1:2-463(+)	tslgtlrdqviyplsreeaemkilslhkasnrssapellddhlktvlvnvrlvylleregwdstpnwedvlslgeqqrlgmarlffhhpkfgildectnatsvdveehlyrlatnmgitvitssqrpalipfhsvelklidgegnwelceieh*
TRINITY_DN11597_c0_g1_i3.p1	ABCG -DN11597	type:complete_len:769_(+),score=129.86_TRINITY_DN11597_c0_g1_i3:96-2402(+)	mcadvmvgddmrtgisggqkkrlttgemlvgptkvlfmdeistgldssttfqvvrciqqivhlgeatvlvsllqpapeifdlfddvmllsegqvvyqgprehvleffercgfrcperkgaadflqevtskkdqeqywirndkpyryvsvpefvakfkkfhmgkslkkqlsvpfnktkihksalafsdqsvptlellktsfskewllmkrnsfiyvfkivqgiivalvastvflrtqlhqnneedgqvylgalifvmisnmfngfaeatltlarlpvfykhrdflfyrpwsftlpnvllkvpmslfesiiwvvityyligfapeasrffkhlitvfliqqsagglfrvvaglcrtvvmtntagslallimfvlggfilprdaipkwlvwgywcspmtyay…
TRINITY_DN17182_c0_g1_i1.p1	ABCG -DN17182	type:complete_len:261_(+),score=35.37_TRINITY_DN17182_c0_g1_i1:34-783(+)	mstmfytsadalpvflieryiflretahnayrrssytlsnaivafpplvflsvafaaitffavglaggaegfvffvlivlasfwagsgfvtflsgvvphviigytvvvavlayfllfsgffvtrdripdywiwfhylslikypyeavmqnefgadpgkcfmrgvqmfdgtpmgklpvntqvtvlnamsksmridfnstscittgmdilakqavdqlgkwgclwatvawgflfrilfyltlllgstnkrr*
TRINITY_DN34165_c0_g1_i4.p1	ABCG -DN34165	type:internal_len:267_(+),score=32.42_TRINITY_DN34165_c0_g1_i4:1-798(+)	aivmrtvrntvntgrtvvctihqpsidifesfdellsmkrggrvtyagklgrqsdilvkyfeavpgvpkitegynpatwmlevsspvaearlnvdfaeiyansalyrsnqdlikelsvqppgsqdisfptkysqnfvnqcmantskqfksywknppyntmrylmtllyafvfgtvfwqkgnniesqqdlytllgamyavvfflgvstvlsilpvvsiertvfyrekaagmysplsyafaqalvefvysaaqgviytvlfypmvgfe
TRINITY_DN34165_c0_g1_i1.p1	ABCG -DN34165	type:internal_len:144_(+),score=14.46_TRINITY_DN34165_c0_g1_i1:3-431(+)	fickkeviisdktikatltysvflqavpgvpeitegynpatwmlevssplaearlnvdfaeiyansalyrsnqdlikelsvqppgsqdisfptkysqnfvnqcmantskqfksywknppynsmrylmtllygfvfgtvfwqkg
TRINITY_DN34165_c0_g1_i3.p1	ABCG -DN34165	type:5prime_partial_len:205_(+),score=21.78_TRINITY_DN34165_c0_g1_i3:1-615(+)	aivmrtvrntvntgrtvvctihqpsidifesfdellsmkrggrvtyagklgrqsdilvkyfeavpgvpkitegynpatwmlevsspvaearlnvdfaeiyansalyrsnqdlikelsvqppgsqdisfptkysqnfvnqcmantskqfksywknppyntmrylmtllyafvfgtvfwqkgknlydptlysnfpqipfiylfhlq*
TRINITY_DN34165_c0_g1_i2.p1	ABCG -DN34165	type:internal_len:154_(+),score=17.35_TRINITY_DN34165_c0_g1_i2:3-461(+)	ifesfdelllmkrggrvtyagklgrqsdilvkyfeavpgvpkitegynpatwmlevssplaearlnvdfaeiyansalyrsnqdlikelsvqppgsqdisfptkysqnfvnqcmantskqfksywknppynsmrylmtllygfvfgtvfwqkg
TRINITY_DN55430_c0_g1_i1.p1	ABCG -DN55430	type:internal_len:359_(+),score=56.26_TRINITY_DN55430_c0_g1_i1:1-1074(+)	aevqmtikklpvfykqrdylffpawtfglaniilklpfslvdtsvftvvtyyvigyapasgrffgqllayfcthqmsvamfrllgailrtmavantfgmfvlllvflfggfvmprsdiksywvwgywispmmysnnalsineflasrwaipnvdrsidaltvgkaylksksyfsgewgywlcigamigfmvlfnilylcaltflssaggsnnvvsddtcekelkvesknleqmaqvthgaeesrnkrtetgmvlpfqplslsfnhvnyyvdmppemkaqgftenrlqllsdicgafkpgvltalvgvsgagkttlldvlagrktsgtiegdirlsgypkkqetfarisgyceqtdihs
TRINITY_DN55430_c0_g1_i4.p1	ABCG -DN55430	type:internal_len:162_(+),score=27.43_TRINITY_DN55430_c0_g1_i4:3-485(+)	wiwgywispmmysnnaislneflssrwaiptidgstvgkafiksrgyfagqwgywlsigamigfmvlfnilylcaltflnpavgsnnvvsddssekelkvesknqeqmaqvthgaeesrnkrtetgmvlpfqplslsfnhmnyyvdmpaemkaqgftedrl
TRINITY_DN57669_c0_g1_i1.p1	ABCG -DN57669	type:internal_len:211_(+),score=45.67_TRINITY_DN57669_c0_g1_i1:3-632(+)	qydlhngemtvretldfsrrclgtgnrydmlseltrrernagikpdpvidafmkataiqgkesnfitdltmkvlgldicadtivgdemkrgisggqkkrvttgemltgpsralfmdeistgldssstfqivkyirhmvhvmnytvmisllqpppetynlfddiillsegyivyhgprenileffervgfkcperkgvadflqevtsrkdq
TRINITY_DN35862_c0_g2_i1.p1	AmMDR-like ABC -DN35862	type:5prime_partial_len:409_(+),score=72.14_TRINITY_DN35862_c0_g2_i1:2-1228(+)	qtyaqtkflqgfnknakvkyeeasqiasdavggirtvasfcaeqkvmdayekkcesptrqgmregivgglgfgftflvfylayalcfyvgakfvqegtatfpqvfrvffvlvlasgaisrtsasgadsakanesaisifeildhkskidssrkegvviegargdiefqnvcfsyplrpnvqilndltlsipfgktaalvgesgsgkstaiallerfydpssgrilfdgvelralkvswlrlqiglvaqepvlfndtiraniaygkqgeaseeemvaaaeaanahrfisglpdgydtvvgergiqlsggqkqrvaiaravvkdpkvllldeatsaldaeservvqealdrvmvgrttvvvahrlstvkgadiicmvesgtivekgrhdelmrikdgayas…
TRINITY_DN17422_c0_g1_i2.p1	AmCYP704	type:complete_len:525_(+),score=83.25_TRINITY_DN17422_c0_g1_i2:46-1620(+)	matqlsslaasagicivsvfaiaflsitlyvlavvasfavfcirefvqraqdrppligtvlrqlknfdrifdehvsyallhrtsrliypghsefftsdpaviehvlktnfskyskgafiteimrdlfgdgifatdgekwrhqrkvashefstkvlrdfssdvfrmnaaklaekisyaaadsitinmqdllmrttmdsmfkvglgtdlntlsgsdestiqfsnafdeasslvyyrfvdlfwqvkrhlnigseaklkksiwiidnfvmkvihqkrqqmrnghdhktredilsrfilaseedpemmndrylrdivlsfliagkdttantlswffymlcknpvvqdkvayeikesvewaqednmetytarlnqgaidkmhylhatltetlrlypavpvdakta…
TRINITY_DN12797_c0_g1_i1.p1	AmCYP709J1	type:5prime_partial_len:524_(+),score=31.03_TRINITY_DN12797_c0_g1_i1:1-1572(+)	limnmkagyyalagvlavflvsralwrlvwrpytvargferqgirgppysllvgslleirrmlvarraeapldpgchdytslvipffhkwasdygktflywvgpvpaicstnmellkqvlddrtdlfqkdylnpsfdvifrkgllttngedwkrhhrvvhpifkhenlksvsamtmegtrkmieqwcaqiershvqqaeidmsccseeltlgviehaifgknydkeareafvagkelqklsvyalsdppisgyrylptrrhlrswkldrlitrkimqiinartaggvygddllgmmlkarrseaealsteeiigecktffaagedtsaslltwmmfllssyplwqeklreevlrecgdaptidvlgklkllnmfiletlrlysplpvftrltasdtila…
TRINITY_DN108589_c0_g1_i1.p1	AmCYP711 -DN108589	type:5prime_partial_len:392_(+),score=39.95_TRINITY_DN108589_c0_g1_i1:3-1178(+)	iylsiylsiylsiylviirgstwqsmrnviisiyqpshlaslipsthkyiqrsmrllcpgeditfsdfslklfsdiigqaafgvdfgltkddhqeaddfihkhlyavaslkmdlsgslsmilgtfmpmlqeplrqlllrvpgsvdrrmdetnmslsgkldgivaeraargdrghkdflsvllnaidnsdamrnlftpdhvtaltyeqllagagttsftlsslvylvsmhldveekllqeidafgpkdmvpdaedlrtkfpyldqvlketmrffagfpvttreatqdveiggyflpkgtwvwlgtgvlgkdprqfpepnvfrpgrfdpgseecrrrhpyayspfgigpracpgekfamqnlklavihlyhryifrhspsmesplqfqtfssp*
TRINITY_DN39146_c0_g1_i3.p1	AmCYP71AD1	type:complete_len:543_(+),score=87.02_TRINITY_DN39146_c0_g1_i3:235-1863(+)	mhndktcrdsvkestptiavtmelaalalllpfllaglvylgkhrgeggdsarrlppaprglpiignlhqvgalphralsalaaahgaphllrlrlgrvpalvasspaaaaelmrahdhafatrpyfrtaeilsygfrdlvfaphgehwrhvrrlcsehvlsaarshrqnamrerevatlvkavaaeassaaaaavdvsgalyrfandvicrvvcgrvsreaegrselfreliqentallggfcigdyfpalawadkllsgggarawrnlrrwddlleklvqehegrrsergcggddddgeeedfvdvllalqeegvqddgfeltrdivkslladmfaagtettyialewamseliknpttmrklqhevrsaaipaggiakadrlsaattpylkavvke…
TRINITY_DN1372_c0_g2_i1.p1	AmCYP71C1	type:3prime_partial_len:571_(+),score=69.71_TRINITY_DN1372_c0_g2_i1:121-1830(+)	matvvlhcqvipiflkyilwwiffifycifvnlhessllmtrktvrvahveayhlhhdqstvfasmaceganhgtsvqalfllfvvplallfiggkrwsrrrskerqrlrlppsppgklpvighlhlvgtlphvslrdlaqkhgqdlmllrlgavdtvvvssprvaeavlrtydhalasrarsavaniifyrasdvafapfgepwrqarkvvtthmlsaskvhsfrqyreeevriavakirataaaassagtataeavdmtehlgsymnhvvcgavlgrhhrddgrnkllrelieinisllggfnvedyfpclamsdvftgavlcrrakrvrkrwdelldklidehgrhreqkddagadfihvllslqeeyglttdnvkailldmfgagiettyvtlef…
TRINITY_DN121622_c0_g1_i1.p1	AmCYP71C2	type:complete_len:393_(+),score=51.62_TRINITY_DN121622_c0_g1_i1:40-1218(+)	mlstrkvqsfrkyreeevciavakiraaassagtataaavdmtehfgsymndvvcravlgshhrndgrnkllrelidinisllggfnvedyfpslamwdmftgmvlcpsakkvrkrwdellgklidehgrhrkqeddasegfihvllslqeeyglttdnvkailldmfgagiettystldfamaelmnnrhvmaklqvevrrgmrapapagskdgkelqqdmvteeelrdmaylratiketlrlhppatllmphlliaereiegyvihvgtrfmvnawalardpvswkepeeflperflpggsaagvdsngndfqyvpfgsgrricpginfantameimlanlvyhfdwelpaemkevdmkqvfglttrrkdklllvpapislheekgvqll*
TRINITY_DN3268_c0_g1_i4.p1	AmCYP71R1	type:internal_len:142_(+),score=16.20_TRINITY_DN3268_c0_g1_i4:3-425(+)	llisltntvisraafgnklggvdpriiedimneendllgtiavsdvfprlwwvdwvtgldarvkrtaakldgilertlaehersrgendgephdllddllsilkdgdqgfkldridvkalildtflagtdttyktiewtma
TRINITY_DN3268_c0_g1_i3.p1	AmCYP71R1	type:internal_len:156_(+),score=25.72_TRINITY_DN3268_c0_g1_i3:1-465(+)	iafspygerwrqlrriavvhllsakrvdsfralreeevaslveriraasgirgevvnvtellisltntvisraafgnklggvdpriiedimneendllgtiavsdvfprlwwvdwvtgldarvkrtaakldgilertlaehersrgendgephdl
TRINITY_DN3268_c0_g1_i1.p1	AmCYP71R1	type:internal_len:203_(+),score=31.00_TRINITY_DN3268_c0_g1_i1:1-606(+)	iafspygerwrqlrriavvhllsakrvdsfralreeevaslveriraasgtvreegvnvtqllisltntvisraafgnklggvdpriiedimneendllgtiavsdvfprlwwvdwvtgldarvkrtaakldgilertlaehersrgendgephdllddllsilkdgdqgfkldridvkalildtflagtdttyktiewtma
TRINITY_DN3268_c0_g1_i5.p1	AmCYP71R1	type:internal_len:157_(+),score=24.56_TRINITY_DN3268_c0_g1_i5:1-468(+)	iafspygerwrqlrriavvhllsakrvdsfralreeevasfverirtasstvreesvnvtellisltntvisraafgnklggvdpriiedimneendllgtiavsdvfprlwwvdwvtgldarvkrtaakldgilertlaehersrgendgephdl
TRINITY_DN3268_c0_g1_i2.p1	AmCYP71R1	type:internal_len:142_(+),score=17.44_TRINITY_DN3268_c0_g1_i2:3-425(+)	llisltntvisraafgnklggvdpriiedimneendllgtiavsdvfprlwwvdwvtgldarvkrtaakldgilestlaehersrgendgephdllddllsiledgdqgfkldridvkalildtflagtdttyktiewtma
TRINITY_DN29732_c0_g2_i1.p1	AmCYP71R2	type:complete_len:197_(+),score=25.46_TRINITY_DN29732_c0_g2_i1:53-592(+)	mvdvllqfasdpnlevklnregvkaftqdliaggtessavtlewalsellkkpevlaketeeldrvvgrgrwvtekdipsipyieaivketmrlhpvapmlaprlsredasidgydipagtrvlvsvwsigrdpelwdapnefmpeqfvgskldvkgqdyellpfgsgrrmcpgyslgl*
TRINITY_DN51032_c0_g1_i1.p1	AmCYP71T1	type:complete_len:394_(+),score=61.47_TRINITY_DN51032_c0_g1_i1:1-1182(+)	mvdrfyygtggigfapygehwrqarrvcvthmlnprrivsfgrvrgqevralvervrsagavvnlsdnliifsntvisrvmfgdtdyrmdgdeggarlrkvfaeieellgtvamqekvpwlwwvdvvtglerktrsafeamdtllerviadhrnrrgtgeedcrdfvdvllnnaddldmggikaiildmlaaatdstftllewamaelinnaekmrrlqdeiraavgaagtvtedhlpdlrylkavvketlrlhpptplllpretledtqllgyhvpagtrvlihawaigrdpaawgdraeeflperfldyhhemgqdfrflpfgagrrgcpgvkfamlsnelalaslvyhfdwevaderkppvdmtelhglsvrlktalllvakpwsgcave*
TRINITY_DN14699_c0_g1_i2.p1	AmCYP71Y1	type:complete_len:318_(+),score=14.82_TRINITY_DN14699_c0_g1_i2:95-1048(+)	medtaslshyysvylgwalvslavglvayrrcvigangclrlppgpwqlpvigslhhligqlphhalhdlaqrhgpvmlvrlgevptlvmsspdaarevmkthdvafatrpinaimrvvtcggqnigfapygeywrqlrkiavtelltarrvhsfhvireeevasmlrdvesaaaaarpvemrarlsevssattfraimgdrcnqrdlflreldtliglatgfnpvdlwpsswlarrlsgtlrrakenrnavseiirgiiqehlgrtkcegetedlldvllkihkdggvdmvavegiifvshllgkksqsissrltc*
TRINITY_DN60121_c0_g1_i1.p1	AmCYP72	type:internal_len:126_(+),score=6.75_TRINITY_DN60121_c0_g1_i1:1-375(+)	rareevrhvlgastpeydglnrlkivtmvlyevlrlytpipmlqrktykpmelggvryptgvvltvpllcvhhdkelwgedadefrperfaqgiskasvdapaffpfgwgprvcigqnfalleak
TRINITY_DN11130_c1_g1_i1.p1	AmCYP72A1	type:internal_len:417_(+),score=56.35_TRINITY_DN11130_c1_g1_i1:2-1249(+)	rstrscrttvfqfqpffsnffaaamsfatlvspatspwsfliwgvpgllllwqaawlldrlwwrprrleralraqglrgrpyrflvgnvmddylwknkeasmplrchdigpfvapsihsavrehgrtciswfgpipkvtiadaeltrqvmssksghfeklqfpklsrllaegvatyeaekwvkhrrilnpafhleklklmlpafsscceelvtrwrteslgsagcyevdlcpefhslagdaisrtafgssflegkrifelqseqadrilasvkmifipgylslptrnnrrmhqinneiesilqgligkrmqamrqgestkddllslmlqsnmretdgngqsvtgmtikevieeckmfyfagtettsilltwamlllsmhpewqdrareevlglfgknqp…
TRINITY_DN11130_c1_g1_i2.p1	AmCYP72A1	type:5prime_partial_len:563_(+),score=69.99_TRINITY_DN11130_c1_g1_i2:3-1691(+)	tntvtaechihpvqgplavaespssslsspiwfaaamsfaslvspatspwsfliwgvpgllllwqaawlldrlwwrprrleralraqglrgrpyrflvgnvmddylwknkeasmplrchdigpfvapsihsavrehgrtciswfgpipkvtiadaeltrqvmssksghfeklqfpklsrllaegvatyeaekwvkhrrilnpafhleklklmlpafsscceelvtrwteslgsegcreldlcpefhslagdaisrtafgssflegkrifelqseqadrilasvkmifipgylslptrnnrrmhqinneiesilqgligkrmqamrqgestkddllslmlqsnmretdgngqsvtgmtikevieeckmfyfagtettsilltwamlllsmhpewqdrare…
TRINITY_DN11130_c1_g1_i3.p1	AmCYP72A1	type:5prime_partial_len:563_(+),score=71.85_TRINITY_DN11130_c1_g1_i3:3-1691(+)	tntvtaechihpvqgplavaespssslsspiwfaaamsfaslvspatspwsfliwgvpgllllwqaawlldrlwwrprrleralraqglrgrpyrflvgnvmddylwknkeasmplrchdigpfvapsihsavrehgrtciswfgpipkvtiadaeltrqvmssksghfeklqfpklsrllaegvatyeaekwvkhrrilnpafhleklklmlpafsscceelvtrwteslgsegcreldlcpefhslagdaisrtafgssflegkrifelqseqadrilasvkmifipgylslptrnnrrmhqinneiesilqgligkrmqamrqgestkddllslmlqsnmretdgngqsvtgmtikevieeckmfyfagtettsilltwamlllsmhpewqdrare…
TRINITY_DN20105_c0_g1_i1.p1	AmCYP72A2	type:5prime_partial_len:387_(+),score=55.31_TRINITY_DN20105_c0_g1_i1:3-1163(+)	altkllangltthegekwvkhrrilnpafhleklklmlpafsasceelvsrwkefhgsddscevdvwpelqnltgdvisrtafgssylegrrifqiqseqaklfvgaikrivipgylflptknnrkmrknnnevesilrgiigkrmqameegkssqedllglllesnrrdidengqpskgmtmedvieecklfylagmettsvlltwtmivlsmhpewqdlareevlglfgrnkpqyeglsqlkivtmilhevlrlypsatvfsrktykdmdiggvrfppgvfievpvlfinhdpdiwgsdvnefkperfgqgiskaskhpgaflsfgwgprvcigqnfalleakmaltmilqhfefelassyihaphtvmtlqpmhgaqiklrai*
TRINITY_DN20105_c0_g1_i2.p1	AmCYP72A2	type:complete_len:140_(+),score=17.50_TRINITY_DN20105_c0_g1_i2:141-560(+)	milhevlrlypsatvfsrktykdmdiggvrfppgvfievpvlfinhdpdiwgsdvnefkperfgqgiskaskhpgaflsfgwgprvcigqnfalleakmaltmilqhfefelassyihaphtvmtlqpmhgaqiklrai*
TRINITY_DN2964_c0_g1_i3.p1	AmCYP73	type:complete_len:546_(+),score=73.08_TRINITY_DN2964_c0_g1_i3:106-1638(+)	mgvlaallllafllaalayvlrlvhsllwvphllerrlrrqgirgpprslisgngadysalhaaaestplasfhhtvvgrvapqyrewparygrpfvfwfgprprlvvygpevaktvltdstgtfdkagsggsgnpqarqligeglvglsgetwahhrrvispafnmervkgwipeissiissmldkwevqgethtefeidvskefhtlsaevissvafgssyeegkrvfqlqeeqiklallamrtfyfpgfrfvptkknrrrhnlnqeirsslrklieinarkcedsknllglmlsasktnkelkmgieeiidecktfyfagkettanlltwatlllalhkewqdkardevyqvcgkyehpsadnlsglkivnmvlketlrlyppavfvnrtatrdvk…
TRINITY_DN2964_c0_g1_i12.p1	AmCYP73	type:complete_len:546_(+),score=80.63_TRINITY_DN2964_c0_g1_i12:106-1638(+)	mgvlaallllafllaalayvlrlvhsllwvphllerrlrrqgirgpprslisgngadysalhaaaestplasfhhtvvgrvapqyrewparygrpfvfwfgprprlvvygpevaktvltdstgtfdkagsggsgnpqarqligeglvglsgetwahhrrvispafnmervkgwipeissiissmldkwevqgethtefeidvskefhtlsaevissvafgssyeegkrvfqlqeeqiklallamrtfyfpgfrfvptkknrrrhnlnqeirsslrklieinarkcedsknllglmlsasktnkelkmgieeiidecktfyfagkettanlltwatlllalhkewqdkardevyqvcgkyehpsadnlsglkivnmvlketlrlyppavfvnrtatrdvk…
TRINITY_DN34608_c0_g1_i6.p1	AmCYP76	type:complete_len:507_(+),score=84.38_TRINITY_DN34608_c0_g1_i6:274-1794(+)	measstilwilcislatfvlyrfflsgksrpqggpgnnsrlppgpapvpllgnvfslqgelhhalarlaavhgpvfslklgattavvassagsardvlqrhdsilsarsvtdaaralgnhersfiwlpptsalwrrlralsathlfsahgldatravreaktrelveflrghageavhvgrvvrsgmlnlvsnvllsedvadlssdagrmqeletmigdileeltkpnlsdlfpalasldlqgrrrrtaerltrffdffepiidrrlkaggerkedfldvllqlhsadqlsiqtiksflldlfvagtdtnsltvewtmaellrhpaimskvraelqqvlgskqhpeesdvgslsylrtvvletmrhhppspllmpreamadgaevggfavprgamvivn…
TRINITY_DN79867_c0_g1_i1.p1	AmCYP81 -DN79867	type:internal_len:153_(+),score=14.39_TRINITY_DN79867_c0_g1_i1:3-458(+)	hhsyisfrrteafflhpniyscnfsifytskfvklmyfhhpekkiyscclvfqfynlkkkswkwsyhkprkttdltlklffpvqnlfgagtettstmtewamslllnhptvikkaqaeidasvgnsrlvaaddvphlaylqciisetlrlcp
TRINITY_DN7830_c0_g2_i2.p1	AmCYP81A1	type:internal_len:198_(+),score=26.77_TRINITY_DN7830_c0_g2_i2:1-591(+)	pvdiattmmmdkayiaifffftfvfllrqilrgktsngdnnrgvqlppsppaipflghlhlvakkplhatlrgladhygpifslrlgarnavvvssaacatecftehdvifanrpqfpsqqlvsfggtslifssygprwrtlrrvaavqllsphrvacmsgviaseiramtrrlcraaaagarvhlkrrlfelslsv
TRINITY_DN7830_c0_g2_i1.p1	AmCYP81A1	type:internal_len:195_(+),score=24.67_TRINITY_DN7830_c0_g2_i1:2-583(+)	niattmmdkayiaifffftfvfllrqilrgktsngdnnrgvqlppsppaipflghlhlvakkplhatlrrladrygpvfslrlgarnavvvtsaacatecftehdvifanrpqfpsqqlvsfggtslifssygprwrtlrrvaavqllsphrvacmsgviaseiramtrrlcraaaagarvhlkrrlfelslsv
TRINITY_DN29074_c0_g1_i1.p1	AmCYP81A3	type:3prime_partial_len:199_(+),score=17.20_TRINITY_DN29074_c0_g1_i1:47-640(+)	miavlltlqktepevytdtmitalcanlfaagtettstmtewamtlllnhpavikkaqaeidgsvgnsrlvaaddlprlaylqciisealrlyppaplllphessadckvggynvprdtmlivsayaihrdpaiwgdptvfrperfedgkgegllvipfgmgrrgcpgetlarqmvgmvlgtmlqcfdweredgmevd
TRINITY_DN6864_c0_g1_i7.p1	AmCYP81A4	type:complete_len:518_(+),score=92.28_TRINITY_DN6864_c0_g1_i7:269-1822(+)	mdkpyiavlsfallfllhyvvgkvsngrrgtkgavqlppsprafpflghlyvlekpfhaslcrvaarlgpvfslrlgsrravvvcsseaarecftehdvtfadrprfpsqllvsfngaalatssygphwrnlrhvadvqllsahhvacmsgviaaeiramvrrlchtaaatpggaprvqlkrrlfelslsvlmetiantkgtrpvadadtdmsmeaqefkkvmdeiipyigsanmwdylpvmrwfdvfgvrnkilavvsrrdaflrrlidaerqrledgggqgdkksmiavlltlqktepevytdtmitslcanlfgagtettstmtewamslllnhpavikkaqaeidasvgnsrlvaaddvprlaylqciisetlrlcppaplllahessadckvgg…
TRINITY_DN17827_c0_g1_i3.p1	AmCYP86-1	type:5prime_partial_len:525_(+),score=37.13_TRINITY_DN17827_c0_g1_i3:1-1575(+)	ciskkqhihlllirmlisvsqemlliptlvvlvslclyfksnrsknpaelptgwpilyrfpslmvnlhnihgyltvvlagsghnfrahgppgtgmrffitcdpanvrqifttnytnypkgaqfadifdimggslfttdgetahrmhvnapkffssrwsvarvaahcrdkvehgvlpflaqmaststpfdmqklmgrcmldlitqtvfrvdpgllspnmnmrsmdvseamdtvmevgflrniipiscwkamrrlnigperklnaahgvlrrfnqeikesrkinvghevnvvdmysaclddplyddhevlhatligsllagrdtvsttlswifynlaqnpdtvsairkelspiasckmaggttdamvifepeetktlvylraalyetlrlyppgpierktv…
TRINITY_DN17827_c0_g1_i2.p1	AmCYP86-1	type:5prime_partial_len:287_(+),score=18.21_TRINITY_DN17827_c0_g1_i2:1-861(+)	ciskkqhihlllirmlisvsqemlliptlvvlvslclyfksnrsknpaelptgwpilyrfpslmvnlhnihgyltvvlagsghnfrahgppgtgmrffitcdpanvrqifttnytnypkgaqfadifdimggslfttdgetahrmhvnapkffssrwsvarvaahcrdkvehgvlpflaqmaststpfdmqklmgrcmldlitqtvfrvdpgllspnmnmrsmdvseamdtvmevgflrniipiscwkamrrlnigperklnaahgvlrrfnqemkesrkinvgrt*
TRINITY_DN18890_c2_g1_i3.p2	AmCYP86-2	type:3prime_partial_len:116_(+),score=13.27_TRINITY_DN18890_c2_g1_i3:35-379(+)	mlhwchsifsklamdsiywlvellsllccfvfyyrhlqskkiskaeptewpilghlfglianmhhfhdwatavlagtynfqaragltgvryfvtcdpsnvrhifssnflnypkgd
TRINITY_DN18890_c2_g1_i2.p1	AmCYP86-2	type:3prime_partial_len:113_(+),score=6.99_TRINITY_DN18890_c2_g1_i2:35-370(+)	mlhwchsifsklamdsiywlvellsllccfvfyyrhlqskkiskaeptewpilghlfglianmhhfhdwatavlagtynfearagltgvrffvtcdpsnvrhiftsnfvnyp
TRINITY_DN18890_c2_g1_i1.p2	AmCYP86-2	type:3prime_partial_len:116_(+),score=12.00_TRINITY_DN18890_c2_g1_i1:35-379(+)	mlhwchsifsklamdsiywlvellsllccfilyyrhlqskkiskaeptewpilghlfglianmhhfhdwatavlagtynfearagltgvrffvtcdpsnvrhifssnflnypkgd
TRINITY_DN68452_c0_g1_i1.p1	AmCYP89-1	type:5prime_partial_len:413_(+),score=53.24_TRINITY_DN68452_c0_g1_i1:2-1240(+)	lnrpvgvtpssiltgdrhyniisapygpywravrrnvtagvlhpsslgkladtrarvltrllgdlrsgapaaetlyfsvysllaemcfgeevvseigearlramhklqrhmlsvlpsfgvlvrypriskllypsrwrqvlalrrqqdlyflplvaevnkkknnrkggpgfntptyvdsllelqipedggsraltdselvsliseflgagtettastlqwtmanlmkrpdlqqklrlevdavacnqgiieeaelsqmpylkatvleslrrhpplpfvlrhmgrevatkvlgmtsvpdrgatvnflvgkigrdaatwsdptefkperfmdgknadltctrelrmmpfgagrracpaiapamlhleyfvanlvkefewceadgdnnavdltefhgffvtimn…
TRINITY_DN60619_c0_g1_i3.p1	AmCYP89-2	type:3prime_partial_len:219_(+),score=33.56_TRINITY_DN60619_c0_g1_i3:39-656(+)	metfqyamfcllvlmcfgerlnesavraiaaaqrnqllyvtrkmavfaffpsltkrlfrgrlrtahalrqrqkdlfvplinarreyksrggelkkettfehsyvdtlldiklpeegnrkltddemvglcseflnagtdttstglqwimaelvknpaiqeklykeistttgdeqeevseedvqkmpylkavvleglrkhppghfvlp
TRINITY_DN60619_c0_g1_i2.p1	AmCYP89-2	type:internal_len:262_(+),score=46.85_TRINITY_DN60619_c0_g1_i2:2-784(+)	titrasygplwrllrrnlvaetlhpsrvrlfaparswvrrvlvqklressesggatvvetfqyamfcllvlmcfgerldepavraaaqrdhllyvnrklavfaffpsltkrlfrgrlrtahamrqrqkelfvplfnarrkyksrggelkkettfehsyvdtlldiklpeegnrkltddemvglcseflnagtdttstglqwimaelvknpaiqeklykeistttgdeqeevseedvqkmpylkavvleglrkhppghfvlp
TRINITY_DN60619_c0_g1_i1.p1	AmCYP89-2	type:3prime_partial_len:159_(+),score=26.89_TRINITY_DN60619_c0_g1_i1:39-476(+)	metfqyamfcllvlmcfgerlnesavraiaaaqrnqllyvtrkmavfaffpsltkrlfrgrlrtahalrqrqkdifvplidarreyksrggqlksettfehsyvdtlldiklpeegnrhltdaemvnlcaefltagtesptppppg
TRINITY_DN31928_c0_g2_i2.p1	AmCYP99 -DN31928	type:complete_len:514_(+),score=51.98_TRINITY_DN31928_c0_g2_i2:85-1626(+)	mmdlnaatlvsislvslavpvsllgrkwarsskarrppgprclpfigslhhlltsepqvalrdladkhgpvmylrlghvdtvvisspaaaqevlrdsalnfasrptllaaevfcygnrdiafapygaywrtlrklctvellsprkvsqfapirdhgtlslvrnicdagrggrlvnvgrllvscansitaratfgmevdaelqeqfvsairygmeysggfcvgdlfpslwfvdvltglrhrlgraqgkldvvygkiiagcealrdekkttaataggddlltimlrirdeqnlefpitttnikaiildmftggtetssssvewimselmrnpgvmakaqhevrqifdkrhtedheglldelrylkmvvkeglrlhpvlplllpricretcnvggfqvtkgs…
TRINITY_DN2526_c1_g1_i1.p1	AmGSTF1 -DN2526	type:3prime_partial_len:152_(+),score=28.41_TRINITY_DN2526_c1_g1_i1:163-615(+)	mapvrvfgpaksinvarvllcleevgaeyelvhmdlfqakeqmspehlarnpfgkvpalqdgelvlfearaiakyvlrkyksdllregnleeaamvdvwteveahtynpalspivyqcligpmmrgvptdekvvaesleklkkvlevyear
TRINITY_DN2526_c1_g1_i15.p1	AmGSTF1 -DN2526	type:complete_len:131_(+),score=29.03_TRINITY_DN2526_c1_g1_i15:22-393(+)	mvdvwteveahtynpalspivyqcligpmmrgvptdekvvaesleklkkvlevyearlskhsylagdfvsfadlnhfpytfyfmatphaalfdsyphvkawwerlmarpavkkiaatmvppka*
TRINITY_DN2526_c1_g1_i4.p1	AmGSTF1 -DN2526	type:complete_len:131_(+),score=24.75_TRINITY_DN2526_c1_g1_i4:22-393(+)	mvdvwteveahtynpalspivyqcligpmmrgvptdekvvaesleklkkvlevyearlskhsylagdfvsfadlnhfpytfyfmatphatlfdsyphvkawwerlmarpavkkiaatmvppka*
TRINITY_DN2526_c1_g1_i11.p1	AmGSTF1 -DN2526	type:5prime_partial_len:151_(+),score=28.86_TRINITY_DN2526_c1_g1_i11:1-453(+)	aiakyvlrkyktdgvdllregnleeaamvdvwteveahtynpalspivyqcligpmmrgvptdekvvaesleklkkvlevyearlskhsylagdfvsfadlnhfpytfyfmatphatlfdsyphvkawwerlmarpavkkiaatmvppka*
TRINITY_DN2526_c1_g1_i6.p1	AmGSTF1 -DN2526	type:3prime_partial_len:110_(+),score=24.14_TRINITY_DN2526_c1_g1_i6:22-327(+)	mvdvwteveahtynpalspivyqcligpmmrgvptdekvvaesleklkkvlevyearlskhsflagdfvsfadlnhfpytfyfmatphaalfdsyphvkaww
TRINITY_DN2526_c0_g1_i1.p1	AmGSTF-DN2526_c0	type:complete len:215 (+)score39.14 TRINITY_DN2526_c0_g1_i1:251-895(+)	mapvklygatlswnvtrcvaaleeagvdyeivpinfstgehkgpehlarnpfgqvpalqdgdlyifesraickyacrkskpellkegdlkesamvdvwveveanqytaalgpilfeclvhpmlggatdqkvvednvaklkkvlevyearltkskylagdylsladlnhvsttlclgatpyaslfdayphvkawwtdllarpsvqkvaslmkpsh*
TRINITY_DN2526_c0_g1_i2.p1	AmGSTF-DN2526_c0	type:3prime_partial len:155 (+)score32.66 TRINITY_DN2526_c0_g1_i2:251-712(+)	mapvklygatlswnvtrcvaaleeagvdyeivpinfstgehkgpehlarnpfgqvpalqdgdlyifesraickyacrkskpellkegdlkesamvdvwveveanqytaalgpilfeclvhpmlggatdqkvveanlvklknvlevyearltkck
TRINITY_DN2526_c0_g1_i4.p1	AmGSTF-DN2526_c0	type:complete len:215 (+)score38.14 TRINITY_DN2526_c0_g1_i4:250-894(+)	mapvklygatlswnvtrcvaaleeagvdyeivpinfstgehkgpehlarnpfgqvpalqdgdlyifesraickyacrkskpellkegdlkesamvdvwveveanqytaalgpilfeclvhpmlggatdqkvvednvaklkkvlevyearltkskylagdylsladlnhvsttlclgatpyaslfdayphvkawwtdllarpsvqkvaslmkpsh*
TRINITY_DN2526_c0_g1_i5.p1	AmGSTF-DN2526_c0	type:5prime_partial len:281 (+)score35.54 TRINITY_DN2526_c0_g1_i5:2-844(+)	idlpataphrrtdrqagthsqrpkvsrstarathllpllvarllnrdperrlspphshpsagdqlamapvklygatlswnvtrcvaaleeagvdyeivpinfstgehkgpehlarnpfgqvpalqdgdlyifesraickyacrkskpellkegdlkesamvdvwveveanqytaalgpilfeclvhpmlggatdqkvvednvaklkkvlevyearltkskylagdylsladlnhvsttlclgatpyaslfdayphvkawwtdllarpsvqkvaslmkpsh*
TRINITY_DN59717_c0_g1_i1.p2	AmGSTF1 -DN59717	type:complete_len:144_(+),score=31.57_TRINITY_DN59717_c0_g1_i1:55-432(+)	mvdvwteveaqqyhpalrlimlecflnptlrglptnqevvdeglqkarkvlqvyeerlslhrylagdffsfadlnhfastfyvmdatpyaslfdsypnvkawwedlmsrpsfrkisanmttkvqs*
TRINITY_DN15440_c0_g1_i5.p1	AmGSTF2	type:complete_len:225_(+),score=61.09_TRINITY_DN15440_c0_g1_i5:8-682(+)	mapavkvygwavspfvarallcleeagveyelvamnpeagdhlradflaknpfaqvpvledgdltlfesraiarhvlrkhkpellvgdgspeaaamvdvwleveaqqhqaptaaitvqcivapllggsrdqaivdenvpklkkvlevyearlsasrylagesvsladlshfpmmryfmeteykalveelphvkawweelkarpaarkvtefmpadfgigkkadk*
TRINITY_DN15440_c0_g1_i4.p1	AmGSTF2	type:5prime_partial_len:169_(+),score=47.44_TRINITY_DN15440_c0_g1_i4:1-507(+)	pvledgdltlfesraiarhvlrkhkpellvgdgspeaaamvdvwleveaqqhqaptaaitvqcivapllggsrdqaivdenvpklkkvlevyearlsasrylagesvsladlshfpmmryfmeteykalveelphvkawweelkarpaarkvtefmpadfgigkkadk*
TRINITY_DN15440_c0_g1_i2.p1	AmGSTF2	type:5prime_partial_len:169_(+),score=47.44_TRINITY_DN15440_c0_g1_i2:1-507(+)	pvledgdltlfesraiarhvlrkhkpellvgdgspeaaamvdvwleveaqqhqaptaaitvqcivapllggsrdqaivdenvpklkkvlevyearlsasrylagesvsladlshfpmmryfmeteykalveelphvkawweelkarpaarkvtefmpadfgigkkadk*
TRINITY_DN15440_c0_g1_i1.p1	AmGSTF2	type:complete_len:225_(+),score=59.97_TRINITY_DN15440_c0_g1_i1:203-877(+)	mapavkvygwavspfvarallcleeagveyelvamnreagdhlrpdfvarnpfaqvpvledgdltlfesraiarhvlrkhkpellvgdgspeaaamvdvwleveaqqhqaptaaitvqcivapllggsrdqaivdenvpklkkvlevyearlsasrylagesvsladlshfpmmryfmeteykalveelphvkawweelkarpaarkvtefmpadfgigkkadk*
TRINITY_DN15440_c0_g1_i7.p1	AmGSTF2	type:complete_len:225_(+),score=59.97_TRINITY_DN15440_c0_g1_i7:186-860(+)	mapavkvygwavspfvarallcleeagveyelvamnreagdhlrpdfvarnpfaqvpvledgdltlfesraiarhvlrkhkpellvgdgspeaaamvdvwleveaqqhqaptaaitvqcivapllggsrdqaivdenvpklkkvlevyearlsasrylagesvsladlshfpmmryfmeteykalveelphvkawweelkarpaarkvtefmpadfgigkkadk*
TRINITY_DN15440_c0_g1_i3.p1	AmGSTF2	type:5prime_partial_len:169_(+),score=47.44_TRINITY_DN15440_c0_g1_i3:1-507(+)	pvledgdltlfesraiarhvlrkhkpellvgdgspeaaamvdvwleveaqqhqaptaaitvqcivapllggsrdqaivdenvpklkkvlevyearlsasrylagesvsladlshfpmmryfmeteykalveelphvkawweelkarpaarkvtefmpadfgigkkadk*
TRINITY_DN2332_c0_g2_i2.p1	AmGSTU10	type:internal_len:123_(+),score=18.59_TRINITY_DN2332_c0_g2_i2:1-366(+)	sgtgpsllssdpheraiarfwaayideklivawrqafsgkteedksegtkqmfaaldtlegslrdcskghgyfggesvglvdvwlgsllswlkasavnsgiqifdpikgvfgraplhstpll
TRINITY_DN4002_c0_g1_i1.p1	AmGSTU11	type:complete_len:261_(+),score=46.30_TRINITY_DN4002_c0_g1_i1:53-784(+)	maaanstekaavrvlggrmspftmrarmalelrgvayelveerfeprksdrllaanavykkipvlllpdgraicesavivhyvdeahwpaataapsllpkdpyeramhrfwttyvddrfwpaldgaslaptpearsksaaearaalrlleeafmacsnggaffsggaapglldialgcflpalracerlsgaalldeantpllskwsqrfvgvdavkavlpetdevvgftrflqdkfgvafpn*
TRINITY_DN2759_c0_g1_i9.p1	AmGSTU8	type:complete_len:237_(+),score=44.84_TRINITY_DN2759_c0_g1_i9:220-930(+)	maagddlkllgvwaspfvtrvklalsfkglsfenveedlgnkselllssnpvhkkvpvllhngkpicesvvivqyideafagtgpsllssdpheravarfwaayiddklvapwiqsfrgkteeeksegikqtfaaaetlegalrecskgqgyfggesvglvdvslgsllswlkatevmsganifdpiktpllaawverfteldgakaalpdvdrvvefakkrqaqaaaasaalenk*
TRINITY_DN8858_c0_g4_i2.p1	AmGSTU9	type:complete_len:234_(+),score=44.54_TRINITY_DN8858_c0_g4_i2:147-848(+)	mdgegevkvlgtvvspfalrvrmalylkgvsyeyleqdlfaksellvasnpvhkkvpvlihggkpiceslaivqyvdefwagaapilpadpyhravarfwaayvddkvfpawigilraateeerceklaatlavvapmeealaacsdgeaffsggdslgyldlalgchlfwlealrtmfgmtvidggrtprlaawakrfletkaaktvapptnsmeeyagklraiwaaaaatk*
TRINITY_DN13202_c0_g1_i2.p1	7-deoxyloganetin glucosyltransferase -DN13202	type:complete_len:465_(+),score=73.62_TRINITY_DN13202_c0_g1_i2:195-1397(+)	mttclphmkklledlnstagvppvtfvlgdnvmsfcldaaaavgvpcvlfwtasasgymgyrnfrflmdegfsplkdeeqlrngyldtavtqapgmskhmrlrdfpsficttdrtdfllnfliheveqtdraaaivlntldeleqpaldamrailppkiytigplnllaeqllpdgggplattrsslwredrsclewlhgreprsvvyvnygsittmssqelvefawglancgydflwivrddllgkgdtaaaavlppefleatkgrclltswceqeavlrheavgvflthcgwnsvteglsagvpilcwpffaeqqtnsryscvewgvamevggdvrrevvearireamggergkemkrkavqwseigaraatrpggrsvanlenllndvltaskkva…
TRINITY_DN3705_c0_g1_i1.p1	Anthocyanidin 3-O-glucosyltransferase -DN3705	type:complete_len:464_(+),score=89.95_TRINITY_DN3705_c0_g1_i1:64-1455(+)	masngmhvvmfpflafghispfvqlarklvaaghgvrvtllsaaanvprvetmlgpsaaravavaplrlprvpglpegaestaelsadgaellkiavdgtrpqvaallaelrpdavlfdfatpwitevaaplgvktlqfsvfsavsgaylmvparrrpgavalsaddlasappgfppssalatvpayqatdftyvftsfhgepcvydrvlagvqasdalviktcfemegsyirylaaqhgkpvlvtgpgvpeppqgeleerwahwlssfpdssvvfasfgsetflpaaattelllglessnrpfmvvlnfprgtdveaelerctppgfaertkgrgvvhtgwvqqqhilrhrsvgcfvnhaglssvveglvascrlvllpmkgdqylnaalfgrdlrvg…
TRINITY_DN74652_c0_g3_i1.p1	Anthocyanidin 5,3-O-glucosyltransferase -DN74652	type:complete_len:468_(+),score=54.35_TRINITY_DN74652_c0_g3_i1:38-1441(+)	malackgaaphlvfvpsagmghilpftrfitaladmggvdisvvtalptvsqaeadhlaglfaafpairridlnllplddpafagtdpfflrweslrrsahllgpliagatpsasavitdvtlasqiipiakdelrlpchilfiscvtmlsflayfptylhdakadhlagdvdvpgigllpvdyppkvlrdpnslftkqfiangseiaqadgiivntfdalepdalaalrsgkvvpgfppvfavgplkststgtrssdaarpiawldqqparsvvyvafgnrnaaaldqireigagleasgcrflwvvkttvvdrediaelggvlgdgflervqgralvtkewvdqeavlkhpavglylshcgwnsvtesaaygvpmlawptlgdqrliatvirrrgfg…
TRINITY_DN762_c1_g1_i1.p1	Cis-zeatin O-glucosyltransferase -DN762	type:3prime_partial_len:169_(+),score=24.24_TRINITY_DN762_c1_g1_i1:161-664(+)	mpvsttrsavhcaeaqkkssmavdstesvafvavpfpaqghlnqlmhlsllvasrglsvhyaapaahlrqarsrvhgwdpkalgaiqfhdldvstyespapdptapspfpshllpmwetftaaaraplavlleslsathrrvvvvydnlnafaaveaarlsngeafgl
TRINITY_DN6487_c0_g2_i1.p2	Crocetin glucosyltransferase, chloroplastic -DN6487	type:5prime_partial_len:131_(+),score=4.29_TRINITY_DN6487_c0_g2_i1:3-395(+)	rrgmvvgwcdqarvlshpavgcfvthcgwnsalesiasgvpivcvpqwtdqptvawlleecagvgvrvevdgegvaargeiqrcvetvmgdghaaveiraraarwmerakeavtdggvlqrnlrafvsgl*
TRINITY_DN104783_c0_g1_i1.p1	Glycosyltransferase HGA-like -DN104783	type:internal_len:175_(+),score=30.37_TRINITY_DN104783_c0_g1_i1:1-522(+)	cvrsgghsyiplllyhspvttllystlrgregghaaperkteaamegggkmgkggggahhhetakllkavsrtveprnfgiglvagflivtcayfstakfdaihialispearnvaaagigppvkaapadgfsqrlagsdlgtpdpdnalsklgskaevldqddgdgggkilps
TRINITY_DN9621_c1_g1_i1.p1	Scopoletin glucosyltransferase -DN9621	type:3prime_partial_len:222_(+),score=22.55_TRINITY_DN9621_c1_g1_i1:69-665(+)	mldprkrpeewafyestnaadqrsfgevfnsfyelepdyvehfhstlgrrtwlvgpvalatdnrdvaatggsrtddlahsclrwldtkpaasvvyvsfgtlgnvshaelreiarglglsgtnfvwvvkgtessewmpegfaevltcadrgfiirgwapqtlvlkhpalggfvthcgwnsvleaissgvpmvtwprygdq
TRINITY_DN37251_c0_g1_i1.p2	UGT -DN37251	type:3prime_partial_len:142_(+),score=16.88_TRINITY_DN37251_c0_g1_i1:32-424(+)	mdftshkffgskewlelvwsklklqrrvlelgygflftdvdimwfrdpfkhvtayadmtvsadvyfgdpdnignfpntgffhvkpnkrtiamtklwhesrgvypganeqpvfnmikkrlvaklgvrlqyld
TRINITY_DN18987_c1_g1_i3.p1	UGT710C -DN18987	type:complete_len:266_(+),score=25.81_TRINITY_DN18987_c1_g1_i3:231-1028(+)	mvrqvlsratetvrnshglvintfealeiaeldrirrevdvtfvlatgplhklstrstgssllqqdrtciewlntqaagsvlyvsfgslasmdsselsevawglansgqpflwvvrrdlvrgsdgsglpegfyravegrgkvipwapqqevlahsavggfwthngwnstlesiaeglpmicrpqfadqmmntryveavwgvgfeiqgelernkieeairnlmkgshaevmrerarelknkvtsclesggssllaidklidyissl*
TRINITY_DN18987_c1_g1_i2.p1	UGT710C -DN18987	type:5prime_partial_len:277_(+),score=38.98_TRINITY_DN18987_c1_g1_i2:1-831(+)	ssfagvayaadepaaaclfidanllavqkaavalglptvvlrtgsaacfscflaypmlhqkgylppkesqlytpveelpplrvrdlflsgsnnpemvrqvlsratetvrnshglvintfealeiaeldrirrevdvtfvlatgplhklstrstgssllqqdrtciewlntqaagsvlyvsfgslasmdsselsevawglansgqpflwvvrrdlvrgsdgsglpegfyravegrgkvipwadgphsrrcwptlqlvgfgptmagtrhskasprvsq*
TRINITY_DN18987_c1_g1_i1.p1	UGT710C -DN18987	type:5prime_partial_len:361_(+),score=60.08_TRINITY_DN18987_c1_g1_i1:1-1083(+)	ssfagvayaadepaaaclfidanllavqkaavalglptvvlrtgsaacfscflaypmlhqkgylppkesqlytpveelpplrvrdlflsgsnnpemvrqvlsratetvrnshglvintfealeiaeldrirrevdvtfvlatgplhklstrstgssllqqdrtciewlntqaagsvlyvsfgslasmdsselsevawglansgqpflwvvrrdlvrgsdgsglpegfyravegrgkvipwapqqevlahsavggfwthngwnstlesiaeglpmicrpqfadqmmntryveavwgvgfeiqgelernkieeairnlmkgshaevmrerarelkkkvtsclesggssllaidklldhissl*
TRINITY_DN15660_c0_g3_i1.p1	UGT73B -DN15660	type:internal_len:153_(+),score=14.80_TRINITY_DN15660_c0_g3_i1:2-457(+)	ivflpffapghlipassmaavfasrgarctilttpvnadiirpaidrandsspgspaidislmpfpdvglppgvenvtalttlkgdyranfmqagqlvreplerfladhrpdavvsdsffsctadaaaehgvprlvflgtsmfarscyesml
TRINITY_DN73279_c0_g1_i3.p1	UGT73B -DN73279	type:5prime_partial_len:130_(+),score=5.10_TRINITY_DN73279_c0_g1_i3:1-390(+)	pavgafvthcgwnsvletvaagvpvlswpivfeqfiterlltevlgigerlwpdgagvrstryeenetvpavavaraltrfmepgghgdiarsrvvglaakvraavaeggssdrdlrrlvhdlmearga*
TRINITY_DN93328_c0_g1_i1.p1	UGT73B -DN93328	type:complete_len:466_(+),score=59.97_TRINITY_DN93328_c0_g1_i1:157-1554(+)	mraktstaprsrpdaaplrlvfvpflarshfaplaaaataascggdgtasaiiittahfaalapasvpvrvvpfrfpgghadfsllpdeasapaffaaaedalapvlaetlraptssgpvavvsdavlhwaprvarqcgvphvtfhtigafaaasmvgvhlhrtevspdpfvlpggfpvpvklrrahvneealahlplfraaeaesyavafnsfsaleadfaeyyrclhgspkkvfllgprraitarsdvavtggaerdpilkwldgqaagsvvyacfgstcglsaiqlkelgaglrasgmpflwviptptegmeeerasrhsmvvagrwapqseilehravggfvshcgwnsvldavwagvplatwplraeqflneaflvdvlrvgvrvrevaskadv…
TRINITY_DN1260_c0_g2_i1.p1	UGT74F -DN1260	type:complete_len:472_(+),score=61.99_TRINITY_DN1260_c0_g2_i1:36-1451(+)	metamnisdtssygdgqsqggarvllvplpaqghtnpmlqlgrrlayhglsptlaltryvlstgpapgepfsvaaisdgfdaggmgscpdpveycrkaeavgsqtlaqviadevsagrtpsvmvydphmswarpvardaglpaaafmsqscavdliygeawtgraplpmddgvelrrrgavsvdlgpddlspfvvspelypkyldvsirqfegleevedvlvnsfrdlepqeaeymesrwraktvgplqpsfflgddrlpsnraygidffsgdapcmawldqqqpdsvvlvsygtvysmdaaeldelgsglcdsgepflwvvrsneaqkiseevrdrckerglivpwcpqlevlahkavgcflthcgwnstteaivagvlmvtmprsadqptnakyves…
TRINITY_DN5345_c3_g1_i6.p1	UGT75E -DN5345_c3	type:internal_len:485_(+),score=60.20_TRINITY_DN5345_c3_g1_i6:3-1454(+)	sllraklhtqkkrdyrsqkkkkkrdyridlamaeaeclphgrgdgvrrhfllvaygiqshlnpcrllarslvqlqdvdgsgpvlatlsvplfthrrmfpssgngvleeeeatdgvipyapysdgiddgtnakdadgrarrrrasseslsaivarlaargrpvtcivgslvlpsaldvarehaipmavfwiqpatvlaayyhyfhgyseliashaadpayevnlpglckplrirdfpsflvdttgsemakvmngafrelfefmdeqgqgakflvntldelepaaltamrqhldvfavgpvigssadarihlfdhagadknrymewlgaqqemsvvyvsfgsiwtyskqqmeeiahglrqcgrpyllvvrkdgrqedvsrclddvvqegrgmvvewcdqpa…
TRINITY_DN5345_c3_g1_i4.p1	UGT75E -DN5345_c3	type:internal_len:478_(+),score=57.42_TRINITY_DN5345_c3_g1_i4:3-1433(+)	sllraklhtqkkrdyrsqkkkkkrdyridlamaeaeclphgrhfllvaygiqshlnpcrllarslvqlqdvdgsgpvlatlsvplfthrrmfpssgngvmeeeatdgvipyapysdgiddgtnakdadgrarrrrasseslsaivarlaargrpvtcivgslvlpsaldvarehaipmavfwiqpatvlaayyhyfhgyseliashaadpayevnlpglckplrirdfpsflvdttgsemakvmngafrelfefmdeqgqgakflvntldelepaaltamrqhldvfavgpvigssadarihlfdhagadknrymewlgaqqemsvvyvsfgsiwtyskqqmeeiahglrqcgrpyllvvrkdgrqedvsrclddvvqegrgmvvewcdqpavlshpsv…
TRINITY_DN5345_c3_g1_i1.p1	UGT75E -DN5345_c3	type:internal_len:479_(+),score=58.45_TRINITY_DN5345_c3_g1_i1:3-1436(+)	sllraklhtqkkrdyrsqkkkkkrdyridlamaeaeclphgrhfllvaygiqshlnpcrllarslvqlqdvdgsgpvlatlsvplfthrrmfpssgngvleeeeatdgvipyapysdgiddgtnakdadgrarrrrasseslsaivarlaargrpvtcivgslvlpsaldvarehaipmavfwiqpatvlaayyhyfhgyseliashaadpayevnlpglckplrirdfpsflvdttgsemakvmngafrelfefmdeqgqgakflvntldelepaaltamrqhldvfavgpvigssadarihlfdhagadknrymewlgaqqemsvvyvsfgsiwtyskqqmeeiahglrqcgrpyllvvrkdgrqedvsrclddvvqegrgmvvewcdqpavlshps…
TRINITY_DN5345_c3_g1_i2.p1	UGT75E -DN5345_c3	type:3prime_partial_len:105_(+),score=6.50_TRINITY_DN5345_c3_g1_i2:29-313(+)	mvvewcdqpavlshpsvgcfvthcgwnstleamasgvpvvaapsmfdqptnaflideewatgvrgkrngegvfagaelarcvdmvmgsdaramev
TRINITY_DN5345_c3_g1_i5.p1	UGT75E -DN5345_c3	type:5prime_partial_len:521_(+),score=65.21_TRINITY_DN5345_c3_g1_i5:3-1565(+)	sllraklhtqkkrdyrsqkkkkkrdyridlamaeaeclphgrgdgvrrhfllvaygiqshlnpcrllarslvqlqdvdgsgpvlatlsvplfthrrmfpssgngvmeeeatdgvipyapysdgiddgtnakdadgrarrrrasseslsaivarlaargrpvtcivgslvlpsaldvarehaipmavfwiqpatvlaayyhyfhgyseliashaadpayevnlpglckplrirdfpsflvdttgsemakvmngafrelfefmdeqgqgakflvntldelepaaltamrqhldvfavgpvigssadarihlfdhagadknrymewlgaqqemsvvyvsfgsiwtyskqqmeeiahglrqcgrpyllvvrkdgrqedvsrclddvvqegrgmvvewcdqpav…
TRINITY_DN5345_c3_g1_i8.p1	UGT75E -DN5345_c3	type:5prime_partial_len:498_(+),score=62.81_TRINITY_DN5345_c3_g1_i8:3-1496(+)	sllraklhtqkkrdyrsqkkkkkrdyridlamaeaeclphgrgdgvrrhfllvaygiqshlnpcrllarslvqlqdvdgsgpvlatlsvplfthrrmfpssgngvmeeeatdgvipyapysdgiddgtnakdadgrarrrrasseslsaivarlaargrpvtcivgslvlpsaldvarehaipmavfwiqpatvlaayyhyfhgyseliashaadpayevnlpglckplrirdfpsflvdttgsemakvmngafrelfefmdeqgqgakflvntldelepaaltamrqhldvfavgpvigssadarihlfdhagadknrymewlgaqqemsvvyvsfgsiwtyskqqmeeiahglrqcgrpyllvvrkdgrqedvsrclddvvqegrgmvvewcdqpav…
TRINITY_DN1430_c0_g1_i4.p1	UGT75K -DN1430	type:complete_len:496_(+),score=7.00_TRINITY_DN1430_c0_g1_i4:864-2351(+)	msglkinfhksevyvldqplleqrrvanmlncklgsmpflylglpisdrkltieqwaylvskmaakvetwmgrllssggrlilsnaclealptfamglfllqdgvhekmnairarffwegagpnrkyhwvnwpavcrpkqfgglgltntkvlnealmlkwiwklfhnspslwrtllvakypeatnifagqtqggspfwrslhkikhlfklgakfrvcngartffwldwwvgggplkdrfprlfavceneellvadaflvdgvrfrralsleataqwaglveelnsvelhegddevswslepsgrfsvasiyqklaqgapvshckdiwsaklplkikifiwqlalnrlpsnlnlanrfgpsdgscalcglgedashiffacalaklgwsvirrllgcswn…
TRINITY_DN34903_c2_g1_i1.p1	UGT75K -DN34903	type:3prime_partial_len:386_(+),score=67.53_TRINITY_DN34903_c2_g1_i1:154-1155(+)	mfpdageaveehvdgagvryapysdgfdggfvegshadnanymsqlkvvgsrtlggllarlrdtgrpvtqvvysvllswvpgvaralgvpaalywiqpatvlatyfhffrgtdgfdqvvaasgddpwaevrlpgfpaplrlrdlpsfltittddhphavildefrelvdvldrddkatvlantfdamepdavatlrqhgldvlpigpvlsfldsapasapvstnsndlfrqdgigylewldaqaaasvvyisfgslssmskrqisevargmaegghpflwvlrkdnrgevdvddlcagggmvvewcnqgkvlshpavgcfvthcgwnstlesva
TRINITY_DN34903_c2_g1_i2.p1	UGT75K -DN34903	type:internal_len:214_(+),score=37.50_TRINITY_DN34903_c2_g1_i2:1-639(+)	galageaphflvvtfpaqghinparhlalrllratpgarvtvstaisacrkmfpdageaveehvdgagvryapysdgfdggfvegshadnanymsqlkvvgsrtlggllarlrdtgrpvtqvvysvllswvpgvaralgvpaalywiqpatvlaayfhffrgtegfdeavaaaaadswaevrlpgfpvplrlrdlpsfltatsddhpyafvld
TRINITY_DN34903_c2_g1_i3.p1	UGT75K -DN34903	type:internal_len:135_(+),score=20.78_TRINITY_DN34903_c2_g1_i3:1-402(+)	dggfdkevhdnthymsqlkvvgartldgvlarlrdagrpvtqvvytvllswvagvarangvpsalywiqpatvlaayfhffrgtegfdeavaaaaadswaevrlpgfpvplrlrdlpsfltatsddhpyafvld
TRINITY_DN5345_c2_g1_i3.p1	UGT75K -DN5345_c2	type:3prime_partial_len:333_(+),score=30.07_TRINITY_DN5345_c2_g1_i3:163-1158(+)	mpavverpageaphflvvtypaqghinpachlalsllratpgarvtvstavsacrkmfpdageaqehvdgegvryapfsdgfdggfegaaheqtnymsqlkdvgsrtlhgvlarlrdaghpvtqvvytvllswvagvarahgvpsaiywiqpatvlatyfhffrrtdgfdkavagaasdpwaevrlpgfpaplrlrdvpsfltitsdehpyafllhafrdlldeldddhqedrrrttvlantfeamepdamatlrqhgldvvpvgpvlsfldaapastngnnmfkqdgkgylewldaqaaasvvyisfgslssmskrqiaevargmaesgrp
TRINITY_DN5345_c2_g1_i2.p2	UGT75K -DN5345_c2	type:internal_len:151_(+),score=20.11_TRINITY_DN5345_c2_g1_i2:3-452(+)	waevrlpgfpvplrlrdlpsfltatsddhpyafvldafrelvdeldrddtatvlvntfdamephavatlrqhgvdvvpvgpvlsfldapasaptsannndlfkqdgkgylewldaqaassvvyisfgslssmskrqiaevargmaesgrp
TRINITY_DN5345_c2_g1_i5.p1	UGT75K -DN5345_c2	type:3prime_partial_len:294_(+),score=45.45_TRINITY_DN5345_c2_g1_i5:118-879(+)	mpamveratgeaphflvvtypaqghinparhlarrllratpgarvtvstavsacrkmfpdageaeehvdgagvryapysdgfdggfdkevhdnthymsqlkvvgartldgvlarlrdagrpvtqvvytvllswvagvarangvpsalywiqpatvlaayfhffrgtegfdeavaaaaadpwaevrlpgfpvplrlrdlpsfltatsddhpyafvldafrelvdeldrddtatvlvntfdamephavatlrqhgv
TRINITY_DN5345_c2_g1_i4.p1	UGT75K -DN5345_c2	type:3prime_partial_len:255_(+),score=25.88_TRINITY_DN5345_c2_g1_i4:163-924(+)	mpavverpageaphflvvtypaqghinpachlalsllratpgarvtvstavsacrkmfpdageaqehvdgegvryapfsdgfdggfegaaheqtnymsqlkdvgsrtlhgvlarlrdaghpvtqvvytvllswvagvarangvpsalywiqpatvlaayfhffrgtdgfdeavaaaaadpwaevrlpgfpvplrlrdlpsfltatsddhpyafvldafrelvdeldrddtatvlvntfdamephavatlrqhgv
TRINITY_DN5345_c2_g1_i1.p1	UGT75K -DN5345_c2	type:3prime_partial_len:281_(+),score=55.72_TRINITY_DN5345_c2_g1_i1:85-840(+)	mvegalageaphflvvtfpaqghinparhlalrllratpgarvtvstavsacrkmfpdageaeehvdgagvryapysdgfdggfdkevhdnthymsqlkvvgartldgvlarlrdagrpvtqvvytvllswvagvarangvpsalywiqpatvlaayfhffrgtegfdeavaaaaadpwaevrlpgfpvplrlrdlpsfltatsddhpyafvldafrelvdeldrddtatvlvntfdamephavatlrqhgv
TRINITY_DN85010_c0_g2_i1.p2	UGT75K -DN85010	type:3prime_partial_len:116_(+),score=16.18_TRINITY_DN85010_c0_g2_i1:35-346(+)	mephavatlrqhgvgvvpigpvlsfldapasapasvnnndlfkqdgkgylewldaqaaasvvyisfgslssmskrqiaevargmaesgrpflwvlrkdnrgevd
TRINITY_DN19306_c3_g1_i1.p1	UGT83A -DN19306	type:5prime_partial_len:104_(+),score=5.07_TRINITY_DN19306_c3_g1_i1:1-312(+)	cgwnstmegmlhgvpfvcwpyfadqfcnqsyvcsvwgtgvrlwrnergvvtkeeiqskvawlledeeikaraamwkhkacasiaeggssyhnllelvnllseq*
TRINITY_DN5345_c1_g2_i1.p2	UGT84C -DN5345_c1	type:5prime_partial_len:134_(+),score=15.99_TRINITY_DN5345_c1_g2_i1:1-402(+)	vpwspqdlvlahpstacflthggwnstletlaagvpvvafpqwgdqctdakylvkefkmgvrisaplrrdavrdavedavagpdaglmmenarawstaaktavaaggssdrhvqafvdevlarsirargnveq*
TRINITY_DN23693_c0_g1_i2.p1	UGT85A -DN23693	type:internal_len:131_(+),score=16.73_TRINITY_DN23693_c0_g1_i2:1-390(+)	rsyiysytrplplpighchykqegafppteenpvasltrkstipgddgmgaipanerphvvlvplpaqghvtpmmklakilhckgfhvtfvnteynhrrlvrsrgpaavaglpdfrfatipdglppsdad
TRINITY_DN23693_c0_g1_i1.p1	UGT85A -DN23693	type:internal_len:131_(+),score=17.95_TRINITY_DN23693_c0_g1_i1:1-390(+)	rsyiysytrplplpighchykqegafppteenpvasltrkstipgddgmgaipasekphvvlvplpaqghvtpmmklgkilhskgfhvtfvnteynhrrlvrsrgpaavaglpdfrfatipdglppsdad
TRINITY_DN23693_c0_g1_i3.p1	UGT85A -DN23693	type:internal_len:131_(+),score=15.69_TRINITY_DN23693_c0_g1_i3:1-390(+)	rsyiysytrplplpighchykqegafppteenpvasltrkstipgddgmgaipanekphavlvplpaqghvtpmmklakilhsrgfhvtfvnteynhrrlvrsrgpaavaglpdfrfatipdglppsdad
TRINITY_DN23693_c0_g1_i4.p1	UGT85A -DN23693	type:internal_len:131_(+),score=16.39_TRINITY_DN23693_c0_g1_i4:1-390(+)	rsyiysytrplplpighchykqegafppteenpvasltrkstipgddgmgaipanekphvvlvplpaqghvtpmmklakilhckgfhvtfvnteynhrrlvrsrgpaavaglpdfrfatipdglppsdad
TRINITY_DN23693_c0_g1_i5.p1	UGT85A -DN23693	type:internal_len:131_(+),score=15.05_TRINITY_DN23693_c0_g1_i5:1-390(+)	rsyiysytrplplpighchykqegafppteenpvasltrkstipgddgmgaipanekphavlvplpaqghvtpmmklakilhsrgfhvtfvnteynhrrlvrsrgpaavaglpdfrfatipdglppsdad
TRINITY_DN1686_c4_g1_i1.p1	UGT88B -DN1686	type:internal_len:145_(+),score=19.59_TRINITY_DN1686_c4_g1_i1:2-433(+)	virfhhlpavepptdyvgieefvsrfvqlhadhvkaaitaltcpvaalvidffgtmlfdmcrelavpayvyftadaafyafllrlpalheevtvefdemegmvdlpglppvppsslpmpvmdkknpnytwfvyhgrrfmeadgv
TRINITY_DN27787_c0_g1_i3.p1	UGT89B -DN27787	type:internal_len:130_(+),score=13.87_TRINITY_DN27787_c0_g1_i3:3-389(+)	rsyvpgdpgwelvregfllnsrawgavvntfeamesdflehlkrrfghgrvwavgpvadsvcrvggerptaeaedlfswlagcparsvmyvcfgsmykpppaqsaalgaaleasgvrfvwavgadvavq
TRINITY_DN27787_c0_g1_i4.p1	UGT89B -DN27787	type:internal_len:129_(+),score=19.03_TRINITY_DN27787_c0_g1_i4:1-384(+)	syvpgdpdwelvregfllnsrawgavvntfeamesdflehlkrrfghgrvwavgpvadsvcrevverptaeaeelfswlagcparavmyvcfgsmykpppaqsaalgaaleasgvrfvwavgadvavq
TRINITY_DN27787_c0_g1_i5.p1	UGT89B -DN27787	type:internal_len:129_(+),score=17.56_TRINITY_DN27787_c0_g1_i5:1-384(+)	syvpgdpdwelvregfllnsrawgavvntfeamesdflehlkrrfghgrvwavgpvadsvcrvggerptaeaeelfswlagcparavmyvcfgsmykpppaqsaalgaaleasgvrfvwavgadvavq
TRINITY_DN27787_c0_g1_i2.p1	UGT89B -DN27787	type:internal_len:129_(+),score=14.24_TRINITY_DN27787_c0_g1_i2:1-384(+)	syvpgdpdwelvregfllnsrawgavvntfeamesdflehlkrrfghgrvwavgpvadsvcrvggerptaeaedlfswlagcparsvmyvcfgsmykpppaqsaalgaaleasgvrfvwavgadvavq
TRINITY_DN118997_c0_g1_i2.p1	UGT90A -DN118997	type:complete_len:483_(+),score=56.55_TRINITY_DN118997_c0_g1_i2:97-1449(+)	mpllhlarlllarglasavtfytttrnapfiraglagladaasvvelpfpsgsyddgphstdelpsssvsdflglltaattlrpvfaaalaaaqpapdllvhdgfllwakgvadelalprlvtvgigvfasyvtgavvthrpharvgspsepfpvhglpglrltkadlhppfddpepagphwdmvcescsvmetssgviansfdglesvyvdlwnkefrprmwtvgplclaagpavqtmddldisdwldsrlamgrpvlyvafgsqaelsraqleeiaagldrsgleflwvvrskwftaedrftdrfgdrgkvvegfidqlgvlshdsvrgffthcgwnsvlesitmgvpilafpmaaeqklnakfvvdvihiglrvrprddvdkageglvmsgdievl…
TRINITY_DN196_c0_g3_i1.p1	Am 12-oxophytodienoate reductase 1 (OPR-1)	type:complete_len:363_(+),score=43.08_TRINITY_DN196_c0_g3_i1:226-1314(+)	mepiplltpykmgqldlahrivlapltrqrsygnvpqphaalyysqrasagglliteatgvsdtaqgytdtpgiwttehveawktivagvhekgalifcqiwqvgrvstfelqpggkapvsstekgvgpqisfdghreefspprrlaveeipgivddfrkaarnaidagfdgveihgangylieqflkdsandrtdeyggslenrcrfalevvdavvkevgghrvgirlspftdfmdchdsdphalalhmstvlndhdilyvhmieprmaivdgrrvvpkrllpyreafkgtfianggydreeggkvvtegytdlvafgrlflsnpdlpkrfeigaelnkydrmtfytsdpvvgytdypfld*
TRINITY_DN108857_c0_g1_i1.p1	Am D-3-phosphoglycerate dehydrogenase 1	type:5prime_partial_len:146_(+),score=19.59_TRINITY_DN108857_c0_g1_i1:1-438(+)	rgirvseerilmdgspdipldyikvqiahveskfpsaisesgeitvegkvkdgvphltkvgafevdvsmegslilcrqvdqpgmigsvgsvlgeenvnvsfmsvgriaprkravmaigvdeepskatltkigeipaieefvflkl*

## Sheet: Table S5
Table S5. HUB gene list in the turquoise, pink and blue modules. HS: sensitive population, NTSR3: derived from HS and selected for resistance to fenoxaprop-P-ethyl, NTSR2: derived from HS and selected for resistance to pendimethalin.
NA=non applicable
ID	log2FoldChange NTSR3 vs HS	padj NTSR3 vs HS	log2FoldChange NTSR2 vs HS	padj NTSR2 vs HS	Blast.Hit.Accession	AHRD.Quality.Code	Human.Readable.Description	Interpro.ID..Description.	Gene.Ontology.Term	Gene Significance in Fenoxaprop_resistance	Module Membership	Module
TRINITY_DN99810_c0_g1	3.07705	0.171804	-3.39281	0.809112	NA	NA	NA	NA	NA	0.9133	0.896216	Turquoise
TRINITY_DN9974_c0_g1	2.62949	0.0619431	1.42951	1	NA	NA	Unknown protein	NA	NA	0.835617	0.843196	Turquoise
TRINITY_DN9971_c0_g1	0.28994	1	-0.133416	1	tr|A0A3L6TQR5|A0A3L6TQR5_PANMI	***	DNA helicase INO80	IPR000330 (SNF2-related, N-terminal domain), IPR001650 (Helicase, C-terminal), IPR020838 (DBINO domain), IPR027417 (P-loop containing nucleoside triphosphate hydrolase), IPR031047 (DNA helicase Ino80)	NA	0.791318	0.801431	Turquoise
TRINITY_DN9965_c1_g1	4.23559	0.0108385	-0.684455	1	NA	NA	NA	NA	NA	0.888471	0.901863	Turquoise
TRINITY_DN99575_c0_g1	5.0921	7.81e-06	-0.484736	1	NA	NA	Unknown protein	NA	NA	0.838395	0.84574	Turquoise
TRINITY_DN995_c0_g1	-0.610097	1	-0.0942394	1	tr|A0A446WTP5|A0A446WTP5_TRITD	***	F-box domain-containing protein	IPR032675 (Leucine-rich repeat domain, L domain-like)	NA	-0.881622	-0.873766	Turquoise
TRINITY_DN99417_c0_g1	1.65777	1	-1.44905	1	NA	NA	NA	NA	NA	0.854195	0.84502	Turquoise
TRINITY_DN994_c0_g2	-1.40472	1	0.137284	1	NA	NA	Unknown protein	NA	NA	-0.803852	-0.813877	Turquoise
TRINITY_DN9905_c1_g3	7.10586	2.53e-06	0	1	NA	NA	NA	NA	NA	0.919009	0.915863	Turquoise
TRINITY_DN990_c0_g1	13.1681	NA	8.17563	NA	NA	NA	Unknown protein	NA	NA	0.984468	0.983664	Turquoise
TRINITY_DN99_c3_g2	5.37171	0.00249429	2.61396	1	NA	NA	NA	NA	NA	0.891835	0.904199	Turquoise
TRINITY_DN9892_c0_g1	0.998973	1	0.170971	1	tr|I1GPV5|I1GPV5_BRADI	***	SWIM-type domain-containing protein	IPR004330 (FAR1 DNA binding domain), IPR007527 (Zinc finger, SWIM-type), IPR018289 (MULE transposase domain), IPR031052 (FHY3/FAR1 family)	GO:0006355, GO:0008270	0.847837	0.854052	Turquoise
TRINITY_DN9886_c0_g2	0.710945	1	-0.69656	1	tr|A0A3L6EWM9|A0A3L6EWM9_MAIZE	***	ATP synthase mitochondrial F1 complex assembly factor 1	IPR010591 (ATP11)	NA	0.823468	0.815723	Turquoise
TRINITY_DN9882_c0_g1	2.13777	0.252195	0.533116	1	NA	NA	NA	NA	NA	0.890003	0.894639	Turquoise
TRINITY_DN986_c0_g2	0.864145	1	-0.174111	1	tr|I1IXH3|I1IXH3_BRADI	***	AB hydrolase-1 domain-containing protein	IPR029058 (Alpha/Beta hydrolase fold)	NA	0.835798	0.816733	Turquoise
TRINITY_DN98589_c0_g1	1.71893	0.858796	-3.68719	0.287158	NA	NA	Unknown protein	NA	NA	0.921757	0.908828	Turquoise
TRINITY_DN98541_c0_g1	1.40706	1	-0.570671	1	NA	NA	NA	NA	NA	0.881967	0.889475	Turquoise
TRINITY_DN98483_c0_g1	7.18779	7.7e-06	0	1	NA	NA	NA	NA	NA	0.857176	0.861875	Turquoise
TRINITY_DN9847_c0_g1	3.43415	6.37e-10	1.51157	1	NA	NA	Unknown protein	NA	NA	0.885011	0.908254	Turquoise
TRINITY_DN984_c0_g1	0.543289	1	0.062003	1	sp|Q336N8|JM706_ORYSJ	***	Lysine-specific demethylase JMJ706	IPR003347 (JmjC domain), IPR003349 (JmjN domain), IPR004198 (Zinc finger, C5HC2-type)	GO:0000122, GO:0000792, GO:0001227, GO:0003682, GO:0005634, GO:0006325, GO:0016491, GO:0016577, GO:0032452, GO:0032454, GO:0033169, GO:0034647, GO:0034721, GO:0035064, GO:0035097, GO:0045815, GO:0046872, GO:0048439, GO:0051213, GO:0055114	0.808932	0.809735	Turquoise
TRINITY_DN9788_c0_g3	2.55596	0.0232598	1.47688	1	tr|A0A1E5V181|A0A1E5V181_9POAL	*-*	Cysteine-rich receptor-like protein kinase 25	IPR002902 (Gnk2-homologous domain), IPR011009 (Protein kinase-like domain), IPR013320 (Concanavalin A-like lectin/glucanase domain)	GO:0004672, GO:0005524, GO:0006468, GO:0016020, GO:0016021, GO:0016301, GO:0016310	0.836286	0.850833	Turquoise
TRINITY_DN9783_c0_g3	3.75518	0.134839	-0.80496	1	NA	NA	NA	NA	NA	0.923316	0.931978	Turquoise
TRINITY_DN97726_c0_g1	1.42485	1	-0.357227	1	NA	NA	NA	NA	NA	0.838669	0.843083	Turquoise
TRINITY_DN977_c0_g1	1.96884	0.278407	-1.18189	1	tr|A0A3B6TGT2|A0A3B6TGT2_WHEAT	*-*	BURP domain-containing protein	IPR004873 (BURP domain)	NA	0.904137	0.902105	Turquoise
TRINITY_DN97688_c0_g1	2.12872	0.479239	-0.448805	1	NA	NA	NA	NA	NA	0.887497	0.878049	Turquoise
TRINITY_DN9751_c0_g1	-0.697327	1	0.317645	1	tr|A0A3B6RFT0|A0A3B6RFT0_WHEAT	*-*	KIX_2 domain-containing protein	IPR003101 (Coactivator CBP, KIX domain)	NA	-0.854977	-0.840923	Turquoise
TRINITY_DN97505_c1_g1	7.45756	7.54e-07	3.45584	0.675673	NA	NA	NA	NA	NA	0.904116	0.900895	Turquoise
TRINITY_DN9732_c0_g1	-2.4207	2.02e-05	-0.0991897	1	NA	NA	NA	NA	NA	-0.902287	-0.90698	Turquoise
TRINITY_DN9727_c0_g1	1.48091	1	0.123748	1	NA	NA	NA	NA	NA	0.839735	0.852495	Turquoise
TRINITY_DN9719_c0_g1	3.77186	NA	1.25745	NA	NA	NA	Unknown protein	NA	NA	0.97484	0.978834	Turquoise
TRINITY_DN9715_c0_g3	-0.791496	1	-0.193054	1	NA	NA	NA	NA	NA	-0.827738	-0.830351	Turquoise
TRINITY_DN96990_c0_g2	2.81873	0.178496	1.26336	1	NA	NA	Unknown protein	NA	NA	0.852489	0.852003	Turquoise
TRINITY_DN96969_c0_g1	3.16066	0.00311138	1.32746	1	NA	NA	NA	NA	NA	0.92885	0.937731	Turquoise
TRINITY_DN96872_c0_g1	3.43741	0.191444	-2.61864	1	NA	NA	NA	NA	NA	0.89278	0.879614	Turquoise
TRINITY_DN96867_c0_g1	3.26339	0.175286	-1.95992	1	NA	NA	Unknown protein	NA	NA	0.877769	0.872283	Turquoise
TRINITY_DN96763_c0_g1	2.67604	0.114183	-0.0155586	1	NA	NA	NA	NA	NA	0.91133	0.901011	Turquoise
TRINITY_DN9651_c0_g1	6.06625	0.000136751	2.89844	1	NA	NA	NA	NA	NA	0.924544	0.918286	Turquoise
TRINITY_DN9646_c0_g1	4.02133	0.438495	-0.456486	1	NA	NA	NA	NA	NA	0.951737	0.961821	Turquoise
TRINITY_DN9641_c0_g1	6.88608	0.00186381	2.16257	1	NA	NA	NA	NA	NA	0.919965	0.926799	Turquoise
TRINITY_DN9635_c0_g1	0.830125	1	-0.0345516	1	NA	NA	Unknown protein	NA	NA	0.831559	0.828394	Turquoise
TRINITY_DN96349_c0_g2	2.86698	0.350163	1.33862	1	tr|T1NWX6|T1NWX6_TRIUA	***	F-box domain-containing protein	IPR001810 (F-box domain)	NA	0.811021	0.835168	Turquoise
TRINITY_DN9629_c0_g3	4.64154	NA	3.14065	NA	NA	NA	NA	NA	NA	0.918636	0.929971	Turquoise
TRINITY_DN9625_c0_g1	2.42187	NA	-1.15404	NA	tr|A0A446T2W9|A0A446T2W9_TRITD	*-*	Chorismate_bind domain-containing protein	IPR005801 (ADC synthase)	NA	0.846969	0.85011	Turquoise
TRINITY_DN96078_c0_g2	2.61005	0.444788	0.774001	1	NA	NA	Unknown protein	NA	NA	0.809149	0.825055	Turquoise
TRINITY_DN9587_c0_g1	0.867041	1	-0.237387	1	tr|A0A0Q3I9S2|A0A0Q3I9S2_BRADI	***	Protein kinase domain-containing protein	IPR011009 (Protein kinase-like domain)	GO:0004672, GO:0005524, GO:0006468	0.881302	0.871811	Turquoise
TRINITY_DN95852_c0_g1	5.83947	0.00345516	0	1	NA	NA	NA	NA	NA	0.890091	0.880691	Turquoise
TRINITY_DN9585_c0_g1	1.41588	0.608594	-0.0313161	1	tr|A0A1Q3CQL0|A0A1Q3CQL0_CEPFO	***	DUF3128 domain-containing protein	IPR021475 (Protein of unknown function DUF3128)	NA	0.853981	0.850666	Turquoise
TRINITY_DN95821_c0_g1	4.94157	0.00678025	0.444321	1	NA	NA	NA	NA	NA	0.975643	0.966527	Turquoise
TRINITY_DN95785_c0_g1	4.64038	0.0023709	-0.432136	1	NA	NA	Unknown protein	NA	NA	0.955234	0.957611	Turquoise
TRINITY_DN9578_c0_g2	2.28083	0.126446	0.663822	1	NA	NA	Unknown protein	NA	NA	0.90057	0.901435	Turquoise
TRINITY_DN9573_c2_g2	3.64891	0.143225	0.591648	1	NA	NA	NA	NA	NA	0.836314	0.852122	Turquoise
TRINITY_DN957_c1_g1	2.5645	0.027606	0.758498	1	tr|I1IIH7|I1IIH7_BRADI	*-*	PsbP domain-containing protein	NA	GO:0005509, GO:0009523, GO:0009654, GO:0015979, GO:0019898	0.916157	0.927988	Turquoise
TRINITY_DN9569_c0_g1	0.374967	1	-0.106785	1	tr|A0A097PLD0|A0A097PLD0_BRADI	***	PHP	IPR007852 (Cdc73/Parafibromin), IPR031336 (Cell division control protein 73, C-terminal), IPR032041 (Paf1 complex subunit Cdc73, N-terminal domain)	GO:0006368, GO:0016570, GO:0016593	0.807459	0.817918	Turquoise
TRINITY_DN95556_c0_g1	1.9626	0.538626	-0.339524	1	tr|I1J3L6|I1J3L6_BRADI	*-*	3-isopropylmalate dehydrogenase	IPR024084 (Isopropylmalate dehydrogenase-like domain)	GO:0000287, GO:0003862, GO:0005737, GO:0009082, GO:0009098, GO:0016616, GO:0046872, GO:0051287, GO:0055114	0.830029	0.815602	Turquoise
TRINITY_DN9543_c0_g1	-1.9968	0.143572	0.111169	1	NA	NA	NA	NA	NA	-0.814203	-0.806309	Turquoise
TRINITY_DN95384_c0_g1	6.62969	2.39e-05	0	1	NA	NA	Unknown protein	NA	NA	0.968636	0.957454	Turquoise
TRINITY_DN9519_c0_g1	1.36182	1	-1.34861	1	NA	NA	Unknown protein	NA	NA	0.839675	0.841094	Turquoise
TRINITY_DN9516_c0_g1	1.80313	1	-3.23806	0.340401	NA	NA	Unknown protein	NA	NA	0.87967	0.892092	Turquoise
TRINITY_DN95014_c0_g1	3.58551	0.0135138	1.15811	1	NA	NA	NA	NA	NA	0.888232	0.882426	Turquoise
TRINITY_DN94956_c0_g1	3.64734	0.00364666	-0.681534	1	NA	NA	NA	NA	NA	0.930724	0.911483	Turquoise
TRINITY_DN94903_c0_g2	1.70982	1	-3.19209	0.901754	NA	NA	Unknown protein	NA	NA	0.821971	0.809556	Turquoise
TRINITY_DN949_c1_g1	7.90681	0.0110636	4.07993	1	NA	NA	Unknown protein	NA	NA	0.937072	0.926668	Turquoise
TRINITY_DN9489_c0_g2	2.09284	0.791399	-0.222921	1	tr|A0A446RZ71|A0A446RZ71_TRITD	***	BED-type domain-containing protein	IPR003656 (Zinc finger, BED-type), IPR008906 (HAT, C-terminal dimerisation domain), IPR012337 (Ribonuclease H-like domain), IPR025525 (hAT-like transposase, RNase-H fold)	NA	0.906428	0.912227	Turquoise
TRINITY_DN94527_c0_g1	6.57898	0.000132318	2.04287	1	NA	NA	NA	NA	NA	0.922645	0.935903	Turquoise
TRINITY_DN942_c1_g1	2.93119	0.0525767	1.44573	1	NA	NA	Unknown protein	NA	NA	0.828613	0.851526	Turquoise
TRINITY_DN942_c0_g1	2.62826	1.34e-14	1.34273	0.966249	NA	NA	NA	NA	NA	0.939968	0.952158	Turquoise
TRINITY_DN94_c0_g2	0.615045	1	-0.216156	1	tr|M8AZR8|M8AZR8_AEGTA	***	Histone-lysine N-methyltransferase, H3 lysine-9 specific SUVH6	IPR001214 (SET domain), IPR003105 (SRA-YDG), IPR007728 (Pre-SET domain), IPR015947 (PUA-like domain), IPR025794 (Histone H3-K9 methyltransferase, plant)	GO:0005634, GO:0005694, GO:0008168, GO:0008270, GO:0016571, GO:0016740, GO:0018024, GO:0032259, GO:0034968	0.824064	0.826555	Turquoise
TRINITY_DN938_c2_g1	4.50872	0.00243732	2.56699	0.985519	NA	NA	Unknown protein	NA	NA	0.899006	0.905663	Turquoise
TRINITY_DN93714_c0_g1	5.86215	0.00455445	0	1	NA	NA	Unknown protein	NA	NA	0.876075	0.854594	Turquoise
TRINITY_DN93710_c0_g2	2.45118	0.62669	-0.105855	1	NA	NA	NA	NA	NA	0.896443	0.899846	Turquoise
TRINITY_DN93620_c0_g1	2.87474	3.9e-15	0.560858	1	tr|A0A2G3D4H8|A0A2G3D4H8_CAPCH	*-*	Chlorophyll a-b binding protein, chloroplastic	IPR022796 (Chlorophyll A-B binding protein), IPR023329 (Chlorophyll a/b binding protein domain)	GO:0003676, GO:0008270, GO:0009507, GO:0009522, GO:0009523, GO:0009535, GO:0009536, GO:0009579, GO:0009765, GO:0015979, GO:0016020, GO:0016021, GO:0016168, GO:0018298	0.967752	0.966306	Turquoise
TRINITY_DN9357_c0_g1	1.08052	1	-0.460108	1	tr|A0A059Q219|A0A059Q219_9POAL	***	Pentatricopeptide repeat-containing protein	IPR002885 (Pentatricopeptide repeat), IPR011990 (Tetratricopeptide-like helical domain)	NA	0.9576	0.948143	Turquoise
TRINITY_DN93328_c0_g1	3.61194	0.000831458	0.396333	1	tr|A0A446RSS3|A0A446RSS3_TRITD	***	Glycosyltransferase	IPR002213 (UDP-glucuronosyl/UDP-glucosyltransferase)	NA	0.841962	0.841214	Turquoise
TRINITY_DN93218_c0_g1	7.47695	9.05e-07	0.547816	1	tr|A0A0Q3L3V4|A0A0Q3L3V4_BRADI	*-*	Myb_DNA-bind_3 domain-containing protein	IPR024752 (Myb/SANT-like domain)	NA	0.801951	0.805679	Turquoise
TRINITY_DN92919_c0_g1	6.13339	0.0041819	4.02353	0.516995	tr|A0A3B6IW71|A0A3B6IW71_WHEAT	***	CCHC-type domain-containing protein	IPR001878 (Zinc finger, CCHC-type)	NA	0.807983	0.826147	Turquoise
TRINITY_DN9288_c0_g2	-2.71758	1.31e-06	-0.412093	1	tr|A0A287SYA1|A0A287SYA1_HORVV	***	MYND-type domain-containing protein	NA	GO:0046872	-0.858276	-0.853735	Turquoise
TRINITY_DN9278_c0_g2	2.05229	0.379637	0.971153	1	NA	NA	NA	NA	NA	0.818909	0.84043	Turquoise
TRINITY_DN9242_c0_g2	1.84981	0.240495	0.723004	1	NA	NA	NA	NA	NA	0.838341	0.854109	Turquoise
TRINITY_DN9229_c0_g1	2.60126	0.391359	1.0475	1	tr|C0PN20|C0PN20_MAIZE	***	Dimer_Tnp_hAT domain-containing protein	IPR008906 (HAT, C-terminal dimerisation domain), IPR012337 (Ribonuclease H-like domain)	GO:0046983	0.87531	0.886525	Turquoise
TRINITY_DN9217_c0_g1	-2.94776	3.67e-06	-0.244974	1	tr|Q0WYI6|Q0WYI6_WHEAT	***	Anthocyanidin synthase	IPR005123 (Oxoglutarate/iron-dependent dioxygenase), IPR026992 (Non-haem dioxygenase N-terminal domain), IPR027443 (Isopenicillin N synthase-like)	GO:0016491, GO:0046872, GO:0055114	-0.83951	-0.839658	Turquoise
TRINITY_DN920_c2_g1	2.84933	0.0137671	0.630664	1	NA	NA	Unknown protein	NA	NA	0.898683	0.910326	Turquoise
TRINITY_DN91897_c0_g1	2.54765	1.29e-05	0.791118	1	tr|B6UCS1|B6UCS1_MAIZE	*-*	Metalloendopeptidase	NA	GO:0006508, GO:0008233, GO:0008237, GO:0016020, GO:0016021	0.952148	0.949005	Turquoise
TRINITY_DN9181_c1_g2	2.6102	0.874073	-2.76308	1	NA	NA	NA	NA	NA	0.812347	0.812206	Turquoise
TRINITY_DN918_c6_g1	4.52362	0.266015	1.40343	1	NA	NA	NA	NA	NA	0.872366	0.889137	Turquoise
TRINITY_DN9156_c1_g1	-2.88818	0.00296892	0.497712	1	tr|A0A3B6TNE8|A0A3B6TNE8_WHEAT	***	CW-type domain-containing protein	IPR003594 (Histidine kinase-like ATPase, C-terminal domain), IPR011124 (Zinc finger, CW-type)	NA	-0.84941	-0.848639	Turquoise
TRINITY_DN9139_c0_g2	3.01998	0.0104869	0.507281	1	NA	NA	NA	NA	NA	0.965765	0.962344	Turquoise
TRINITY_DN9122_c0_g1	2.73967	0.0112755	1.68334	1	NA	NA	Unknown protein	NA	NA	0.845727	0.852058	Turquoise
TRINITY_DN9116_c1_g1	6.58963	0.000156572	3.54333	0.700393	NA	NA	NA	NA	NA	0.855996	0.859225	Turquoise
TRINITY_DN911_c2_g1	4.85928	4.5e-08	3.93205	0.000365332	NA	NA	NA	NA	NA	0.802649	0.816942	Turquoise
TRINITY_DN9106_c0_g2	1.55404	1	-0.882994	1	NA	NA	NA	NA	NA	0.830711	0.815049	Turquoise
TRINITY_DN9091_c0_g1	3.30039	0.0334961	1.55104	1	NA	NA	NA	NA	NA	0.884478	0.887925	Turquoise
TRINITY_DN907_c0_g5	3.48595	0.0275952	-3.79744	0.418965	NA	NA	NA	NA	NA	0.873919	0.872583	Turquoise
TRINITY_DN9061_c0_g1	2.52979	0.718011	0.849506	1	NA	NA	NA	NA	NA	0.80137	0.80679	Turquoise
TRINITY_DN9057_c0_g3	6.5168	0.00208607	2.86779	1	NA	NA	NA	NA	NA	0.878631	0.854134	Turquoise
TRINITY_DN9043_c0_g1	0.541567	1	-0.116177	1	tr|A0A2R6Q269|A0A2R6Q269_ACTCC	*-*	Heterogeneous nuclear ribonucleoprotein like	IPR012677 (Nucleotide-binding alpha-beta plait domain)	GO:0003676, GO:0003723	0.899545	0.890626	Turquoise
TRINITY_DN9040_c0_g1	0.273515	1	-0.117815	1	sp|B9GAG9|KTI12_ORYSJ	***	Protein KTI12 homolog	IPR013641 (Protein KTI12/L-seryl-tRNA(Sec) kinase), IPR027417 (P-loop containing nucleoside triphosphate hydrolase)	GO:0000166, GO:0005516, GO:0005524, GO:0005634, GO:0005737, GO:0006357, GO:0006400, GO:0008033, GO:0033588, GO:0080178	0.820454	0.810966	Turquoise
TRINITY_DN903_c0_g1	0.881757	1	-0.0129562	1	tr|M0Y0Z7|M0Y0Z7_HORVV	***	Auxin response factor	IPR010525 (Auxin response factor), IPR015300 (DNA-binding pseudobarrel domain)	GO:0003677, GO:0005634, GO:0006355, GO:0009725, GO:0009734	0.937687	0.922898	Turquoise
TRINITY_DN9023_c0_g3	2.98205	1	-0.464943	1	NA	NA	NA	NA	NA	0.872867	0.881082	Turquoise
TRINITY_DN900_c0_g1	1.00202	1	0.51352	1	tr|A0A3L6QKQ8|A0A3L6QKQ8_PANMI	***	Pentatricopeptide repeat-containing protein	IPR002885 (Pentatricopeptide repeat)	NA	0.800503	0.818102	Turquoise
TRINITY_DN9_c2_g1	11.1809	3.18e-10	9.46792	1.21e-06	tr|A0A2K2D6Q1|A0A2K2D6Q1_BRADI	*-*	Ig-like domain-containing protein	NA	GO:0005634, GO:0005737, GO:0061015	0.863111	0.85179	Turquoise
TRINITY_DN9_c1_g1	-4.62709	3.66e-11	0.0165527	1	NA	NA	Unknown protein	NA	NA	-0.836387	-0.835877	Turquoise
TRINITY_DN89534_c0_g1	4.32661	0.033553	0.413794	1	NA	NA	NA	NA	NA	0.878834	0.868545	Turquoise
TRINITY_DN8951_c0_g1	3.05763	0.222088	-1.57895	1	tr|A0A452ZFR0|A0A452ZFR0_AEGTS	***	TTF-type domain-containing protein	IPR008906 (HAT, C-terminal dimerisation domain), IPR012337 (Ribonuclease H-like domain), IPR025398 (Domain of unknown function DUF4371)	NA	0.966518	0.954566	Turquoise
TRINITY_DN89485_c0_g1	6.25177	0.000160918	0	1	NA	NA	NA	NA	NA	0.984131	0.98486	Turquoise
TRINITY_DN8947_c0_g1	1.93513	0.388349	0.665869	1	NA	NA	NA	NA	NA	0.831632	0.849135	Turquoise
TRINITY_DN8929_c0_g2	3.23127	0.415621	-3.22385	1	tr|B8BBX0|B8BBX0_ORYSI	***	Reverse transcriptase domain-containing protein	IPR000477 (Reverse transcriptase domain), IPR012337 (Ribonuclease H-like domain), IPR026960 (Reverse transcriptase zinc-binding domain)	GO:0003676, GO:0004523, GO:0090502	0.885505	0.894769	Turquoise
TRINITY_DN891_c0_g1	1.05648	1	-0.435118	1	NA	NA	Unknown protein	NA	NA	0.886275	0.886638	Turquoise
TRINITY_DN8907_c1_g1	1.43408	0.962789	0.22278	1	tr|T1LB20|T1LB20_TRIUA	***	NB-ARC domain-containing protein	IPR002182 (NB-ARC), IPR027417 (P-loop containing nucleoside triphosphate hydrolase)	GO:0043531	0.930066	0.936011	Turquoise
TRINITY_DN8897_c0_g3	2.82633	0.873271	1.32226	1	NA	NA	NA	NA	NA	0.877398	0.885529	Turquoise
TRINITY_DN8896_c1_g1	3.00579	0.121589	-1.22726	1	NA	NA	NA	NA	NA	0.88385	0.864721	Turquoise
TRINITY_DN88949_c0_g1	-1.71321	0.218371	-0.10637	1	tr|A0A453JZL6|A0A453JZL6_AEGTS	*-*	Hexosyltransferase	NA	NA	-0.833161	-0.845373	Turquoise
TRINITY_DN8882_c3_g1	1.79748	0.774854	-0.532916	1	NA	NA	NA	NA	NA	0.803014	0.828676	Turquoise
TRINITY_DN88753_c0_g1	1.77229	0.623094	-0.208037	1	NA	NA	NA	NA	NA	0.891448	0.87949	Turquoise
TRINITY_DN886_c0_g2	3.70558	0.551538	1.13567	1	NA	NA	NA	NA	NA	0.94351	0.947358	Turquoise
TRINITY_DN8858_c0_g6	1.62888	1	-0.0613302	1	NA	NA	NA	NA	NA	0.839064	0.838354	Turquoise
TRINITY_DN88413_c0_g1	5.28548	0.0026149	-1.16208	1	NA	NA	NA	NA	NA	0.965721	0.957687	Turquoise
TRINITY_DN8828_c0_g1	0.866158	1	0.28992	1	tr|A0A287XMK0|A0A287XMK0_HORVV	***	Ubiquitin-like domain-containing protein	IPR019956 (Ubiquitin), IPR029071 (Ubiquitin-related domain)	NA	0.842315	0.829206	Turquoise
TRINITY_DN8818_c0_g1	2.79709	0.000762217	0.506961	1	NA	NA	Unknown protein	NA	NA	0.964855	0.974159	Turquoise
TRINITY_DN8817_c1_g1	1.19082	1	0.296423	1	tr|G8DUR9|G8DUR9_9POAL	***	PISTILLATA-like MADS-box transcription factor	IPR002100 (Transcription factor, MADS-box), IPR002487 (Transcription factor, K-box)	GO:0000977, GO:0003677, GO:0003700, GO:0005634, GO:0006355, GO:0045944, GO:0046983	0.872944	0.867687	Turquoise
TRINITY_DN8805_c2_g1	-1.37203	0.807241	-0.0373021	1	NA	NA	Unknown protein	NA	NA	-0.909692	-0.894039	Turquoise
TRINITY_DN8792_c1_g1	0.975885	1	-0.788924	1	NA	NA	NA	NA	NA	0.837019	0.842311	Turquoise
TRINITY_DN8790_c0_g1	-7.50056	2.09e-23	-0.158999	1	tr|A0A453RWR9|A0A453RWR9_AEGTS	*-*	F-box domain-containing protein	IPR001810 (F-box domain)	NA	-0.899111	-0.893558	Turquoise
TRINITY_DN8787_c0_g1	7.91026	1.41e-08	6.82658	1.22e-05	NA	NA	Unknown protein	NA	NA	0.806182	0.817102	Turquoise
TRINITY_DN87854_c0_g1	2.12209	0.878485	-0.110843	1	tr|A0A453IPF2|A0A453IPF2_AEGTS	*-*	Retrotrans_gag domain-containing protein	IPR021109 (Aspartic peptidase domain)	NA	0.828899	0.838461	Turquoise
TRINITY_DN8775_c0_g1	0.487668	1	-0.434839	1	NA	NA	NA	NA	NA	0.814418	0.819825	Turquoise
TRINITY_DN8771_c0_g1	1.86074	1	-0.0436792	1	NA	NA	NA	NA	NA	0.826923	0.833512	Turquoise
TRINITY_DN8755_c0_g1	1.03235	1	-0.54009	1	tr|A0A3L6EH86|A0A3L6EH86_MAIZE	*-*	Protein ECERIFERUM 1	IPR021940 (Uncharacterised domain Wax2, C-terminal)	NA	0.800184	0.810623	Turquoise
TRINITY_DN87511_c0_g2	5.79225	0.000209844	4.00251	0.169881	NA	NA	NA	NA	NA	0.877515	0.862838	Turquoise
TRINITY_DN87434_c0_g1	0.51503	1	-0.0485628	1	NA	NA	Unknown protein	NA	NA	0.856135	0.858088	Turquoise
TRINITY_DN8741_c0_g1	1.01667	1	0.157392	1	tr|M8BUW2|M8BUW2_AEGTA	*-*	Disease resistance protein RPM1	IPR002182 (NB-ARC), IPR027417 (P-loop containing nucleoside triphosphate hydrolase)	GO:0043531	0.822716	0.826764	Turquoise
TRINITY_DN87198_c0_g2	-0.782559	1	-0.0967212	1	sp|Q6ZCC4|SDH6_ORYSJ	***	Succinate dehydrogenase subunit 6, mitochondrial	NA	GO:0005739, GO:0005743, GO:0005749, GO:0006099, GO:0016020, GO:0019867, GO:0045273	-0.919872	-0.915226	Turquoise
TRINITY_DN87125_c0_g1	2.89997	0.253682	-1.48075	1	NA	NA	NA	NA	NA	0.876023	0.881352	Turquoise
TRINITY_DN871_c1_g1	1.61046	0.490614	0.0659067	1	NA	NA	NA	NA	NA	0.901812	0.896741	Turquoise
TRINITY_DN8708_c0_g1	1.02982	1	0.370913	1	tr|A0A446PYF7|A0A446PYF7_TRITD	***	S4 RNA-binding domain-containing protein	IPR017506 (Photosystem II S4)	NA	0.906822	0.907738	Turquoise
TRINITY_DN87_c0_g2	3.49753	0.990114	-0.37894	1	NA	NA	Unknown protein	NA	NA	0.88746	0.887888	Turquoise
TRINITY_DN87_c0_g1	3.33492	0.0185861	0.640313	1	tr|A0A0D9WSH8|A0A0D9WSH8_9ORYZ	*-*	CUE domain-containing protein	NA	NA	0.914675	0.906435	Turquoise
TRINITY_DN8692_c0_g1	0.765181	1	-0.39084	1	tr|A0A287IX56|A0A287IX56_HORVV	***	C2 domain-containing protein	IPR000008 (C2 domain)	NA	0.832871	0.820893	Turquoise
TRINITY_DN86848_c0_g1	6.19897	1.84e-06	1.64418	1	tr|A0A446YN29|A0A446YN29_TRITD	*-*	Receptor-like serine/threonine-protein kinase	NA	NA	0.946763	0.934954	Turquoise
TRINITY_DN86784_c0_g1	1.59003	1	-0.938392	1	tr|A0A1D6ET16|A0A1D6ET16_MAIZE	***	Protein farnesyltransferase/geranylgeranyltransferase type-1 subunit alpha	NA	GO:0008318, GO:0016740, GO:0018342	0.847002	0.857779	Turquoise
TRINITY_DN864_c0_g1	-7.17203	5.36e-07	0.0574874	1	tr|A0A3L6TI11|A0A3L6TI11_PANMI	***	SH3 domain-containing protein C23A1.17-like	NA	NA	-0.829859	-0.822156	Turquoise
TRINITY_DN86387_c0_g1	2.63007	0.544453	-0.335327	1	tr|A0A200PMB4|A0A200PMB4_9MAGN	*-*	Mitochondrial carrier protein	IPR018108 (Mitochondrial substrate/solute carrier), IPR023395 (Mitochondrial carrier domain)	GO:0016020, GO:0016021, GO:0022857, GO:0055085	0.903772	0.89653	Turquoise
TRINITY_DN8636_c0_g1	3.98125	0.000128387	2.5969	0.306926	tr|A0A2X0SDY4|A0A2X0SDY4_WHEAT	*-*	RNase H domain-containing protein	NA	GO:0003676, GO:0004523, GO:0090502	0.906697	0.918777	Turquoise
TRINITY_DN8633_c1_g1	3.56171	0.154402	1.31697	1	NA	NA	Unknown protein	NA	NA	0.930456	0.930954	Turquoise
TRINITY_DN8624_c0_g2	2.71854	0.409095	0.187661	1	NA	NA	NA	NA	NA	0.942218	0.944837	Turquoise
TRINITY_DN8614_c0_g1	1.14784	1	0.485466	1	tr|A0A2S3ID63|A0A2S3ID63_9POAL	***	PDZ domain-containing protein	IPR001940 (Peptidase S1C), IPR009003 (Peptidase S1, PA clan)	GO:0004252, GO:0006508	0.835909	0.836611	Turquoise
TRINITY_DN86097_c0_g1	2.96722	0.516717	-0.829134	1	NA	NA	NA	NA	NA	0.892798	0.901243	Turquoise
TRINITY_DN8609_c1_g1	0.942099	1	0.0789885	1	NA	NA	NA	NA	NA	0.858488	0.879595	Turquoise
TRINITY_DN86070_c0_g1	6.57712	6.56e-05	0	1	NA	NA	NA	NA	NA	0.918024	0.916454	Turquoise
TRINITY_DN8597_c0_g1	0.536739	1	-0.0741625	1	sp|P30792|PMGI_MAIZE	*-*	2,3-bisphosphoglycerate-independent phosphoglycerate mutase	IPR017850 (Alkaline-phosphatase-like, core domain)	GO:0003824, GO:0004619, GO:0005737, GO:0006007, GO:0006096, GO:0016853, GO:0030145, GO:0044262, GO:0046537, GO:0046872	0.888605	0.891003	Turquoise
TRINITY_DN8585_c0_g1	0.884592	1	-0.610442	1	NA	NA	Unknown protein	NA	NA	0.872903	0.853805	Turquoise
TRINITY_DN85701_c0_g1	0.955938	1	-0.51749	1	NA	NA	NA	NA	NA	0.837414	0.820706	Turquoise
TRINITY_DN85445_c0_g1	1.94758	0.428223	-0.734044	1	tr|A0A287L486|A0A287L486_HORVV	*-*	Protein kinase domain-containing protein	IPR010632 (Domain of unknown function DUF1221)	GO:0004672, GO:0005524, GO:0006468	0.927653	0.917388	Turquoise
TRINITY_DN8541_c0_g1	3.19286	0.0761482	2.11726	1	NA	NA	Unknown protein	NA	NA	0.841618	0.857417	Turquoise
TRINITY_DN8532_c0_g2	0.418257	1	-0.0392899	1	tr|A0A1D5V0J3|A0A1D5V0J3_WHEAT	*-*	PPM-type phosphatase domain-containing protein	IPR001932 (PPM-type phosphatase domain), IPR015655 (Protein phosphatase 2C family)	GO:0003824, GO:0004722, GO:0006470	0.841993	0.819782	Turquoise
TRINITY_DN8529_c0_g1	2.68531	0.344042	0.254907	1	tr|A0A368QE97|A0A368QE97_SETIT	***	DUF4220 domain-containing protein	IPR007658 (Protein of unknown function DUF594), IPR025315 (Domain of unknown function DUF4220)	NA	0.872331	0.889081	Turquoise
TRINITY_DN852_c1_g1	1.65157	1	-0.0312649	1	tr|A0A291B5C4|A0A291B5C4_TRITD	***	CNL1	IPR002182 (NB-ARC), IPR011009 (Protein kinase-like domain), IPR027417 (P-loop containing nucleoside triphosphate hydrolase)	GO:0043531	0.852849	0.852373	Turquoise
TRINITY_DN85156_c0_g1	4.84573	0.0136242	0.537238	1	NA	NA	NA	NA	NA	0.948371	0.949579	Turquoise
TRINITY_DN8500_c0_g3	4.24657	0.119019	2.44576	1	tr|T1M4K0|T1M4K0_TRIUA	***	Reverse transcriptase domain-containing protein	IPR000477 (Reverse transcriptase domain)	NA	0.790207	0.801943	Turquoise
TRINITY_DN849_c0_g1	0.828486	1	-0.373204	1	tr|A0A287Q003|A0A287Q003_HORVV	***	NB-ARC domain-containing protein	IPR032675 (Leucine-rich repeat domain, L domain-like)	GO:0043531	0.807414	0.810792	Turquoise
TRINITY_DN8479_c1_g3	5.10221	0.00255806	0.948897	1	NA	NA	Unknown protein	IPR004312 (Arabidopsis retrotransposon Orf1)	NA	0.820402	0.816663	Turquoise
TRINITY_DN84664_c0_g1	5.95454	0.000669724	1.83525	1	NA	NA	Unknown protein	NA	NA	0.907193	0.910249	Turquoise
TRINITY_DN8465_c1_g1	3.34155	0.00419965	0.116988	1	NA	NA	NA	NA	NA	0.964031	0.966243	Turquoise
TRINITY_DN8455_c2_g1	-6.77512	6.56e-09	0.0135307	1	NA	NA	NA	NA	NA	-0.968759	-0.970973	Turquoise
TRINITY_DN8448_c0_g1	0.492857	1	-0.102796	1	tr|A0A446R3C0|A0A446R3C0_TRITD	***	J domain-containing protein	IPR001623 (DnaJ domain)	NA	0.813194	0.828645	Turquoise
TRINITY_DN84479_c0_g1	2.52217	0.431622	-1.22225	1	NA	NA	NA	NA	NA	0.838167	0.817083	Turquoise
TRINITY_DN8440_c1_g1	2.70264	0.574617	-2.41544	1	NA	NA	NA	NA	NA	0.826464	0.842451	Turquoise
TRINITY_DN8433_c0_g2	1.59276	0.623094	-0.06929	1	NA	NA	Unknown protein	NA	NA	0.826141	0.81481	Turquoise
TRINITY_DN8420_c0_g1	0.451523	1	0.193805	1	tr|A0A0E0A5Q9|A0A0E0A5Q9_9ORYZ	*-*	AAA domain-containing protein	IPR003959 (ATPase, AAA-type, core), IPR027417 (P-loop containing nucleoside triphosphate hydrolase)	GO:0000166, GO:0005524, GO:0005737, GO:0016787, GO:0030163, GO:0036402, GO:1901800	0.817081	0.842858	Turquoise
TRINITY_DN84137_c0_g1	3.05401	0.0205053	1.11664	1	tr|A0A3L6DFV7|A0A3L6DFV7_MAIZE	*-*	Protein NRT1/ PTR FAMILY 3.1	IPR000109 (Proton-dependent oligopeptide transporter family)	NA	0.85543	0.851618	Turquoise
TRINITY_DN8405_c0_g1	0.993967	1	0.0396715	1	tr|A0A2G3D4H8|A0A2G3D4H8_CAPCH	*-*	Chlorophyll a-b binding protein, chloroplastic	IPR022796 (Chlorophyll A-B binding protein), IPR023329 (Chlorophyll a/b binding protein domain)	GO:0003676, GO:0008270, GO:0009507, GO:0009522, GO:0009523, GO:0009535, GO:0009536, GO:0009579, GO:0009765, GO:0015979, GO:0016020, GO:0016021, GO:0016168, GO:0018298	0.914699	0.913986	Turquoise
TRINITY_DN8394_c0_g1	1.5529	1	-0.0152366	1	NA	NA	NA	NA	NA	0.846686	0.846914	Turquoise
TRINITY_DN83640_c2_g1	2.61732	0.397294	-1.69537	1	NA	NA	NA	NA	NA	0.924034	0.928443	Turquoise
TRINITY_DN8363_c0_g1	3.44807	0.124432	-1.95916	1	tr|M8AWV3|M8AWV3_AEGTA	*-*	ABC transporter C family member 3	IPR011527 (ABC transporter type 1, transmembrane domain)	GO:0000166, GO:0005524, GO:0016020, GO:0016021, GO:0016887, GO:0042626, GO:0055085	0.816737	0.832811	Turquoise
TRINITY_DN8361_c0_g2	1.25088	1	0.0187609	1	NA	NA	NA	NA	NA	0.831351	0.841986	Turquoise
TRINITY_DN8361_c0_g1	1.06268	1	-0.0160033	1	tr|A0A287LYW4|A0A287LYW4_HORVV	***	PMEI domain-containing protein	IPR006501 (Pectinesterase inhibitor domain)	GO:0004857, GO:0043086	0.792297	0.809075	Turquoise
TRINITY_DN8355_c0_g1	0.824468	1	-0.191282	1	tr|A0A199UMQ1|A0A199UMQ1_ANACO	***	Zinc finger protein GIS2	IPR001878 (Zinc finger, CCHC-type)	GO:0003676, GO:0008270	0.879609	0.890024	Turquoise
TRINITY_DN83309_c0_g1	2.07402	NA	-0.557697	NA	tr|A0A059Q2X1|A0A059Q2X1_9POAL	*-*	Abscisic stress ripening protein	IPR003496 (ABA/WDS induced protein)	NA	0.81924	0.80711	Turquoise
TRINITY_DN832_c0_g1	0.859619	1	-0.120098	1	tr|A0A453BYV9|A0A453BYV9_AEGTS	***	PAP_fibrillin domain-containing protein	IPR006843 (Plastid lipid-associated protein/fibrillin conserved domain)	NA	0.934134	0.928445	Turquoise
TRINITY_DN8318_c0_g1	0.689363	1	-0.0488935	1	tr|A0A287RKM9|A0A287RKM9_HORVV	***	RING-CH-type domain-containing protein	IPR013083 (Zinc finger, RING/FYVE/PHD-type), IPR033275 (E3 ubiquitin-protein ligase MARCH-like)	GO:0008270, GO:0016020, GO:0016021, GO:0046872	0.916387	0.918239	Turquoise
TRINITY_DN8314_c0_g1	5.55723	7.88e-06	2.46216	1	NA	NA	NA	NA	NA	0.884292	0.895832	Turquoise
TRINITY_DN83120_c0_g1	-1.36852	0.972264	0.0418288	1	NA	NA	NA	NA	NA	-0.844664	-0.841567	Turquoise
TRINITY_DN8303_c2_g2	8.16259	2.26e-09	0	1	NA	NA	NA	NA	NA	0.900797	0.90922	Turquoise
TRINITY_DN8292_c0_g1	1.56411	0.256431	0.297773	1	tr|A0A2K2CYA6|A0A2K2CYA6_BRADI	***	Protein kinase domain-containing protein	IPR001611 (Leucine-rich repeat), IPR003591 (Leucine-rich repeat, typical subtype), IPR011009 (Protein kinase-like domain), IPR013320 (Concanavalin A-like lectin/glucanase domain), IPR032675 (Leucine-rich repeat domain, L domain-like)	GO:0004672, GO:0005524, GO:0006468, GO:0016020, GO:0016021	0.813266	0.82578	Turquoise
TRINITY_DN8280_c3_g1	3.34822	0.0346602	1.25859	1	tr|A0A3B6HU92|A0A3B6HU92_WHEAT	***	RNA-dependent RNA polymerase	IPR007855 (RNA-dependent RNA polymerase, eukaryotic-type), IPR012677 (Nucleotide-binding alpha-beta plait domain)	NA	0.935002	0.941021	Turquoise
TRINITY_DN8245_c1_g1	1.41931	1	-0.434039	1	tr|M8CIM7|M8CIM7_AEGTA	***	CaM_binding domain-containing protein	IPR012417 (Calmodulin-binding domain, plant)	GO:0005516	0.880677	0.88117	Turquoise
TRINITY_DN8241_c0_g1	-1.03538	1	0.0755896	1	AT4G36020.1	*-*	cold shock domain protein 1	IPR001878 (Zinc finger, CCHC-type)	NA	-0.903796	-0.903872	Turquoise
TRINITY_DN8236_c1_g1	3.57363	0.11968	0.542643	1	NA	NA	Unknown protein	NA	NA	0.956909	0.964353	Turquoise
TRINITY_DN8229_c0_g2	8.31799	1.1e-09	0	1	NA	NA	NA	NA	NA	0.896028	0.884523	Turquoise
TRINITY_DN8218_c0_g1	1.13246	1	-0.00115097	1	tr|A0A0E0MNZ8|A0A0E0MNZ8_ORYPU	*-*	C2H2-type domain-containing protein	NA	GO:0003676	0.863016	0.878006	Turquoise
TRINITY_DN8209_c0_g2	5.63506	4.98e-06	3.80733	0.0687438	NA	NA	NA	NA	NA	0.915467	0.920345	Turquoise
TRINITY_DN819_c2_g1	2.93848	0.343414	1.35863	1	NA	NA	Unknown protein	NA	NA	0.799186	0.802818	Turquoise
TRINITY_DN81896_c0_g2	1.4039	1	-3.01505	0.833405	NA	NA	NA	NA	NA	0.798002	0.802564	Turquoise
TRINITY_DN81853_c0_g1	5.81437	0.00346122	1.13712	1	NA	NA	NA	NA	NA	0.823823	0.818105	Turquoise
TRINITY_DN8172_c0_g2	1.80182	0.452276	-0.247867	1	NA	NA	NA	NA	NA	0.892113	0.896428	Turquoise
TRINITY_DN8165_c0_g1	0.78829	1	-0.422875	1	tr|I1IYL4|I1IYL4_BRADI	*-*	Peroxidase	IPR010255 (Haem peroxidase)	GO:0004601, GO:0005576, GO:0006979, GO:0016491, GO:0020037, GO:0042744, GO:0046872, GO:0055114, GO:0098869	0.883253	0.868183	Turquoise
TRINITY_DN8141_c1_g1	3.04453	0.867199	-8.20517	0.00661001	NA	NA	Unknown protein	NA	NA	0.859739	0.868637	Turquoise
TRINITY_DN814_c0_g1	5.38383	0.0147229	4.06689	0.392154	tr|B8B5M4|B8B5M4_ORYSI	*-*	Superoxide dismutase [Cu-Zn]	IPR009003 (Peptidase S1, PA clan)	GO:0004784, GO:0006801, GO:0016491, GO:0019430, GO:0046872, GO:0055114	0.894602	0.903335	Turquoise
TRINITY_DN8134_c1_g1	-3.14176	8.34e-10	-0.493117	1	NA	NA	Unknown protein	NA	NA	-0.920152	-0.917559	Turquoise
TRINITY_DN8132_c0_g1	1.0724	1	-0.109729	1	NA	NA	NA	NA	NA	0.868521	0.88576	Turquoise
TRINITY_DN81165_c0_g1	1.75401	1	-1.09486	1	NA	NA	NA	NA	NA	0.832355	0.8283	Turquoise
TRINITY_DN81075_c0_g2	1.52061	0.170014	-0.518436	1	tr|A0A3S3NTC0|A0A3S3NTC0_9MAGN	*-*	Retinoic acid-induced 3	IPR005358 (Putative zinc- or iron-chelating domain containing protein)	NA	0.948971	0.932447	Turquoise
TRINITY_DN81_c0_g3	2.25498	1	-1.12065	1	tr|A0A446WAY7|A0A446WAY7_TRITD	*-*	Protein kinase domain-containing protein	IPR011009 (Protein kinase-like domain)	NA	0.922669	0.922606	Turquoise
TRINITY_DN8097_c0_g2	1.29628	1	-2.0888	1	NA	NA	Unknown protein	NA	NA	0.85013	0.856705	Turquoise
TRINITY_DN80840_c0_g1	8.77625	8.05e-12	0	1	NA	NA	NA	NA	NA	0.933717	0.933546	Turquoise
TRINITY_DN807_c1_g1	4.00684	0.000758169	-0.885158	1	tr|A0A3B5ZP10|A0A3B5ZP10_WHEAT	***	Peptidase S59 domain-containing protein	IPR007230 (Peptidase S59, nucleoporin)	NA	0.83245	0.84434	Turquoise
TRINITY_DN807_c0_g1	0.488759	1	-0.13018	1	tr|A0A1E5WBK7|A0A1E5WBK7_9POAL	***	Photosystem I subunit O	IPR017498 (Photosystem I PsaO)	GO:0016020, GO:0016021	0.873886	0.867063	Turquoise
TRINITY_DN8067_c0_g1	1.92622	0.0947342	0.067463	1	NA	NA	NA	NA	NA	0.960542	0.955325	Turquoise
TRINITY_DN8052_c0_g1	2.01357	0.924679	-3.41113	0.49973	NA	NA	Unknown protein	NA	NA	0.851517	0.848166	Turquoise
TRINITY_DN80400_c0_g1	5.56994	0.00210389	3.23398	0.856554	tr|M8CGT1|M8CGT1_AEGTA	*-*	F-box domain-containing protein	IPR001810 (F-box domain)	NA	0.802189	0.826037	Turquoise
TRINITY_DN8027_c0_g2	0.520948	1	-0.169456	1	tr|B6UEX0|B6UEX0_MAIZE	***	3-oxoacyl-reductase	IPR002347 (Short-chain dehydrogenase/reductase SDR)	NA	0.80202	0.801449	Turquoise
TRINITY_DN79951_c0_g1	6.89254	1.25e-05	-0.59462	1	NA	NA	Unknown protein	NA	NA	0.829514	0.838516	Turquoise
TRINITY_DN7993_c0_g2	0.347442	1	0.0269551	1	tr|I1HXG9|I1HXG9_BRADI	***	Non-specific serine/threonine protein kinase	IPR020636 (Calcium/calmodulin-dependent/calcium-dependent protein kinase), IPR028375 (KA1 domain/Ssp2, C-terminal)	GO:0000166, GO:0004672, GO:0004674, GO:0005524, GO:0006468, GO:0007165, GO:0016020, GO:0016021, GO:0016301, GO:0016310, GO:0016740	0.800877	0.809714	Turquoise
TRINITY_DN79853_c0_g1	3.99515	0.0146604	0.810012	1	NA	NA	Unknown protein	NA	NA	0.799403	0.804106	Turquoise
TRINITY_DN79839_c0_g1	2.52368	0.162649	1.13426	1	NA	NA	Unknown protein	NA	NA	0.826395	0.839658	Turquoise
TRINITY_DN79809_c0_g3	1.60178	0.922192	-0.601976	1	NA	NA	NA	NA	NA	0.883084	0.881372	Turquoise
TRINITY_DN79619_c0_g1	1.75273	1	-4.62811	0.106888	tr|A0A1E5W272|A0A1E5W272_9POAL	***	zf-RVT domain-containing protein	IPR026960 (Reverse transcriptase zinc-binding domain)	NA	0.818631	0.829862	Turquoise
TRINITY_DN79601_c0_g1	7.11239	2.96e-07	-0.627013	1	NA	NA	NA	NA	NA	0.973835	0.96431	Turquoise
TRINITY_DN79532_c0_g1	5.81845	8.31e-06	3.3034	0.29732	NA	NA	NA	NA	NA	0.955175	0.960529	Turquoise
TRINITY_DN79329_c0_g3	2.27987	0.352362	0.33696	1	tr|A0A446WMS6|A0A446WMS6_TRITD	***	WAT1-related protein	IPR000620 (EamA domain), IPR030184 (WAT1-related protein)	NA	0.804523	0.820609	Turquoise
TRINITY_DN7932_c3_g1	3.00562	0.19383	0.39948	1	NA	NA	NA	NA	NA	0.879768	0.894151	Turquoise
TRINITY_DN7913_c0_g2	-1.77797	0.0494277	0.142074	1	tr|A0A072VB13|A0A072VB13_MEDTR	*-*	DUF868 family protein	IPR008586 (Protein of unknown function DUF868, plant)	NA	-0.920797	-0.925627	Turquoise
TRINITY_DN7913_c0_g1	-1.36847	0.363551	0.10288	1	tr|A0A5A7VBF6|A0A5A7VBF6_CUCME	***	DUF868 family protein	IPR008586 (Protein of unknown function DUF868, plant)	NA	-0.964413	-0.957117	Turquoise
TRINITY_DN7893_c0_g3	3.84459	0.458021	1.36568	1	NA	NA	NA	NA	NA	0.86427	0.862409	Turquoise
TRINITY_DN78870_c0_g1	1.54694	0.859595	0.165276	1	tr|A0A287XRX1|A0A287XRX1_HORVV	***	Peptidase A1 domain-containing protein	IPR001461 (Aspartic peptidase A1 family), IPR021109 (Aspartic peptidase domain), IPR032861 (Xylanase inhibitor, N-terminal)	GO:0004190, GO:0006508, GO:0008233, GO:0016787	0.855013	0.860582	Turquoise
TRINITY_DN7887_c0_g1	9.08937	0.000817036	3.85047	1	NA	NA	NA	NA	NA	0.976061	0.97264	Turquoise
TRINITY_DN7875_c0_g1	-1.01941	1	0.372575	1	tr|A0A0E0MAW4|A0A0E0MAW4_ORYPU	*-*	RING-type domain-containing protein	NA	GO:0016020, GO:0016021	-0.827559	-0.816588	Turquoise
TRINITY_DN78736_c0_g1	-2.5597	0.007459	-0.733317	1	NA	NA	NA	NA	NA	-0.807336	-0.824201	Turquoise
TRINITY_DN7868_c0_g1	2.50445	0.410005	-0.480314	1	NA	NA	NA	NA	NA	0.931425	0.925499	Turquoise
TRINITY_DN78669_c0_g1	1.10699	1	-2.14044	0.637076	NA	NA	NA	NA	NA	0.860129	0.847556	Turquoise
TRINITY_DN7862_c0_g1	10.2201	4.95e-19	0.558613	1	tr|I1HZC7|I1HZC7_BRADI	*-*	BTB domain-containing protein	NA	GO:0005634, GO:0010114	0.966964	0.974816	Turquoise
TRINITY_DN78602_c0_g1	-7.37311	4.47e-08	0.179078	1	NA	NA	NA	NA	NA	-0.859925	-0.859594	Turquoise
TRINITY_DN7858_c0_g2	1.46038	1	-2.39862	0.409608	tr|M8CQ89|M8CQ89_AEGTA	*-*	ABC transporter C family member 4	IPR003439 (ABC transporter-like), IPR027417 (P-loop containing nucleoside triphosphate hydrolase)	GO:0000166, GO:0005524, GO:0016020, GO:0016021, GO:0016887, GO:0042626, GO:0055085	0.872386	0.864943	Turquoise
TRINITY_DN7858_c0_g1	1.40776	0.911264	0.278805	1	tr|A0A1D6J4B8|A0A1D6J4B8_MAIZE	***	ABC transporter C family member 4	IPR003439 (ABC transporter-like), IPR011527 (ABC transporter type 1, transmembrane domain), IPR027417 (P-loop containing nucleoside triphosphate hydrolase)	GO:0000166, GO:0000325, GO:0005524, GO:0005774, GO:0016020, GO:0016021, GO:0016887, GO:0042626, GO:0055085	0.857752	0.851545	Turquoise
TRINITY_DN7856_c1_g2	-1.22555	1	0.280574	1	NA	NA	Unknown protein	NA	NA	-0.868536	-0.86093	Turquoise
TRINITY_DN7854_c0_g1	0.862479	1	-0.286887	1	tr|A0A072VSU0|A0A072VSU0_MEDTR	***	ABC transporter B family protein	IPR003439 (ABC transporter-like), IPR011527 (ABC transporter type 1, transmembrane domain), IPR027417 (P-loop containing nucleoside triphosphate hydrolase)	GO:0000166, GO:0005524, GO:0016020, GO:0016021, GO:0016887, GO:0042626, GO:0055085	0.856565	0.860451	Turquoise
TRINITY_DN7843_c0_g3	2.3146	0.0899959	-0.575779	1	tr|A0A446YV08|A0A446YV08_TRITD	*-*	Peptidase A1 domain-containing protein	IPR001461 (Aspartic peptidase A1 family), IPR021109 (Aspartic peptidase domain), IPR032799 (Xylanase inhibitor, C-terminal)	NA	0.961038	0.963071	Turquoise
TRINITY_DN78362_c0_g1	8.26909	2.42e-09	0	1	NA	NA	Unknown protein	NA	NA	0.8764	0.895607	Turquoise
TRINITY_DN7825_c0_g2	4.24392	0.153837	0.0196728	1	NA	NA	NA	NA	NA	0.807752	0.80631	Turquoise
TRINITY_DN78221_c0_g1	2.33478	0.147158	-1.67776	1	NA	NA	NA	NA	NA	0.852631	0.84403	Turquoise
TRINITY_DN7821_c0_g3	1.10159	1	0.235556	1	NA	NA	NA	NA	NA	0.825774	0.820712	Turquoise
TRINITY_DN7821_c0_g2	2.97052	0.0330011	-0.783878	1	NA	NA	NA	NA	NA	0.946208	0.949596	Turquoise
TRINITY_DN7821_c0_g1	0.764898	1	0.145072	1	tr|A0A453MV63|A0A453MV63_AEGTS	***	F-box domain-containing protein	IPR001810 (F-box domain), IPR015916 (Galactose oxidase, beta-propeller)	NA	0.882177	0.890495	Turquoise
TRINITY_DN7807_c0_g1	6.29397	2.91e-07	3.46724	0.186366	NA	NA	Unknown protein	NA	NA	0.964226	0.971191	Turquoise
TRINITY_DN7803_c0_g1	3.16794	0.00329361	-0.104126	1	NA	NA	Unknown protein	NA	NA	0.933198	0.927297	Turquoise
TRINITY_DN78_c1_g1	0.639594	1	0.181094	1	tr|B7FJ16|B7FJ16_MEDTR	***	Oxygen-evolving enhancer protein 2	IPR002683 (PsbP family)	GO:0005509, GO:0009523, GO:0009654, GO:0015979, GO:0019898	0.892848	0.894269	Turquoise
TRINITY_DN77943_c0_g1	5.75293	0.00482419	2.6665	1	NA	NA	Unknown protein	NA	NA	0.902224	0.886145	Turquoise
TRINITY_DN77785_c0_g3	3.31518	0.0769845	-0.865634	1	tr|A0A2U1PV21|A0A2U1PV21_ARTAN	***	Retrovirus-related Pol polyprotein from transposon TNT 1-94	IPR013103 (Reverse transcriptase, RNA-dependent DNA polymerase)	GO:0000943, GO:0003676, GO:0015074	0.960395	0.9542	Turquoise
TRINITY_DN77682_c0_g1	10.4356	5.11e-12	8.4911	4.66e-07	NA	NA	NA	NA	NA	0.849779	0.844548	Turquoise
TRINITY_DN77675_c0_g1	4.11966	0.0286521	2.69575	1	NA	NA	NA	NA	NA	0.784482	0.800166	Turquoise
TRINITY_DN7761_c5_g1	1.11708	1	-0.600324	1	NA	NA	NA	NA	NA	0.871307	0.87521	Turquoise
TRINITY_DN7755_c0_g2	7.36057	1.61e-07	0	1	NA	NA	Unknown protein	NA	NA	0.976899	0.964138	Turquoise
TRINITY_DN77546_c0_g2	6.40227	0.000248799	0	1	NA	NA	NA	NA	NA	0.853758	0.850161	Turquoise
TRINITY_DN7753_c0_g1	4.36668	0.386782	-1.08726	1	NA	NA	NA	NA	NA	0.952259	0.955142	Turquoise
TRINITY_DN77513_c6_g1	7.87539	6.35e-09	0	1	tr|A0A1D6QRP9|A0A1D6QRP9_MAIZE	*-*	Reverse transcriptase domain-containing protein	NA	NA	0.947394	0.943825	Turquoise
TRINITY_DN77513_c0_g1	7.66945	4.94e-09	-0.594354	1	tr|A0A446NHS5|A0A446NHS5_TRITD	*-*	Retrotrans_gag domain-containing protein	IPR005162 (Retrotransposon gag domain)	NA	0.981211	0.969513	Turquoise
TRINITY_DN77492_c0_g5	6.99004	1.31e-06	-0.0170665	1	NA	NA	NA	NA	NA	0.930974	0.938097	Turquoise
TRINITY_DN7736_c0_g1	3.45541	0.0317013	0.935054	1	NA	NA	NA	NA	NA	0.878811	0.872785	Turquoise
TRINITY_DN77346_c0_g2	3.16095	0.231437	0.902784	1	NA	NA	Unknown protein	NA	NA	0.792276	0.803652	Turquoise
TRINITY_DN77035_c0_g2	5.79656	0.00369724	0	1	NA	NA	Unknown protein	NA	NA	0.846713	0.867065	Turquoise
TRINITY_DN77_c7_g1	3.78468	0.994563	0.289923	1	NA	NA	NA	NA	NA	0.862926	0.865238	Turquoise
TRINITY_DN77_c5_g1	4.89909	0.000295532	-4.77156	0.0251728	NA	NA	NA	NA	NA	0.975145	0.975214	Turquoise
TRINITY_DN77_c4_g1	1.38471	1	-0.498669	1	NA	NA	NA	NA	NA	0.844477	0.852885	Turquoise
TRINITY_DN77_c0_g2	0.821407	1	0.213879	1	NA	NA	NA	NA	NA	0.887983	0.905389	Turquoise
TRINITY_DN7699_c1_g1	1.02839	1	-0.114705	1	NA	NA	NA	NA	NA	0.879207	0.872911	Turquoise
TRINITY_DN76986_c2_g1	6.62583	2.95e-05	0	1	NA	NA	Unknown protein	NA	NA	0.958259	0.952435	Turquoise
TRINITY_DN76901_c0_g1	2.34167	0.842434	-2.70576	1	NA	NA	Unknown protein	NA	NA	0.872417	0.868639	Turquoise
TRINITY_DN76825_c0_g2	1.72218	0.736958	-1.20444	1	tr|A0A0E0AJP4|A0A0E0AJP4_9ORYZ	***	NB-ARC domain-containing protein	IPR002182 (NB-ARC), IPR027417 (P-loop containing nucleoside triphosphate hydrolase), IPR032675 (Leucine-rich repeat domain, L domain-like)	GO:0016020, GO:0016021, GO:0043531	0.923122	0.910461	Turquoise
TRINITY_DN7676_c0_g1	3.05863	0.00277581	1.25842	1	NA	NA	Unknown protein	NA	NA	0.849262	0.843225	Turquoise
TRINITY_DN7675_c0_g1	1.45539	0.760298	-0.408059	1	NA	NA	NA	NA	NA	0.940528	0.93606	Turquoise
TRINITY_DN7662_c3_g1	6.33706	0.000344523	0.563745	1	NA	NA	Unknown protein	NA	NA	0.846294	0.857805	Turquoise
TRINITY_DN766_c1_g1	1.01548	1	-1.15056	1	NA	NA	NA	NA	NA	0.819124	0.822088	Turquoise
TRINITY_DN76583_c0_g1	2.06744	0.492056	0.143458	1	NA	NA	NA	NA	NA	0.913013	0.915008	Turquoise
TRINITY_DN76540_c0_g2	3.51999	0.0269765	-0.0168385	1	NA	NA	NA	NA	NA	0.951969	0.942088	Turquoise
TRINITY_DN7647_c0_g1	2.87009	0.0590399	1.25671	1	tr|A0A1D6GHM6|A0A1D6GHM6_MAIZE	*-*	Acyl-CoA N-acyltransferase with RING/FYVE/PHD-type zinc finger protein	NA	GO:0016740, GO:0016746, GO:0046872	0.860281	0.852526	Turquoise
TRINITY_DN764_c0_g1	2.48224	1	-0.696615	1	NA	NA	NA	NA	NA	0.942589	0.940347	Turquoise
TRINITY_DN76303_c0_g1	2.30972	1	0.238769	1	NA	NA	NA	NA	NA	0.879115	0.875187	Turquoise
TRINITY_DN7617_c1_g1	1.97531	0.093626	0.187122	1	tr|B4FH48|B4FH48_MAIZE	***	Mitochondrial transcription termination factor family protein	IPR003690 (Transcription termination factor, mitochondrial/chloroplastic)	GO:0003690, GO:0006355, GO:0009507, GO:0009658, GO:0032502	0.926919	0.934725	Turquoise
TRINITY_DN76139_c1_g1	6.47947	6.34e-05	1.13799	1	NA	NA	NA	NA	NA	0.914907	0.931246	Turquoise
TRINITY_DN76049_c0_g1	4.43691	0.00151785	2.28648	1	tr|A0A3B6H0T4|A0A3B6H0T4_WHEAT	***	F-box domain-containing protein	IPR001810 (F-box domain), IPR017451 (F-box associated interaction domain)	NA	0.868431	0.859747	Turquoise
TRINITY_DN7591_c0_g1	1.26053	1	-0.949823	1	NA	NA	NA	NA	NA	0.866116	0.852399	Turquoise
TRINITY_DN758_c1_g1	4.38396	4.88e-05	-3.5679	0.478299	NA	NA	NA	NA	NA	0.887438	0.881607	Turquoise
TRINITY_DN75650_c0_g1	6.79071	1.08e-05	0	1	NA	NA	NA	NA	NA	0.958258	0.963951	Turquoise
TRINITY_DN7555_c0_g1	1.66363	1	-0.151078	1	tr|A0A1E5UWK2|A0A1E5UWK2_9POAL	*-*	Pentatricopeptide repeat-containing protein	NA	NA	0.816755	0.814666	Turquoise
TRINITY_DN7553_c0_g2	8.5786	2.95e-05	4.52343	0.425596	tr|A0A2S3IH40|A0A2S3IH40_9POAL	*-*	Thioredoxin	IPR012336 (Thioredoxin-like fold)	GO:0005623, GO:0006662, GO:0015035, GO:0045454, GO:0055114	0.952957	0.960568	Turquoise
TRINITY_DN7550_c0_g1	0.423609	1	0.0447762	1	tr|A0A1D6FKQ9|A0A1D6FKQ9_MAIZE	*-*	Protein SUPPRESSOR OF PHYA-105 1	IPR011009 (Protein kinase-like domain)	NA	0.796579	0.808052	Turquoise
TRINITY_DN7544_c0_g1	2.17123	0.150108	0.456746	1	NA	NA	NA	NA	NA	0.871453	0.866341	Turquoise
TRINITY_DN7540_c2_g3	2.7654	0.0771473	-0.477266	1	NA	NA	NA	NA	NA	0.963965	0.960355	Turquoise
TRINITY_DN7540_c2_g2	2.20257	0.922225	-0.779968	1	NA	NA	NA	NA	NA	0.834123	0.834814	Turquoise
TRINITY_DN7540_c2_g1	7.55953	1.35e-07	0.525919	1	NA	NA	NA	NA	NA	0.918884	0.929984	Turquoise
TRINITY_DN75296_c1_g1	4.75709	0.0197698	0.564352	1	NA	NA	Unknown protein	NA	NA	0.855034	0.877792	Turquoise
TRINITY_DN7517_c0_g1	0.959383	1	-0.215517	1	tr|A0A3B5Y639|A0A3B5Y639_WHEAT	***	F-box domain-containing protein	IPR001810 (F-box domain), IPR032675 (Leucine-rich repeat domain, L domain-like)	NA	0.835813	0.834537	Turquoise
TRINITY_DN7508_c0_g1	0.446881	1	0.150483	1	tr|A0A3B6HW63|A0A3B6HW63_WHEAT	***	Protein kinase domain-containing protein	IPR011009 (Protein kinase-like domain)	NA	0.808277	0.813771	Turquoise
TRINITY_DN7503_c0_g1	-0.638924	1	-0.0955757	1	tr|A0A0Q3F802|A0A0Q3F802_BRADI	*-*	Reticulon-like protein	IPR003388 (Reticulon)	GO:0005783, GO:0005789, GO:0016020, GO:0016021	-0.870607	-0.859733	Turquoise
TRINITY_DN74904_c0_g6	7.65957	2e-08	1.1368	1	NA	NA	NA	NA	NA	0.970535	0.963718	Turquoise
TRINITY_DN749_c0_g1	1.18367	1	0.378204	1	tr|A0A4D6KZL0|A0A4D6KZL0_VIGUN	***	Polyamine-modulated factor 1/Kinetochore protein NNF1	IPR007128 (Polyamine-modulated factor 1/Kinetochore protein NNF1)	NA	0.873631	0.890156	Turquoise
TRINITY_DN74863_c0_g1	4.93603	0.0110521	0.968905	1	NA	NA	NA	NA	NA	0.953383	0.949561	Turquoise
TRINITY_DN7480_c0_g1	0.752495	1	-0.0388465	1	tr|B4FW73|B4FW73_MAIZE	***	CMP-sialic acid transporter 3	IPR007271 (Nucleotide-sugar transporter)	GO:0000139, GO:0005794, GO:0015136, GO:0015165, GO:0015739, GO:0016020, GO:0016021, GO:0030173, GO:0090481	0.854433	0.841778	Turquoise
TRINITY_DN74670_c0_g1	2.76593	1	-4.16953	0.848929	NA	NA	Unknown protein	NA	NA	0.881621	0.889604	Turquoise
TRINITY_DN74504_c0_g1	4.12179	NA	-2.47269	NA	NA	NA	Unknown protein	NA	NA	0.979809	0.979326	Turquoise
TRINITY_DN7445_c0_g1	3.05104	0.0605648	0.530227	1	NA	NA	Unknown protein	NA	NA	0.950427	0.965825	Turquoise
TRINITY_DN744_c0_g1	1.07712	1	-0.145091	1	tr|A0A1B6QJP8|A0A1B6QJP8_SORBI	*-*	Ubiquitinyl hydrolase 1	IPR028889 (Ubiquitin specific protease domain)	GO:0004843, GO:0006508, GO:0006511, GO:0008233, GO:0008234, GO:0008270, GO:0016578, GO:0016579, GO:0016787, GO:0036459, GO:0046872	0.855971	0.842797	Turquoise
TRINITY_DN7427_c0_g1	-1.9551	0.0297081	-0.457886	1	NA	NA	NA	NA	NA	-0.822191	-0.82493	Turquoise
TRINITY_DN7404_c0_g1	1.7097	0.887171	-0.077255	1	NA	NA	NA	NA	NA	0.812779	0.817285	Turquoise
TRINITY_DN73970_c0_g1	5.36384	0.00387262	-0.755306	1	NA	NA	NA	NA	NA	0.929353	0.936786	Turquoise
TRINITY_DN73794_c2_g1	5.83818	0.00557074	0	1	NA	NA	NA	NA	NA	0.839633	0.857996	Turquoise
TRINITY_DN7378_c0_g3	1.73803	0.764578	-0.327904	1	tr|M4PPG8|M4PPG8_WHEAT	*-*	Glycerol kinase	IPR018485 (Carbohydrate kinase, FGGY, C-terminal)	GO:0004370, GO:0005975, GO:0006072, GO:0016301, GO:0016310, GO:0016773	0.858337	0.848677	Turquoise
TRINITY_DN7368_c2_g1	3.14523	1	-2.84846	1	tr|A0A453SQJ4|A0A453SQJ4_AEGTS	***	Reverse transcriptase domain-containing protein	IPR000477 (Reverse transcriptase domain)	NA	0.872047	0.885331	Turquoise
TRINITY_DN7364_c0_g2	3.52315	0.0127091	0.944483	1	NA	NA	NA	NA	NA	0.894652	0.881555	Turquoise
TRINITY_DN7353_c0_g3	3.8704	NA	-4.08063	NA	NA	NA	Unknown protein	NA	NA	0.961218	0.949827	Turquoise
TRINITY_DN7347_c0_g2	3.99592	0.00702598	1.57672	1	tr|A0A453B5Y2|A0A453B5Y2_AEGTS	***	Reverse transcriptase domain-containing protein	IPR026960 (Reverse transcriptase zinc-binding domain)	NA	0.896238	0.888778	Turquoise
TRINITY_DN7347_c0_g1	0.756139	1	0.0682098	1	tr|A0A061G710|A0A061G710_THECC	***	1-acyl-sn-glycerol-3-phosphate acyltransferase delta isoform 1	IPR021995 (Protein of unknown function DUF3593)	GO:0016020, GO:0016021, GO:0016740, GO:0016746	0.80248	0.809586	Turquoise
TRINITY_DN7346_c0_g1	1.92402	1	-0.913463	1	NA	NA	NA	NA	NA	0.816606	0.825521	Turquoise
TRINITY_DN734_c0_g2	0.479204	1	-0.370321	1	NA	NA	Unknown protein	NA	NA	0.826022	0.814969	Turquoise
TRINITY_DN733_c0_g1	-0.37043	1	0.04629	1	tr|A0A1D6NNQ8|A0A1D6NNQ8_MAIZE	*-*	Pre-mRNA-processing protein 40A	IPR001202 (WW domain), IPR002713 (FF domain)	GO:0000398, GO:0003723, GO:0005685, GO:0045292, GO:0071004	-0.830188	-0.818379	Turquoise
TRINITY_DN73212_c0_g3	4.43826	0.0167488	-1.23881	1	NA	NA	NA	NA	NA	0.95607	0.961205	Turquoise
TRINITY_DN73117_c0_g2	3.92463	0.00476901	2.78962	0.491927	NA	NA	NA	NA	NA	0.862312	0.867386	Turquoise
TRINITY_DN731_c0_g1	1.17196	1	0.304835	1	tr|A0A453GPA7|A0A453GPA7_AEGTS	***	NB-ARC domain-containing protein	IPR001611 (Leucine-rich repeat), IPR002182 (NB-ARC), IPR003591 (Leucine-rich repeat, typical subtype), IPR027417 (P-loop containing nucleoside triphosphate hydrolase), IPR032675 (Leucine-rich repeat domain, L domain-like)	NA	0.854262	0.873384	Turquoise
TRINITY_DN7304_c1_g1	1.17706	1	-2.19285	0.827561	tr|D8SYH5|D8SYH5_SELML	*-*	U2 snRNP auxiliary factor large subunit	IPR012677 (Nucleotide-binding alpha-beta plait domain)	GO:0003676, GO:0003723, GO:0005634, GO:0006397, GO:0008380	0.834516	0.802599	Turquoise
TRINITY_DN7270_c0_g3	4.5281	0.531541	-5.19316	0.867087	tr|A0A3B6PFM9|A0A3B6PFM9_WHEAT	***	Protein kinase domain-containing protein	IPR009057 (Homeobox domain-like), IPR011009 (Protein kinase-like domain)	NA	0.959627	0.95564	Turquoise
TRINITY_DN72691_c0_g1	4.42378	0.0748079	-0.895586	1	NA	NA	NA	NA	NA	0.829482	0.833777	Turquoise
TRINITY_DN7267_c2_g1	1.315	0.898453	0.127593	1	tr|I1IYL4|I1IYL4_BRADI	***	Peroxidase	IPR010255 (Haem peroxidase)	GO:0004601, GO:0005576, GO:0006979, GO:0016491, GO:0020037, GO:0042744, GO:0046872, GO:0055114, GO:0098869	0.925942	0.920286	Turquoise
TRINITY_DN7267_c0_g3	0.76311	1	-0.0432889	1	tr|M0XGQ7|M0XGQ7_HORVV	***	Peroxidase	IPR010255 (Haem peroxidase)	GO:0004601, GO:0005576, GO:0006979, GO:0016491, GO:0020037, GO:0042744, GO:0046872, GO:0055114, GO:0098869	0.85842	0.871485	Turquoise
TRINITY_DN7263_c0_g1	4.33526	2.56e-05	0.122851	1	tr|A0A0E0QCD8|A0A0E0QCD8_ORYRU	***	Sod_Cu domain-containing protein	IPR009003 (Peptidase S1, PA clan)	GO:0004784, GO:0006801, GO:0019430, GO:0046872, GO:0055114	0.98671	0.980868	Turquoise
TRINITY_DN72591_c0_g2	3.40053	0.0373653	2.06706	1	NA	NA	NA	NA	NA	0.847083	0.867079	Turquoise
TRINITY_DN7252_c0_g1	0.792493	1	-0.603774	1	NA	NA	NA	NA	NA	0.824932	0.821068	Turquoise
TRINITY_DN72481_c0_g2	4.90985	2.44e-05	-1.53818	1	tr|A0A3B6TIT6|A0A3B6TIT6_WHEAT	***	Ubiquitinyl hydrolase 1	IPR001607 (Zinc finger, UBP-type), IPR013083 (Zinc finger, RING/FYVE/PHD-type), IPR028889 (Ubiquitin specific protease domain)	NA	0.960569	0.952756	Turquoise
TRINITY_DN72418_c0_g1	3.10385	0.00867113	0.912343	1	tr|A0A287Y104|A0A287Y104_HORVV	*-*	NB-ARC domain-containing protein	IPR002182 (NB-ARC), IPR032675 (Leucine-rich repeat domain, L domain-like)	GO:0043531	0.911816	0.909202	Turquoise
TRINITY_DN7233_c0_g1	1.45495	1	-0.0276526	1	NA	NA	NA	NA	NA	0.858166	0.864242	Turquoise
TRINITY_DN723_c0_g1	0.782744	1	0.0797041	1	tr|A0A446Y6D6|A0A446Y6D6_TRITD	***	PMR5N domain-containing protein	IPR025846 (PMR5 N-terminal domain), IPR026057 (PC-Esterase)	NA	0.868387	0.857189	Turquoise
TRINITY_DN721_c0_g1	0.860117	1	-0.12846	1	tr|A0A2K2DUK8|A0A2K2DUK8_BRADI	*-*	Urb2 domain-containing protein	IPR018849 (Nucleolar 27S pre-rRNA processing, Urb2/Npa2, C-terminal)	NA	0.834445	0.857119	Turquoise
TRINITY_DN7207_c0_g1	1.05615	1	0.539428	1	tr|A0A3L6RHT1|A0A3L6RHT1_PANMI	*-*	Sister chromatid cohesion 1 protein 4	NA	NA	0.847995	0.862869	Turquoise
TRINITY_DN72056_c0_g1	2.65137	0.681624	-0.514042	1	NA	NA	NA	NA	NA	0.802982	0.802015	Turquoise
TRINITY_DN71952_c0_g1	3.46311	0.0367525	0.98444	1	NA	NA	NA	NA	NA	0.916075	0.908474	Turquoise
TRINITY_DN719_c0_g1	0.603074	1	-0.389093	1	tr|A0A1D6PDW1|A0A1D6PDW1_MAIZE	***	Myosin heavy chain-related	NA	NA	0.904767	0.894101	Turquoise
TRINITY_DN7187_c0_g1	0.433423	1	-0.123199	1	tr|A0A1E5VXT2|A0A1E5VXT2_9POAL	***	Serine protease SPPA, chloroplastic	IPR002142 (Peptidase S49), IPR029045 (ClpP/crotonase-like domain)	GO:0006465, GO:0006508, GO:0008233, GO:0016021	0.903936	0.905107	Turquoise
TRINITY_DN7185_c0_g2	2.25652	1.07e-05	0.681461	1	tr|B9EWI9|B9EWI9_ORYSJ	***	RRM domain-containing protein	NA	GO:0003676, GO:0003723	0.959246	0.956409	Turquoise
TRINITY_DN71838_c0_g1	1.84979	0.981292	0.0562136	1	NA	NA	NA	NA	NA	0.822162	0.840779	Turquoise
TRINITY_DN71810_c0_g1	1.12035	1	-0.79521	1	tr|A0A3L6TBG7|A0A3L6TBG7_PANMI	***	Protein GAMETE EXPRESSED 1-like	NA	NA	0.822032	0.811777	Turquoise
TRINITY_DN7153_c0_g1	-1.21375	0.940704	0.262967	1	tr|A0A2H3Z899|A0A2H3Z899_PHODC	***	transcription factor SCREAM2-like	IPR011598 (Myc-type, basic helix-loop-helix (bHLH) domain)	GO:0046983	-0.877868	-0.870236	Turquoise
TRINITY_DN71504_c0_g1	6.82338	0.000467467	0	1	NA	NA	NA	NA	NA	0.785405	0.809247	Turquoise
TRINITY_DN71373_c0_g1	1.98582	0.29104	-0.38004	1	NA	NA	NA	NA	NA	0.901444	0.918663	Turquoise
TRINITY_DN7123_c0_g1	0.96636	1	0.0840083	1	NA	NA	NA	NA	NA	0.822156	0.841085	Turquoise
TRINITY_DN712_c0_g1	0.530966	1	-0.191442	1	sp|Q0JM17|RH56_ORYSJ	*-*	DEAD-box ATP-dependent RNA helicase 56	NA	GO:0000166, GO:0003676, GO:0003723, GO:0004386, GO:0005515, GO:0005524, GO:0005634, GO:0006397, GO:0008380, GO:0009555, GO:0016787, GO:0048653, GO:0051028	0.900916	0.88833	Turquoise
TRINITY_DN7119_c5_g1	4.46466	0.0249109	-0.67586	1	NA	NA	NA	NA	NA	0.929344	0.92234	Turquoise
TRINITY_DN71125_c0_g1	11.9378	1.51e-27	0	1	NA	NA	NA	NA	NA	0.976242	0.977054	Turquoise
TRINITY_DN7108_c0_g1	7.38787	0.000113157	3.83399	0.609018	tr|A0A287U4B9|A0A287U4B9_HORVV	***	Hexosyltransferase	NA	GO:0000139, GO:0005794, GO:0006486, GO:0008378, GO:0016020, GO:0016021, GO:0016740, GO:0016757	0.963859	0.957542	Turquoise
TRINITY_DN7101_c0_g1	1.70658	0.326553	-0.126432	1	tr|A0A287UJB2|A0A287UJB2_HORVV	***	Pectin acetylesterase	IPR004963 (Pectinacetylesterase/NOTUM), IPR029058 (Alpha/Beta hydrolase fold)	GO:0005576, GO:0005618, GO:0016787, GO:0071555	0.89715	0.898701	Turquoise
TRINITY_DN70935_c0_g2	5.57963	0.000176544	4.29422	0.0498591	NA	NA	Unknown protein	NA	NA	0.867129	0.873812	Turquoise
TRINITY_DN70911_c0_g1	1.58553	0.259075	0.655749	1	tr|A0A3L6SYV8|A0A3L6SYV8_PANMI	*-*	Protein CHUP1, chloroplastic	NA	NA	0.854081	0.872221	Turquoise
TRINITY_DN70891_c0_g1	-3.05622	0.0663685	0.191373	1	tr|A0A2X0SWJ9|A0A2X0SWJ9_WHEAT	*-*	Amino_oxidase domain-containing protein	IPR002937 (Amine oxidase), IPR023753 (FAD/NAD(P)-binding domain)	GO:0005777, GO:0016491, GO:0046208, GO:0050660, GO:0052894, GO:0052901, GO:0055114, GO:1903602	-0.831713	-0.816408	Turquoise
TRINITY_DN7085_c0_g1	-3.10455	1.52e-06	-0.071746	1	tr|B8BLU7|B8BLU7_ORYSI	*-*	F-box domain-containing protein	IPR001810 (F-box domain), IPR017451 (F-box associated interaction domain)	GO:0008270	-0.85547	-0.8569	Turquoise
TRINITY_DN7084_c0_g1	11.604	1.06e-25	1.40025	1	NA	NA	Unknown protein	NA	NA	0.956067	0.965545	Turquoise
TRINITY_DN7075_c0_g1	-1.6376	0.551949	0.65657	1	NA	NA	NA	NA	NA	-0.803622	-0.803878	Turquoise
TRINITY_DN70716_c0_g1	2.63221	0.151369	-0.386467	1	tr|A0A453INH9|A0A453INH9_AEGTS	*-*	TTF-type domain-containing protein	NA	NA	0.91558	0.914219	Turquoise
TRINITY_DN70665_c0_g1	2.94295	0.647809	-0.616848	1	NA	NA	NA	NA	NA	0.890648	0.883932	Turquoise
TRINITY_DN7066_c0_g1	2.27557	0.273542	0.473221	1	NA	NA	Unknown protein	NA	NA	0.936855	0.935157	Turquoise
TRINITY_DN70530_c2_g1	4.4568	0.0092113	2.88594	0.841276	NA	NA	NA	NA	NA	0.849155	0.837439	Turquoise
TRINITY_DN7048_c0_g2	-0.806228	1	0.188652	1	tr|A0A1R3KWD9|A0A1R3KWD9_COCAP	***	Glycosyl transferase	NA	GO:0016740	-0.906664	-0.900035	Turquoise
TRINITY_DN7003_c0_g1	0.840942	1	-0.168179	1	tr|M8C920|M8C920_AEGTA	*-*	DUF295 domain-containing protein	NA	NA	0.868169	0.847845	Turquoise
TRINITY_DN700_c2_g1	1.58537	0.264211	-0.614549	1	NA	NA	NA	NA	NA	0.949741	0.953216	Turquoise
TRINITY_DN6999_c0_g3	3.81553	0.112484	1.87076	1	NA	NA	NA	NA	NA	0.857894	0.853056	Turquoise
TRINITY_DN69978_c0_g3	7.2339	6.74e-06	4.75773	0.0815492	NA	NA	NA	NA	NA	0.909491	0.922023	Turquoise
TRINITY_DN6995_c10_g2	2.48103	0.852799	-1.69887	1	tr|A0A452YRD3|A0A452YRD3_AEGTS	***	Reverse transcriptase domain-containing protein	IPR000477 (Reverse transcriptase domain), IPR005135 (Endonuclease/exonuclease/phosphatase)	NA	0.878112	0.865089	Turquoise
TRINITY_DN6995_c1_g1	2.27561	0.237543	0.0434934	1	NA	NA	Unknown protein	NA	NA	0.842683	0.835937	Turquoise
TRINITY_DN6993_c0_g1	2.36852	0.298471	-5.40585	0.000353896	tr|A2WVB5|A2WVB5_ORYSI	*-*	SIAH-type domain-containing protein	IPR001229 (Jacalin-like lectin domain), IPR004162 (E3 ubiquitin-protein ligase SIN-like)	GO:0003824, GO:0005634, GO:0006511, GO:0007275, GO:0008270, GO:0016567, GO:0046872	0.840493	0.855416	Turquoise
TRINITY_DN698_c0_g2	1.79538	1	-1.29448	1	NA	NA	NA	NA	NA	0.827024	0.831599	Turquoise
TRINITY_DN6968_c0_g1	0.707847	1	-0.0965193	1	tr|B9RQ25|B9RQ25_RICCO	***	Aldehyde oxidase, putative	IPR012675 (Beta-grasp domain), IPR016166 (FAD-binding, type 2), IPR016208 (Aldehyde oxidase/xanthine dehydrogenase)	GO:0004031, GO:0005506, GO:0009055, GO:0016491, GO:0022900, GO:0046872, GO:0050660, GO:0051536, GO:0051537, GO:0055114, GO:0071949, GO:0102797, GO:0102798	0.934732	0.941496	Turquoise
TRINITY_DN6966_c0_g2	1.81224	0.20494	-0.321641	1	NA	NA	NA	NA	NA	0.885686	0.90006	Turquoise
TRINITY_DN69265_c0_g1	1.64257	1	-0.514019	1	NA	NA	Unknown protein	NA	NA	0.855296	0.854867	Turquoise
TRINITY_DN69200_c2_g1	9.22051	2.81e-13	0	1	tr|A0A2N9G656|A0A2N9G656_FAGSY	***	Reverse transcriptase domain-containing protein	IPR000477 (Reverse transcriptase domain), IPR005135 (Endonuclease/exonuclease/phosphatase)	NA	0.934078	0.948187	Turquoise
TRINITY_DN692_c1_g1	1.13975	1	-0.0755392	1	tr|A0A2P2KMP0|A0A2P2KMP0_RHIMU	***	Cytochrome P450 family protein	IPR001128 (Cytochrome P450)	GO:0004497, GO:0005506, GO:0016020, GO:0016021, GO:0016491, GO:0016705, GO:0020037, GO:0046872, GO:0055114	0.893713	0.880767	Turquoise
TRINITY_DN69191_c0_g2	1.67409	0.881081	0.495615	1	NA	NA	NA	NA	NA	0.795363	0.807501	Turquoise
TRINITY_DN69169_c0_g1	2.84504	0.120764	0.0489707	1	tr|A0A287P123|A0A287P123_HORVV	*-*	Arf-GAP domain-containing protein	NA	GO:0005096, GO:0043547, GO:0046872	0.795663	0.817138	Turquoise
TRINITY_DN69168_c1_g1	8.64868	1.93e-11	0.573299	1	NA	NA	NA	NA	NA	0.927997	0.944103	Turquoise
TRINITY_DN69147_c0_g1	4.32653	0.00316267	0.506045	1	NA	NA	NA	NA	NA	0.930638	0.921363	Turquoise
TRINITY_DN69096_c0_g2	5.9597	0.00287859	0	1	NA	NA	Unknown protein	NA	NA	0.827418	0.852923	Turquoise
TRINITY_DN69096_c0_g1	7.04492	1.89e-05	0	1	NA	NA	NA	NA	NA	0.810352	0.836356	Turquoise
TRINITY_DN690_c1_g1	2.27141	0.363638	0.0157456	1	NA	NA	NA	NA	NA	0.843101	0.851567	Turquoise
TRINITY_DN6898_c1_g1	6.73772	0.000140086	0	1	tr|Q10L29|Q10L29_ORYSJ	*-*	Retrotransposon protein, putative, Ty1-copia subclass	IPR001878 (Zinc finger, CCHC-type)	GO:0000943	0.816134	0.81236	Turquoise
TRINITY_DN68971_c1_g3	4.74991	0.0300402	0.946369	1	NA	NA	NA	NA	NA	0.869917	0.856879	Turquoise
TRINITY_DN68937_c0_g2	6.70184	4.88e-05	2.82262	1	NA	NA	NA	NA	NA	0.899419	0.918676	Turquoise
TRINITY_DN68928_c0_g1	3.23346	0.408981	-4.71766	0.326248	NA	NA	Unknown protein	NA	NA	0.849957	0.848538	Turquoise
TRINITY_DN68914_c0_g1	5.25144	7.08e-05	2.88593	0.61785	NA	NA	NA	NA	NA	0.910145	0.902631	Turquoise
TRINITY_DN68752_c0_g1	2.82956	0.553596	-3.47638	0.978675	NA	NA	NA	NA	NA	0.824769	0.824483	Turquoise
TRINITY_DN6873_c0_g1	-0.721649	1	-0.0511815	1	tr|Q84LR0|Q84LR0_SOLLC	*-*	Metal transporter	IPR001046 (NRAMP family)	GO:0005384, GO:0005773, GO:0005774, GO:0015086, GO:0016020, GO:0016021, GO:0030001, GO:0042742, GO:0046873, GO:0055072, GO:0070574, GO:0071421, GO:2000379	-0.861396	-0.865136	Turquoise
TRINITY_DN6868_c0_g2	-1.66532	0.572519	0.0208071	1	tr|A0A2R6PGM7|A0A2R6PGM7_ACTCC	*-*	Regulator of rDNA transcription protein	NA	NA	-0.842001	-0.826856	Turquoise
TRINITY_DN6858_c0_g2	1.89592	1	-0.917264	1	NA	NA	NA	NA	NA	0.817077	0.829441	Turquoise
TRINITY_DN68525_c0_g3	4.3977	8.63e-05	0.481614	1	NA	NA	Unknown protein	NA	NA	0.879872	0.901658	Turquoise
TRINITY_DN68525_c0_g1	10.2084	1.25e-18	0	1	tr|A0A0E0CIQ7|A0A0E0CIQ7_9ORYZ	***	BTB domain-containing protein	IPR011333 (SKP1/BTB/POZ domain), IPR011705 (BTB/Kelch-associated)	NA	0.964975	0.97551	Turquoise
TRINITY_DN68455_c2_g1	2.36371	0.237104	0.255707	1	NA	NA	NA	NA	NA	0.890545	0.905802	Turquoise
TRINITY_DN6839_c0_g1	-0.791838	1	-0.210784	1	sp|P41378|IF4A_WHEAT	*-*	Eukaryotic initiation factor 4A	IPR014001 (Helicase superfamily 1/2, ATP-binding domain), IPR014014 (RNA helicase, DEAD-box type, Q motif), IPR027417 (P-loop containing nucleoside triphosphate hydrolase)	GO:0000166, GO:0003676, GO:0003723, GO:0003743, GO:0004386, GO:0005524, GO:0006412, GO:0006413, GO:0016787	-0.790083	-0.819855	Turquoise
TRINITY_DN68325_c0_g1	7.17861	5.8e-05	-1.14503	1	NA	NA	NA	NA	NA	0.806913	0.822126	Turquoise
TRINITY_DN6831_c2_g1	1.98105	0.00404227	0.177229	1	tr|A0A453P890|A0A453P890_AEGTS	***	tRNA_edit domain-containing protein	IPR007214 (YbaK/aminoacyl-tRNA synthetase-associated domain)	NA	0.963472	0.964479	Turquoise
TRINITY_DN6830_c2_g3	2.44717	0.0450019	0.336396	1	NA	NA	NA	NA	NA	0.944815	0.943528	Turquoise
TRINITY_DN68273_c0_g1	-6.96936	3.52e-07	-0.244015	1	NA	NA	NA	NA	NA	-0.888174	-0.898474	Turquoise
TRINITY_DN6813_c0_g1	1.73819	1	0.51118	1	NA	NA	Unknown protein	NA	NA	0.814328	0.833912	Turquoise
TRINITY_DN6812_c0_g1	1.80018	0.1728	0.46689	1	NA	NA	Unknown protein	NA	NA	0.884257	0.893302	Turquoise
TRINITY_DN6810_c0_g1	0.688864	1	-0.024264	1	tr|M8AXS7|M8AXS7_AEGTA	***	Agmatine deiminase	IPR007466 (Peptidyl-arginine deiminase, Porphyromonas-type)	GO:0004668, GO:0009446, GO:0047632	0.917586	0.926302	Turquoise
TRINITY_DN6804_c2_g2	5.21955	0.00161165	-1.15328	1	tr|A0A0E0EKD6|A0A0E0EKD6_9ORYZ	*-*	Reverse transcriptase domain-containing protein	IPR000477 (Reverse transcriptase domain)	GO:0003676, GO:0008270	0.847371	0.819671	Turquoise
TRINITY_DN67912_c0_g1	6.27183	0.000915523	0.862891	1	tr|A0A3L6PZB2|A0A3L6PZB2_PANMI	***	Transpos_assoc domain-containing protein	IPR004242 (Transposon, En/Spm-like), IPR029480 (Transposase-associated domain)	NA	0.839574	0.823245	Turquoise
TRINITY_DN67848_c0_g1	6.93679	3.26e-05	0	1	NA	NA	NA	NA	NA	0.883775	0.876481	Turquoise
TRINITY_DN67730_c0_g1	1.53757	1	-0.437838	1	NA	NA	NA	NA	NA	0.870607	0.860471	Turquoise
TRINITY_DN67620_c0_g2	7.80513	0.0040065	5.53928	0.300751	NA	NA	NA	NA	NA	0.902917	0.909388	Turquoise
TRINITY_DN67564_c0_g1	2.4743	1	-0.295952	1	tr|M7YMU7|M7YMU7_TRIUA	*-*	Subtilisin-like protease	IPR015500 (Peptidase S8, subtilisin-related)	GO:0004252, GO:0006508, GO:0008233, GO:0016787	0.832668	0.820142	Turquoise
TRINITY_DN6740_c0_g3	2.81009	0.194169	-5.1281	0.0380829	NA	NA	NA	NA	NA	0.919022	0.929423	Turquoise
TRINITY_DN67303_c0_g1	3.01181	0.159322	1.49471	1	tr|A0A2X0TW31|A0A2X0TW31_WHEAT	*-*	Reverse transcriptase domain-containing protein	IPR026960 (Reverse transcriptase zinc-binding domain)	GO:0003676, GO:0004523, GO:0090502	0.866715	0.879526	Turquoise
TRINITY_DN6729_c0_g1	0.202941	1	-0.236502	1	tr|A0A4D6LMM1|A0A4D6LMM1_VIGUN	***	Ubiquitin-conjugating enzyme E2 variant	IPR016135 (Ubiquitin-conjugating enzyme/RWD-like)	NA	0.831239	0.816154	Turquoise
TRINITY_DN6723_c2_g2	2.61117	0.354224	-0.491174	1	tr|A0A3B6RMK0|A0A3B6RMK0_WHEAT	*-*	Protein kinase domain-containing protein	IPR011009 (Protein kinase-like domain)	NA	0.825406	0.827302	Turquoise
TRINITY_DN6723_c2_g1	3.09331	0.25936	-0.665043	1	NA	NA	NA	NA	NA	0.858533	0.851485	Turquoise
TRINITY_DN67157_c0_g1	3.47236	0.292287	-0.0922358	1	tr|A0A1D6KYU4|A0A1D6KYU4_MAIZE	*-*	CSC1-like protein RXW8	IPR003864 (Calcium-dependent channel, 7TM region, putative phosphate)	GO:0016020, GO:0016021	0.857203	0.857214	Turquoise
TRINITY_DN67129_c0_g1	1.66371	1	-1.17803	1	NA	NA	NA	NA	NA	0.843448	0.841437	Turquoise
TRINITY_DN6709_c2_g2	6.35035	0.000758361	0	1	NA	NA	NA	NA	NA	0.832208	0.832444	Turquoise
TRINITY_DN67026_c1_g1	3.29738	0.0080906	2.04759	1	NA	NA	Unknown protein	IPR003903 (Ubiquitin interacting motif)	NA	0.77156	0.804529	Turquoise
TRINITY_DN669_c0_g2	2.52927	0.226357	-1.20057	1	NA	NA	Unknown protein	NA	NA	0.961361	0.958173	Turquoise
TRINITY_DN6685_c1_g1	1.60084	0.498	-0.243236	1	NA	NA	Unknown protein	IPR000515 (ABC transporter type 1, transmembrane domain MetI-like)	NA	0.89547	0.897908	Turquoise
TRINITY_DN6684_c0_g1	-1.0166	1	0.263757	1	tr|A0A0Q3E812|A0A0Q3E812_BRADI	***	Histone deacetylase	IPR000286 (Histone deacetylase superfamily), IPR023801 (Histone deacetylase domain)	GO:0004407, GO:0005634, GO:0006325, GO:0016575, GO:0016787, GO:0032041, GO:0046872, GO:0070932	-0.88547	-0.87321	Turquoise
TRINITY_DN6665_c0_g2	1.17768	1	0.112502	1	NA	NA	NA	NA	NA	0.824192	0.824352	Turquoise
TRINITY_DN66559_c0_g1	2.83142	1	-5.41713	0.804183	NA	NA	NA	NA	NA	0.895501	0.8912	Turquoise
TRINITY_DN66415_c0_g1	2.91901	0.19876	0.0580422	1	NA	NA	NA	NA	NA	0.87513	0.890804	Turquoise
TRINITY_DN6633_c3_g1	2.74823	0.0218876	1.42152	1	NA	NA	NA	NA	NA	0.844448	0.856518	Turquoise
TRINITY_DN6622_c0_g2	1.77174	1	-0.102687	1	AT5G63950.1	*-*	chromatin remodeling 24	IPR001650 (Helicase, C-terminal), IPR027417 (P-loop containing nucleoside triphosphate hydrolase)	NA	0.799998	0.821815	Turquoise
TRINITY_DN6622_c0_g1	1.53954	1	-1.02649	1	AT5G63950.1	*-*	chromatin remodeling 24	IPR000330 (SNF2-related, N-terminal domain), IPR001650 (Helicase, C-terminal), IPR004087 (K Homology domain), IPR027417 (P-loop containing nucleoside triphosphate hydrolase)	NA	0.864664	0.863622	Turquoise
TRINITY_DN6615_c0_g1	0.493456	1	0.107152	1	tr|A0A446M0X9|A0A446M0X9_TRITD	***	GOLD domain-containing protein	IPR015720 (TMP21-related)	NA	0.871822	0.86801	Turquoise
TRINITY_DN66108_c0_g1	2.73015	0.634621	0.354004	1	NA	NA	NA	NA	NA	0.930715	0.927481	Turquoise
TRINITY_DN66054_c0_g1	1.42594	1	-3.4299	0.482021	tr|A0A453GPH9|A0A453GPH9_AEGTS	*-*	Protein kinase domain-containing protein	IPR011009 (Protein kinase-like domain)	NA	0.824159	0.825386	Turquoise
TRINITY_DN66045_c0_g1	3.17887	0.00129551	0.119883	1	NA	NA	NA	NA	NA	0.969831	0.979132	Turquoise
TRINITY_DN66015_c0_g1	2.25408	0.472634	0.14678	1	NA	NA	NA	NA	NA	0.865821	0.883422	Turquoise
TRINITY_DN65794_c2_g1	1.83283	1	-4.65055	0.0864036	NA	NA	NA	NA	NA	0.88081	0.884368	Turquoise
TRINITY_DN65769_c0_g1	2.42494	0.0415406	0.784204	1	tr|A0A3B6JMQ8|A0A3B6JMQ8_WHEAT	***	Germin-like protein	IPR001929 (Germin)	NA	0.906996	0.891892	Turquoise
TRINITY_DN6570_c0_g1	0.989098	1	-1.01545	1	NA	NA	Unknown protein	NA	NA	0.909028	0.895057	Turquoise
TRINITY_DN657_c0_g1	2.29267	1	-0.51829	1	NA	NA	Unknown protein	NA	NA	0.901707	0.898965	Turquoise
TRINITY_DN65696_c0_g1	2.47528	0.167511	-0.485497	1	NA	NA	NA	NA	NA	0.945598	0.94577	Turquoise
TRINITY_DN65692_c0_g1	6.56619	1.35e-05	2.89589	1	tr|A0A3L6RI58|A0A3L6RI58_PANMI	***	Protein HESO1-like	NA	NA	0.985879	0.985982	Turquoise
TRINITY_DN65657_c0_g1	2.04611	1	-4.76249	0.400822	NA	NA	NA	NA	NA	0.847493	0.853161	Turquoise
TRINITY_DN65655_c0_g2	5.5205	0.000617603	3.66951	0.317754	NA	NA	NA	NA	NA	0.919251	0.909876	Turquoise
TRINITY_DN6555_c1_g1	1.46534	0.581729	0.715357	1	tr|A0A2K2CJN0|A0A2K2CJN0_BRADI	***	RRM domain-containing protein	IPR012677 (Nucleotide-binding alpha-beta plait domain)	GO:0003676, GO:0003723	0.812971	0.816499	Turquoise
TRINITY_DN6553_c0_g1	-0.357161	1	-0.155579	1	tr|A0A453NS09|A0A453NS09_AEGTS	***	Vacuolar proton pump subunit B	IPR000194 (ATPase, F1/V1/A1 complex, alpha/beta subunit, nucleotide-binding domain), IPR022879 (V-type ATP synthase regulatory subunit B/beta), IPR027417 (P-loop containing nucleoside triphosphate hydrolase)	NA	-0.785525	-0.80641	Turquoise
TRINITY_DN65450_c0_g1	6.51722	0.000160871	0.563188	1	tr|A0A287JZW0|A0A287JZW0_HORVV	*-*	SIAH-type domain-containing protein	NA	GO:0005634, GO:0006511, GO:0007275, GO:0008270, GO:0046872	0.867776	0.858879	Turquoise
TRINITY_DN6541_c0_g1	0.501692	1	0.133174	1	tr|A0A287M926|A0A287M926_HORVV	***	HUN domain-containing protein	IPR014840 (Hpc2-related domain)	NA	0.815561	0.81541	Turquoise
TRINITY_DN65327_c0_g1	1.49319	1	0.111722	1	NA	NA	NA	NA	NA	0.808483	0.819869	Turquoise
TRINITY_DN65244_c0_g1	6.04142	0.00036155	1.71184	1	tr|A0A438EA49|A0A438EA49_VITVI	*-*	Retrovirus-related Pol polyprotein from transposon TNT 1-94	IPR012337 (Ribonuclease H-like domain)	NA	0.952309	0.948296	Turquoise
TRINITY_DN65181_c0_g1	3.30821	7.36e-05	2.20986	0.311422	NA	NA	NA	NA	NA	0.833789	0.840495	Turquoise
TRINITY_DN65180_c1_g1	3.27505	0.176894	-1.50585	1	NA	NA	NA	NA	NA	0.798822	0.80699	Turquoise
TRINITY_DN65148_c0_g3	3.38518	0.0377567	1.11424	1	NA	NA	Unknown protein	NA	NA	0.885979	0.873095	Turquoise
TRINITY_DN65142_c0_g2	6.20866	0.000381455	1.58597	1	tr|K4JFK6|K4JFK6_MAIZE	*-*	GeBP-type transcription factor	IPR007592 (GLABROUS1 enhancer-binding protein family)	GO:0006355	0.945399	0.93859	Turquoise
TRINITY_DN65107_c0_g1	-8.45329	1.75e-11	-0.309271	1	NA	NA	NA	NA	NA	-0.875229	-0.862377	Turquoise
TRINITY_DN6474_c1_g1	0.58634	1	-0.413898	1	tr|A0A5A7QKY2|A0A5A7QKY2_STRAF	***	Rho GTPase activation protein (RhoGAP) with PHdomain	NA	NA	0.866766	0.853211	Turquoise
TRINITY_DN64734_c0_g1	3.37467	0.152168	0.246373	1	tr|T1MUC9|T1MUC9_TRIUA	*-*	rRNA N-glycosidase	NA	GO:0006952, GO:0009405, GO:0016787, GO:0017148, GO:0030598, GO:0090729	0.877722	0.871643	Turquoise
TRINITY_DN6462_c0_g1	0.583888	1	0.174249	1	tr|R7W4Q4|R7W4Q4_AEGTA	***	Myosin-2 heavy chain	IPR027417 (P-loop containing nucleoside triphosphate hydrolase)	GO:0000166, GO:0003774, GO:0003779, GO:0005524, GO:0016459, GO:0051015	0.79944	0.820922	Turquoise
TRINITY_DN64614_c0_g1	2.58574	1	-0.123214	1	NA	NA	NA	NA	NA	0.83074	0.835636	Turquoise
TRINITY_DN6458_c0_g1	1.47025	0.826291	0.287354	1	NA	NA	Unknown protein	NA	NA	0.866333	0.872404	Turquoise
TRINITY_DN6454_c1_g1	2.52956	0.0903331	1.39735	1	NA	NA	NA	NA	NA	0.832695	0.826709	Turquoise
TRINITY_DN64437_c0_g1	2.3747	8.58e-05	0.933615	1	tr|F2E161|F2E161_HORVV	*-*	DNA polymerase	IPR012337 (Ribonuclease H-like domain)	GO:0000166, GO:0003676, GO:0003677, GO:0003887, GO:0005634, GO:0006260, GO:0006281, GO:0016035, GO:0016740, GO:0016779, GO:0019985, GO:0046872, GO:0051536, GO:0051539	0.953696	0.961161	Turquoise
TRINITY_DN6439_c0_g2	-4.46352	2.19e-12	-0.135902	1	NA	NA	NA	NA	NA	-0.917918	-0.908077	Turquoise
TRINITY_DN64378_c0_g1	1.96475	1	-2.43457	1	tr|A0A446QN31|A0A446QN31_TRITD	*-*	PPR_long domain-containing protein	NA	NA	0.821246	0.830201	Turquoise
TRINITY_DN64347_c0_g1	5.05837	0.015679	1.17772	1	NA	NA	NA	NA	NA	0.955676	0.961018	Turquoise
TRINITY_DN6430_c0_g1	2.22077	0.603795	0.392027	1	NA	NA	NA	NA	NA	0.837088	0.849059	Turquoise
TRINITY_DN64109_c0_g3	8.01636	7.17e-09	0	1	NA	NA	NA	NA	NA	0.913622	0.921966	Turquoise
TRINITY_DN6410_c0_g1	-0.792132	1	-0.166211	1	tr|A0A446KUA1|A0A446KUA1_TRITD	***	Cytochrome c domain-containing protein	IPR009056 (Cytochrome c-like domain)	NA	-0.847075	-0.85838	Turquoise
TRINITY_DN641_c0_g1	-2.81269	4.04e-07	-0.217946	1	tr|A0A446PKU3|A0A446PKU3_TRITD	*-*	VHS domain-containing protein	NA	NA	-0.868025	-0.864287	Turquoise
TRINITY_DN6390_c0_g1	2.21197	0.565782	0.501309	1	NA	NA	Unknown protein	NA	NA	0.818173	0.80521	Turquoise
TRINITY_DN63892_c0_g1	2.05583	0.771852	-0.397474	1	NA	NA	NA	NA	NA	0.893852	0.903644	Turquoise
TRINITY_DN63891_c1_g1	1.44024	1	-3.94966	0.0491213	NA	NA	NA	NA	NA	0.867734	0.863997	Turquoise
TRINITY_DN63874_c1_g1	8.03636	2.31e-09	0	1	tr|A0A453SAB5|A0A453SAB5_AEGTS	***	zf-RVT domain-containing protein	IPR026960 (Reverse transcriptase zinc-binding domain)	NA	0.944372	0.959084	Turquoise
TRINITY_DN6383_c0_g2	-4.66964	0.0217012	-0.0248596	1	NA	NA	NA	NA	NA	-0.853485	-0.849826	Turquoise
TRINITY_DN638_c0_g1	9.78923	0.00219274	7.07218	0.195839	NA	NA	NA	NA	NA	0.854805	0.857596	Turquoise
TRINITY_DN6363_c0_g1	7.12465	5.35e-06	0	1	NA	NA	NA	NA	NA	0.883594	0.873166	Turquoise
TRINITY_DN63592_c0_g2	6.22242	0.000247811	0	1	tr|A0A0E0E3W8|A0A0E0E3W8_9ORYZ	***	Auxin efflux carrier component	IPR004776 (Membrane transport protein)	GO:0009734, GO:0016020, GO:0016021, GO:0055085	0.963181	0.957923	Turquoise
TRINITY_DN63401_c2_g1	2.84343	1	-0.0244674	1	NA	NA	NA	NA	NA	0.863739	0.859195	Turquoise
TRINITY_DN63376_c0_g2	5.47507	0.00410667	0.926311	1	NA	NA	Unknown protein	NA	NA	0.859314	0.836111	Turquoise
TRINITY_DN6330_c0_g1	0.955178	1	0.315801	1	tr|A0A0D9W949|A0A0D9W949_9ORYZ	***	DNA ligase	IPR000977 (DNA ligase, ATP-dependent), IPR012340 (Nucleic acid-binding, OB-fold)	GO:0000166, GO:0003677, GO:0003909, GO:0003910, GO:0005524, GO:0006260, GO:0006281, GO:0006310, GO:0006974, GO:0016874, GO:0051103, GO:0071897	0.784447	0.800106	Turquoise
TRINITY_DN63260_c0_g2	7.12917	1.66e-06	5.49593	0.00506702	NA	NA	NA	NA	NA	0.891973	0.893197	Turquoise
TRINITY_DN6323_c1_g1	5.17581	0.00361095	0.418711	1	NA	NA	NA	NA	NA	0.827823	0.841761	Turquoise
TRINITY_DN63228_c0_g1	0.401154	1	-0.227534	1	tr|W5AQ45|W5AQ45_WHEAT	***	F-box domain-containing protein	IPR001810 (F-box domain)	NA	0.844765	0.844835	Turquoise
TRINITY_DN63219_c0_g1	6.05291	0.000790198	0.214351	1	tr|A0A3B6NRW1|A0A3B6NRW1_WHEAT	***	C2 domain-containing protein	IPR000008 (C2 domain)	NA	0.841212	0.861025	Turquoise
TRINITY_DN63025_c0_g1	7.02392	0.000450232	4.57763	0.278394	NA	NA	NA	NA	NA	0.891374	0.89708	Turquoise
TRINITY_DN63_c0_g1	-3.18613	7.12e-05	0.132979	1	tr|A0A446NVM7|A0A446NVM7_TRITD	*-*	Cell division control protein	NA	NA	-0.86958	-0.868649	Turquoise
TRINITY_DN62879_c0_g1	4.33982	5.69e-07	2.77054	0.107481	tr|A0A453P8X2|A0A453P8X2_AEGTS	***	RING-type domain-containing protein	IPR013083 (Zinc finger, RING/FYVE/PHD-type)	NA	0.854081	0.852659	Turquoise
TRINITY_DN62801_c0_g3	7.01277	0.000116168	3.15223	1	NA	NA	Unknown protein	NA	NA	0.806383	0.829137	Turquoise
TRINITY_DN62773_c1_g1	3.21427	0.0114101	0.870586	1	NA	NA	NA	NA	NA	0.948274	0.94454	Turquoise
TRINITY_DN6276_c0_g1	1.04725	1	-0.177933	1	tr|A0A287LU27|A0A287LU27_HORVV	***	Amidohydro-rel domain-containing protein	IPR011778 (Hydantoinase/dihydropyrimidinase), IPR032466 (Metal-dependent hydrolase)	GO:0005737, GO:0016787, GO:0016810	0.926425	0.91698	Turquoise
TRINITY_DN627_c1_g1	1.48575	NA	-3.14201	NA	NA	NA	Unknown protein	NA	NA	0.799154	0.803746	Turquoise
TRINITY_DN6268_c0_g1	1.90692	0.373302	-0.612025	1	NA	NA	Unknown protein	NA	NA	0.876282	0.890017	Turquoise
TRINITY_DN6267_c0_g1	-1.20202	1	0.363364	1	tr|I1IV70|I1IV70_BRADI	***	Protein kinase domain-containing protein	IPR011009 (Protein kinase-like domain), IPR013320 (Concanavalin A-like lectin/glucanase domain)	GO:0004672, GO:0005524, GO:0006468, GO:0016020, GO:0016021	-0.840412	-0.835062	Turquoise
TRINITY_DN6262_c1_g1	3.98859	0.0205104	-0.982858	1	tr|A0A1R3JF53|A0A1R3JF53_COCAP	*-*	Ureide permease	IPR009834 (Ureide permease)	GO:0016020, GO:0016021, GO:0022857, GO:0055085, GO:0071705	0.806254	0.808421	Turquoise
TRINITY_DN62566_c0_g1	1.91732	0.0835855	-0.479103	1	NA	NA	NA	NA	NA	0.922828	0.932785	Turquoise
TRINITY_DN62553_c0_g4	2.04126	1	-4.07458	0.439006	NA	NA	NA	NA	NA	0.787718	0.814412	Turquoise
TRINITY_DN62495_c0_g1	0.595389	1	0.0621721	1	tr|A0A1D6QS01|A0A1D6QS01_MAIZE	***	Negative regulator of systemic acquired resistance (SNI1)	NA	GO:0005634, GO:0006974, GO:0010113, GO:0016570, GO:0030915, GO:0031348, GO:0044212, GO:0045892	0.831586	0.847084	Turquoise
TRINITY_DN6243_c0_g1	4.82539	0.0110505	2.31016	1	NA	NA	NA	NA	NA	0.865897	0.882302	Turquoise
TRINITY_DN62399_c0_g1	0.700781	1	-0.231354	1	NA	NA	NA	NA	NA	0.798685	0.808071	Turquoise
TRINITY_DN6234_c0_g1	-0.697569	1	0.0398287	1	tr|A0A453Q6Q9|A0A453Q6Q9_AEGTS	***	TCP domain-containing protein	IPR005333 (Transcription factor, TCP)	NA	-0.842719	-0.847834	Turquoise
TRINITY_DN6228_c0_g1	1.00998	1	0.406025	1	tr|A0A287T5X7|A0A287T5X7_HORVV	***	RRM domain-containing protein	NA	GO:0003676, GO:0003723	0.813856	0.814514	Turquoise
TRINITY_DN62240_c0_g1	1.97312	0.350587	-0.82457	1	tr|A0A446W3Z1|A0A446W3Z1_TRITD	***	F-box domain-containing protein	IPR001810 (F-box domain)	NA	0.935543	0.935538	Turquoise
TRINITY_DN622_c1_g1	1.97778	0.409442	0.115469	1	NA	NA	NA	NA	NA	0.915779	0.912429	Turquoise
TRINITY_DN6200_c0_g1	-3.68858	2.98e-07	0.173721	1	NA	NA	NA	NA	NA	-0.840191	-0.832518	Turquoise
TRINITY_DN61879_c0_g1	2.46146	0.398998	0.570785	1	NA	NA	NA	NA	NA	0.82591	0.814895	Turquoise
TRINITY_DN6183_c0_g1	2.13955	1	-4.26175	0.466043	tr|A0A446TAW5|A0A446TAW5_TRITD	*-*	Protein kinase domain-containing protein	IPR024788 (Malectin-like carbohydrate-binding domain)	NA	0.810186	0.808654	Turquoise
TRINITY_DN617_c1_g1	0.485852	1	-0.0211679	1	tr|A0A453MF41|A0A453MF41_AEGTS	*-*	AAA domain-containing protein	IPR000642 (Peptidase M41)	NA	0.95866	0.963848	Turquoise
TRINITY_DN61652_c0_g2	5.47923	3.7e-10	-0.381542	1	NA	NA	Unknown protein	NA	NA	0.969736	0.97737	Turquoise
TRINITY_DN616_c1_g1	3.93778	0.625809	1.37676	1	NA	NA	NA	NA	NA	0.828762	0.812526	Turquoise
TRINITY_DN61508_c0_g2	5.92465	0.000267639	4.40381	0.109162	NA	NA	NA	NA	NA	0.778275	0.805731	Turquoise
TRINITY_DN61391_c0_g1	3.24574	0.0306078	-3.92779	0.299447	NA	NA	Unknown protein	NA	NA	0.923316	0.931162	Turquoise
TRINITY_DN613_c0_g1	0.965078	1	0.132993	1	tr|A0A446NQL3|A0A446NQL3_TRITD	***	Lipoyl synthase, mitochondrial	IPR003698 (Lipoyl synthase), IPR007197 (Radical SAM)	NA	0.902619	0.893175	Turquoise
TRINITY_DN6115_c0_g1	0.933568	1	0.0332541	1	tr|A0A1D6M4K3|A0A1D6M4K3_MAIZE	*-*	TPX2 (Targeting protein for Xklp2) protein family	NA	NA	0.804324	0.80572	Turquoise
TRINITY_DN6110_c0_g1	0.937485	1	0.316919	1	tr|A0A3B6JPH4|A0A3B6JPH4_WHEAT	***	Annexin	IPR001464 (Annexin)	NA	0.876762	0.873512	Turquoise
TRINITY_DN60873_c0_g1	7.29545	2.93e-06	0	1	NA	NA	NA	NA	NA	0.874097	0.880486	Turquoise
TRINITY_DN6084_c1_g1	-1.74432	0.159701	0.040214	1	tr|A0A287M906|A0A287M906_HORVV	***	Protein kinase domain-containing protein	IPR011009 (Protein kinase-like domain), IPR013320 (Concanavalin A-like lectin/glucanase domain)	GO:0004672, GO:0005524, GO:0006468, GO:0016020, GO:0016021	-0.822978	-0.816335	Turquoise
TRINITY_DN60839_c0_g1	3.19439	0.0534984	1.37517	1	NA	NA	NA	NA	NA	0.814134	0.808567	Turquoise
TRINITY_DN60804_c0_g1	1.40812	1	-2.04798	1	tr|A0A2X0SBR9|A0A2X0SBR9_WHEAT	***	V-type proton ATPase subunit a	IPR002490 (V-type ATPase, V0 complex, 116kDa subunit family)	GO:0000220, GO:0006811, GO:0015078, GO:0015991, GO:0016020, GO:0016021, GO:0033179	0.811963	0.807782	Turquoise
TRINITY_DN60777_c0_g1	8.43549	8.03e-05	6.22974	0.044259	NA	NA	NA	NA	NA	0.805013	0.810537	Turquoise
TRINITY_DN60747_c0_g3	-11.1163	6.01e-24	-0.172812	1	tr|A0A2K2DRC5|A0A2K2DRC5_BRADI	***	Protein kinase domain-containing protein	IPR001611 (Leucine-rich repeat), IPR003591 (Leucine-rich repeat, typical subtype), IPR011009 (Protein kinase-like domain), IPR013210 (Leucine-rich repeat-containing N-terminal, plant-type), IPR032675 (Leucine-rich repeat domain, L domain-like)	GO:0004672, GO:0005524, GO:0005886, GO:0006468, GO:0016020, GO:0016021	-0.958906	-0.963781	Turquoise
TRINITY_DN60747_c0_g2	-1.00345	1	-0.100451	1	tr|G7K170|G7K170_MEDTR	***	Leucine-rich receptor-like kinase family protein	IPR001611 (Leucine-rich repeat), IPR032675 (Leucine-rich repeat domain, L domain-like)	GO:0016020, GO:0016021, GO:0016301, GO:0016310	-0.892395	-0.893291	Turquoise
TRINITY_DN60704_c0_g1	1.61018	0.650821	0.519487	1	NA	NA	NA	NA	NA	0.849033	0.851908	Turquoise
TRINITY_DN60679_c0_g1	7.35471	1.34e-06	0	1	NA	NA	NA	NA	NA	0.887079	0.908773	Turquoise
TRINITY_DN6067_c0_g1	-1.96251	0.0651913	0.0475582	1	tr|A0A061DV78|A0A061DV78_THECC	***	RNA/RNP complex-1-interacting phosphatase, putative	NA	GO:0016020, GO:0016021	-0.892069	-0.881397	Turquoise
TRINITY_DN60589_c0_g1	2.91279	0.0543776	1.59843	1	NA	NA	NA	NA	NA	0.824761	0.838753	Turquoise
TRINITY_DN6052_c0_g1	-0.696341	1	-0.0368265	1	tr|I1HUR3|I1HUR3_BRADI	***	DEK_C domain-containing protein	IPR009057 (Homeobox domain-like), IPR014876 (DEK, C-terminal)	GO:0005634, GO:0042393, GO:2000779	-0.840017	-0.839097	Turquoise
TRINITY_DN6049_c1_g2	-4.43845	5.56e-06	-0.0333435	1	NA	NA	NA	NA	NA	-0.887409	-0.879053	Turquoise
TRINITY_DN60437_c0_g1	7.16644	4.19e-07	0	1	NA	NA	NA	NA	NA	0.99567	0.990632	Turquoise
TRINITY_DN60428_c0_g1	7.44162	4.67e-08	1.99876	1	tr|A0A453NQI8|A0A453NQI8_AEGTS	***	Reverse transcriptase domain-containing protein	IPR000477 (Reverse transcriptase domain), IPR005135 (Endonuclease/exonuclease/phosphatase)	NA	0.943181	0.94509	Turquoise
TRINITY_DN6038_c0_g1	1.28903	1	-0.854903	1	NA	NA	NA	NA	NA	0.827878	0.838429	Turquoise
TRINITY_DN60329_c0_g1	1.91894	1	-3.05886	0.815137	tr|A0A287EGV5|A0A287EGV5_HORVV	***	NB-ARC domain-containing protein	IPR002182 (NB-ARC), IPR027417 (P-loop containing nucleoside triphosphate hydrolase), IPR032675 (Leucine-rich repeat domain, L domain-like)	GO:0043531	0.868576	0.841393	Turquoise
TRINITY_DN60328_c0_g1	2.77053	0.0160477	1.13775	1	tr|A0A287ERM0|A0A287ERM0_HORVV	*-*	Non-specific serine/threonine protein kinase	IPR011009 (Protein kinase-like domain)	GO:0000166, GO:0004672, GO:0004674, GO:0005524, GO:0006468, GO:0007165, GO:0016301, GO:0016310, GO:0016740	0.928287	0.937901	Turquoise
TRINITY_DN60302_c0_g1	7.76317	5.45e-08	4.83429	0.0380829	NA	NA	Unknown protein	NA	NA	0.875005	0.891089	Turquoise
TRINITY_DN603_c0_g2	1.01797	1	-0.0158572	1	tr|M8CTI8|M8CTI8_AEGTA	***	Phosphate carrier protein, mitochondrial	IPR018108 (Mitochondrial substrate/solute carrier), IPR023395 (Mitochondrial carrier domain)	GO:0009651, GO:0016020, GO:0016021, GO:0022857, GO:0055085	0.893779	0.903418	Turquoise
TRINITY_DN6020_c0_g3	9.15793	1.12e-13	-0.594448	1	tr|A0A287PLK0|A0A287PLK0_HORVV	*-*	HMA domain-containing protein	NA	GO:0030001, GO:0046872	0.925288	0.937337	Turquoise
TRINITY_DN6018_c0_g1	2.40167	0.222034	0.894661	1	tr|M8B1Z7|M8B1Z7_AEGTA	***	SNF1-related protein kinase regulatory subunit gamma 1	IPR000644 (CBS domain)	GO:0016301, GO:0016310	0.852063	0.86792	Turquoise
TRINITY_DN60149_c0_g2	2.16131	0.642969	0.321762	1	NA	NA	NA	NA	NA	0.851776	0.84546	Turquoise
TRINITY_DN6014_c0_g2	0.576839	1	0.0315282	1	tr|A0A453L808|A0A453L808_AEGTS	***	Proteasome subunit beta	IPR001353 (Proteasome, subunit alpha/beta), IPR029055 (Nucleophile aminohydrolases, N-terminal)	NA	0.940896	0.940657	Turquoise
TRINITY_DN60052_c0_g1	1.29222	0.378407	0.641041	1	tr|A0A5A7RBB1|A0A5A7RBB1_STRAF	***	Ribosomal RNA small subunit methyltransferase H	NA	NA	0.895667	0.898655	Turquoise
TRINITY_DN60035_c0_g1	9.50878	1.55e-16	-1.24764	1	NA	NA	NA	NA	NA	0.92351	0.923275	Turquoise
TRINITY_DN5996_c0_g2	0.813337	1	-0.16243	1	tr|A0A0E0MIE3|A0A0E0MIE3_ORYPU	*-*	RHOMBOID-like protein	IPR002610 (Peptidase S54, rhomboid)	GO:0003676, GO:0003723, GO:0004252, GO:0006508, GO:0016020, GO:0016021	0.86667	0.85276	Turquoise
TRINITY_DN599_c0_g1	3.23909	0.805553	0.708761	1	tr|A0A2K3NAK8|A0A2K3NAK8_TRIPR	***	Ty3/gypsy retrotransposon protein	IPR000477 (Reverse transcriptase domain), IPR012337 (Ribonuclease H-like domain), IPR016197 (Chromo domain-like)	GO:0003676, GO:0015074	0.847721	0.847581	Turquoise
TRINITY_DN59802_c2_g1	7.06035	1.25e-05	3.29548	0.88103	NA	NA	NA	NA	NA	0.948825	0.938666	Turquoise
TRINITY_DN598_c0_g2	3.57314	5.26e-20	-0.0540321	1	NA	NA	NA	NA	NA	0.953606	0.963516	Turquoise
TRINITY_DN598_c0_g1	1.20056	1	-3.05007	0.358988	NA	NA	NA	NA	NA	0.829635	0.828732	Turquoise
TRINITY_DN59677_c0_g1	2.1473	0.642536	-0.574505	1	tr|C0PJP0|C0PJP0_MAIZE	***	TIP120 domain-containing protein	IPR016024 (Armadillo-type fold)	GO:0010265	0.848565	0.867088	Turquoise
TRINITY_DN59464_c0_g1	1.47861	1	-1.18104	1	NA	NA	NA	NA	NA	0.78861	0.805239	Turquoise
TRINITY_DN59458_c0_g1	4.49484	0.0410478	2.34573	1	NA	NA	NA	NA	NA	0.878873	0.863745	Turquoise
TRINITY_DN5944_c0_g1	0.659731	1	-0.143394	1	tr|A0A287XB96|A0A287XB96_HORVV	***	t-SNARE coiled-coil homology domain-containing protein	IPR000727 (Target SNARE coiled-coil homology domain), IPR005606 (Sec20)	GO:0016020, GO:0016021	0.879378	0.866554	Turquoise
TRINITY_DN594_c1_g2	2.29969	1	0.739232	1	tr|A0A287S442|A0A287S442_HORVV	***	WRKY domain-containing protein	IPR003657 (WRKY domain), IPR032675 (Leucine-rich repeat domain, L domain-like)	GO:0003677, GO:0003700, GO:0005634, GO:0006355, GO:0043531, GO:0043565	0.847127	0.862295	Turquoise
TRINITY_DN594_c1_g1	2.27434	0.815987	0.605494	1	tr|A0A0E0BM92|A0A0E0BM92_9ORYZ	*-*	Protein kinase domain-containing protein	IPR002182 (NB-ARC), IPR027417 (P-loop containing nucleoside triphosphate hydrolase)	GO:0004672, GO:0005524, GO:0006468, GO:0043531	0.831396	0.841488	Turquoise
TRINITY_DN5936_c1_g3	0.891408	1	0.196346	1	NA	NA	NA	NA	NA	0.82736	0.840378	Turquoise
TRINITY_DN5936_c1_g1	0.52568	1	0.0202005	1	tr|A0A164V0V1|A0A164V0V1_DAUCS	*-*	Glyceraldehyde-3-phosphate dehydrogenase	IPR003823 (Domain of unknown function CP12), IPR020829 (Glyceraldehyde 3-phosphate dehydrogenase, catalytic domain)	GO:0006006, GO:0016491, GO:0016620, GO:0050661, GO:0051287, GO:0055114	0.838258	0.8523	Turquoise
TRINITY_DN5936_c0_g1	0.481468	1	-0.0246446	1	tr|C9EAC1|C9EAC1_FESAR	***	Glyceraldehyde-3-phosphate dehydrogenase	IPR020831 (Glyceraldehyde/Erythrose phosphate dehydrogenase family)	GO:0000166, GO:0006006, GO:0016491, GO:0016620, GO:0050661, GO:0051287, GO:0055114	0.852964	0.851335	Turquoise
TRINITY_DN592_c0_g1	3.22819	0.00998668	-0.800185	1	NA	NA	Unknown protein	NA	NA	0.93932	0.932646	Turquoise
TRINITY_DN59141_c1_g1	2.18484	1	-5.01839	0.161904	NA	NA	NA	NA	NA	0.795449	0.804306	Turquoise
TRINITY_DN5911_c1_g1	1.83575	0.981705	0.516568	1	NA	NA	NA	NA	NA	0.798369	0.818783	Turquoise
TRINITY_DN5911_c0_g1	2.78682	0.978995	0.593053	1	NA	NA	Unknown protein	NA	NA	0.939648	0.947036	Turquoise
TRINITY_DN5903_c0_g1	1.8629	0.768643	0.264237	1	AT5G39080.1	*-*	HXXXD-type acyl-transferase family protein	IPR003480 (Transferase), IPR023213 (Chloramphenicol acetyltransferase-like domain)	NA	0.881301	0.885544	Turquoise
TRINITY_DN59018_c0_g1	-2.66214	2.3e-08	-0.310229	1	tr|A0A2R6RSD9|A0A2R6RSD9_ACTCC	***	IAA-amino acid hydrolase ILR1-like	IPR002933 (Peptidase M20)	GO:0016787	-0.953379	-0.95569	Turquoise
TRINITY_DN58871_c0_g2	2.05916	0.427171	0.093341	1	NA	NA	NA	NA	NA	0.832405	0.858355	Turquoise
TRINITY_DN58870_c0_g1	5.37998	0.0106517	0.14154	1	NA	NA	NA	NA	NA	0.830209	0.853635	Turquoise
TRINITY_DN5886_c0_g2	1.08565	1	-0.0307765	1	tr|A0A061FD55|A0A061FD55_THECC	***	Cytochrome P450	IPR001128 (Cytochrome P450)	GO:0004497, GO:0005506, GO:0016491, GO:0016705, GO:0020037, GO:0046872, GO:0055114	0.891992	0.888645	Turquoise
TRINITY_DN58719_c0_g1	3.22653	0.947868	-1.42876	1	NA	NA	NA	NA	NA	0.88551	0.874457	Turquoise
TRINITY_DN58681_c0_g1	6.60503	1.5e-05	-0.600618	1	tr|A0A368R5K7|A0A368R5K7_SETIT	*-*	ATP-dependent DNA helicase	NA	GO:0000723, GO:0003678, GO:0006281, GO:0032508	0.918597	0.898299	Turquoise
TRINITY_DN58660_c0_g1	3.23328	0.30847	0.612769	1	NA	NA	NA	NA	NA	0.875103	0.867232	Turquoise
TRINITY_DN5866_c1_g1	2.59433	0.00975149	0.530171	1	NA	NA	Unknown protein	NA	NA	0.93804	0.936155	Turquoise
TRINITY_DN58598_c0_g1	2.02368	0.171779	0.8072	1	tr|Q10S01|Q10S01_ORYSJ	*-*	Cytochrome P450 family protein, expressed	IPR001128 (Cytochrome P450)	GO:0004497, GO:0005506, GO:0016020, GO:0016021, GO:0016491, GO:0016705, GO:0020037, GO:0046872, GO:0055114	0.864271	0.857643	Turquoise
TRINITY_DN58585_c0_g1	6.16787	0.000665395	0	1	NA	NA	NA	NA	NA	0.889482	0.878869	Turquoise
TRINITY_DN58476_c0_g1	3.01567	0.209908	-0.246067	1	NA	NA	Unknown protein	NA	NA	0.874888	0.874711	Turquoise
TRINITY_DN58466_c0_g2	2.77609	0.454456	0.111339	1	NA	NA	Unknown protein	NA	NA	0.877231	0.875819	Turquoise
TRINITY_DN58459_c0_g1	2.62705	0.265304	-1.06605	1	NA	NA	Unknown protein	NA	NA	0.912014	0.916408	Turquoise
TRINITY_DN58415_c1_g1	3.20545	0.07342	-0.169794	1	NA	NA	NA	NA	NA	0.946781	0.952989	Turquoise
TRINITY_DN58254_c0_g1	7.01654	2.12e-05	0	1	NA	NA	NA	NA	NA	0.854708	0.839486	Turquoise
TRINITY_DN580_c0_g1	1.89126	0.129393	0.410579	1	NA	NA	Unknown protein	NA	NA	0.895768	0.896432	Turquoise
TRINITY_DN57901_c0_g2	5.90693	0.0073223	2.59169	1	NA	NA	NA	NA	NA	0.89609	0.876482	Turquoise
TRINITY_DN57690_c0_g1	2.90735	0.00789968	1.39377	1	NA	NA	NA	NA	NA	0.82788	0.851871	Turquoise
TRINITY_DN5762_c1_g2	9.06859	1.07e-11	0.563602	1	NA	NA	Unknown protein	NA	NA	0.88397	0.892649	Turquoise
TRINITY_DN57615_c0_g1	3.83769	0.0535361	1.2033	1	NA	NA	NA	NA	NA	0.908727	0.897084	Turquoise
TRINITY_DN57532_c0_g1	7.77464	0.0122779	3.86528	1	NA	NA	NA	NA	NA	0.863345	0.875542	Turquoise
TRINITY_DN57412_c0_g1	2.15059	0.227455	-0.38914	1	tr|A0A0Q3F3L3|A0A0Q3F3L3_BRADI	***	F-box domain-containing protein	NA	NA	0.939729	0.929804	Turquoise
TRINITY_DN574_c0_g1	-0.53827	1	0.0199173	1	tr|A0A3B6CGR6|A0A3B6CGR6_WHEAT	***	Mevalonate kinase	IPR006206 (Mevalonate/galactokinase)	NA	-0.805387	-0.821885	Turquoise
TRINITY_DN57336_c0_g2	3.62177	0.0357897	1.52503	1	NA	NA	NA	NA	NA	0.908204	0.914248	Turquoise
TRINITY_DN57258_c0_g1	6.14683	1.65e-06	-1.5783	1	tr|A0A2K2CNG7|A0A2K2CNG7_BRADI	*-*	zf-RVT domain-containing protein	IPR026960 (Reverse transcriptase zinc-binding domain)	NA	0.907099	0.894937	Turquoise
TRINITY_DN5725_c0_g1	2.54551	1	-0.837435	1	NA	NA	NA	NA	NA	0.877228	0.871404	Turquoise
TRINITY_DN57062_c0_g1	2.32852	0.824436	-1.9482	1	tr|A5BBI5|A5BBI5_VITVI	*-*	Fe2OG dioxygenase domain-containing protein	NA	GO:0016491, GO:0055114	0.831779	0.840589	Turquoise
TRINITY_DN57011_c0_g1	6.08255	0.000608242	0	1	NA	NA	NA	NA	NA	0.925496	0.924793	Turquoise
TRINITY_DN57_c0_g1	0.877153	1	-0.191688	1	NA	NA	NA	NA	NA	0.850104	0.851886	Turquoise
TRINITY_DN5699_c0_g2	-1.13005	1	0.10276	1	tr|Q10MT8|Q10MT8_ORYSJ	***	Gamma interferon inducible lysosomal thiol reductase family protein, expressed	IPR004911 (Gamma interferon inducible lysosomal thiol reductase GILT)	GO:0005773	-0.862655	-0.840128	Turquoise
TRINITY_DN5699_c0_g1	-1.08075	1	0.133895	1	NA	NA	NA	NA	NA	-0.913795	-0.891053	Turquoise
TRINITY_DN5692_c0_g1	3.28296	1	-5.53688	0.615957	NA	NA	NA	NA	NA	0.88038	0.893534	Turquoise
TRINITY_DN5679_c1_g2	2.95384	0.558724	0.112201	1	NA	NA	Unknown protein	NA	NA	0.972991	0.975401	Turquoise
TRINITY_DN56767_c0_g1	6.35245	8.28e-05	0	1	NA	NA	NA	NA	NA	0.994046	0.996597	Turquoise
TRINITY_DN56744_c0_g1	-5.38265	0.00117109	0.320019	1	tr|A0A3B6AY38|A0A3B6AY38_WHEAT	*-*	Lipase	IPR029058 (Alpha/Beta hydrolase fold)	NA	-0.803114	-0.804587	Turquoise
TRINITY_DN56691_c0_g1	6.76897	5.02e-06	4.55098	0.0658625	NA	NA	NA	NA	NA	0.8871	0.899449	Turquoise
TRINITY_DN5667_c0_g1	0.606677	1	0.205139	1	tr|A0A287IEE1|A0A287IEE1_HORVV	*-*	NAD(P)-bd_dom domain-containing protein	IPR016040 (NAD(P)-binding domain)	GO:0006979, GO:0009507, GO:0009579, GO:0010287	0.850348	0.864359	Turquoise
TRINITY_DN56630_c0_g1	2.34014	0.627726	-0.383618	1	NA	NA	NA	NA	NA	0.795974	0.802897	Turquoise
TRINITY_DN5662_c2_g1	1.58969	0.920688	-1.12193	1	tr|R7W9I3|R7W9I3_AEGTA	*-*	TF-B3 domain-containing protein	NA	GO:0003677, GO:0005634	0.855803	0.847528	Turquoise
TRINITY_DN56612_c1_g1	3.0314	0.191627	-0.299671	1	NA	NA	Unknown protein	NA	NA	0.885584	0.899223	Turquoise
TRINITY_DN56608_c0_g1	1.81628	0.762404	0.0801559	1	NA	NA	NA	NA	NA	0.848052	0.858004	Turquoise
TRINITY_DN5657_c1_g2	1.41554	1	-2.29818	1	NA	NA	NA	NA	NA	0.824757	0.802011	Turquoise
TRINITY_DN56512_c0_g1	1.7702	0.904595	-0.257007	1	NA	NA	NA	NA	NA	0.879849	0.878612	Turquoise
TRINITY_DN56300_c0_g1	1.33519	1	-1.13491	1	NA	NA	NA	NA	NA	0.861695	0.854781	Turquoise
TRINITY_DN5627_c0_g1	-0.494335	1	0.0555511	1	tr|A0A1R3H4U2|A0A1R3H4U2_9ROSI	*-*	Casein kinase substrate, phosphoprotein PP28	NA	GO:0016020, GO:0016021, GO:0016301, GO:0016310	-0.842514	-0.837612	Turquoise
TRINITY_DN5623_c0_g2	0.533487	1	-0.191591	1	tr|F2D0Z1|F2D0Z1_HORVV	***	3-ketoacyl-CoA synthase	IPR012392 (Very-long-chain 3-ketoacyl-CoA synthase), IPR016039 (Thiolase-like)	GO:0003824, GO:0006633, GO:0016020, GO:0016740, GO:0016746, GO:0016747	0.828945	0.81912	Turquoise
TRINITY_DN5614_c1_g1	6.56058	0.000100022	0	1	NA	NA	Unknown protein	NA	NA	0.891013	0.90571	Turquoise
TRINITY_DN5596_c0_g1	2.13982	0.816249	0.783315	1	tr|A0A453HC07|A0A453HC07_AEGTS	*-*	GRAM domain-containing protein	IPR004182 (GRAM domain)	NA	0.822581	0.834148	Turquoise
TRINITY_DN55867_c0_g2	3.13114	0.177859	0.540907	1	NA	NA	NA	NA	NA	0.886651	0.908951	Turquoise
TRINITY_DN5579_c0_g1	0.470782	1	-0.298485	1	tr|A0A0D3GNC7|A0A0D3GNC7_9ORYZ	*-*	NAC domain-containing protein	IPR022059 (Protein of unknown function DUF3615)	GO:0003677, GO:0005634, GO:0006355	0.876616	0.849449	Turquoise
TRINITY_DN5563_c0_g3	10.5097	1.6e-16	4.81149	0.0327934	NA	NA	Unknown protein	NA	NA	0.880428	0.879373	Turquoise
TRINITY_DN55594_c0_g1	2.21452	0.480658	0.774094	1	NA	NA	Unknown protein	NA	NA	0.8427	0.839427	Turquoise
TRINITY_DN55586_c0_g1	2.5883	0.06264	1.0875	1	tr|A0A453QLL4|A0A453QLL4_AEGTS	*-*	Fe2OG dioxygenase domain-containing protein	IPR026992 (Non-haem dioxygenase N-terminal domain), IPR027443 (Isopenicillin N synthase-like)	NA	0.860956	0.849877	Turquoise
TRINITY_DN55533_c0_g4	1.73397	1	-2.63438	1	NA	NA	NA	NA	NA	0.853019	0.841412	Turquoise
TRINITY_DN55520_c0_g1	3.88874	0.00742347	2.24858	1	NA	NA	NA	NA	NA	0.835933	0.860662	Turquoise
TRINITY_DN5542_c0_g1	1.31064	0.549399	0.285584	1	tr|A0A3B6QD68|A0A3B6QD68_WHEAT	*-*	NB-ARC domain-containing protein	IPR032675 (Leucine-rich repeat domain, L domain-like)	NA	0.946345	0.946599	Turquoise
TRINITY_DN55398_c0_g1	6.22187	0.0124905	0	1	NA	NA	NA	NA	NA	0.818637	0.836245	Turquoise
TRINITY_DN55395_c0_g1	7.48692	1.02e-07	0	1	NA	NA	NA	NA	NA	0.959268	0.963319	Turquoise
TRINITY_DN55383_c0_g1	5.82621	0.0023329	0.569768	1	NA	NA	NA	NA	NA	0.87276	0.869132	Turquoise
TRINITY_DN55376_c0_g1	-4.32057	2.74e-08	-0.364761	1	tr|A0A0D9WRX6|A0A0D9WRX6_9ORYZ	*-*	F-box domain-containing protein	IPR001611 (Leucine-rich repeat), IPR006553 (Leucine-rich repeat, cysteine-containing subtype), IPR032675 (Leucine-rich repeat domain, L domain-like)	NA	-0.848313	-0.857464	Turquoise
TRINITY_DN55318_c0_g1	1.94489	0.227006	0.790687	1	NA	NA	Unknown protein	NA	NA	0.828664	0.83929	Turquoise
TRINITY_DN55306_c0_g1	2.76195	0.0578529	-0.453674	1	NA	NA	NA	NA	NA	0.948461	0.956065	Turquoise
TRINITY_DN55090_c0_g2	1.32281	1	0.252302	1	tr|A0A287W979|A0A287W979_HORVV	***	Telomerase reverse transcriptase	IPR003545 (Telomerase reverse transcriptase), IPR021891 (Telomerase ribonucleoprotein complex - RNA-binding domain)	GO:0000781, GO:0003677, GO:0003721, GO:0003964, GO:0005634, GO:0005694, GO:0006278, GO:0016740, GO:0016779, GO:0046872	0.856391	0.840723	Turquoise
TRINITY_DN5508_c0_g2	0.782975	1	0.126953	1	tr|A0A453C142|A0A453C142_AEGTS	***	DDT domain-containing protein	IPR013136 (WSTF/Acf1/Cbp146), IPR018501 (DDT domain), IPR028941 (WHIM2 domain), IPR028942 (WHIM1 domain)	NA	0.926574	0.92899	Turquoise
TRINITY_DN5505_c0_g1	-3.05918	2.28e-07	-0.133171	1	tr|A0A077DCM4|A0A077DCM4_TOBAC	*-*	Metal transporter	IPR001046 (NRAMP family)	GO:0016020, GO:0016021, GO:0030001, GO:0046873	-0.837518	-0.837196	Turquoise
TRINITY_DN5497_c0_g1	1.02234	1	-0.0280523	1	tr|M0X4N3|M0X4N3_HORVV	*-*	NB-ARC domain-containing protein	IPR002182 (NB-ARC), IPR027417 (P-loop containing nucleoside triphosphate hydrolase)	GO:0043531	0.855846	0.849878	Turquoise
TRINITY_DN54828_c0_g1	7.23125	2.69e-06	0	1	NA	NA	NA	NA	NA	0.889909	0.88659	Turquoise
TRINITY_DN5468_c2_g1	0.547332	1	0.15204	1	tr|A0A3L6FHR3|A0A3L6FHR3_MAIZE	***	Photosystem II reaction center W protein, chloroplastic	IPR009806 (Photosystem II PsbW, class 2)	NA	0.787902	0.809431	Turquoise
TRINITY_DN5468_c0_g2	2.50275	0.276909	-0.561193	1	NA	NA	NA	NA	NA	0.933298	0.928782	Turquoise
TRINITY_DN54672_c0_g1	3.02451	0.125985	0.105533	1	NA	NA	Unknown protein	NA	NA	0.91188	0.907487	Turquoise
TRINITY_DN54603_c0_g1	4.69868	0.00336155	2.38875	1	NA	NA	NA	NA	NA	0.908484	0.908092	Turquoise
TRINITY_DN5455_c1_g1	-1.97261	0.0516083	-0.585329	1	NA	NA	Unknown protein	NA	NA	-0.800337	-0.817179	Turquoise
TRINITY_DN54545_c0_g1	7.50667	9.26e-07	2.16666	1	NA	NA	Unknown protein	NA	NA	0.939038	0.938092	Turquoise
TRINITY_DN5452_c0_g1	2.98687	0.00944168	0.853818	1	tr|A0A3B6NL17|A0A3B6NL17_WHEAT	*-*	ULP_PROTEASE domain-containing protein	NA	NA	0.962026	0.966872	Turquoise
TRINITY_DN545_c0_g2	0.641896	1	0.246354	1	AT2G46420.1	***	Plant protein 1589 of unknown function	IPR006476 (Conserved hypothetical protein CHP01589, plant)	NA	0.858816	0.855814	Turquoise
TRINITY_DN54410_c0_g1	1.65954	1	-0.22446	1	tr|A0A3B6KKN5|A0A3B6KKN5_WHEAT	*-*	NB-ARC domain-containing protein	IPR002182 (NB-ARC)	NA	0.866825	0.863601	Turquoise
TRINITY_DN544_c1_g1	1.99518	0.38818	-0.335913	1	NA	NA	NA	NA	NA	0.930477	0.922018	Turquoise
TRINITY_DN54346_c0_g1	3.51418	0.0203332	0.777096	1	NA	NA	Unknown protein	NA	NA	0.955386	0.96538	Turquoise
TRINITY_DN54220_c0_g1	5.47455	0.00184775	1.1907	1	NA	NA	NA	NA	NA	0.930709	0.913042	Turquoise
TRINITY_DN54204_c0_g1	2.40515	0.221062	0.820941	1	tr|A0A3B6TEV3|A0A3B6TEV3_WHEAT	***	FKS1_dom1 domain-containing protein	IPR003440 (Glycosyl transferase, family 48)	NA	0.825879	0.819376	Turquoise
TRINITY_DN5419_c0_g1	1.04954	1	-0.275654	1	tr|A0A287R1W7|A0A287R1W7_HORVV	***	AB hydrolase-1 domain-containing protein	IPR000639 (Epoxide hydrolase-like), IPR029058 (Alpha/Beta hydrolase fold)	GO:0003824	0.958302	0.957646	Turquoise
TRINITY_DN5418_c1_g2	2.77519	0.536768	0.319841	1	NA	NA	NA	NA	NA	0.866753	0.872054	Turquoise
TRINITY_DN5418_c0_g1	3.17424	NA	0.598865	NA	NA	NA	NA	NA	NA	0.913157	0.917869	Turquoise
TRINITY_DN54140_c0_g1	4.95486	0.000563369	3.25262	0.335997	NA	NA	Unknown protein	NA	NA	0.829167	0.84576	Turquoise
TRINITY_DN5407_c2_g1	1.35215	0.908319	0.482261	1	tr|I1II31|I1II31_BRADI	***	MFS domain-containing protein	IPR005828 (Major facilitator, sugar transporter-like), IPR020846 (Major facilitator superfamily domain)	GO:0005215, GO:0005351, GO:0005887, GO:0016020, GO:0016021, GO:0022857, GO:0034219, GO:0055085, GO:1902600	0.830541	0.861366	Turquoise
TRINITY_DN54063_c0_g2	6.79526	1.51e-05	3.66381	0.442182	tr|B9F9E3|B9F9E3_ORYSJ	***	SWIM-type domain-containing protein	IPR007527 (Zinc finger, SWIM-type), IPR018289 (MULE transposase domain), IPR031052 (FHY3/FAR1 family)	GO:0006355, GO:0008270	0.975908	0.975001	Turquoise
TRINITY_DN5406_c0_g1	-0.530428	1	-0.0709635	1	tr|I1ICN4|I1ICN4_BRADI	***	DUF1084 domain-containing protein	IPR009457 (Domain of unknown function DUF1084)	GO:0016020, GO:0016021	-0.837818	-0.820729	Turquoise
TRINITY_DN53982_c0_g1	7.18015	7.93e-06	0	1	NA	NA	NA	NA	NA	0.886955	0.870975	Turquoise
TRINITY_DN53975_c0_g1	5.55308	0.00381546	-0.583187	1	NA	NA	NA	NA	NA	0.873095	0.85833	Turquoise
TRINITY_DN53711_c0_g1	4.39528	0.0264635	2.64189	1	tr|A0A3B6MK95|A0A3B6MK95_WHEAT	*-*	CCHC-type domain-containing protein	NA	NA	0.854504	0.850137	Turquoise
TRINITY_DN53693_c0_g3	2.28039	0.147577	1.14991	1	NA	NA	NA	NA	NA	0.801294	0.817461	Turquoise
TRINITY_DN535_c0_g1	0.673257	1	0.030444	1	tr|A0A453N5P8|A0A453N5P8_AEGTS	***	NPH3 domain-containing protein	IPR011333 (SKP1/BTB/POZ domain), IPR027356 (NPH3 domain), IPR029959 (Root phototropism protein 3-like)	NA	0.832367	0.842832	Turquoise
TRINITY_DN53495_c0_g1	4.68019	0.000418084	-2.12371	1	NA	NA	NA	NA	NA	0.966438	0.972878	Turquoise
TRINITY_DN5346_c0_g1	0.670277	1	0.0696423	1	tr|B4G1B0|B4G1B0_MAIZE	***	Remorin	IPR005516 (Remorin, C-terminal), IPR005518 (Remorin, N-terminal)	NA	0.825318	0.834745	Turquoise
TRINITY_DN53286_c0_g6	11.7014	5.11e-63	0.393364	1	NA	NA	Unknown protein	NA	NA	0.971313	0.977954	Turquoise
TRINITY_DN53101_c0_g1	2.63021	0.0204677	0.334575	1	NA	NA	NA	NA	NA	0.950293	0.94806	Turquoise
TRINITY_DN531_c0_g2	1.43042	1	0.437409	1	tr|M7ZPE7|M7ZPE7_TRIUA	*-*	Coatomer subunit beta'-2	IPR008962 (PapD-like), IPR015943 (WD40/YVTN repeat-like-containing domain)	GO:0004672, GO:0005524, GO:0006468	0.80154	0.806999	Turquoise
TRINITY_DN5300_c0_g3	1.19052	1	0.391434	1	NA	NA	NA	NA	NA	0.794393	0.804181	Turquoise
TRINITY_DN52742_c1_g1	7.65335	1.28e-05	5.59935	0.0259684	NA	NA	NA	NA	NA	0.839622	0.826984	Turquoise
TRINITY_DN5274_c0_g3	2.60517	0.891619	0.312824	1	NA	NA	Unknown protein	NA	NA	0.890958	0.901627	Turquoise
TRINITY_DN5272_c0_g1	0.408639	1	0.0876901	1	tr|A0A3B6MW56|A0A3B6MW56_WHEAT	***	Fes1 domain-containing protein	IPR016024 (Armadillo-type fold)	NA	0.769163	0.80003	Turquoise
TRINITY_DN52701_c0_g1	6.40391	0.00237581	2.80677	1	NA	NA	NA	NA	NA	0.879014	0.885619	Turquoise
TRINITY_DN52654_c0_g1	3.11264	0.214532	-0.466212	1	NA	NA	NA	NA	NA	0.847016	0.855586	Turquoise
TRINITY_DN52642_c0_g5	8.4008	1.14e-10	0	1	NA	NA	NA	NA	NA	0.958121	0.966438	Turquoise
TRINITY_DN5261_c0_g1	0.648379	1	-0.344509	1	tr|A0A1D6LHY8|A0A1D6LHY8_MAIZE	***	Pseudouridine synthase family protein	IPR002501 (Pseudouridine synthase II, N-terminal), IPR014780 (tRNA pseudouridine synthase II, TruB), IPR020103 (Pseudouridine synthase, catalytic domain)	GO:0001522, GO:0003723, GO:0006396, GO:0009451, GO:0009982	0.906521	0.886158	Turquoise
TRINITY_DN52594_c0_g1	4.99881	0.00399968	2.54573	1	NA	NA	NA	NA	NA	0.870123	0.874501	Turquoise
TRINITY_DN52390_c0_g1	2.70561	0.761017	0.937711	1	tr|A0A5B9T617|A0A5B9T617_LOLRI	*-*	Phytoene desaturase	IPR023753 (FAD/NAD(P)-binding domain)	NA	0.826431	0.818843	Turquoise
TRINITY_DN52378_c0_g1	0.460818	1	-0.152968	1	tr|J3LEH2|J3LEH2_ORYBR	*-*	Glucose-6-phosphate 1-dehydrogenase	IPR001282 (Glucose-6-phosphate dehydrogenase)	GO:0004345, GO:0005975, GO:0006006, GO:0006098, GO:0016491, GO:0050661, GO:0055114	0.825651	0.819662	Turquoise
TRINITY_DN52364_c0_g1	-7.17908	1.87e-07	0.201683	1	NA	NA	NA	NA	NA	-0.837801	-0.834381	Turquoise
TRINITY_DN52347_c0_g1	3.64609	0.060805	-0.659636	1	tr|B8AMT3|B8AMT3_ORYSI	***	Reverse transcriptase Ty1/copia-type domain-containing protein	IPR013103 (Reverse transcriptase, RNA-dependent DNA polymerase)	GO:0000943	0.905262	0.89942	Turquoise
TRINITY_DN5233_c0_g2	6.56973	NA	3.75055	NA	NA	NA	Unknown protein	NA	NA	0.934145	0.935539	Turquoise
TRINITY_DN5233_c0_g1	5.01028	0.000172607	3.19856	0.304689	NA	NA	NA	NA	NA	0.832318	0.83007	Turquoise
TRINITY_DN52317_c0_g1	3.50703	0.000692477	1.48821	1	tr|F2CR16|F2CR16_HORVV	*-*	Fructose-bisphosphate aldolase	IPR000741 (Fructose-bisphosphate aldolase, class-I), IPR013785 (Aldolase-type TIM barrel), IPR029768 (Fructose-bisphosphate aldolase class-I active site)	GO:0003824, GO:0004332, GO:0006096, GO:0016829	0.910144	0.922027	Turquoise
TRINITY_DN5227_c0_g1	0.379456	1	-0.155885	1	tr|A0A0D9WJD9|A0A0D9WJD9_9ORYZ	***	acidPPc domain-containing protein	IPR000326 (Phosphatidic acid phosphatase type 2/haloperoxidase)	GO:0016020, GO:0016021	0.808578	0.808701	Turquoise
TRINITY_DN522_c0_g1	1.2085	1	0.192167	1	NA	NA	Unknown protein	NA	NA	0.873615	0.881369	Turquoise
TRINITY_DN5210_c2_g1	7.07435	3.09e-05	4.51397	0.161349	NA	NA	NA	NA	NA	0.855759	0.852828	Turquoise
TRINITY_DN5210_c0_g1	1.39324	0.94376	-0.522573	1	NA	NA	Unknown protein	NA	NA	0.899128	0.897372	Turquoise
TRINITY_DN52079_c1_g1	4.39847	0.257924	1.39686	1	tr|I1QFT5|I1QFT5_ORYGL	***	TTF-type domain-containing protein	IPR006580 (Zinc finger, TTF-type), IPR008906 (HAT, C-terminal dimerisation domain), IPR012337 (Ribonuclease H-like domain), IPR025398 (Domain of unknown function DUF4371)	GO:0046983	0.906818	0.897896	Turquoise
TRINITY_DN52066_c0_g1	-6.37855	8.58e-06	0.423865	1	NA	NA	Unknown protein	NA	NA	-0.827567	-0.82222	Turquoise
TRINITY_DN52061_c0_g1	0.972677	1	0.00524715	1	NA	NA	Unknown protein	NA	NA	0.901638	0.912138	Turquoise
TRINITY_DN5194_c0_g1	2.33611	0.000865512	0.754748	1	tr|A0A1D6FKI0|A0A1D6FKI0_MAIZE	***	FtsJ-like methyltransferase family protein	IPR015507 (Ribosomal RNA large subunit methyltransferase E), IPR024576 (Ribosomal RNA methyltransferase Spb1, domain of unknown function DUF3381), IPR029063 (S-adenosyl-L-methionine-dependent methyltransferase)	GO:0001510, GO:0008168, GO:0016740, GO:0032259	0.940729	0.942394	Turquoise
TRINITY_DN5192_c0_g2	0.940458	1	0.219145	1	tr|A0A3L6FSA8|A0A3L6FSA8_MAIZE	***	Protein COFACTOR ASSEMBLY OF COMPLEX C SUBUNIT B CCB4, chloroplastic	IPR021325 (Cofactor assembly of complex C subunit B, CCB2/CCB4)	NA	0.888259	0.891896	Turquoise
TRINITY_DN51886_c0_g1	7.66384	4.18e-07	5.44553	0.00855116	NA	NA	NA	NA	NA	0.824946	0.838867	Turquoise
TRINITY_DN51741_c0_g1	6.20047	0.000803994	0	1	NA	NA	Unknown protein	NA	NA	0.89301	0.89366	Turquoise
TRINITY_DN517_c3_g1	1.35517	1	-0.108667	1	tr|A0A453FSK6|A0A453FSK6_AEGTS	***	NAC domain-containing protein	IPR003441 (NAC domain)	NA	0.839199	0.831388	Turquoise
TRINITY_DN51640_c0_g1	1.04442	1	0.0266528	1	NA	NA	NA	NA	NA	0.896517	0.903634	Turquoise
TRINITY_DN5163_c0_g1	0.292841	1	-0.0124978	1	tr|A0A2R6S378|A0A2R6S378_ACTCC	***	ATP-dependent zinc metalloprotease	NA	GO:0004222, GO:0005524, GO:0006508, GO:0008233, GO:0008237, GO:0016020, GO:0016021	0.811303	0.810882	Turquoise
TRINITY_DN5161_c0_g1	0.800389	1	-0.289956	1	tr|A0A1D6ML76|A0A1D6ML76_MAIZE	***	DUF674 family protein	IPR007750 (Protein of unknown function DUF674)	NA	0.856611	0.847254	Turquoise
TRINITY_DN51592_c0_g1	2.41248	0.0033	0.447371	1	NA	NA	Unknown protein	NA	NA	0.95954	0.964144	Turquoise
TRINITY_DN51583_c0_g1	3.2693	0.0239118	-1.62447	1	NA	NA	NA	NA	NA	0.915619	0.896179	Turquoise
TRINITY_DN51572_c0_g1	3.01999	0.202895	0.286553	1	NA	NA	NA	NA	NA	0.872812	0.889122	Turquoise
TRINITY_DN51451_c0_g1	1.03292	1	0.318078	1	tr|A0A0B0PUI4|A0A0B0PUI4_GOSAR	***	Alpha-2-macroglobulin	NA	NA	0.832228	0.846936	Turquoise
TRINITY_DN51449_c0_g1	1.44463	1	-0.142067	1	NA	NA	NA	NA	NA	0.874471	0.857203	Turquoise
TRINITY_DN5144_c0_g1	2.00742	0.099804	-0.700636	1	NA	NA	NA	NA	NA	0.931731	0.934476	Turquoise
TRINITY_DN51405_c0_g1	6.1563	0.000387694	0	1	NA	NA	NA	NA	NA	0.953574	0.950156	Turquoise
TRINITY_DN514_c0_g2	3.42564	0.285356	0.468961	1	NA	NA	NA	NA	NA	0.902814	0.902822	Turquoise
TRINITY_DN51357_c0_g2	0.73488	1	-0.513443	1	tr|A0A287TRC6|A0A287TRC6_HORVV	*-*	DNA-directed RNA polymerase subunit beta	IPR015712 (DNA-directed RNA polymerase, subunit 2)	GO:0003677, GO:0003899, GO:0006351, GO:0009561, GO:0016740, GO:0016779, GO:0032549	0.817171	0.812158	Turquoise
TRINITY_DN51264_c0_g1	2.53996	0.360561	-0.313145	1	NA	NA	NA	NA	NA	0.829595	0.844628	Turquoise
TRINITY_DN5121_c0_g1	-1.15302	1	0.125004	1	tr|A0A2N9IYW9|A0A2N9IYW9_FAGSY	***	Reverse transcriptase domain-containing protein	IPR000477 (Reverse transcriptase domain), IPR012337 (Ribonuclease H-like domain), IPR026960 (Reverse transcriptase zinc-binding domain)	GO:0003676, GO:0004523, GO:0090502	-0.884739	-0.886853	Turquoise
TRINITY_DN51189_c0_g1	2.18065	0.859595	-1.79856	1	NA	NA	NA	NA	NA	0.820004	0.842596	Turquoise
TRINITY_DN5117_c0_g1	1.95517	0.0845927	-0.472673	1	NA	NA	NA	NA	NA	0.975044	0.971797	Turquoise
TRINITY_DN51082_c0_g1	3.27376	0.0509373	0.30523	1	NA	NA	NA	NA	NA	0.931098	0.925101	Turquoise
TRINITY_DN50996_c0_g2	-6.5522	3.98e-06	-0.403089	1	NA	NA	NA	NA	NA	-0.876947	-0.87992	Turquoise
TRINITY_DN50990_c0_g1	2.2441	0.873415	0.418156	1	NA	NA	NA	NA	NA	0.813714	0.831288	Turquoise
TRINITY_DN5097_c0_g1	0.932681	1	0.0416977	1	tr|A0A287LBF8|A0A287LBF8_HORVV	***	Origin of replication complex subunit 4	IPR016527 (Origin recognition complex subunit 4), IPR027417 (P-loop containing nucleoside triphosphate hydrolase), IPR032705 (Origin recognition complex subunit 4, C-terminal)	GO:0000808, GO:0003677, GO:0005634, GO:0006260	0.874631	0.863823	Turquoise
TRINITY_DN50952_c0_g1	4.78198	0.000674944	-0.428246	1	tr|A0A446P4A9|A0A446P4A9_TRITD	*-*	Protein kinase domain-containing protein	NA	NA	0.976273	0.974231	Turquoise
TRINITY_DN50935_c0_g1	4.10744	2e-05	-0.676596	1	NA	NA	NA	NA	NA	0.866226	0.881754	Turquoise
TRINITY_DN50911_c0_g1	-5.57395	1.35e-09	0.193619	1	NA	NA	Unknown protein	NA	NA	-0.820767	-0.823208	Turquoise
TRINITY_DN509_c0_g2	1.81306	1	-0.743415	1	tr|F2DZN2|F2DZN2_HORVV	*-*	diacylglycerol kinase	NA	GO:0000166, GO:0003951, GO:0004143, GO:0005524, GO:0007165, GO:0007205, GO:0016301, GO:0016310, GO:0016740	0.888797	0.883678	Turquoise
TRINITY_DN50784_c2_g1	8.94479	9.01e-12	0	1	NA	NA	NA	NA	NA	0.894982	0.902451	Turquoise
TRINITY_DN50746_c0_g1	6.24115	0.00704225	2.84296	1	tr|M7ZNZ9|M7ZNZ9_TRIUA	*-*	Autophagy-related protein 2	NA	GO:0006914, GO:0030242	0.895234	0.887062	Turquoise
TRINITY_DN50735_c0_g1	5.94664	0.00166955	0	1	tr|B9F677|B9F677_ORYSJ	*-*	Protein DETOXIFICATION	NA	GO:0006855, GO:0015238, GO:0015297, GO:0016020, GO:0016021, GO:0055085	0.905016	0.893812	Turquoise
TRINITY_DN5070_c0_g1	1.59544	0.55297	0.0466098	1	tr|A0A453QES4|A0A453QES4_AEGTS	*-*	Protein kinase domain-containing protein	IPR011009 (Protein kinase-like domain)	NA	0.923234	0.9119	Turquoise
TRINITY_DN50648_c0_g2	1.77784	0.352536	0.289154	1	NA	NA	NA	NA	NA	0.872697	0.86434	Turquoise
TRINITY_DN50642_c0_g1	2.77443	0.374322	-0.743381	1	NA	NA	Unknown protein	NA	NA	0.936503	0.94116	Turquoise
TRINITY_DN5058_c0_g1	0.704668	1	0.0757527	1	sp|Q0IWM5|NDX1_ORYSJ	***	Protein NEOXANTHIN-DEFICIENT 1	IPR023375 (Acetoacetate decarboxylase beta barrel domain)	NA	0.812642	0.809508	Turquoise
TRINITY_DN50563_c1_g1	7.43052	3.34e-05	4.34832	0.29255	NA	NA	NA	NA	NA	0.956624	0.957944	Turquoise
TRINITY_DN50556_c0_g1	5.93171	0.000798595	-0.593175	1	NA	NA	NA	NA	NA	0.889515	0.887279	Turquoise
TRINITY_DN5042_c1_g2	2.36476	0.991553	-0.733761	1	NA	NA	Unknown protein	NA	NA	0.822153	0.825155	Turquoise
TRINITY_DN50325_c0_g2	0.51965	1	0.16028	1	tr|A0A3L6T696|A0A3L6T696_PANMI	***	Protein FLX-like 1	NA	NA	0.860907	0.850356	Turquoise
TRINITY_DN5031_c0_g1	1.02867	1	0.00449129	1	tr|A0A446YCC5|A0A446YCC5_TRITD	*-*	Formyl_trans_N domain-containing protein	IPR002376 (Formyl transferase, N-terminal)	NA	0.969953	0.96477	Turquoise
TRINITY_DN5029_c0_g1	1.14901	1	0.478399	1	tr|A0A1D6N4Q3|A0A1D6N4Q3_MAIZE	*-*	Ribonuclease 2	IPR001568 (Ribonuclease T2-like)	GO:0003723, GO:0016020, GO:0016021, GO:0033897, GO:0090502	0.834285	0.842431	Turquoise
TRINITY_DN5023_c0_g2	10.9495	1.49e-06	2.20623	1	tr|A0A446INS4|A0A446INS4_TRITD	*-*	PHD domain-containing protein	NA	NA	0.819172	0.819096	Turquoise
TRINITY_DN5021_c2_g1	1.49625	0.4579	0.680098	1	NA	NA	Unknown protein	NA	NA	0.844143	0.850183	Turquoise
TRINITY_DN50198_c0_g2	5.2812	0.00570916	1.66624	1	tr|A0A2N9ICL1|A0A2N9ICL1_FAGSY	*-*	CCHC-type domain-containing protein	NA	GO:0003676, GO:0008270	0.806958	0.825291	Turquoise
TRINITY_DN50194_c3_g1	2.15477	1	-1.27535	1	NA	NA	NA	NA	NA	0.872692	0.855311	Turquoise
TRINITY_DN5_c3_g1	0.414664	1	-0.115386	1	tr|A0A072VRS6|A0A072VRS6_MEDTR	***	D-glycerate dehydrogenase/hydroxypyruvate reductase	IPR006139 (D-isomer specific 2-hydroxyacid dehydrogenase, catalytic domain), IPR016040 (NAD(P)-binding domain)	GO:0016491, GO:0016616, GO:0051287, GO:0055114	0.865103	0.854732	Turquoise
TRINITY_DN4995_c0_g1	1.32134	0.172664	0.737066	1	tr|I1H2C9|I1H2C9_BRADI	***	F-box domain-containing protein	IPR001810 (F-box domain)	NA	0.87959	0.889243	Turquoise
TRINITY_DN49941_c0_g1	3.13325	0.244267	-0.721957	1	NA	NA	Unknown protein	NA	NA	0.930389	0.937441	Turquoise
TRINITY_DN49934_c0_g1	5.89929	0.00336155	0	1	NA	NA	NA	NA	NA	0.860334	0.878715	Turquoise
TRINITY_DN49907_c0_g2	1.47871	1	-0.705886	1	NA	NA	NA	NA	NA	0.828267	0.841493	Turquoise
TRINITY_DN49900_c0_g1	2.77811	0.39199	-1.60627	1	NA	NA	NA	NA	NA	0.862216	0.844813	Turquoise
TRINITY_DN49878_c0_g1	4.16222	0.0146839	0.866928	1	NA	NA	Unknown protein	NA	NA	0.931577	0.935904	Turquoise
TRINITY_DN49857_c0_g1	2.5855	0.711228	-0.595727	1	NA	NA	NA	NA	NA	0.872518	0.857738	Turquoise
TRINITY_DN49809_c0_g2	7.1959	7.68e-05	0	1	NA	NA	NA	NA	NA	0.833027	0.818397	Turquoise
TRINITY_DN49793_c0_g1	3.1352	0.315759	-0.70582	1	NA	NA	NA	NA	NA	0.814215	0.8078	Turquoise
TRINITY_DN49713_c1_g1	2.32371	0.233559	1.20506	1	NA	NA	NA	NA	NA	0.82113	0.823398	Turquoise
TRINITY_DN497_c0_g1	1.36849	1	0.141261	1	tr|I1IVH3|I1IVH3_BRADI	***	Ethylene receptor	IPR005467 (Histidine kinase domain), IPR011006 (CheY-like superfamily), IPR014525 (Ethylene receptor), IPR029016 (GAF domain-like)	GO:0000155, GO:0000160, GO:0000166, GO:0004672, GO:0004674, GO:0005524, GO:0005783, GO:0005789, GO:0006355, GO:0006468, GO:0007165, GO:0009723, GO:0009873, GO:0016020, GO:0016021, GO:0016301, GO:0016310, GO:0016740, GO:0023014, GO:0038199, GO:0046872, GO:0051740, GO:2000904	0.814601	0.811239	Turquoise
TRINITY_DN49690_c0_g1	3.72761	0.0661685	-1.3204	1	NA	NA	NA	NA	NA	0.808546	0.817146	Turquoise
TRINITY_DN49643_c0_g1	-7.81863	2.24e-09	-0.44415	1	tr|A0A3B5Z0M4|A0A3B5Z0M4_WHEAT	***	F-box domain-containing protein	IPR001810 (F-box domain), IPR017451 (F-box associated interaction domain)	NA	-0.853514	-0.855905	Turquoise
TRINITY_DN49625_c0_g1	5.42464	0.000142813	0.390437	1	NA	NA	Unknown protein	NA	NA	0.976118	0.982795	Turquoise
TRINITY_DN49579_c0_g1	2.57	0.176693	0.457018	1	NA	NA	NA	NA	NA	0.822656	0.828631	Turquoise
TRINITY_DN495_c1_g1	3.38269	0.120831	2.16458	1	NA	NA	Unknown protein	NA	NA	0.873335	0.892084	Turquoise
TRINITY_DN49492_c1_g1	0.538832	1	-0.133235	1	tr|A0A1D6KW46|A0A1D6KW46_MAIZE	***	Pentatricopeptide repeat-containing protein	IPR002885 (Pentatricopeptide repeat), IPR011990 (Tetratricopeptide-like helical domain)	GO:0005739	0.81278	0.807002	Turquoise
TRINITY_DN49429_c0_g1	4.62795	0.0270719	-2.06012	1	NA	NA	NA	NA	NA	0.824228	0.840466	Turquoise
TRINITY_DN49421_c0_g2	2.01734	0.938452	0.0704226	1	NA	NA	NA	NA	NA	0.810507	0.806727	Turquoise
TRINITY_DN49381_c0_g1	4.93107	0.00157829	-0.39674	1	NA	NA	NA	NA	NA	0.882951	0.88116	Turquoise
TRINITY_DN49326_c0_g2	2.08785	0.682704	-0.0230665	1	NA	NA	NA	NA	NA	0.837747	0.841111	Turquoise
TRINITY_DN49223_c0_g1	6.01893	0.0113912	2.1419	1	NA	NA	NA	NA	NA	0.830587	0.830433	Turquoise
TRINITY_DN49048_c0_g2	-9.37663	1.27e-15	-0.0386915	1	tr|A0A453H851|A0A453H851_AEGTS	***	DUF1618 domain-containing protein	IPR011676 (Domain of unknown function DUF1618)	NA	-0.930668	-0.924967	Turquoise
TRINITY_DN490_c0_g2	1.92965	0.93436	-1.13821	1	NA	NA	Unknown protein	NA	NA	0.896269	0.906009	Turquoise
TRINITY_DN48979_c0_g1	6.62064	0.00502613	3.77739	0.93617	tr|A0A0Q3KH69|A0A0Q3KH69_BRADI	*-*	DUF4283 domain-containing protein	IPR001878 (Zinc finger, CCHC-type)	NA	0.868292	0.891311	Turquoise
TRINITY_DN48937_c0_g1	2.8179	0.531937	-0.639072	1	NA	NA	NA	NA	NA	0.897022	0.897756	Turquoise
TRINITY_DN489_c0_g1	2.4405	0.597663	1.39347	1	NA	NA	Unknown protein	NA	NA	0.865327	0.878206	Turquoise
TRINITY_DN48895_c0_g1	6.07614	9.92e-05	3.67052	0.399716	NA	NA	NA	NA	NA	0.903425	0.895158	Turquoise
TRINITY_DN4888_c0_g1	1.02879	1	-0.885502	1	tr|A0A3B6B7A5|A0A3B6B7A5_WHEAT	*-*	Amino_oxidase domain-containing protein	IPR029063 (S-adenosyl-L-methionine-dependent methyltransferase)	NA	0.867933	0.863537	Turquoise
TRINITY_DN48849_c0_g1	1.70031	0.235295	-0.326157	1	sp|P12333|CB2A_SPIOL	*-*	Chlorophyll a-b binding protein, chloroplastic	IPR022796 (Chlorophyll A-B binding protein), IPR023329 (Chlorophyll a/b binding protein domain)	GO:0009507, GO:0009522, GO:0009523, GO:0009535, GO:0009536, GO:0009579, GO:0009765, GO:0015979, GO:0016020, GO:0016021, GO:0016168, GO:0018298, GO:0046872	0.913951	0.922778	Turquoise
TRINITY_DN48835_c0_g1	2.46286	0.726547	-0.528337	1	NA	NA	NA	NA	NA	0.836699	0.838348	Turquoise
TRINITY_DN488_c0_g2	1.12908	1	0.370804	1	NA	NA	Unknown protein	IPR009027 (Ribosomal protein L9/RNase H1, N-terminal)	NA	0.899337	0.898519	Turquoise
TRINITY_DN48686_c0_g2	0.851263	1	-0.0727084	1	NA	NA	NA	NA	NA	0.85624	0.854274	Turquoise
TRINITY_DN48664_c0_g1	1.88641	1	-1.24219	1	NA	NA	NA	NA	NA	0.798123	0.813446	Turquoise
TRINITY_DN4866_c0_g1	0.306857	1	-0.0395481	1	tr|W5EJX2|W5EJX2_WHEAT	***	Josephin domain-containing protein	IPR006155 (Josephin domain)	GO:0004843, GO:0016579, GO:0016787	0.878928	0.877142	Turquoise
TRINITY_DN48630_c0_g2	1.55094	1	-0.512326	1	NA	NA	NA	NA	NA	0.86264	0.86774	Turquoise
TRINITY_DN48625_c1_g1	2.08862	0.338025	0.406512	1	NA	NA	NA	NA	NA	0.877276	0.868746	Turquoise
TRINITY_DN48611_c0_g1	3.92502	0.0386513	-2.14115	1	NA	NA	Unknown protein	NA	NA	0.948057	0.940228	Turquoise
TRINITY_DN48530_c0_g1	3.03586	0.157363	-2.36372	1	NA	NA	NA	NA	NA	0.895853	0.896408	Turquoise
TRINITY_DN4843_c0_g1	-0.31677	1	0.0460923	1	tr|A0A2P2K9P5|A0A2P2K9P5_RHIMU	***	Vesicle-associated membrane protein	IPR001388 (Synaptobrevin), IPR011012 (Longin-like domain)	GO:0016020, GO:0016021, GO:0016192	-0.826041	-0.821146	Turquoise
TRINITY_DN48209_c0_g1	4.01412	0.0307552	-0.661684	1	NA	NA	NA	NA	NA	0.912338	0.891233	Turquoise
TRINITY_DN48182_c0_g1	1.02394	1	-0.429962	1	NA	NA	NA	NA	NA	0.849555	0.839868	Turquoise
TRINITY_DN48180_c0_g1	-10.0455	2.19e-57	-0.101622	1	NA	NA	NA	NA	NA	-0.942001	-0.9412	Turquoise
TRINITY_DN48013_c0_g2	5.62607	1.67e-05	1.17109	1	NA	NA	Unknown protein	NA	NA	0.876353	0.889505	Turquoise
TRINITY_DN48_c0_g3	1.06416	1	-0.0860922	1	tr|A0A2K2D0G6|A0A2K2D0G6_BRADI	***	Protein kinase domain-containing protein	IPR011009 (Protein kinase-like domain), IPR013320 (Concanavalin A-like lectin/glucanase domain)	GO:0004672, GO:0005524, GO:0006468, GO:0016020, GO:0016021	0.856387	0.849621	Turquoise
TRINITY_DN47994_c0_g1	7.34374	0.000160584	2.94507	1	tr|A0A3B6N1G6|A0A3B6N1G6_WHEAT	*-*	NB-ARC domain-containing protein	IPR002182 (NB-ARC), IPR027417 (P-loop containing nucleoside triphosphate hydrolase)	NA	0.811824	0.840349	Turquoise
TRINITY_DN47980_c0_g1	5.72598	0.00842668	2.61902	1	tr|A0A0Q3EHL2|A0A0Q3EHL2_BRADI	***	RNase H domain-containing protein	NA	GO:0003676, GO:0004523, GO:0090502	0.799601	0.801012	Turquoise
TRINITY_DN47881_c0_g1	2.04136	0.405698	-0.213434	1	NA	NA	NA	NA	NA	0.902661	0.874427	Turquoise
TRINITY_DN47848_c0_g1	5.94717	0.000956557	1.29819	1	NA	NA	Unknown protein	NA	NA	0.873031	0.875064	Turquoise
TRINITY_DN47804_c0_g1	5.90034	7.77e-05	2.40795	1	tr|A0A1R3Q1V2|A0A1R3Q1V2_MAIZE	*-*	BED-type domain-containing protein	IPR012337 (Ribonuclease H-like domain)	GO:0003677, GO:0046983	0.962275	0.95649	Turquoise
TRINITY_DN478_c0_g1	-2.62093	3.13e-05	0.0579373	1	NA	NA	Unknown protein	NA	NA	-0.873067	-0.865581	Turquoise
TRINITY_DN47752_c0_g1	6.01509	1.06e-07	1.15048	1	NA	NA	Unknown protein	NA	NA	0.895004	0.890025	Turquoise
TRINITY_DN47723_c0_g1	1.75475	1	-3.12514	0.540438	tr|I1GW12|I1GW12_BRADI	*-*	AAA domain-containing protein	NA	GO:0000166, GO:0004176, GO:0004222, GO:0005524, GO:0006508, GO:0009535, GO:0009941, GO:0010027, GO:0010205, GO:0010206, GO:0010304, GO:0016020, GO:0016021	0.877037	0.87192	Turquoise
TRINITY_DN47654_c0_g1	7.1175	1.14e-05	3.93328	0.380267	NA	NA	NA	NA	NA	0.802553	0.829711	Turquoise
TRINITY_DN4762_c5_g1	1.46003	1	-0.291399	1	NA	NA	NA	NA	NA	0.884357	0.876866	Turquoise
TRINITY_DN47533_c0_g5	6.18492	0.00132309	0	1	NA	NA	NA	NA	NA	0.830338	0.830056	Turquoise
TRINITY_DN47530_c0_g1	4.27732	0.00496534	-0.837617	1	NA	NA	NA	NA	NA	0.984224	0.981038	Turquoise
TRINITY_DN475_c0_g2	3.64864	NA	1.30589	NA	NA	NA	Unknown protein	NA	NA	0.907511	0.919888	Turquoise
TRINITY_DN4746_c0_g2	1.7311	1	0.114049	1	NA	NA	NA	NA	NA	0.81924	0.826839	Turquoise
TRINITY_DN47406_c0_g1	3.03124	0.00494469	-0.739455	1	NA	NA	NA	NA	NA	0.84748	0.829728	Turquoise
TRINITY_DN4740_c0_g4	8.83359	2e-11	0	1	NA	NA	NA	NA	NA	0.895536	0.916487	Turquoise
TRINITY_DN47386_c0_g1	-5.16394	1.32e-76	0.030241	1	tr|I1IX63|I1IX63_BRADI	***	Amidohydro-rel domain-containing protein	IPR032466 (Metal-dependent hydrolase)	GO:0009507, GO:0016787, GO:0016831	-0.951559	-0.951762	Turquoise
TRINITY_DN47312_c0_g1	0.734122	1	-0.00760965	1	NA	NA	NA	NA	NA	0.818178	0.808951	Turquoise
TRINITY_DN4711_c1_g1	0.872444	1	0.100543	1	tr|A0A3B6FTL8|A0A3B6FTL8_WHEAT	***	BURP domain-containing protein	IPR004873 (BURP domain)	NA	0.808017	0.809934	Turquoise
TRINITY_DN47057_c0_g1	1.25988	1	-0.108482	1	tr|A0A3B6CDX9|A0A3B6CDX9_WHEAT	***	F-box domain-containing protein	IPR001810 (F-box domain)	NA	0.802365	0.81103	Turquoise
TRINITY_DN46946_c1_g1	3.00485	NA	-3.72501	NA	NA	NA	NA	NA	NA	0.920324	0.926132	Turquoise
TRINITY_DN46894_c0_g1	5.90863	0.00831202	2.33383	1	NA	NA	NA	NA	NA	0.814821	0.80852	Turquoise
TRINITY_DN46807_c0_g1	8.60658	1.2e-09	0	1	NA	NA	NA	NA	NA	0.871203	0.878248	Turquoise
TRINITY_DN46786_c0_g2	3.78837	0.0788374	-2.90002	1	NA	NA	NA	NA	NA	0.896686	0.900014	Turquoise
TRINITY_DN46754_c0_g1	2.53857	0.0374301	-0.176611	1	NA	NA	NA	NA	NA	0.938586	0.937995	Turquoise
TRINITY_DN46748_c0_g2	2.22776	0.275799	-0.363966	1	tr|A0A0E0QY36|A0A0E0QY36_ORYRU	***	Protein kinase domain-containing protein	IPR001611 (Leucine-rich repeat), IPR003591 (Leucine-rich repeat, typical subtype), IPR011009 (Protein kinase-like domain), IPR013320 (Concanavalin A-like lectin/glucanase domain), IPR032675 (Leucine-rich repeat domain, L domain-like)	GO:0000166, GO:0004672, GO:0004674, GO:0005524, GO:0006468, GO:0016020, GO:0016021, GO:0016301, GO:0016310, GO:0016740	0.786747	0.803426	Turquoise
TRINITY_DN46747_c0_g1	8.35062	8.77e-11	0	1	tr|A0A059DIQ2|A0A059DIQ2_EUCGR	*-*	CitMHS domain-containing protein	NA	GO:0016020, GO:0016021, GO:0055085	0.968037	0.961702	Turquoise
TRINITY_DN46677_c0_g1	6.52678	9.27e-05	0	1	NA	NA	NA	NA	NA	0.919364	0.919702	Turquoise
TRINITY_DN46554_c0_g1	4.79057	0.0146065	-1.38822	1	NA	NA	NA	NA	NA	0.935111	0.940035	Turquoise
TRINITY_DN4652_c4_g1	5.16836	0.0086933	2.16614	1	NA	NA	NA	NA	NA	0.883226	0.883106	Turquoise
TRINITY_DN4652_c0_g1	0.722942	1	0.125298	1	tr|C0PF34|C0PF34_MAIZE	*-*	Heme-binding-like protein chloroplastic	IPR006917 (SOUL haem-binding protein)	GO:0009535, GO:0010287, GO:0020037	0.858259	0.868462	Turquoise
TRINITY_DN4649_c0_g2	5.46767	0.000202109	-2.12299	1	NA	NA	NA	NA	NA	0.819895	0.818411	Turquoise
TRINITY_DN4647_c3_g1	2.46091	0.0938423	-2.87427	0.125924	NA	NA	Unknown protein	NA	NA	0.966085	0.963148	Turquoise
TRINITY_DN46376_c0_g1	1.60737	0.653409	0.489574	1	NA	NA	NA	NA	NA	0.84116	0.831232	Turquoise
TRINITY_DN46312_c0_g1	3.22254	0.00226858	1.00705	1	tr|A0A2R6RHQ6|A0A2R6RHQ6_ACTCC	*-*	Serine/threonine-protein kinase	IPR002912 (ACT domain)	GO:0004672, GO:0005524, GO:0006468, GO:0016301, GO:0016310	0.954464	0.96267	Turquoise
TRINITY_DN46281_c0_g1	3.42364	0.00996248	1.41355	1	NA	NA	Unknown protein	NA	NA	0.893922	0.905329	Turquoise
TRINITY_DN46231_c0_g3	3.08995	0.00120975	1.46822	1	tr|A0A4D9BE37|A0A4D9BE37_SALSN	*-*	Ribulose-phosphate 3-epimerase	NA	NA	0.885863	0.891206	Turquoise
TRINITY_DN46221_c1_g1	2.38321	0.364168	0.353281	1	NA	NA	NA	NA	NA	0.838932	0.836581	Turquoise
TRINITY_DN46163_c0_g1	-2.63003	0.0376488	-0.320462	1	tr|A0A446MP42|A0A446MP42_TRITD	***	RBR-type E3 ubiquitin transferase	IPR002867 (IBR domain), IPR013083 (Zinc finger, RING/FYVE/PHD-type), IPR016135 (Ubiquitin-conjugating enzyme/RWD-like), IPR031127 (E3 ubiquitin ligase RBR family)	NA	-0.822977	-0.815755	Turquoise
TRINITY_DN45962_c0_g1	3.7137	0.0126008	0.516972	1	NA	NA	NA	NA	NA	0.940235	0.930292	Turquoise
TRINITY_DN4589_c3_g1	7.93211	3.84e-07	5.97091	0.00308898	NA	NA	NA	NA	NA	0.895005	0.901036	Turquoise
TRINITY_DN45758_c0_g1	1.96763	1	0.00577629	1	tr|A0A446PDN4|A0A446PDN4_TRITD	*-*	Protein kinase domain-containing protein	IPR004082 (Protein OBERON), IPR011009 (Protein kinase-like domain), IPR013320 (Concanavalin A-like lectin/glucanase domain), IPR032881 (Oberon, PHD finger domain)	NA	0.792233	0.807543	Turquoise
TRINITY_DN4570_c2_g2	3.32469	4.79e-08	1.43797	1	tr|A0A3B6N3W9|A0A3B6N3W9_WHEAT	***	Protein kinase domain-containing protein	IPR024788 (Malectin-like carbohydrate-binding domain), IPR032675 (Leucine-rich repeat domain, L domain-like)	NA	0.855139	0.844943	Turquoise
TRINITY_DN4570_c2_g1	3.68901	1.26e-07	1.74587	1	tr|M0UXT3|M0UXT3_HORVV	*-*	Protein kinase domain-containing protein	IPR011009 (Protein kinase-like domain), IPR013320 (Concanavalin A-like lectin/glucanase domain)	GO:0004672, GO:0005524, GO:0006468	0.888548	0.883055	Turquoise
TRINITY_DN457_c1_g2	5.63489	0.0314728	1.98217	1	NA	NA	Unknown protein	NA	NA	0.962163	0.971338	Turquoise
TRINITY_DN45663_c1_g1	4.86666	0.00136514	2.62005	1	NA	NA	NA	NA	NA	0.864223	0.869899	Turquoise
TRINITY_DN4563_c0_g1	5.49074	0.276238	1.10819	1	NA	NA	NA	NA	NA	0.942299	0.951353	Turquoise
TRINITY_DN455_c0_g1	-0.851072	1	0.0364382	1	tr|A0A453DDS3|A0A453DDS3_AEGTS	***	RNase H domain-containing protein	IPR001938 (Thaumatin)	NA	-0.860217	-0.871316	Turquoise
TRINITY_DN4548_c0_g2	1.75234	0.532609	-6.47138	1.35e-09	NA	NA	Unknown protein	NA	NA	0.875402	0.888878	Turquoise
TRINITY_DN45352_c0_g1	3.58753	0.035672	0.032383	1	tr|A0A3B6G1X1|A0A3B6G1X1_WHEAT	***	Rx_N domain-containing protein	NA	NA	0.921687	0.914316	Turquoise
TRINITY_DN45351_c0_g1	1.37509	1	-2.79965	0.347978	NA	NA	NA	NA	NA	0.816465	0.8126	Turquoise
TRINITY_DN4531_c0_g3	2.40093	0.471337	1.28848	1	NA	NA	NA	NA	NA	0.794076	0.808789	Turquoise
TRINITY_DN45184_c0_g1	2.05946	0.169645	0.410995	1	tr|A0A0B0PDR7|A0A0B0PDR7_GOSAR	*-*	TIP41-like protein	NA	NA	0.876499	0.893078	Turquoise
TRINITY_DN45146_c1_g1	5.83089	0.0309622	0	1	NA	NA	NA	NA	NA	0.822632	0.822762	Turquoise
TRINITY_DN45123_c5_g1	2.85757	0.309748	-0.219511	1	NA	NA	NA	NA	NA	0.81269	0.813537	Turquoise
TRINITY_DN45062_c1_g4	4.00207	0.029341	1.83557	1	NA	NA	NA	NA	NA	0.898862	0.892419	Turquoise
TRINITY_DN45011_c0_g1	6.7655	0.00233013	3.56633	1	NA	NA	NA	NA	NA	0.894172	0.881994	Turquoise
TRINITY_DN4500_c0_g1	1.33514	0.977163	-0.397384	1	NA	NA	Unknown protein	NA	NA	0.925684	0.920607	Turquoise
TRINITY_DN44944_c0_g1	2.72609	0.135935	-1.04219	1	tr|A0A1E5V4H1|A0A1E5V4H1_9POAL	*-*	Cullin-associated NEDD8-dissociated protein 1	IPR016024 (Armadillo-type fold)	GO:0010265	0.89346	0.899929	Turquoise
TRINITY_DN44901_c0_g1	2.3082	0.0128592	0.0968859	1	NA	NA	NA	NA	NA	0.943575	0.954332	Turquoise
TRINITY_DN4481_c0_g1	3.78587	0.00259765	2.62117	0.462209	NA	NA	NA	NA	NA	0.851746	0.868195	Turquoise
TRINITY_DN4479_c1_g2	7.39396	0.000254425	3.87832	0.72284	NA	NA	Unknown protein	NA	NA	0.795761	0.803289	Turquoise
TRINITY_DN44781_c0_g1	4.49102	0.0178269	2.37018	1	NA	NA	Unknown protein	NA	NA	0.797475	0.802154	Turquoise
TRINITY_DN44775_c0_g1	2.31068	0.48087	-1.91747	1	tr|A0A2I0V9V8|A0A2I0V9V8_9ASPA	***	Retrovirus-related Pol polyprotein from transposon TNT 1-94	IPR001878 (Zinc finger, CCHC-type), IPR025724 (GAG-pre-integrase domain)	GO:0000943, GO:0003676	0.81626	0.808056	Turquoise
TRINITY_DN44725_c0_g1	4.81898	0.0121598	-2.1131	1	tr|A0A1W6AK75|A0A1W6AK75_ARATH	***	Transferring glycosyl group transferase	NA	GO:0016740	0.906987	0.888209	Turquoise
TRINITY_DN44707_c0_g2	-6.53214	1.01e-05	-0.237846	1	NA	NA	NA	NA	NA	-0.822681	-0.819709	Turquoise
TRINITY_DN4469_c1_g3	2.3581	NA	-1.33891	NA	tr|A0A446LJF8|A0A446LJF8_TRITD	*-*	Skp1 domain-containing protein	NA	NA	0.844287	0.842464	Turquoise
TRINITY_DN4469_c1_g1	3.09371	0.12831	1.58912	1	tr|A0A3B6LPP7|A0A3B6LPP7_WHEAT	*-*	Skp1 domain-containing protein	NA	NA	0.830388	0.836169	Turquoise
TRINITY_DN44610_c2_g1	2.57664	0.288144	-0.119103	1	tr|A2XTE7|A2XTE7_ORYSI	*-*	SWIM-type domain-containing protein	IPR004330 (FAR1 DNA binding domain)	GO:0006355, GO:0008270	0.878978	0.857304	Turquoise
TRINITY_DN44606_c0_g1	2.29911	0.429286	-2.75828	0.681143	NA	NA	NA	NA	NA	0.946986	0.939925	Turquoise
TRINITY_DN446_c3_g1	2.34695	0.348406	0.681105	1	NA	NA	NA	NA	NA	0.873395	0.869978	Turquoise
TRINITY_DN44574_c0_g1	6.07043	0.000302885	3.30098	0.780146	AT5G63950.1	*-*	chromatin remodeling 24	NA	NA	0.839756	0.858786	Turquoise
TRINITY_DN4443_c1_g3	3.19678	0.17821	1.28633	1	NA	NA	NA	NA	NA	0.841295	0.83346	Turquoise
TRINITY_DN4439_c0_g3	2.16438	1	-3.84108	0.642828	NA	NA	Unknown protein	NA	NA	0.838963	0.84049	Turquoise
TRINITY_DN4436_c0_g1	-1.48216	0.160794	-0.321825	1	tr|A0A1D5UW38|A0A1D5UW38_WHEAT	***	Nudix hydrolase domain-containing protein	IPR011876 (Isopentenyl-diphosphate delta-isomerase, type 1), IPR015797 (NUDIX hydrolase domain-like)	GO:0004452, GO:0008299, GO:0016787	-0.804562	-0.815047	Turquoise
TRINITY_DN44325_c0_g1	-2.79528	0.000194221	0.902345	1	NA	NA	Unknown protein	NA	NA	-0.840075	-0.821557	Turquoise
TRINITY_DN44249_c0_g1	5.2351	0.000786777	3.85666	0.154464	NA	NA	NA	NA	NA	0.795285	0.81304	Turquoise
TRINITY_DN44193_c0_g1	-7.59262	1.73e-27	-0.664018	1	tr|B1PHV2|B1PHV2_SORBI	*-*	Fatty acid desaturase	IPR021863 (Fatty acid desaturase, N-terminal)	GO:0006629, GO:0016020, GO:0016021, GO:0016717, GO:0055114	-0.841547	-0.85769	Turquoise
TRINITY_DN44113_c0_g1	-2.75063	0.947549	0.062543	1	NA	NA	NA	NA	NA	-0.873473	-0.863777	Turquoise
TRINITY_DN4409_c0_g1	-0.757635	1	-0.237635	1	tr|A0A0D9VY14|A0A0D9VY14_9ORYZ	*-*	Peptidylprolyl isomerase	IPR016184 (Capsid/spike protein, ssDNA virus), IPR023566 (Peptidyl-prolyl cis-trans isomerase, FKBP-type)	GO:0000413, GO:0003755, GO:0016853	-0.814979	-0.819538	Turquoise
TRINITY_DN44078_c0_g1	1.68741	0.985795	-0.565238	1	NA	NA	NA	NA	NA	0.815582	0.819988	Turquoise
TRINITY_DN44015_c0_g2	6.15814	0.00893243	2.98717	1	NA	NA	NA	NA	NA	0.832367	0.814562	Turquoise
TRINITY_DN43939_c0_g1	6.01562	0.00133702	0	1	NA	NA	NA	NA	NA	0.900367	0.903047	Turquoise
TRINITY_DN4393_c1_g1	3.8174	2.11e-06	0.850442	1	tr|A0A2X0SDP0|A0A2X0SDP0_WHEAT	***	CCHC-type domain-containing protein	NA	GO:0003676, GO:0008270	0.874232	0.889278	Turquoise
TRINITY_DN4368_c0_g1	1.13656	1	0.427352	1	NA	NA	Unknown protein	NA	NA	0.853178	0.861736	Turquoise
TRINITY_DN43675_c0_g2	6.25226	0.000881544	0	1	NA	NA	NA	NA	NA	0.853304	0.839885	Turquoise
TRINITY_DN43675_c0_g1	2.34153	0.502163	-0.812829	1	NA	NA	NA	NA	NA	0.920384	0.918017	Turquoise
TRINITY_DN4360_c1_g1	2.54115	0.0193605	0.549312	1	NA	NA	NA	NA	NA	0.919632	0.928129	Turquoise
TRINITY_DN4360_c0_g1	1.20582	0.828374	0.475569	1	tr|B6TCZ2|B6TCZ2_MAIZE	***	Protein ABIL1	IPR028457 (ABI family)	NA	0.863782	0.893474	Turquoise
TRINITY_DN43434_c0_g1	4.1313	0.00531821	1.06904	1	NA	NA	NA	NA	NA	0.853011	0.847656	Turquoise
TRINITY_DN4342_c0_g1	0.424995	1	-0.151093	1	tr|A0A3B6C883|A0A3B6C883_WHEAT	***	PDZ domain-containing protein	IPR001940 (Peptidase S1C), IPR009003 (Peptidase S1, PA clan)	NA	0.847841	0.83841	Turquoise
TRINITY_DN4333_c0_g1	0.48459	1	0.0398114	1	tr|A0A287PA10|A0A287PA10_HORVV	***	RING-type domain-containing protein	IPR010543 (Domain of unknown function DUF1117), IPR013083 (Zinc finger, RING/FYVE/PHD-type)	GO:0016567, GO:0061630	0.865536	0.881785	Turquoise
TRINITY_DN4323_c0_g1	-0.515315	1	0.0792032	1	NA	NA	Unknown protein	NA	NA	-0.83678	-0.813799	Turquoise
TRINITY_DN43187_c0_g2	1.45711	1	-2.74011	0.67492	NA	NA	NA	NA	NA	0.85149	0.845565	Turquoise
TRINITY_DN43177_c0_g1	1.94695	0.488557	0.313281	1	NA	NA	NA	NA	NA	0.795291	0.823739	Turquoise
TRINITY_DN4317_c1_g1	0.799253	1	-0.131953	1	tr|N1R2G0|N1R2G0_AEGTA	***	Annexin D4	IPR018502 (Annexin repeat)	GO:0005509, GO:0005544	0.876502	0.864134	Turquoise
TRINITY_DN4317_c0_g1	1.84138	0.370648	-0.0922922	1	NA	NA	Unknown protein	NA	NA	0.914388	0.911088	Turquoise
TRINITY_DN4316_c0_g1	0.500989	1	0.0740001	1	tr|F2D844|F2D844_HORVV	***	Amidophosphoribosyltransferase	IPR005854 (Amidophosphoribosyltransferase), IPR029055 (Nucleophile aminohydrolases, N-terminal), IPR029057 (Phosphoribosyltransferase-like)	GO:0004044, GO:0006164, GO:0006189, GO:0009113, GO:0009116, GO:0016740, GO:0016757, GO:0046872, GO:0051536	0.83193	0.830306	Turquoise
TRINITY_DN43082_c0_g1	7.79899	2.14e-07	2.7264	1	NA	NA	NA	NA	NA	0.947217	0.951185	Turquoise
TRINITY_DN43026_c0_g1	4.60196	0.0105971	2.63082	1	NA	NA	NA	NA	NA	0.838179	0.835899	Turquoise
TRINITY_DN43017_c0_g2	7.2137	8.73e-07	0	1	NA	NA	NA	NA	NA	0.938818	0.939812	Turquoise
TRINITY_DN42972_c0_g2	5.12842	0.00600531	2.68786	1	NA	NA	NA	NA	NA	0.848825	0.835334	Turquoise
TRINITY_DN4297_c0_g1	3.47676	0.0877273	0.75682	1	NA	NA	Unknown protein	NA	NA	0.968929	0.966088	Turquoise
TRINITY_DN42906_c0_g1	2.96728	0.109539	0.602932	1	NA	NA	NA	NA	NA	0.895341	0.883579	Turquoise
TRINITY_DN4288_c0_g1	0.888649	1	0.171421	1	tr|A0A1E5W8P5|A0A1E5W8P5_9POAL	*-*	CTP_transf_like domain-containing protein	IPR014729 (Rossmann-like alpha/beta/alpha sandwich fold)	GO:0003824, GO:0009058	0.882329	0.871593	Turquoise
TRINITY_DN42876_c0_g1	0.905323	1	-0.889304	1	NA	NA	Unknown protein	NA	NA	0.818547	0.827011	Turquoise
TRINITY_DN42858_c0_g1	2.16576	0.528979	0.66513	1	NA	NA	NA	NA	NA	0.836404	0.828875	Turquoise
TRINITY_DN42729_c0_g1	2.91898	0.175113	-1.8662	1	NA	NA	NA	NA	NA	0.95394	0.954023	Turquoise
TRINITY_DN42722_c0_g1	6.78946	9.16e-06	0	1	NA	NA	NA	NA	NA	0.962262	0.964994	Turquoise
TRINITY_DN42719_c0_g3	1.56251	1	-0.413567	1	tr|A0A2Z4GT92|A0A2Z4GT92_9ORYZ	***	Fertility-related ORF1 protein	NA	NA	0.862855	0.83618	Turquoise
TRINITY_DN4270_c0_g1	1.02782	1	-0.302082	1	tr|R7VZ34|R7VZ34_AEGTA	*-*	RNA-binding protein 25	IPR002483 (PWI domain)	GO:0003676, GO:0003723, GO:0006397	0.879828	0.880811	Turquoise
TRINITY_DN42696_c1_g3	2.43669	0.485659	0.171549	1	NA	NA	NA	NA	NA	0.884781	0.878748	Turquoise
TRINITY_DN42678_c0_g1	2.14626	1	-2.4505	1	NA	NA	Unknown protein	NA	NA	0.811678	0.808842	Turquoise
TRINITY_DN42605_c0_g1	1.27817	1	-1.85127	0.67966	NA	NA	NA	NA	NA	0.920347	0.909689	Turquoise
TRINITY_DN4257_c1_g1	7.83173	8.17e-09	-1.17112	1	NA	NA	NA	NA	NA	0.912145	0.911118	Turquoise
TRINITY_DN42562_c2_g1	4.35108	0.0180252	-2.74251	1	NA	NA	Unknown protein	NA	NA	0.951812	0.953988	Turquoise
TRINITY_DN4255_c0_g1	1.4354	0.735443	-0.369261	1	NA	NA	NA	NA	NA	0.941498	0.935134	Turquoise
TRINITY_DN4254_c0_g1	-2.76125	4.81e-14	-0.683473	1	tr|A0A0Q3EHC5|A0A0Q3EHC5_BRADI	*-*	Mur_ligase_M domain-containing protein	IPR001645 (Folylpolyglutamate synthetase)	GO:0004326, GO:0005524, GO:0005759, GO:0006761, GO:0008841, GO:0009058, GO:0009396, GO:0009793, GO:0016874, GO:0046901	-0.841065	-0.845091	Turquoise
TRINITY_DN4248_c0_g1	0.921021	1	0.548903	1	tr|A0A446L439|A0A446L439_TRITD	***	DUF1279 domain-containing protein	NA	NA	0.773208	0.801433	Turquoise
TRINITY_DN42390_c0_g2	7.03899	4.75e-06	0	1	NA	NA	NA	NA	NA	0.912986	0.93122	Turquoise
TRINITY_DN42344_c0_g1	3.04762	0.129045	-2.217	1	tr|A0A1Q3B7W6|A0A1Q3B7W6_CEPFO	***	DUF761 domain-containing protein	IPR008480 (Protein of unknown function DUF761, plant)	NA	0.899047	0.899482	Turquoise
TRINITY_DN4234_c0_g1	1.91087	0.351008	0.444535	1	tr|A0A0Q3EII2|A0A0Q3EII2_BRADI	***	PALP domain-containing protein	IPR001926 (Tryptophan synthase beta subunit-like PLP-dependent enzyme), IPR027278 (1-aminocyclopropane-1-carboxylate deaminase/D-cysteine desulfhydrase)	GO:0003824	0.898034	0.907527	Turquoise
TRINITY_DN4226_c3_g1	6.94157	5.56e-07	4.83579	0.0163038	NA	NA	NA	NA	NA	0.95332	0.953139	Turquoise
TRINITY_DN4225_c0_g1	0.256062	1	0.085397	1	tr|A0A3B6AR18|A0A3B6AR18_WHEAT	***	HECT domain-containing protein	IPR000569 (HECT domain), IPR016024 (Armadillo-type fold)	NA	0.803647	0.818947	Turquoise
TRINITY_DN42194_c0_g1	3.12321	0.109712	-1.69545	1	NA	NA	NA	NA	NA	0.943139	0.953911	Turquoise
TRINITY_DN42152_c0_g1	3.16856	0.00220586	-1.47803	1	tr|M0XP72|M0XP72_HORVV	***	Protein kinase domain-containing protein	IPR011009 (Protein kinase-like domain), IPR013320 (Concanavalin A-like lectin/glucanase domain)	GO:0004672, GO:0005524, GO:0006468	0.931026	0.92615	Turquoise
TRINITY_DN42125_c0_g1	8.09862	1.66e-06	3.02715	1	NA	NA	Unknown protein	NA	NA	0.892214	0.892677	Turquoise
TRINITY_DN42047_c0_g3	1.52444	1	-0.903095	1	NA	NA	Unknown protein	NA	NA	0.823992	0.810558	Turquoise
TRINITY_DN41908_c0_g1	1.19969	1	0.429047	1	NA	NA	NA	NA	NA	0.837008	0.838836	Turquoise
TRINITY_DN4189_c0_g2	3.01591	0.0428192	0.439213	1	NA	NA	Unknown protein	NA	NA	0.916916	0.905338	Turquoise
TRINITY_DN4186_c0_g4	7.38442	5.7e-06	5.53854	0.013263	NA	NA	NA	NA	NA	0.875156	0.887817	Turquoise
TRINITY_DN41792_c1_g1	4.06443	0.0254744	-2.47162	1	NA	NA	NA	NA	NA	0.900792	0.916586	Turquoise
TRINITY_DN41737_c0_g2	3.29367	0.923924	0.420916	1	NA	NA	NA	NA	NA	0.809424	0.801013	Turquoise
TRINITY_DN41676_c0_g1	3.15887	0.0707415	-4.08018	0.271808	tr|A0A080YUK8|A0A080YUK8_WHEAT	***	Protein kinase domain-containing protein	IPR000742 (EGF-like domain), IPR011009 (Protein kinase-like domain), IPR013320 (Concanavalin A-like lectin/glucanase domain), IPR025287 (Wall-associated receptor kinase, galacturonan-binding domain)	GO:0004672, GO:0005509, GO:0005524, GO:0006468, GO:0016020, GO:0016021, GO:0030247	0.942326	0.927559	Turquoise
TRINITY_DN4167_c2_g1	2.02412	0.15628	0.573195	1	tr|A0A287IV72|A0A287IV72_HORVV	***	dCTP pyrophosphatase 1	IPR025984 (dCTP pyrophosphatase 1)	GO:0009143, GO:0046872, GO:0047429	0.892742	0.886563	Turquoise
TRINITY_DN41666_c0_g1	9.77515	5.33e-13	7.38146	2.08e-06	NA	NA	NA	NA	NA	0.939789	0.952406	Turquoise
TRINITY_DN41643_c0_g1	7.904	4.47e-08	0.568083	1	NA	NA	NA	NA	NA	0.851727	0.848561	Turquoise
TRINITY_DN41565_c0_g1	2.4372	0.740871	-0.428066	1	tr|Q2ACB9|Q2ACB9_MAIZE	*-*	Histidine kinase	IPR003594 (Histidine kinase-like ATPase, C-terminal domain), IPR004358 (Signal transduction histidine kinase-related protein, C-terminal)	GO:0000155, GO:0000160, GO:0007165, GO:0016020, GO:0016021, GO:0016301, GO:0016310, GO:0016772, GO:0023014	0.824172	0.816512	Turquoise
TRINITY_DN41497_c0_g1	8.4292	1.13e-06	6.54149	0.00290387	NA	NA	NA	NA	NA	0.855449	0.844088	Turquoise
TRINITY_DN4149_c0_g3	1.5379	1	-0.218579	1	tr|A0A3B6NK54|A0A3B6NK54_WHEAT	*-*	DDE Tnp4 domain-containing protein	IPR027806 (Harbinger transposase-derived nuclease domain)	NA	0.814821	0.814805	Turquoise
TRINITY_DN41442_c0_g1	2.68135	0.53896	-3.65806	0.726356	NA	NA	NA	NA	NA	0.897368	0.891582	Turquoise
TRINITY_DN41395_c0_g1	2.53063	0.00256962	-1.48244	1	tr|A0A453SK15|A0A453SK15_AEGTS	***	tRNA-synt_1g domain-containing protein	IPR009080 (Aminoacyl-tRNA synthetase, class Ia, anticodon-binding), IPR014729 (Rossmann-like alpha/beta/alpha sandwich fold), IPR014758 (Methionyl-tRNA synthetase), IPR029038 (Methionyl-tRNA synthetase, Zn-domain)	NA	0.923022	0.90752	Turquoise
TRINITY_DN41279_c0_g3	4.77704	0.156002	-1.67344	1	NA	NA	Unknown protein	NA	NA	0.974498	0.973852	Turquoise
TRINITY_DN41236_c0_g1	6.2298	0.0122693	3.3235	1	NA	NA	NA	NA	NA	0.800828	0.800944	Turquoise
TRINITY_DN41235_c0_g1	3.20904	0.276228	-2.74546	1	tr|A0A446YYK0|A0A446YYK0_TRITD	*-*	NB-ARC domain-containing protein	IPR001611 (Leucine-rich repeat), IPR002182 (NB-ARC), IPR032675 (Leucine-rich repeat domain, L domain-like)	NA	0.909723	0.911015	Turquoise
TRINITY_DN41213_c1_g1	7.05907	1.75e-06	5.30926	0.00807836	tr|A0A287WIM8|A0A287WIM8_HORVV	*-*	Reverse transcriptase domain-containing protein	NA	NA	0.857144	0.871257	Turquoise
TRINITY_DN41108_c0_g4	4.54371	0.267754	2.10168	1	tr|A0A287RYP0|A0A287RYP0_HORVV	*-*	C2 NT-type domain-containing protein	IPR033343 (PLASTID MOVEMENT IMPAIRED1)	GO:0005623, GO:0009902	0.91914	0.911355	Turquoise
TRINITY_DN41084_c0_g1	5.64715	0.0015011	-0.643887	1	NA	NA	NA	NA	NA	0.944066	0.943959	Turquoise
TRINITY_DN41022_c0_g2	6.69932	0.000225508	1.17685	1	NA	NA	NA	NA	NA	0.829036	0.813965	Turquoise
TRINITY_DN41011_c0_g1	4.16507	0.125165	-1.64654	1	NA	NA	NA	NA	NA	0.848985	0.830907	Turquoise
TRINITY_DN40987_c0_g1	-4.70931	0.000822804	-0.254824	1	NA	NA	Unknown protein	NA	NA	-0.811026	-0.810038	Turquoise
TRINITY_DN40858_c0_g1	4.33003	0.0762549	2.42274	1	NA	NA	NA	NA	NA	0.831167	0.850603	Turquoise
TRINITY_DN4080_c0_g1	1.41592	0.866122	0.119122	1	NA	NA	Unknown protein	NA	NA	0.881621	0.893882	Turquoise
TRINITY_DN40781_c0_g1	-4.15693	0.000571185	0.0156602	1	tr|A0A446NDY8|A0A446NDY8_TRITD	*-*	PMD domain-containing protein	NA	NA	-0.892306	-0.880364	Turquoise
TRINITY_DN40753_c0_g1	7.89798	0.0793179	0	1	NA	NA	NA	NA	NA	0.815492	0.834685	Turquoise
TRINITY_DN4072_c0_g1	0.473771	1	-0.0430607	1	tr|A0A287M799|A0A287M799_HORVV	***	Rhodanese domain-containing protein	IPR001763 (Rhodanese-like domain)	GO:0005634, GO:0009507, GO:0009534	0.826404	0.823256	Turquoise
TRINITY_DN40664_c0_g1	3.24543	0.284568	0.559533	1	NA	NA	NA	NA	NA	0.88941	0.881937	Turquoise
TRINITY_DN4061_c0_g1	-0.711628	1	0.000532701	1	tr|B6TT59|B6TT59_MAIZE	***	Fiber protein Fb34	IPR009606 (Protein of unknown function DUF1218)	GO:0016020, GO:0016021	-0.878767	-0.875659	Turquoise
TRINITY_DN4058_c0_g1	7.51652	0.0074454	4.94149	0.541274	tr|A0A453MIE3|A0A453MIE3_AEGTS	*-*	Protein kinase domain-containing protein	IPR011009 (Protein kinase-like domain)	NA	0.858117	0.846695	Turquoise
TRINITY_DN40568_c0_g1	3.77531	0.00437228	-1.08026	1	tr|Q8W151|Q8W151_ORYSJ	*-*	Polyprotein	NA	GO:0003676	0.953768	0.951039	Turquoise
TRINITY_DN40557_c0_g2	7.68734	1.74e-07	0	1	NA	NA	NA	NA	NA	0.883334	0.858357	Turquoise
TRINITY_DN4051_c2_g1	3.59811	0.026826	-2.40452	1	NA	NA	NA	NA	NA	0.944662	0.94424	Turquoise
TRINITY_DN40497_c0_g1	1.31234	1	-0.679189	1	NA	NA	NA	NA	NA	0.792739	0.806681	Turquoise
TRINITY_DN4045_c0_g1	0.896701	1	0.072493	1	NA	NA	Unknown protein	NA	NA	0.847718	0.856509	Turquoise
TRINITY_DN4041_c0_g1	0.795623	1	-0.151862	1	tr|A0A287KJD1|A0A287KJD1_HORVV	***	Lipase_GDSL domain-containing protein	IPR013830 (SGNH hydrolase-type esterase domain)	GO:0016020, GO:0016021, GO:0016788	0.861326	0.86091	Turquoise
TRINITY_DN40364_c0_g1	2.89002	0.189962	0.930107	1	NA	NA	NA	NA	NA	0.92447	0.922259	Turquoise
TRINITY_DN403_c0_g1	-0.682141	1	-0.0329289	1	tr|A0A1E5V9R9|A0A1E5V9R9_9POAL	*-*	Protein NRT1/ PTR FAMILY 6.3	IPR000109 (Proton-dependent oligopeptide transporter family), IPR020846 (Major facilitator superfamily domain)	GO:0005215, GO:0006857, GO:0016020, GO:0016021, GO:0022857, GO:0055085	-0.831561	-0.849277	Turquoise
TRINITY_DN40145_c0_g1	2.40288	0.000144683	0.537938	1	NA	NA	NA	NA	NA	0.933826	0.929728	Turquoise
TRINITY_DN40128_c0_g1	1.74053	1	-1.44747	1	NA	NA	NA	NA	NA	0.822567	0.824982	Turquoise
TRINITY_DN40124_c0_g1	1.24723	1	0.229036	1	NA	NA	NA	NA	NA	0.942129	0.938486	Turquoise
TRINITY_DN40120_c0_g4	1.96014	1	-1.95394	1	NA	NA	NA	NA	NA	0.859317	0.868048	Turquoise
TRINITY_DN40097_c0_g1	-4.63131	0.000765899	0.49586	1	NA	NA	NA	NA	NA	-0.828676	-0.814932	Turquoise
TRINITY_DN40014_c0_g1	6.1097	8.91e-05	5.06441	0.0144102	NA	NA	NA	NA	NA	0.798019	0.818967	Turquoise
TRINITY_DN40007_c0_g1	8.46069	0.000548515	4.72807	0.563491	tr|A0A453II24|A0A453II24_AEGTS	***	CCHC-type domain-containing protein	IPR001878 (Zinc finger, CCHC-type)	NA	0.951586	0.94156	Turquoise
TRINITY_DN4000_c0_g1	0.53932	1	0.0418925	1	tr|A0A3B6LIH4|A0A3B6LIH4_WHEAT	***	Proteasome subunit alpha type	IPR000426 (Proteasome alpha-subunit, N-terminal domain), IPR001353 (Proteasome, subunit alpha/beta), IPR029055 (Nucleophile aminohydrolases, N-terminal)	NA	0.901616	0.90899	Turquoise
TRINITY_DN39875_c0_g1	1.97211	0.433167	0.1522	1	NA	NA	Unknown protein	NA	NA	0.870249	0.865215	Turquoise
TRINITY_DN3985_c0_g1	1.51483	0.721984	0.703903	1	tr|B4FEU9|B4FEU9_MAIZE	***	Mitochondrial transcription termination factor family protein	IPR003690 (Transcription termination factor, mitochondrial/chloroplastic)	GO:0003690, GO:0006355, GO:0009507, GO:0009658, GO:0032502	0.805709	0.81086	Turquoise
TRINITY_DN39812_c1_g1	1.71487	1	-5.37106	0.0137162	NA	NA	NA	NA	NA	0.836512	0.834617	Turquoise
TRINITY_DN39806_c0_g1	4.42506	0.00594845	0.303229	1	NA	NA	Unknown protein	NA	NA	0.877572	0.886081	Turquoise
TRINITY_DN39770_c2_g1	4.85628	0.000103383	1.09473	1	NA	NA	NA	NA	NA	0.974126	0.967922	Turquoise
TRINITY_DN3976_c0_g2	1.26233	1	-0.696585	1	NA	NA	NA	NA	NA	0.837439	0.829209	Turquoise
TRINITY_DN3976_c0_g1	-5.75715	1.64e-62	-0.194955	1	NA	NA	NA	NA	NA	-0.955786	-0.955331	Turquoise
TRINITY_DN3968_c0_g3	4.88997	6e-06	2.01413	1	NA	NA	NA	NA	NA	0.928974	0.943133	Turquoise
TRINITY_DN3968_c0_g2	3.71479	0.0905961	1.33706	1	tr|Q2QXF4|Q2QXF4_ORYSJ	*-*	ATP-dependent DNA helicase	IPR012340 (Nucleic acid-binding, OB-fold)	GO:0000166, GO:0000723, GO:0003678, GO:0004386, GO:0005524, GO:0006281, GO:0006310, GO:0006974, GO:0016787, GO:0032508	0.948652	0.952813	Turquoise
TRINITY_DN3962_c3_g1	2.55631	0.000516484	-0.0521302	1	NA	NA	NA	NA	NA	0.892115	0.874232	Turquoise
TRINITY_DN39568_c1_g1	2.87968	0.0250746	1.26833	1	NA	NA	Unknown protein	NA	NA	0.900472	0.893659	Turquoise
TRINITY_DN39545_c0_g2	3.01085	0.0801901	0.809127	1	NA	NA	NA	NA	NA	0.862894	0.848461	Turquoise
TRINITY_DN39532_c2_g3	3.07416	0.225184	0.267211	1	tr|M0Z765|M0Z765_HORVV	***	F-box domain-containing protein	IPR001810 (F-box domain)	NA	0.838564	0.822836	Turquoise
TRINITY_DN3952_c0_g3	2.74857	0.811439	-3.69039	1	NA	NA	NA	NA	NA	0.846674	0.824541	Turquoise
TRINITY_DN39396_c0_g1	3.20165	0.152686	-4.11283	0.356172	NA	NA	NA	NA	NA	0.940239	0.945055	Turquoise
TRINITY_DN3934_c2_g1	1.50261	0.804075	-0.122228	1	NA	NA	Unknown protein	NA	NA	0.902274	0.906357	Turquoise
TRINITY_DN39257_c0_g2	2.47372	0.608594	-0.630073	1	NA	NA	NA	NA	NA	0.831081	0.845661	Turquoise
TRINITY_DN3920_c1_g1	1.07034	1	0.226527	1	tr|A0A446M4E6|A0A446M4E6_TRITD	***	GRAS domain-containing protein	IPR005202 (Transcription factor GRAS)	NA	0.879865	0.878712	Turquoise
TRINITY_DN39160_c0_g1	4.67738	0.0116743	-1.42155	1	NA	NA	NA	NA	NA	0.903188	0.903609	Turquoise
TRINITY_DN3915_c4_g1	1.47773	1	-0.526358	1	NA	NA	NA	NA	NA	0.823248	0.837981	Turquoise
TRINITY_DN3915_c1_g1	5.95845	0.000549081	-0.0162789	1	NA	NA	NA	NA	NA	0.876002	0.886007	Turquoise
TRINITY_DN39100_c0_g1	5.47494	0.000783937	4.26306	0.100343	NA	NA	Unknown protein	NA	NA	0.817831	0.806649	Turquoise
TRINITY_DN3906_c0_g2	5.85259	6.8e-06	0.817459	1	NA	NA	Unknown protein	NA	NA	0.967918	0.970987	Turquoise
TRINITY_DN39052_c1_g1	6.42911	2.27e-05	-0.592295	1	NA	NA	NA	NA	NA	0.965617	0.970658	Turquoise
TRINITY_DN3902_c0_g1	0.900314	1	0.0460963	1	tr|B4FHA0|B4FHA0_MAIZE	***	Thylakoid lumenal 17.4 kDa protein chloroplastic	IPR001646 (Pentapeptide repeat)	NA	0.900361	0.889435	Turquoise
TRINITY_DN39_c3_g1	2.57057	0.00218127	0.673732	1	NA	NA	NA	NA	NA	0.895439	0.908107	Turquoise
TRINITY_DN39_c2_g1	11.8364	1.22e-06	9.6418	0.00089941	NA	NA	Unknown protein	NA	NA	0.808288	0.804164	Turquoise
TRINITY_DN38996_c0_g1	6.58638	7.92e-06	-0.563575	1	tr|A0A3B6N0Y4|A0A3B6N0Y4_WHEAT	*-*	NB-ARC domain-containing protein	NA	NA	0.976569	0.973197	Turquoise
TRINITY_DN38822_c0_g1	4.60446	0.208028	2.66583	1	tr|A0A0D9YKK6|A0A0D9YKK6_9ORYZ	***	TF-B3 domain-containing protein	NA	GO:0003677, GO:0005634	0.902369	0.907527	Turquoise
TRINITY_DN3881_c0_g1	-2.13313	1	0.184464	1	tr|A0A446LJF8|A0A446LJF8_TRITD	***	Skp1 domain-containing protein	IPR001232 (S-phase kinase-associated protein 1-like), IPR011333 (SKP1/BTB/POZ domain), IPR016072 (SKP1 component, dimerisation)	NA	-0.889216	-0.879469	Turquoise
TRINITY_DN38785_c0_g1	4.41785	0.00167122	-0.260675	1	tr|I1H7W0|I1H7W0_BRADI	*-*	Cyclin N-terminal domain-containing protein	NA	GO:0000079, GO:0000278, GO:0000307, GO:0005634, GO:0005737, GO:0006468, GO:0007088, GO:0007129, GO:0008284, GO:0016538, GO:0019901, GO:0045787	0.822788	0.810746	Turquoise
TRINITY_DN3877_c0_g1	0.921245	1	0.234024	1	tr|A0A1D6F1T8|A0A1D6F1T8_MAIZE	*-*	SAP domain-containing protein	NA	NA	0.935414	0.935292	Turquoise
TRINITY_DN38740_c0_g1	-2.91193	0.0168084	-0.188359	1	NA	NA	NA	NA	NA	-0.856297	-0.848703	Turquoise
TRINITY_DN38733_c0_g1	-1.01237	1	-0.165149	1	tr|A0A199UR49|A0A199UR49_ANACO	*-*	Protein LURP-one-related 8	IPR025659 (Tubby C-terminal-like domain)	NA	-0.809261	-0.824684	Turquoise
TRINITY_DN38690_c1_g1	5.53187	0.00014174	3.05591	0.639214	NA	NA	Unknown protein	NA	NA	0.848981	0.870955	Turquoise
TRINITY_DN3858_c0_g1	1.05712	1	-0.0723988	1	tr|M8AYV4|M8AYV4_AEGTA	***	Two-component response regulator-like PRR1	IPR010402 (CCT domain), IPR011006 (CheY-like superfamily)	GO:0000160, GO:0003677, GO:0003700, GO:0005634, GO:0006355, GO:0007623, GO:0010031, GO:0010468, GO:0010629	0.860463	0.868081	Turquoise
TRINITY_DN3856_c0_g1	2.79701	8.57e-17	0.200185	1	tr|A0A1D6QSE8|A0A1D6QSE8_MAIZE	*-*	Cullin-associated NEDD8-dissociated protein 1	IPR016024 (Armadillo-type fold)	GO:0005634, GO:0010265, GO:0016567	0.983342	0.982355	Turquoise
TRINITY_DN3842_c0_g2	4.21716	0.659595	0.481406	1	NA	NA	Unknown protein	NA	NA	0.911789	0.922554	Turquoise
TRINITY_DN3842_c0_g1	2.94464	0.157918	0.729752	1	NA	NA	NA	NA	NA	0.867184	0.880229	Turquoise
TRINITY_DN38389_c0_g1	4.00866	0.0236502	2.75149	0.860376	tr|A0A3L6SVZ7|A0A3L6SVZ7_PANMI	***	F-box domain-containing protein	IPR001810 (F-box domain), IPR032675 (Leucine-rich repeat domain, L domain-like)	NA	0.835665	0.84298	Turquoise
TRINITY_DN38376_c0_g1	1.37034	0.918898	0.58383	1	NA	NA	NA	NA	NA	0.831085	0.826455	Turquoise
TRINITY_DN38355_c1_g1	2.74809	0.159631	-0.486821	1	NA	NA	NA	NA	NA	0.813476	0.804714	Turquoise
TRINITY_DN38251_c0_g1	4.15379	1.78e-05	2.4024	0.475313	NA	NA	NA	NA	NA	0.879582	0.870916	Turquoise
TRINITY_DN38199_c0_g1	2.17596	0.148757	0.117696	1	NA	NA	NA	NA	NA	0.911992	0.917722	Turquoise
TRINITY_DN3819_c0_g1	-0.973073	1	0.106089	1	NA	NA	Unknown protein	NA	NA	-0.817073	-0.823005	Turquoise
TRINITY_DN38157_c0_g2	4.94799	0.000331574	-1.00544	1	NA	NA	NA	NA	NA	0.881232	0.874349	Turquoise
TRINITY_DN3803_c0_g1	1.02743	1	0.0964345	1	tr|A0A1D6KJP5|A0A1D6KJP5_MAIZE	***	FK506-binding protein 2-1	NA	NA	0.923759	0.917029	Turquoise
TRINITY_DN3801_c0_g1	2.32213	0.224998	-0.378902	1	NA	NA	Unknown protein	NA	NA	0.954963	0.952121	Turquoise
TRINITY_DN380_c0_g1	-1.53279	0.27746	0.292833	1	tr|A0A0E0R9Q0|A0A0E0R9Q0_ORYRU	*-*	Methyltranfer_dom domain-containing protein	NA	GO:0016020, GO:0016021	-0.877064	-0.865242	Turquoise
TRINITY_DN38_c1_g2	-2.70526	3.72e-07	0.459626	1	NA	NA	Unknown protein	NA	NA	-0.886418	-0.876852	Turquoise
TRINITY_DN37935_c0_g1	-5.58257	0.000811099	0.229513	1	tr|A0A1D6EPB7|A0A1D6EPB7_MAIZE	*-*	Histone-lysine N-methyltransferase H3 lysine-9 specific SUVH5	NA	GO:0005634, GO:0005694, GO:0008168, GO:0008270, GO:0016571, GO:0016740, GO:0018024, GO:0032259, GO:0034968	-0.826984	-0.816058	Turquoise
TRINITY_DN3785_c1_g1	0.801282	1	-0.329535	1	sp|P0CG83|UBIQP_HORVU	***	Polyubiquitin	IPR019956 (Ubiquitin), IPR029071 (Ubiquitin-related domain)	GO:0005634, GO:0005737	0.813837	0.815548	Turquoise
TRINITY_DN3783_c3_g1	1.15439	1	0.102456	1	NA	NA	NA	NA	NA	0.876799	0.89764	Turquoise
TRINITY_DN37827_c1_g1	1.53377	0.922397	-0.540667	1	NA	NA	NA	NA	NA	0.924212	0.916995	Turquoise
TRINITY_DN37819_c0_g1	2.16261	1	-0.38134	1	NA	NA	NA	NA	NA	0.82926	0.82829	Turquoise
TRINITY_DN3776_c0_g1	0.504414	1	-0.27962	1	tr|A0A1E5URP3|A0A1E5URP3_9POAL	*-*	Poly(A) polymerase I	IPR002646 (Poly A polymerase, head domain)	GO:0003723, GO:0006396, GO:0016740, GO:0016779	0.842124	0.820604	Turquoise
TRINITY_DN3773_c0_g1	-0.872485	1	0.140976	1	tr|A0A4U6UAU2|A0A4U6UAU2_SETVI	***	Amidase domain-containing protein	IPR000120 (Amidase), IPR023631 (Amidase signature domain)	NA	-0.880235	-0.876809	Turquoise
TRINITY_DN37675_c0_g2	5.84955	0.00245118	0	1	NA	NA	Unknown protein	NA	NA	0.893	0.91023	Turquoise
TRINITY_DN3767_c0_g1	2.37256	0.462763	0.719085	1	NA	NA	NA	NA	NA	0.922308	0.923201	Turquoise
TRINITY_DN37633_c1_g4	3.85863	0.0563503	2.23369	1	NA	NA	NA	NA	NA	0.871899	0.888311	Turquoise
TRINITY_DN376_c0_g3	-9.03095	1.15e-13	-0.132392	1	NA	NA	NA	NA	NA	-0.883174	-0.879726	Turquoise
TRINITY_DN37558_c0_g1	3.31696	0.0510544	1.1703	1	NA	NA	NA	NA	NA	0.844901	0.851125	Turquoise
TRINITY_DN3755_c3_g1	2.59787	1.1e-06	-0.220296	1	NA	NA	NA	NA	NA	0.949215	0.945683	Turquoise
TRINITY_DN37506_c0_g1	1.2165	1	-0.0673662	1	tr|A0A3L6EB34|A0A3L6EB34_MAIZE	***	Protein JASON	NA	NA	0.837373	0.852984	Turquoise
TRINITY_DN37497_c0_g1	7.83493	3.79e-08	0	1	NA	NA	Unknown protein	NA	NA	0.907065	0.904689	Turquoise
TRINITY_DN37494_c0_g2	5.29989	0.00316818	-1.7564	1	tr|A0A4U6VP58|A0A4U6VP58_SETVI	*-*	CCHC-type domain-containing protein	NA	NA	0.835197	0.834289	Turquoise
TRINITY_DN37467_c0_g2	2.80956	0.0849456	1.28312	1	tr|A0A2N9IMQ9|A0A2N9IMQ9_FAGSY	*-*	Integrase catalytic domain-containing protein	NA	GO:0000943, GO:0003676, GO:0004553, GO:0005975, GO:0015074	0.832256	0.828649	Turquoise
TRINITY_DN37415_c0_g1	4.51478	0.000123951	-0.913728	1	NA	NA	NA	NA	NA	0.902176	0.914511	Turquoise
TRINITY_DN37395_c0_g1	5.94133	0.00158932	0	1	NA	NA	NA	NA	NA	0.910241	0.915372	Turquoise
TRINITY_DN37387_c0_g1	1.28817	1	-0.00473617	1	NA	NA	NA	NA	NA	0.863932	0.865269	Turquoise
TRINITY_DN37369_c1_g4	4.00229	0.0376488	-2.15073	1	tr|A0A446L6Y4|A0A446L6Y4_TRITD	*-*	DUF295 domain-containing protein	NA	NA	0.902385	0.89275	Turquoise
TRINITY_DN37292_c0_g1	9.63325	0.000662119	5.73905	0.397806	NA	NA	Unknown protein	NA	NA	0.803575	0.807621	Turquoise
TRINITY_DN37242_c2_g1	5.94917	0.000784292	2.1547	1	NA	NA	NA	NA	NA	0.879519	0.871407	Turquoise
TRINITY_DN3715_c0_g1	0.723134	1	-0.941368	1	tr|A0A453RZR9|A0A453RZR9_AEGTS	***	RING-type domain-containing protein	IPR002035 (von Willebrand factor, type A), IPR010734 (Copine)	NA	0.849035	0.828838	Turquoise
TRINITY_DN3712_c0_g1	-0.668155	1	-0.146131	1	tr|A0A1U8AQW1|A0A1U8AQW1_NELNU	***	BRCA1-A complex subunit BRE	IPR010358 (Brain/reproductive organ-expressed protein)	GO:0070531, GO:0070552	-0.894397	-0.912501	Turquoise
TRINITY_DN3705_c0_g1	-2.16348	0.00121222	-0.471854	1	tr|A0A0A9M4T2|A0A0A9M4T2_ARUDO	***	Glycosyltransferase	IPR002213 (UDP-glucuronosyl/UDP-glucosyltransferase)	GO:0016740, GO:0016757, GO:0016758	-0.788042	-0.801864	Turquoise
TRINITY_DN37023_c0_g1	5.53403	0.00108392	0.984497	1	NA	NA	NA	NA	NA	0.94551	0.943369	Turquoise
TRINITY_DN36965_c0_g1	6.15606	0.00261488	2.59635	1	NA	NA	NA	NA	NA	0.928321	0.92501	Turquoise
TRINITY_DN36923_c0_g1	0.525754	1	-0.246412	1	tr|A0A446XE69|A0A446XE69_TRITD	***	BZIP domain-containing protein	IPR004827 (Basic-leucine zipper domain)	NA	0.80798	0.802573	Turquoise
TRINITY_DN36872_c0_g1	4.05489	0.0908688	0.841586	1	tr|K3XJ70|K3XJ70_SETIT	*-*	PDZ domain-containing protein	IPR009003 (Peptidase S1, PA clan)	NA	0.923947	0.917769	Turquoise
TRINITY_DN36827_c0_g1	1.95165	0.429925	0.568466	1	NA	NA	NA	NA	NA	0.829983	0.851896	Turquoise
TRINITY_DN36822_c0_g1	6.36502	0.000295532	3.96489	0.375278	tr|B9F9E3|B9F9E3_ORYSJ	*-*	SWIM-type domain-containing protein	IPR004330 (FAR1 DNA binding domain), IPR018289 (MULE transposase domain), IPR031052 (FHY3/FAR1 family)	GO:0006355, GO:0008270	0.867647	0.864708	Turquoise
TRINITY_DN36704_c0_g1	4.22148	0.00125822	-3.09296	0.978194	NA	NA	NA	NA	NA	0.931486	0.941927	Turquoise
TRINITY_DN36702_c0_g1	6.74827	5.68e-05	2.05562	1	tr|M8C1V6|M8C1V6_AEGTA	*-*	Autophagy-related protein 2	NA	GO:0006914, GO:0030242	0.943006	0.936861	Turquoise
TRINITY_DN36691_c0_g1	4.36343	0.0178179	1.63732	1	NA	NA	NA	NA	NA	0.939846	0.951139	Turquoise
TRINITY_DN3668_c0_g1	0.902884	1	0.0227833	1	tr|M0TVW0|M0TVW0_MUSAM	***	Fibronectin type-III domain-containing protein	IPR032881 (Oberon, PHD finger domain)	GO:0016020, GO:0016021	0.933097	0.933401	Turquoise
TRINITY_DN36625_c0_g1	5.47343	0.0147398	3.6092	0.789082	NA	NA	NA	NA	NA	0.843642	0.838169	Turquoise
TRINITY_DN3662_c0_g4	2.28436	0.769738	0.639698	1	NA	NA	NA	NA	NA	0.784303	0.804027	Turquoise
TRINITY_DN36613_c0_g1	2.77076	0.315733	-3.61058	0.627013	NA	NA	NA	NA	NA	0.896267	0.909371	Turquoise
TRINITY_DN36577_c0_g2	2.37334	1	0.351492	1	tr|A0A453QA37|A0A453QA37_AEGTS	***	zf-RVT domain-containing protein	IPR026960 (Reverse transcriptase zinc-binding domain)	NA	0.786181	0.804427	Turquoise
TRINITY_DN3657_c4_g1	2.06304	0.0258008	0.164532	1	NA	NA	NA	NA	NA	0.920148	0.913643	Turquoise
TRINITY_DN3656_c0_g1	0.834482	1	-0.50464	1	tr|A0A446UWE7|A0A446UWE7_TRITD	***	F-box domain-containing protein	IPR001810 (F-box domain), IPR032675 (Leucine-rich repeat domain, L domain-like)	NA	0.808099	0.812219	Turquoise
TRINITY_DN36540_c1_g1	3.0411	0.174756	0.372971	1	NA	NA	NA	NA	NA	0.940577	0.938539	Turquoise
TRINITY_DN3651_c1_g1	2.20569	0.222109	-1.00974	1	NA	NA	NA	NA	NA	0.919638	0.90336	Turquoise
TRINITY_DN3651_c0_g1	0.465821	1	-0.0440218	1	sp|P21568|CYPH_SOLLC	***	Peptidyl-prolyl cis-trans isomerase	IPR002130 (Cyclophilin-type peptidyl-prolyl cis-trans isomerase domain), IPR024936 (Cyclophilin-type peptidyl-prolyl cis-trans isomerase), IPR029000 (Cyclophilin-like domain)	GO:0000413, GO:0001932, GO:0003755, GO:0005737, GO:0005774, GO:0005794, GO:0005829, GO:0005886, GO:0006457, GO:0009506, GO:0009507, GO:0009704, GO:0009735, GO:0009742, GO:0016018, GO:0016853, GO:0048046, GO:0051082	0.855339	0.856073	Turquoise
TRINITY_DN36501_c0_g1	2.81735	0.661071	-2.63964	1	tr|A0A3B5YT01|A0A3B5YT01_WHEAT	***	DUF295 domain-containing protein	IPR005174 (Domain unknown function DUF295), IPR011043 (Galactose oxidase/kelch, beta-propeller)	NA	0.861543	0.846834	Turquoise
TRINITY_DN36484_c1_g3	8.15334	0.00139257	3.42158	1	NA	NA	Unknown protein	NA	NA	0.978169	0.977752	Turquoise
TRINITY_DN3644_c0_g1	0.718021	1	0.242559	1	tr|A0A3B6U378|A0A3B6U378_WHEAT	***	Phosphatidate cytidylyltransferase	IPR000374 (Phosphatidate cytidylyltransferase)	NA	0.844143	0.853861	Turquoise
TRINITY_DN36417_c0_g2	7.12849	2.26e-05	1.14322	1	NA	NA	NA	NA	NA	0.871246	0.855048	Turquoise
TRINITY_DN36371_c0_g1	1.44083	1	-0.238439	1	NA	NA	NA	NA	NA	0.848446	0.840507	Turquoise
TRINITY_DN36297_c0_g1	1.99877	0.0622742	0.340649	1	NA	NA	NA	NA	NA	0.904557	0.911273	Turquoise
TRINITY_DN36280_c1_g2	-2.243	0.398038	0.0989283	1	tr|M8CZN5|M8CZN5_AEGTA	***	SKP1-like protein 4	IPR001232 (S-phase kinase-associated protein 1-like), IPR011333 (SKP1/BTB/POZ domain), IPR016072 (SKP1 component, dimerisation)	GO:0006511	-0.824288	-0.823562	Turquoise
TRINITY_DN36224_c0_g1	4.79597	0.0376481	2.35064	1	NA	NA	NA	NA	NA	0.814258	0.805829	Turquoise
TRINITY_DN36166_c1_g1	2.64661	0.494755	0.954394	1	NA	NA	NA	NA	NA	0.842093	0.848135	Turquoise
TRINITY_DN36130_c0_g2	3.11199	0.801505	0.132783	1	NA	NA	NA	NA	NA	0.920551	0.915873	Turquoise
TRINITY_DN36130_c0_g1	3.26332	NA	0.926606	NA	tr|A0A0Q3F0N7|A0A0Q3F0N7_BRADI	*-*	L-aspartate oxidase	NA	GO:0005737, GO:0008734, GO:0009435, GO:0009507, GO:0016491, GO:0019363, GO:0044318, GO:0055114	0.922859	0.919858	Turquoise
TRINITY_DN36100_c0_g1	-5.03712	6.57e-07	-0.0238787	1	NA	NA	NA	NA	NA	-0.805627	-0.818066	Turquoise
TRINITY_DN36099_c1_g1	3.7995	0.00584149	-2.76743	1	NA	NA	NA	NA	NA	0.956314	0.938639	Turquoise
TRINITY_DN36078_c0_g1	-7.67972	2.83e-09	0.0190927	1	NA	NA	Unknown protein	NA	NA	-0.912781	-0.91228	Turquoise
TRINITY_DN3603_c0_g2	3.5282	0.0770291	1.18683	1	NA	NA	NA	NA	NA	0.909841	0.924943	Turquoise
TRINITY_DN36025_c0_g1	3.86562	8.32e-08	0.899406	1	tr|A0A446L5A0|A0A446L5A0_TRITD	***	Methyltransf_11 domain-containing protein	IPR029063 (S-adenosyl-L-methionine-dependent methyltransferase)	NA	0.963543	0.962487	Turquoise
TRINITY_DN36_c0_g2	2.08826	1	-0.474652	1	NA	NA	Unknown protein	NA	NA	0.936047	0.942329	Turquoise
TRINITY_DN35838_c0_g1	5.9425	6.72e-09	1.82077	1	tr|A0A2R6P8X1|A0A2R6P8X1_ACTCC	***	DEAD-box ATP-dependent RNA helicase	IPR001650 (Helicase, C-terminal), IPR014001 (Helicase superfamily 1/2, ATP-binding domain), IPR014014 (RNA helicase, DEAD-box type, Q motif), IPR027417 (P-loop containing nucleoside triphosphate hydrolase)	GO:0003676, GO:0004386, GO:0005524	0.898001	0.891139	Turquoise
TRINITY_DN358_c0_g1	0.940557	1	0.0666793	1	NA	NA	Unknown protein	NA	NA	0.803859	0.80477	Turquoise
TRINITY_DN35739_c0_g1	2.25494	1	-0.67685	1	NA	NA	NA	NA	NA	0.830988	0.841197	Turquoise
TRINITY_DN35685_c0_g1	2.44848	0.567562	-2.75394	1	NA	NA	NA	NA	NA	0.906178	0.89546	Turquoise
TRINITY_DN3567_c3_g1	2.57715	0.226909	0.648577	1	tr|A0A2T8KP85|A0A2T8KP85_9POAL	***	Protein kinase domain-containing protein	IPR011009 (Protein kinase-like domain)	GO:0000166, GO:0004672, GO:0004674, GO:0005524, GO:0006468	0.93252	0.921682	Turquoise
TRINITY_DN3567_c0_g1	-4.79209	0.0369992	0.128432	1	tr|M7YDP0|M7YDP0_TRIUA	*-*	Coatomer subunit beta'-2	IPR011009 (Protein kinase-like domain)	GO:0004672, GO:0005524, GO:0006468	-0.867494	-0.845351	Turquoise
TRINITY_DN3565_c0_g2	5.77999	0.0052036	0	1	NA	NA	Unknown protein	NA	NA	0.851835	0.867551	Turquoise
TRINITY_DN35643_c0_g1	4.3465	0.0117183	1.55517	1	NA	NA	NA	NA	NA	0.92142	0.935541	Turquoise
TRINITY_DN3556_c1_g1	1.46506	1	0.234948	1	NA	NA	NA	NA	NA	0.802756	0.82186	Turquoise
TRINITY_DN3556_c0_g1	1.02498	1	0.414003	1	tr|A0A0A9UH81|A0A0A9UH81_ARUDO	***	Thioredoxin domain-containing protein	IPR005746 (Thioredoxin), IPR012336 (Thioredoxin-like fold)	GO:0005623, GO:0006662, GO:0015035, GO:0045454, GO:0055114	0.82685	0.823942	Turquoise
TRINITY_DN35543_c2_g1	4.3878	0.134538	2.16579	1	NA	NA	NA	NA	NA	0.816831	0.834017	Turquoise
TRINITY_DN35530_c0_g1	3.54492	0.0994673	1.81264	1	NA	NA	NA	NA	NA	0.814336	0.81095	Turquoise
TRINITY_DN35493_c0_g1	8.02329	5.92e-07	3.34665	0.896526	tr|T2ASC0|T2ASC0_WHEAT	*-*	Protein kinase	IPR011009 (Protein kinase-like domain)	GO:0000166, GO:0004672, GO:0004674, GO:0005524, GO:0006468, GO:0016301, GO:0016310	0.828303	0.855599	Turquoise
TRINITY_DN3546_c0_g1	0.980921	1	-0.247134	1	tr|A0A3B6HSS2|A0A3B6HSS2_WHEAT	***	TPX2 domain-containing protein	IPR009675 (TPX2), IPR027329 (TPX2, C-terminal)	NA	0.784944	0.805753	Turquoise
TRINITY_DN35455_c0_g1	3.57687	0.0520082	-2.67035	1	NA	NA	NA	NA	NA	0.881603	0.862948	Turquoise
TRINITY_DN35442_c0_g1	6.28768	0.0357897	3.37797	1	NA	NA	NA	NA	NA	0.872179	0.873548	Turquoise
TRINITY_DN35440_c0_g1	1.43696	1	0.302793	1	tr|A0A1D6IPM0|A0A1D6IPM0_MAIZE	***	Reverse transcriptase domain-containing protein	IPR000477 (Reverse transcriptase domain), IPR026960 (Reverse transcriptase zinc-binding domain)	GO:0003677, GO:0004519, GO:0006281, GO:0090305	0.811918	0.81469	Turquoise
TRINITY_DN3540_c0_g1	0.738977	1	-0.445664	1	tr|B4FLW9|B4FLW9_MAIZE	*-*	ABC2_membrane domain-containing protein	NA	GO:0016020, GO:0016021	0.87308	0.867829	Turquoise
TRINITY_DN35339_c1_g1	-4.43699	0.00808537	0.400231	1	NA	NA	NA	NA	NA	-0.808259	-0.806839	Turquoise
TRINITY_DN35327_c0_g1	-4.03737	7.94e-07	-0.407294	1	AT3G14470.1	***	NB-ARC domain-containing disease resistance protein	IPR001611 (Leucine-rich repeat), IPR002182 (NB-ARC), IPR027417 (P-loop containing nucleoside triphosphate hydrolase), IPR032675 (Leucine-rich repeat domain, L domain-like)	NA	-0.850536	-0.845054	Turquoise
TRINITY_DN3532_c0_g1	-8.74045	9.79e-12	0.497404	1	tr|M0YZA8|M0YZA8_HORVV	*-*	Protein kinase domain-containing protein	IPR011009 (Protein kinase-like domain)	GO:0004672, GO:0005524, GO:0006468	-0.848232	-0.831122	Turquoise
TRINITY_DN35299_c0_g2	3.9316	0.402174	-2.8715	1	NA	NA	NA	NA	NA	0.90219	0.903251	Turquoise
TRINITY_DN3522_c0_g1	3.2546	0.267939	-0.00459366	1	NA	NA	NA	NA	NA	0.944728	0.953545	Turquoise
TRINITY_DN35216_c0_g1	2.95278	0.685253	-1.95162	1	NA	NA	NA	NA	NA	0.872525	0.877312	Turquoise
TRINITY_DN3521_c0_g1	-0.741113	1	-0.0769514	1	tr|M8ARJ3|M8ARJ3_AEGTA	***	SelT-like protein	IPR011893 (Selenoprotein, Rdx type), IPR012336 (Thioredoxin-like fold)	NA	-0.807994	-0.801125	Turquoise
TRINITY_DN3511_c0_g1	0.490045	1	0.144536	1	AT1G16720.1	***	high chlorophyll fluorescence phenotype 173	IPR008979 (Galactose-binding domain-like), IPR013857 (NADH:ubiquinone oxidoreductase intermediate-associated protein 30), IPR016040 (NAD(P)-binding domain)	NA	0.80584	0.808291	Turquoise
TRINITY_DN35067_c0_g1	3.3928	1	-0.963973	1	tr|A0A1E5VEY9|A0A1E5VEY9_9POAL	*-*	Non-specific serine/threonine protein kinase	IPR020636 (Calcium/calmodulin-dependent/calcium-dependent protein kinase)	GO:0000166, GO:0004672, GO:0004674, GO:0005524, GO:0006468, GO:0007165, GO:0016020, GO:0016021, GO:0016301, GO:0016310, GO:0016740	0.93742	0.930161	Turquoise
TRINITY_DN3506_c0_g1	0.975699	1	0.0260427	1	tr|A0A2P5CA15|A0A2P5CA15_TREOI	***	ATP-dependent Clp protease ATP-binding subunit	NA	GO:0005524, GO:0006508, GO:0008233	0.880607	0.896039	Turquoise
TRINITY_DN35_c2_g1	7.76195	2.01e-06	5.35579	0.0279801	NA	NA	NA	NA	NA	0.813175	0.805939	Turquoise
TRINITY_DN34969_c0_g1	0.904353	1	0.125799	1	tr|A0A446K0C2|A0A446K0C2_TRITD	***	Endo/exonuclease/phosphatase domain-containing protein	IPR005135 (Endonuclease/exonuclease/phosphatase)	NA	0.86654	0.855434	Turquoise
TRINITY_DN34930_c0_g2	9.36431	4.51e-13	-0.012007	1	tr|A0A3B6PP17|A0A3B6PP17_WHEAT	*-*	Protein kinase domain-containing protein	IPR001611 (Leucine-rich repeat), IPR003591 (Leucine-rich repeat, typical subtype), IPR013210 (Leucine-rich repeat-containing N-terminal, plant-type), IPR032675 (Leucine-rich repeat domain, L domain-like)	NA	0.851687	0.826454	Turquoise
TRINITY_DN34893_c0_g1	2.264	0.942883	-1.28792	1	tr|M7ZF50|M7ZF50_TRIUA	***	Receptor-like serine/threonine-protein kinase	IPR001480 (Bulb-type lectin domain), IPR003609 (PAN/Apple domain), IPR011009 (Protein kinase-like domain), IPR013320 (Concanavalin A-like lectin/glucanase domain), IPR024171 (S-receptor-like serine/threonine-protein kinase)	GO:0000166, GO:0004672, GO:0004674, GO:0005524, GO:0006468, GO:0016020, GO:0016021, GO:0016301, GO:0016310, GO:0016740, GO:0030246	0.850263	0.847597	Turquoise
TRINITY_DN34873_c0_g1	3.79412	0.0213018	2.01999	1	NA	NA	NA	NA	NA	0.909827	0.916692	Turquoise
TRINITY_DN34810_c0_g1	1.43227	1	-0.415877	1	tr|A0A2K2DHD7|A0A2K2DHD7_BRADI	***	Tr-type G domain-containing protein	IPR000640 (Translation elongation factor EFG, V domain), IPR009000 (Translation protein, beta-barrel domain), IPR009022 (Elongation factor G, III-V domain), IPR020568 (Ribosomal protein S5 domain 2-type fold)	GO:0003924, GO:0005525	0.835876	0.854572	Turquoise
TRINITY_DN34792_c0_g1	7.87102	6.77e-09	0	1	tr|A0A287TRG6|A0A287TRG6_HORVV	*-*	Reverse transcriptase domain-containing protein	IPR026960 (Reverse transcriptase zinc-binding domain)	GO:0003676, GO:0004523, GO:0090502	0.949024	0.95252	Turquoise
TRINITY_DN34752_c0_g1	2.19125	0.743972	-0.142739	1	NA	NA	NA	NA	NA	0.906045	0.917967	Turquoise
TRINITY_DN34736_c0_g3	1.05195	1	-3.34743	0.22949	NA	NA	NA	NA	NA	0.822134	0.820346	Turquoise
TRINITY_DN34731_c1_g5	5.84994	0.00915663	0	1	NA	NA	NA	NA	NA	0.827052	0.804399	Turquoise
TRINITY_DN34686_c0_g2	6.04209	0.00192138	3.86345	0.519654	NA	NA	NA	NA	NA	0.877802	0.873624	Turquoise
TRINITY_DN3468_c0_g1	0.379568	1	0.0734058	1	tr|A0A1D6NZR8|A0A1D6NZR8_MAIZE	***	UPF0061 protein azo1574	IPR003846 (Uncharacterised protein family UPF0061)	GO:0009414, GO:0009507, GO:0009534, GO:0009570	0.823433	0.836808	Turquoise
TRINITY_DN3467_c0_g1	1.15874	1	-0.0398572	1	tr|A0A287J0U2|A0A287J0U2_HORVV	***	Gamma-tubulin complex component	IPR007259 (Gamma-tubulin complex component protein)	GO:0000226, GO:0000922, GO:0005737, GO:0005815, GO:0005856, GO:0005874, GO:0007020, GO:0043015	0.950077	0.956112	Turquoise
TRINITY_DN3464_c0_g1	1.49191	0.445269	0.101956	1	tr|A0A3B6ECZ3|A0A3B6ECZ3_WHEAT	*-*	Protein kinase domain-containing protein	IPR025287 (Wall-associated receptor kinase, galacturonan-binding domain), IPR032872 (Wall-associated receptor kinase, C-terminal)	NA	0.928305	0.939592	Turquoise
TRINITY_DN3462_c0_g2	9.84018	1.13e-17	-0.59221	1	NA	NA	NA	NA	NA	0.985166	0.990996	Turquoise
TRINITY_DN346_c6_g1	1.416	1	0.334073	1	tr|A0A444DLD0|A0A444DLD0_ENSVE	*-*	Transmembrane 9 superfamily member	NA	NA	0.851181	0.840635	Turquoise
TRINITY_DN346_c1_g1	1.81943	0.132422	0.493841	1	NA	NA	NA	NA	NA	0.886632	0.906144	Turquoise
TRINITY_DN3459_c0_g1	4.04118	0.0987971	2.78945	1	NA	NA	NA	NA	NA	0.81292	0.826012	Turquoise
TRINITY_DN3454_c0_g3	3.47331	0.00616435	1.63342	1	NA	NA	NA	NA	NA	0.895094	0.905047	Turquoise
TRINITY_DN3454_c0_g1	2.38542	0.425323	0.930368	1	NA	NA	NA	NA	NA	0.843008	0.853943	Turquoise
TRINITY_DN34501_c0_g3	4.70169	0.00268434	2.9346	0.711663	NA	NA	NA	NA	NA	0.920923	0.926857	Turquoise
TRINITY_DN34461_c0_g2	3.7821	0.58014	1.03397	1	tr|N1R5S6|N1R5S6_AEGTA	*-*	DUF295 domain-containing protein	IPR005174 (Domain unknown function DUF295)	NA	0.840438	0.837133	Turquoise
TRINITY_DN34430_c0_g1	1.82975	0.557814	0.372029	1	NA	NA	NA	NA	NA	0.850881	0.867161	Turquoise
TRINITY_DN3436_c0_g1	-3.68721	2e-08	-0.614251	1	tr|R7WCN2|R7WCN2_AEGTA	***	Disease resistance RPP13-like protein 4	IPR032675 (Leucine-rich repeat domain, L domain-like)	NA	-0.865607	-0.863542	Turquoise
TRINITY_DN3435_c0_g1	10.4247	0.000393879	6.23212	0.338151	NA	NA	NA	NA	NA	0.951074	0.950088	Turquoise
TRINITY_DN34304_c0_g3	2.57796	0.776641	0.842959	1	NA	NA	NA	NA	NA	0.795391	0.804101	Turquoise
TRINITY_DN343_c0_g2	1.45729	0.891798	0.39498	1	NA	NA	NA	NA	NA	0.847357	0.85074	Turquoise
TRINITY_DN34298_c0_g1	2.67793	0.329298	0.786028	1	NA	NA	NA	NA	NA	0.863336	0.868435	Turquoise
TRINITY_DN3427_c2_g1	3.05534	0.365945	1.60708	1	NA	NA	Unknown protein	NA	NA	0.827792	0.825547	Turquoise
TRINITY_DN34216_c0_g1	2.03097	1	-3.35866	0.943939	tr|I1HN36|I1HN36_BRADI	*-*	NB-ARC domain-containing protein	IPR002182 (NB-ARC), IPR027417 (P-loop containing nucleoside triphosphate hydrolase)	GO:0043531	0.920585	0.89824	Turquoise
TRINITY_DN34187_c0_g1	3.09952	0.00164327	1.52714	1	NA	NA	Unknown protein	NA	NA	0.866589	0.872112	Turquoise
TRINITY_DN34119_c0_g2	2.86999	0.294964	-1.04735	1	tr|A0A446XC83|A0A446XC83_TRITD	***	Protein kinase domain-containing protein	IPR011009 (Protein kinase-like domain), IPR013320 (Concanavalin A-like lectin/glucanase domain)	NA	0.872634	0.870965	Turquoise
TRINITY_DN34058_c0_g1	1.86788	0.843917	-0.36593	1	NA	NA	NA	NA	NA	0.875223	0.898607	Turquoise
TRINITY_DN3405_c2_g1	3.06177	0.0137671	0.765203	1	NA	NA	Unknown protein	NA	NA	0.893848	0.910567	Turquoise
TRINITY_DN3403_c0_g1	1.83651	0.560663	0.732171	1	tr|A0A287NZB2|A0A287NZB2_HORVV	*-*	Cauli_VI domain-containing protein	IPR009027 (Ribosomal protein L9/RNase H1, N-terminal)	GO:0016020, GO:0016021	0.764922	0.801375	Turquoise
TRINITY_DN3400_c0_g3	5.59677	0.00139698	-0.0177433	1	NA	NA	NA	NA	NA	0.947336	0.956751	Turquoise
TRINITY_DN3400_c0_g1	1.04234	1	0.0384097	1	AT5G07900.1	***	Mitochondrial transcription termination factor family protein	IPR003690 (Transcription termination factor, mitochondrial/chloroplastic)	NA	0.879888	0.864755	Turquoise
TRINITY_DN340_c0_g1	-0.55061	1	0.0705839	1	NA	NA	NA	NA	NA	-0.890688	-0.879128	Turquoise
TRINITY_DN33931_c0_g1	1.8681	1	-0.117377	1	NA	NA	Unknown protein	NA	NA	0.809992	0.823365	Turquoise
TRINITY_DN33924_c0_g4	2.80987	1	-0.404655	1	tr|A0A453QW51|A0A453QW51_AEGTS	*-*	CCHC-type domain-containing protein	IPR001878 (Zinc finger, CCHC-type)	NA	0.846553	0.859184	Turquoise
TRINITY_DN33873_c0_g1	2.64819	0.202489	-2.6879	1	tr|A0A453MLB0|A0A453MLB0_AEGTS	***	GGACT domain-containing protein	IPR013024 (Gamma-glutamyl cyclotransferase-like)	NA	0.885734	0.876643	Turquoise
TRINITY_DN33871_c0_g2	2.43213	1	-3.89703	0.882185	NA	NA	NA	NA	NA	0.869888	0.864963	Turquoise
TRINITY_DN3385_c0_g1	1.75074	1	-0.103093	1	tr|A0A0A9P0N6|A0A0A9P0N6_ARUDO	*-*	XH domain-containing protein	NA	NA	0.861033	0.87503	Turquoise
TRINITY_DN33696_c0_g1	8.05432	2.06e-09	0	1	NA	NA	NA	NA	NA	0.956467	0.959383	Turquoise
TRINITY_DN33694_c0_g1	0.889961	1	-0.519664	1	tr|A0A0E0K6S7|A0A0E0K6S7_ORYPU	*-*	Cytochrome c domain-containing protein	IPR009056 (Cytochrome c-like domain)	GO:0009055, GO:0020037, GO:0022900, GO:0046872	0.799963	0.815364	Turquoise
TRINITY_DN336_c7_g2	2.96747	0.652569	-3.91488	0.84452	NA	NA	NA	NA	NA	0.834785	0.819506	Turquoise
TRINITY_DN336_c4_g2	6.78166	5.59e-07	-2.33887	1	NA	NA	Unknown protein	NA	NA	0.818939	0.830259	Turquoise
TRINITY_DN336_c3_g2	1.86834	0.569591	0.158226	1	NA	NA	NA	NA	NA	0.927434	0.924895	Turquoise
TRINITY_DN33569_c0_g1	7.55127	5.55e-08	0	1	NA	NA	NA	NA	NA	0.968797	0.967603	Turquoise
TRINITY_DN33537_c0_g2	-2.14132	0.347313	-0.180544	1	tr|A0A3B6D539|A0A3B6D539_WHEAT	***	DUF4220 domain-containing protein	IPR007658 (Protein of unknown function DUF594), IPR025315 (Domain of unknown function DUF4220)	NA	-0.811163	-0.817676	Turquoise
TRINITY_DN33532_c0_g1	2.10962	0.664348	0.443313	1	NA	NA	NA	NA	NA	0.789904	0.807247	Turquoise
TRINITY_DN3352_c0_g1	0.55925	1	-0.301526	1	tr|B4G0W3|B4G0W3_MAIZE	***	PLAC8 family protein	IPR006461 (PLAC8 motif-containing protein)	GO:0009975, GO:0016020, GO:0016021, GO:0051762	0.825224	0.810372	Turquoise
TRINITY_DN33511_c0_g1	2.12701	0.0176231	0.831403	1	NA	NA	NA	NA	NA	0.937507	0.937937	Turquoise
TRINITY_DN33313_c1_g1	1.88105	0.772868	-1.19464	1	NA	NA	NA	NA	NA	0.868748	0.851452	Turquoise
TRINITY_DN33264_c0_g2	0.875531	1	-1.47862	1	NA	NA	NA	NA	NA	0.807488	0.808814	Turquoise
TRINITY_DN33218_c0_g1	0.917449	1	-0.31499	1	NA	NA	NA	NA	NA	0.839635	0.841964	Turquoise
TRINITY_DN33201_c0_g1	5.45094	1.74e-07	4.28255	0.00137415	NA	NA	NA	NA	NA	0.827624	0.845805	Turquoise
TRINITY_DN3320_c1_g1	2.70473	0.298471	-1.55668	1	NA	NA	Unknown protein	NA	NA	0.907681	0.9083	Turquoise
TRINITY_DN3319_c0_g1	0.31832	1	0.00547786	1	sp|P80470|PSBY_SPIOL	***	Photosystem II core complex proteins psbY, chloroplastic	IPR009388 (Photosystem II PsbY)	GO:0009507, GO:0009523, GO:0009535, GO:0009536, GO:0009579, GO:0015979, GO:0016020, GO:0016021, GO:0030145	0.836766	0.837983	Turquoise
TRINITY_DN33188_c0_g1	5.91098	0.0159569	2.5994	1	NA	NA	NA	NA	NA	0.815748	0.81978	Turquoise
TRINITY_DN3318_c0_g4	5.31388	0.00584138	2.98152	1	NA	NA	Unknown protein	NA	NA	0.887877	0.897409	Turquoise
TRINITY_DN33169_c0_g1	8.59131	1.66e-09	0	1	tr|Q6K8U3|Q6K8U3_ORYSJ	*-*	Leucine-rich repeat-like protein	NA	NA	0.85621	0.840223	Turquoise
TRINITY_DN33113_c0_g1	1.48365	1	-1.69326	1	AT3G61780.1	*-*	embryo defective 1703	NA	NA	0.876261	0.857318	Turquoise
TRINITY_DN32966_c0_g1	2.99425	0.000243328	0.752579	1	NA	NA	NA	NA	NA	0.933962	0.940286	Turquoise
TRINITY_DN32919_c0_g3	2.1837	0.0954102	-0.113407	1	NA	NA	NA	NA	NA	0.959067	0.953307	Turquoise
TRINITY_DN32919_c0_g1	4.27323	0.0016915	2.23134	1	NA	NA	Unknown protein	NA	NA	0.868801	0.883409	Turquoise
TRINITY_DN32912_c0_g2	2.29262	0.896491	-0.832785	1	NA	NA	NA	NA	NA	0.862202	0.880686	Turquoise
TRINITY_DN32906_c0_g1	11.3335	0.000444403	6.62793	0.375278	NA	NA	NA	NA	NA	0.857727	0.833699	Turquoise
TRINITY_DN3288_c0_g1	1.60829	0.82277	0.135813	1	tr|A0A199V7J8|A0A199V7J8_ANACO	***	Calmodulin	IPR011992 (EF-hand domain pair)	GO:0005509	0.832387	0.832018	Turquoise
TRINITY_DN3287_c1_g2	2.96306	NA	-0.709299	NA	tr|A0A446LJF8|A0A446LJF8_TRITD	***	Skp1 domain-containing protein	NA	NA	0.959915	0.960619	Turquoise
TRINITY_DN3287_c1_g1	0.755606	1	0.152137	1	tr|A0A452Y3X2|A0A452Y3X2_AEGTS	***	DUF1421 domain-containing protein	IPR010820 (Protein of unknown function DUF1421)	NA	0.79857	0.806053	Turquoise
TRINITY_DN3286_c1_g3	5.10109	4.32e-13	3.10601	0.00448129	NA	NA	Unknown protein	NA	NA	0.965878	0.973362	Turquoise
TRINITY_DN3286_c1_g2	5.00389	0.00414927	3.78576	0.243891	NA	NA	Unknown protein	NA	NA	0.868713	0.878608	Turquoise
TRINITY_DN32776_c1_g1	2.61639	0.140053	0.399075	1	NA	NA	NA	NA	NA	0.868012	0.858774	Turquoise
TRINITY_DN32767_c0_g1	3.5884	0.0555911	1.43857	1	NA	NA	Unknown protein	NA	NA	0.840137	0.833119	Turquoise
TRINITY_DN32746_c0_g2	1.91487	1	-0.200463	1	tr|A0A446L919|A0A446L919_TRITD	***	BED-type domain-containing protein	IPR003656 (Zinc finger, BED-type), IPR012337 (Ribonuclease H-like domain), IPR025525 (hAT-like transposase, RNase-H fold)	NA	0.804698	0.801187	Turquoise
TRINITY_DN32666_c0_g2	3.49513	0.18299	-2.39851	1	tr|A0A446UWE2|A0A446UWE2_TRITD	***	F-box domain-containing protein	NA	NA	0.873931	0.866985	Turquoise
TRINITY_DN32600_c0_g3	3.46663	0.00448198	1.0163	1	NA	NA	Unknown protein	NA	NA	0.928963	0.941028	Turquoise
TRINITY_DN32554_c0_g1	0.77629	1	-0.310981	1	NA	NA	NA	NA	NA	0.786942	0.802693	Turquoise
TRINITY_DN325_c1_g1	2.29485	0.283389	0.547948	1	NA	NA	NA	NA	NA	0.89698	0.904724	Turquoise
TRINITY_DN325_c0_g1	10.4624	1.1e-05	8.4614	0.00403187	tr|A0A0E0JD12|A0A0E0JD12_ORYPU	*-*	CBFD_NFYB_HMF domain-containing protein	NA	GO:0005634, GO:0046982	0.877074	0.869884	Turquoise
TRINITY_DN32498_c0_g1	7.45738	5.67e-05	3.98914	0.536893	NA	NA	Unknown protein	NA	NA	0.91095	0.925368	Turquoise
TRINITY_DN32449_c1_g1	0.462471	1	-0.114183	1	NA	NA	NA	NA	NA	0.872311	0.865056	Turquoise
TRINITY_DN32449_c0_g1	7.47198	6.26e-08	2.11416	1	tr|A0A453APD9|A0A453APD9_AEGTS	*-*	CCHC-type domain-containing protein	IPR001878 (Zinc finger, CCHC-type)	NA	0.960833	0.956808	Turquoise
TRINITY_DN32442_c0_g3	-3.26518	0.0531921	0.0979664	1	tr|A0A2G2V4T9|A0A2G2V4T9_CAPBA	*-*	DNA mismatch repair protein MSH1, mitochondrial	NA	NA	-0.856129	-0.858167	Turquoise
TRINITY_DN32419_c0_g1	3.25331	0.00490288	1.16965	1	NA	NA	Unknown protein	NA	NA	0.89952	0.896119	Turquoise
TRINITY_DN32406_c0_g1	8.74563	1.3e-11	2.14296	1	NA	NA	NA	NA	NA	0.972036	0.968748	Turquoise
TRINITY_DN324_c0_g2	1.44521	0.612438	-0.358544	1	tr|A0A2K3NAK8|A0A2K3NAK8_TRIPR	***	Ty3/gypsy retrotransposon protein	IPR012337 (Ribonuclease H-like domain), IPR016197 (Chromo domain-like)	GO:0003676, GO:0015074	0.943734	0.93858	Turquoise
TRINITY_DN32296_c0_g1	2.74034	0.182418	1.06018	1	NA	NA	NA	NA	NA	0.89918	0.885598	Turquoise
TRINITY_DN3229_c0_g1	-0.340042	1	0.00327708	1	tr|A0A446NPZ0|A0A446NPZ0_TRITD	***	AAA domain-containing protein	IPR000157 (Toll/interleukin-1 receptor homology (TIR) domain), IPR002182 (NB-ARC), IPR027417 (P-loop containing nucleoside triphosphate hydrolase)	NA	-0.824386	-0.825558	Turquoise
TRINITY_DN32285_c0_g1	0.575412	1	-0.0259582	1	tr|A0A2R6RMB6|A0A2R6RMB6_ACTCC	***	Subtilisin-like protease	NA	GO:0006508, GO:0008233, GO:0016020, GO:0016021	0.855386	0.861033	Turquoise
TRINITY_DN32241_c0_g1	1.35161	1	-0.321352	1	tr|M8AUG3|M8AUG3_AEGTA	*-*	Subtilisin-like protease	IPR000209 (Peptidase S8/S53 domain)	GO:0004252, GO:0006508, GO:0008233, GO:0008236, GO:0016020, GO:0016021, GO:0016787	0.821022	0.805166	Turquoise
TRINITY_DN3221_c0_g1	3.01997	0.0194681	-8.06844	3.48e-26	tr|Q9SSZ0|Q9SSZ0_TRIRP	***	DA-3	NA	NA	0.943297	0.943915	Turquoise
TRINITY_DN3217_c3_g1	-1.81973	0.0845874	0.190877	1	NA	NA	NA	NA	NA	-0.873184	-0.864163	Turquoise
TRINITY_DN3217_c2_g1	2.27014	0.00282386	1.203	1	NA	NA	NA	NA	NA	0.889917	0.909553	Turquoise
TRINITY_DN32166_c0_g1	9.33228	4.39e-14	0	1	NA	NA	NA	NA	NA	0.932966	0.91772	Turquoise
TRINITY_DN3216_c1_g1	0.793608	1	-0.0744004	1	tr|A0A3B5Y7A2|A0A3B5Y7A2_WHEAT	***	zf-LSD1 domain-containing protein	IPR029030 (Caspase-like domain)	NA	0.810451	0.824856	Turquoise
TRINITY_DN32151_c0_g1	6.27291	0.000801542	3.97759	0.426126	NA	NA	NA	NA	NA	0.84719	0.835607	Turquoise
TRINITY_DN3215_c0_g2	0.740994	1	-0.424838	1	NA	NA	NA	NA	NA	0.838466	0.844192	Turquoise
TRINITY_DN32141_c2_g1	3.77823	0.00754686	0.896487	1	NA	NA	NA	NA	NA	0.908595	0.896116	Turquoise
TRINITY_DN32118_c0_g1	3.52675	0.131929	1.64363	1	NA	NA	NA	NA	NA	0.805917	0.80089	Turquoise
TRINITY_DN3209_c0_g1	-0.764967	1	0.0155845	1	tr|A0A0D9V8X7|A0A0D9V8X7_9ORYZ	***	Rhomboid domain-containing protein	IPR022764 (Peptidase S54, rhomboid domain)	GO:0004252, GO:0006508, GO:0016020, GO:0016021	-0.867316	-0.868801	Turquoise
TRINITY_DN32067_c0_g1	1.48323	1	0.0613918	1	NA	NA	NA	NA	NA	0.825626	0.803141	Turquoise
TRINITY_DN32054_c0_g1	7.45001	1.8e-06	4.23778	0.182864	tr|A0A3B6TUB3|A0A3B6TUB3_WHEAT	*-*	Peroxidase	IPR010255 (Haem peroxidase)	NA	0.876415	0.882969	Turquoise
TRINITY_DN32035_c0_g1	7.4982	1.25e-07	0.539012	1	NA	NA	NA	NA	NA	0.941644	0.934939	Turquoise
TRINITY_DN32015_c0_g1	2.68494	0.671782	-1.02637	1	NA	NA	NA	NA	NA	0.946986	0.940788	Turquoise
TRINITY_DN32_c1_g1	1.55789	1	-2.07807	1	NA	NA	NA	NA	NA	0.846291	0.843328	Turquoise
TRINITY_DN31961_c0_g1	1.75964	0.830257	-1.69982	1	NA	NA	Unknown protein	NA	NA	0.903408	0.901351	Turquoise
TRINITY_DN31925_c0_g1	1.18774	1	-0.476256	1	tr|B9G544|B9G544_ORYSJ	*-*	DUF223 domain-containing protein	IPR012340 (Nucleic acid-binding, OB-fold)	NA	0.787796	0.801067	Turquoise
TRINITY_DN31909_c0_g1	4.71898	0.0155365	1.80641	1	tr|C5XWF0|C5XWF0_SORBI	*-*	Protein kinase domain-containing protein	NA	GO:0004672, GO:0005524, GO:0006468	0.89476	0.887842	Turquoise
TRINITY_DN31906_c0_g1	5.93794	0.00234867	-0.628211	1	NA	NA	NA	NA	NA	0.833121	0.816563	Turquoise
TRINITY_DN3186_c0_g2	2.34778	0.59462	-0.150714	1	NA	NA	Unknown protein	NA	NA	0.948153	0.951195	Turquoise
TRINITY_DN31777_c0_g1	3.33553	0.0436881	1.26987	1	NA	NA	NA	NA	NA	0.822288	0.830015	Turquoise
TRINITY_DN31748_c0_g1	-7.37483	2.82e-08	0.0630936	1	NA	NA	NA	NA	NA	-0.894979	-0.886591	Turquoise
TRINITY_DN31724_c1_g1	1.87603	0.812408	-1.57746	1	tr|A0A4U6UDJ6|A0A4U6UDJ6_SETVI	***	Receptor-like serine/threonine-protein kinase	IPR011009 (Protein kinase-like domain), IPR013320 (Concanavalin A-like lectin/glucanase domain)	NA	0.853019	0.858848	Turquoise
TRINITY_DN3167_c0_g2	-0.644966	1	-0.129922	1	NA	NA	NA	NA	NA	-0.796375	-0.820733	Turquoise
TRINITY_DN31669_c0_g1	1.71273	1	-0.261023	1	NA	NA	NA	NA	NA	0.827045	0.831417	Turquoise
TRINITY_DN31610_c2_g1	7.25165	7.15e-06	2.6859	1	NA	NA	NA	NA	NA	0.839946	0.837454	Turquoise
TRINITY_DN31585_c0_g1	3.08615	2.08e-05	1.06913	1	tr|A0A2G3BZQ4|A0A2G3BZQ4_CAPCH	*-*	Senescence-specific cysteine protease SAG39	NA	GO:0006508, GO:0008233, GO:0008234	0.968422	0.97235	Turquoise
TRINITY_DN31552_c0_g2	6.93248	3.15e-06	0	1	NA	NA	NA	NA	NA	0.972156	0.960613	Turquoise
TRINITY_DN31530_c0_g1	2.77151	0.352362	0.402911	1	NA	NA	NA	NA	NA	0.872414	0.879675	Turquoise
TRINITY_DN31477_c0_g1	-3.8047	0.000519002	0.0129766	1	NA	NA	NA	NA	NA	-0.866023	-0.862955	Turquoise
TRINITY_DN31469_c0_g1	2.63538	0.248776	-2.69941	0.92316	NA	NA	Unknown protein	NA	NA	0.869957	0.862469	Turquoise
TRINITY_DN31447_c0_g1	4.23622	0.0570971	2.55397	1	NA	NA	Unknown protein	NA	NA	0.815548	0.81626	Turquoise
TRINITY_DN31445_c0_g1	6.97936	8.58e-06	0	1	NA	NA	NA	NA	NA	0.924148	0.928139	Turquoise
TRINITY_DN31443_c0_g1	2.58726	0.285693	-0.163245	1	NA	NA	Unknown protein	NA	NA	0.894114	0.894056	Turquoise
TRINITY_DN31409_c1_g2	1.87751	0.878521	-0.643554	1	NA	NA	NA	NA	NA	0.818707	0.811686	Turquoise
TRINITY_DN31401_c0_g1	3.98973	0.00211399	1.95571	1	tr|A0A453JCH4|A0A453JCH4_AEGTS	***	Protein DETOXIFICATION	IPR002528 (Multi antimicrobial extrusion protein)	NA	0.848101	0.85571	Turquoise
TRINITY_DN31387_c0_g5	2.74988	0.118251	-0.309973	1	tr|I1HFQ6|I1HFQ6_BRADI	*-*	UDP-glucose 4-epimerase	IPR016040 (NAD(P)-binding domain)	GO:0003978, GO:0006012, GO:0016853	0.963832	0.951591	Turquoise
TRINITY_DN31370_c0_g1	7.21798	1.29e-06	0	1	NA	NA	Unknown protein	NA	NA	0.921825	0.930014	Turquoise
TRINITY_DN31320_c0_g1	3.00356	1	-0.433812	1	AT5G42080.3	*-*	dynamin-like protein	IPR000375 (Dynamin central domain), IPR001401 (Dynamin, GTPase domain), IPR022812 (Dynamin superfamily), IPR027417 (P-loop containing nucleoside triphosphate hydrolase)	NA	0.919264	0.927274	Turquoise
TRINITY_DN31277_c0_g1	4.75612	0.0219585	-0.289319	1	NA	NA	Unknown protein	NA	NA	0.938974	0.930136	Turquoise
TRINITY_DN31264_c0_g1	3.92889	0.00271011	1.80115	1	NA	NA	NA	NA	NA	0.948134	0.955315	Turquoise
TRINITY_DN31221_c0_g1	2.38655	0.438669	0.445846	1	tr|A0A287F448|A0A287F448_HORVV	***	Cauli_VI domain-containing protein	IPR009027 (Ribosomal protein L9/RNase H1, N-terminal)	GO:0016020, GO:0016021	0.813787	0.800441	Turquoise
TRINITY_DN31036_c0_g1	7.97207	2.05e-08	0	1	NA	NA	NA	NA	NA	0.868095	0.867721	Turquoise
TRINITY_DN30968_c0_g1	2.93306	0.632777	-2.99453	1	NA	NA	NA	NA	NA	0.886578	0.879551	Turquoise
TRINITY_DN30880_c0_g1	1.77115	0.73448	-0.627095	1	NA	NA	NA	NA	NA	0.825762	0.846918	Turquoise
TRINITY_DN30818_c0_g1	-1.85157	0.101285	-0.444582	1	NA	NA	NA	NA	NA	-0.817926	-0.830692	Turquoise
TRINITY_DN30773_c0_g1	1.40973	1	0.0148313	1	NA	NA	NA	NA	NA	0.809303	0.802791	Turquoise
TRINITY_DN30660_c0_g1	2.16732	0.188802	0.642826	1	tr|A0A173GPJ4|A0A173GPJ4_9ASPA	***	Glutathione S-transferase	IPR010987 (Glutathione S-transferase, C-terminal-like), IPR012336 (Thioredoxin-like fold)	GO:0016740	0.923792	0.928752	Turquoise
TRINITY_DN30650_c0_g2	-7.84439	1.85e-09	-0.937728	1	tr|A0A0D3GFD3|A0A0D3GFD3_9ORYZ	*-*	4-hydroxy-4-methyl-2-oxoglutarate aldolase	IPR005493 (Ribonuclease E inhibitor RraA/RraA-like protein)	GO:0008428, GO:0008948, GO:0016829, GO:0043086, GO:0046872, GO:0047443, GO:0051252	-0.792494	-0.812491	Turquoise
TRINITY_DN30593_c0_g1	2.43043	0.471008	0.460339	1	NA	NA	Unknown protein	NA	NA	0.877237	0.887211	Turquoise
TRINITY_DN30589_c0_g1	4.15053	0.00507206	2.40463	1	NA	NA	NA	NA	NA	0.906317	0.910675	Turquoise
TRINITY_DN30578_c0_g1	1.99001	0.525009	0.752862	1	NA	NA	NA	NA	NA	0.831889	0.829623	Turquoise
TRINITY_DN30539_c0_g2	1.57606	0.733812	-0.738139	1	NA	NA	Unknown protein	NA	NA	0.877288	0.873757	Turquoise
TRINITY_DN3053_c3_g1	-7.58466	8.9e-08	0.0834834	1	NA	NA	Unknown protein	NA	NA	-0.795011	-0.801122	Turquoise
TRINITY_DN30510_c0_g2	2.25578	0.14737	-0.141982	1	NA	NA	Unknown protein	NA	NA	0.865501	0.850191	Turquoise
TRINITY_DN30499_c0_g1	2.35628	0.620792	-3.36731	0.38038	NA	NA	NA	NA	NA	0.924637	0.904305	Turquoise
TRINITY_DN30477_c0_g1	0.526155	1	-0.223567	1	tr|A0A1E5WBB3|A0A1E5WBB3_9POAL	***	Pentatricopeptide repeat-containing protein	IPR002885 (Pentatricopeptide repeat)	NA	0.800235	0.810993	Turquoise
TRINITY_DN30413_c0_g1	-4.57617	0.0142877	0.462889	1	tr|A0A446J1P0|A0A446J1P0_TRITD	*-*	G domain-containing protein	IPR013785 (Aldolase-type TIM barrel)	NA	-0.816934	-0.812757	Turquoise
TRINITY_DN304_c0_g1	1.19879	1	0.0748994	1	tr|A0A199W0Z7|A0A199W0Z7_ANACO	***	Pre-mRNA-splicing factor 38B	IPR005037 (Pre-mRNA-splicing factor 38)	NA	0.808734	0.82528	Turquoise
TRINITY_DN30378_c0_g2	6.75881	2.98e-05	0	1	NA	NA	Unknown protein	NA	NA	0.896028	0.910337	Turquoise
TRINITY_DN30368_c0_g1	2.11559	1	-1.11565	1	NA	NA	NA	NA	NA	0.824749	0.848924	Turquoise
TRINITY_DN30357_c0_g1	2.22241	0.16739	0.156316	1	NA	NA	NA	NA	NA	0.841163	0.850725	Turquoise
TRINITY_DN30346_c1_g2	9.36898	0.000432659	5.31128	0.47238	tr|A0A287QA78|A0A287QA78_HORVV	*-*	Eukaryotic translation initiation factor 3 subunit B	NA	GO:0001732, GO:0002183, GO:0003723, GO:0003743, GO:0005737, GO:0005852, GO:0006412, GO:0006413, GO:0016282, GO:0031369, GO:0033290	0.931666	0.916724	Turquoise
TRINITY_DN30306_c3_g1	1.66499	1	-6.5549	0.0232556	tr|A0A446IKD0|A0A446IKD0_TRITD	*-*	PlsC domain-containing protein	NA	NA	0.850339	0.846516	Turquoise
TRINITY_DN30301_c1_g1	3.49539	0.0370736	1.38657	1	NA	NA	NA	NA	NA	0.901171	0.9135	Turquoise
TRINITY_DN30301_c0_g1	-4.1884	9.31e-05	-0.172395	1	NA	NA	NA	NA	NA	-0.907833	-0.910463	Turquoise
TRINITY_DN3028_c0_g2	2.86077	0.478321	0.904647	1	NA	NA	Unknown protein	NA	NA	0.910325	0.911276	Turquoise
TRINITY_DN3025_c1_g2	6.82265	6.69e-06	0	1	NA	NA	NA	NA	NA	0.970333	0.963638	Turquoise
TRINITY_DN30237_c0_g1	3.34802	0.0994673	-1.52597	1	NA	NA	NA	NA	NA	0.892511	0.87771	Turquoise
TRINITY_DN30222_c0_g1	7.95996	4.05e-06	5.79843	0.0163038	tr|A0A287E1Z7|A0A287E1Z7_HORVV	***	NB-ARC domain-containing protein	IPR002182 (NB-ARC), IPR027417 (P-loop containing nucleoside triphosphate hydrolase)	GO:0043531	0.874992	0.874276	Turquoise
TRINITY_DN30176_c0_g1	2.09338	1	-0.501637	1	tr|N1R489|N1R489_AEGTA	*-*	Disease resistance protein RPM1	NA	GO:0043531	0.862462	0.877378	Turquoise
TRINITY_DN30175_c0_g1	5.35266	0.00459712	-0.583177	1	tr|A1YKE8|A1YKE8_BRASY	*-*	Polygalacturonase inhibitor	IPR032675 (Leucine-rich repeat domain, L domain-like)	NA	0.946139	0.939654	Turquoise
TRINITY_DN30167_c0_g1	3.04264	0.511346	0.271117	1	NA	NA	Unknown protein	NA	NA	0.87472	0.8752	Turquoise
TRINITY_DN30143_c0_g1	2.61021	0.263514	0.16635	1	tr|A0A317YK48|A0A317YK48_MAIZE	***	Protein DGS1, mitochondrial	IPR013946 (Nuclear control of ATP synthase 2)	NA	0.886141	0.88289	Turquoise
TRINITY_DN30022_c1_g1	6.46976	0.00139859	3.75575	0.673818	NA	NA	Unknown protein	NA	NA	0.864767	0.886617	Turquoise
TRINITY_DN3000_c0_g1	-2.1532	0.000986386	0.15595	1	NA	NA	Unknown protein	NA	NA	-0.825387	-0.81168	Turquoise
TRINITY_DN30_c1_g1	1.38705	0.567829	-0.777004	1	NA	NA	Unknown protein	NA	NA	0.948958	0.938129	Turquoise
TRINITY_DN29992_c0_g1	3.85399	0.0151446	1.70929	1	NA	NA	NA	NA	NA	0.944233	0.953876	Turquoise
TRINITY_DN29980_c0_g1	1.74814	0.998816	-1.51802	1	NA	NA	NA	NA	NA	0.852814	0.836132	Turquoise
TRINITY_DN2996_c0_g1	-6.70472	1.39e-07	-0.0262955	1	NA	NA	Unknown protein	NA	NA	-0.855692	-0.856193	Turquoise
TRINITY_DN29950_c0_g1	1.12605	1	0.104319	1	tr|A0A1D6KE00|A0A1D6KE00_MAIZE	*-*	Thaumatin-like protein	IPR001938 (Thaumatin)	GO:0005634, GO:0006606, GO:0006607, GO:0006610, GO:0006886, GO:0006913, GO:0008139, GO:0008536, GO:0008565, GO:0031965, GO:0034399	0.838079	0.827128	Turquoise
TRINITY_DN29915_c0_g1	4.02845	0.402515	-1.5077	1	NA	NA	NA	NA	NA	0.915098	0.929155	Turquoise
TRINITY_DN29907_c0_g1	8.94388	3.83e-12	0	1	NA	NA	Unknown protein	NA	NA	0.908635	0.908613	Turquoise
TRINITY_DN29801_c1_g1	3.44277	0.0936286	1.23258	1	NA	NA	NA	NA	NA	0.930339	0.93435	Turquoise
TRINITY_DN29770_c0_g1	2.42279	0.00150066	0.428678	1	NA	NA	NA	NA	NA	0.943457	0.953131	Turquoise
TRINITY_DN29710_c0_g1	1.41888	0.846304	0.106476	1	tr|A0A446WKK2|A0A446WKK2_TRITD	*-*	Trehalose 6-phosphate phosphatase	IPR003337 (Trehalose-phosphatase), IPR023214 (HAD-like domain)	NA	0.913936	0.897472	Turquoise
TRINITY_DN29614_c0_g2	4.80607	0.00434973	-2.18547	1	NA	NA	Unknown protein	NA	NA	0.867275	0.855758	Turquoise
TRINITY_DN29594_c0_g1	3.24529	0.200964	0.546037	1	NA	NA	NA	NA	NA	0.855407	0.860257	Turquoise
TRINITY_DN29586_c0_g1	1.2013	1	-1.70431	1	NA	NA	NA	NA	NA	0.844585	0.826841	Turquoise
TRINITY_DN2955_c0_g1	1.21823	1	-0.22679	1	tr|B8BBX0|B8BBX0_ORYSI	***	Reverse transcriptase domain-containing protein	IPR000477 (Reverse transcriptase domain), IPR012337 (Ribonuclease H-like domain), IPR026960 (Reverse transcriptase zinc-binding domain)	GO:0003676, GO:0004523, GO:0090502	0.841947	0.847538	Turquoise
TRINITY_DN29543_c0_g1	-1.05814	1	-0.0823651	1	tr|B9S2E7|B9S2E7_RICCO	***	Glutathione s-transferase, putative	IPR010987 (Glutathione S-transferase, C-terminal-like), IPR012336 (Thioredoxin-like fold)	GO:0004462, GO:0016740, GO:0016829	-0.891821	-0.88333	Turquoise
TRINITY_DN29513_c0_g1	6.15289	0.000155703	2.54235	1	NA	NA	NA	NA	NA	0.87241	0.882974	Turquoise
TRINITY_DN29457_c0_g2	4.13608	0.288773	2.25507	1	NA	NA	NA	NA	NA	0.802736	0.830012	Turquoise
TRINITY_DN29450_c0_g1	-6.36769	1.28e-05	-0.446638	1	NA	NA	NA	NA	NA	-0.842426	-0.842708	Turquoise
TRINITY_DN2945_c0_g2	1.5654	1	-2.26142	1	NA	NA	NA	NA	NA	0.853795	0.857306	Turquoise
TRINITY_DN29289_c0_g2	2.71808	0.531785	1.06399	1	tr|A0A0Q3GRN8|A0A0Q3GRN8_BRADI	*-*	ULP_PROTEASE domain-containing protein	NA	GO:0006508, GO:0008234	0.878938	0.881227	Turquoise
TRINITY_DN29289_c0_g1	1.84494	0.830805	-0.260104	1	NA	NA	Unknown protein	NA	NA	0.843836	0.852715	Turquoise
TRINITY_DN29231_c0_g1	2.60679	0.00421564	-0.681119	1	tr|A0A3L6S241|A0A3L6S241_PANMI	*-*	Pollen-specific protein SF21-like	IPR004142 (NDRG), IPR029058 (Alpha/Beta hydrolase fold)	NA	0.912765	0.897047	Turquoise
TRINITY_DN29147_c0_g2	4.71056	0.0412713	1.56085	1	NA	NA	NA	NA	NA	0.815144	0.807073	Turquoise
TRINITY_DN2914_c1_g1	0.741399	1	-0.010328	1	tr|A0A1D6EFI0|A0A1D6EFI0_MAIZE	***	AAR2 protein family	IPR007946 (A1 cistron-splicing factor, AAR2)	NA	0.846998	0.831837	Turquoise
TRINITY_DN2914_c0_g2	1.5317	1	-1.06395	1	NA	NA	NA	NA	NA	0.880628	0.873923	Turquoise
TRINITY_DN29078_c0_g1	0.222616	1	-0.113253	1	tr|I1I1D0|I1I1D0_BRADI	***	NADH dehydrogenase [ubiquinone] iron-sulfur protein 6, mitochondrial	IPR016668 (NADH dehydrogenase [ubiquinone] (complex I), iron-sulphur protein 6, mitochondria)	GO:0005739, GO:0005743, GO:0005747, GO:0006120, GO:0016020, GO:0055114, GO:0070469	0.81174	0.803159	Turquoise
TRINITY_DN2905_c0_g1	1.12185	1	0.275405	1	tr|A0A1D6G2M2|A0A1D6G2M2_MAIZE	*-*	Retrovirus-related Pol polyprotein LINE-1	NA	NA	0.869704	0.877688	Turquoise
TRINITY_DN28998_c0_g1	1.14922	1	-0.511799	1	NA	NA	NA	NA	NA	0.870459	0.87612	Turquoise
TRINITY_DN28962_c0_g3	3.80991	0.00119866	-0.355657	1	NA	NA	Unknown protein	NA	NA	0.897923	0.880461	Turquoise
TRINITY_DN28877_c0_g1	4.62678	0.00336155	0.994861	1	tr|A0A446JSE3|A0A446JSE3_TRITD	***	BED-type domain-containing protein	IPR003656 (Zinc finger, BED-type), IPR012337 (Ribonuclease H-like domain)	NA	0.95427	0.966935	Turquoise
TRINITY_DN28862_c1_g1	6.19761	0.0071127	3.85468	0.772961	NA	NA	NA	NA	NA	0.803592	0.82638	Turquoise
TRINITY_DN28834_c0_g1	2.24509	1	-4.5414	0.369948	tr|A0A446YYP9|A0A446YYP9_TRITD	*-*	FAD-binding PCMH-type domain-containing protein	IPR016166 (FAD-binding, type 2)	NA	0.795718	0.807403	Turquoise
TRINITY_DN2880_c0_g1	0.509882	1	-0.169294	1	AT2G32640.1	***	Lycopene beta/epsilon cyclase protein	IPR023753 (FAD/NAD(P)-binding domain)	NA	0.830322	0.830555	Turquoise
TRINITY_DN28745_c0_g1	2.72579	0.62346	0.404491	1	NA	NA	NA	NA	NA	0.826863	0.835303	Turquoise
TRINITY_DN28690_c0_g3	0.512037	1	-0.00891721	1	NA	NA	NA	NA	NA	0.842895	0.85024	Turquoise
TRINITY_DN28685_c0_g1	-5.6519	5.3e-10	-0.570767	1	NA	NA	NA	NA	NA	-0.810461	-0.825177	Turquoise
TRINITY_DN28683_c0_g3	2.83434	0.000564102	0.412881	1	NA	NA	NA	NA	NA	0.933946	0.936056	Turquoise
TRINITY_DN28649_c0_g1	6.04107	0.000796171	1.66904	1	NA	NA	Unknown protein	NA	NA	0.905005	0.885489	Turquoise
TRINITY_DN2859_c0_g4	2.3671	0.856695	1.0884	1	NA	NA	Unknown protein	NA	NA	0.79536	0.806973	Turquoise
TRINITY_DN2859_c0_g2	-2.0916	0.00616435	-0.108172	1	NA	NA	Unknown protein	NA	NA	-0.897788	-0.911569	Turquoise
TRINITY_DN28574_c0_g1	4.16309	0.0685273	1.07226	1	tr|Q2ACB9|Q2ACB9_MAIZE	*-*	Histidine kinase	NA	GO:0000155, GO:0000160, GO:0007165, GO:0016020, GO:0016021, GO:0016301, GO:0016310, GO:0016772, GO:0023014	0.880328	0.887238	Turquoise
TRINITY_DN2845_c0_g1	1.76485	1	-0.308631	1	NA	NA	NA	NA	NA	0.809371	0.817344	Turquoise
TRINITY_DN28433_c0_g1	2.64593	0.709447	-0.676871	1	NA	NA	NA	NA	NA	0.83219	0.827053	Turquoise
TRINITY_DN28337_c1_g1	2.10714	0.415616	-1.06841	1	NA	NA	NA	NA	NA	0.936915	0.941031	Turquoise
TRINITY_DN28333_c0_g1	1.55239	1	0.0820405	1	NA	NA	Unknown protein	NA	NA	0.835993	0.843033	Turquoise
TRINITY_DN28314_c0_g1	7.72255	2.94e-06	5.88175	0.00706573	NA	NA	NA	NA	NA	0.886586	0.891208	Turquoise
TRINITY_DN2831_c0_g1	-2.27222	2.51e-05	-0.457931	1	sp|Q0IWF3|NIP31_ORYSJ	***	Aquaporin NIP3-1	IPR000425 (Major intrinsic protein), IPR023271 (Aquaporin-like)	GO:0015267, GO:0016020, GO:0016021, GO:0055085	-0.862831	-0.8674	Turquoise
TRINITY_DN28225_c0_g2	4.05029	0.0225574	2.44171	1	NA	NA	NA	NA	NA	0.880426	0.894285	Turquoise
TRINITY_DN2821_c2_g1	3.80141	0.0200613	1.30392	1	NA	NA	NA	NA	NA	0.934672	0.926281	Turquoise
TRINITY_DN28208_c0_g2	6.98674	8.33e-05	3.19642	1	NA	NA	Unknown protein	NA	NA	0.795799	0.809939	Turquoise
TRINITY_DN28188_c0_g2	6.81789	0.000294401	3.72145	0.685364	NA	NA	NA	NA	NA	0.877369	0.866126	Turquoise
TRINITY_DN28162_c0_g1	0.893889	1	-0.59406	1	NA	NA	Unknown protein	NA	NA	0.898635	0.892612	Turquoise
TRINITY_DN2815_c0_g3	1.2006	1	-0.742597	1	NA	NA	NA	NA	NA	0.835953	0.83066	Turquoise
TRINITY_DN2813_c1_g1	4.70025	0.00845065	2.18742	1	NA	NA	NA	NA	NA	0.847088	0.850371	Turquoise
TRINITY_DN28122_c0_g1	6.3654	3.93e-05	4.5799	0.0649093	NA	NA	NA	NA	NA	0.866225	0.863712	Turquoise
TRINITY_DN28120_c0_g1	3.64784	2.35e-10	1.299	1	tr|A0A453PA94|A0A453PA94_AEGTS	***	Reverse transcriptase domain-containing protein	IPR000477 (Reverse transcriptase domain), IPR005135 (Endonuclease/exonuclease/phosphatase)	NA	0.949584	0.962183	Turquoise
TRINITY_DN28112_c0_g1	4.20079	0.00216082	2.25078	1	NA	NA	Unknown protein	NA	NA	0.875161	0.881734	Turquoise
TRINITY_DN28106_c0_g2	8.19016	5.98e-10	1.14582	1	NA	NA	Unknown protein	NA	NA	0.943026	0.944627	Turquoise
TRINITY_DN28066_c1_g1	6.11401	0.00200588	3.03014	1	NA	NA	NA	NA	NA	0.855264	0.875149	Turquoise
TRINITY_DN28051_c0_g1	4.79275	0.00262751	1.52168	1	NA	NA	NA	NA	NA	0.897922	0.894284	Turquoise
TRINITY_DN28040_c0_g1	3.47167	7.66e-05	0.90332	1	NA	NA	NA	NA	NA	0.952335	0.954672	Turquoise
TRINITY_DN28039_c0_g1	2.52024	0.0593498	0.748049	1	NA	NA	NA	NA	NA	0.920481	0.925855	Turquoise
TRINITY_DN28023_c0_g1	1.94398	1	-5.95046	0.0309334	NA	NA	NA	NA	NA	0.819981	0.834017	Turquoise
TRINITY_DN28017_c0_g1	1.24739	1	-0.972548	1	NA	NA	NA	NA	NA	0.841234	0.827092	Turquoise
TRINITY_DN27997_c0_g1	2.81051	0.763298	-3.21192	1	NA	NA	NA	NA	NA	0.837792	0.827267	Turquoise
TRINITY_DN27996_c0_g1	6.61853	2.79e-05	1.14725	1	NA	NA	NA	NA	NA	0.943231	0.94278	Turquoise
TRINITY_DN2798_c0_g1	4.29812	0.0607152	1.54124	1	tr|A0A453JHH9|A0A453JHH9_AEGTS	***	Reverse transcriptase domain-containing protein	IPR000477 (Reverse transcriptase domain), IPR005135 (Endonuclease/exonuclease/phosphatase), IPR026960 (Reverse transcriptase zinc-binding domain)	NA	0.829019	0.846701	Turquoise
TRINITY_DN27905_c0_g1	1.19059	1	0.427536	1	tr|A0A452XKN9|A0A452XKN9_AEGTS	***	DUF4220 domain-containing protein	IPR007658 (Protein of unknown function DUF594), IPR025315 (Domain of unknown function DUF4220)	NA	0.827567	0.821294	Turquoise
TRINITY_DN2786_c0_g1	1.40979	1	-0.314848	1	NA	NA	Unknown protein	NA	NA	0.91521	0.906931	Turquoise
TRINITY_DN27845_c0_g1	0.790966	1	0.113666	1	tr|A0A3B6QC75|A0A3B6QC75_WHEAT	***	F-box domain-containing protein	IPR001810 (F-box domain), IPR032675 (Leucine-rich repeat domain, L domain-like)	NA	0.858466	0.843507	Turquoise
TRINITY_DN27842_c0_g1	3.54337	0.0621963	1.0526	1	NA	NA	NA	NA	NA	0.859246	0.85532	Turquoise
TRINITY_DN2784_c1_g2	0.845238	1	0.0399116	1	sp|P06671|CB22_MAIZE	*-*	Chlorophyll a-b binding protein, chloroplastic	IPR022796 (Chlorophyll A-B binding protein), IPR023329 (Chlorophyll a/b binding protein domain)	GO:0009416, GO:0009507, GO:0009522, GO:0009523, GO:0009535, GO:0009536, GO:0009579, GO:0009765, GO:0009768, GO:0009941, GO:0010287, GO:0015979, GO:0016020, GO:0016021, GO:0016168, GO:0018298, GO:0046872	0.826847	0.817529	Turquoise
TRINITY_DN27778_c0_g1	3.51711	0.0175598	1.26654	1	NA	NA	NA	NA	NA	0.867699	0.872082	Turquoise
TRINITY_DN2777_c0_g1	3.32654	0.0326033	-2.52988	0.683096	tr|A0A1D6II93|A0A1D6II93_MAIZE	***	Interferon-related developmental regulator family protein / IFRD protein family	IPR016024 (Armadillo-type fold)	GO:0016020, GO:0016021	0.922143	0.933084	Turquoise
TRINITY_DN27766_c0_g3	7.56087	0.000163611	5.02926	0.169176	NA	NA	Unknown protein	NA	NA	0.881871	0.889456	Turquoise
TRINITY_DN27766_c0_g2	8.161	0.00224707	5.48786	0.327291	tr|I1R3N6|I1R3N6_ORYGL	***	F-box domain-containing protein	IPR001810 (F-box domain), IPR013187 (F-box associated domain, type 3)	NA	0.871687	0.857605	Turquoise
TRINITY_DN27755_c0_g1	8.64293	0.000438992	2.75304	1	tr|A0A3L6F051|A0A3L6F051_MAIZE	*-*	Rhamnogalacturonate lyase	IPR008979 (Galactose-binding domain-like)	NA	0.79443	0.825207	Turquoise
TRINITY_DN27743_c0_g1	2.01622	0.470258	-0.33733	1	tr|A0A0A9JPS0|A0A0A9JPS0_ARUDO	*-*	FAD-binding FR-type domain-containing protein	NA	GO:0016020, GO:0016021, GO:0016491, GO:0055114	0.937731	0.94903	Turquoise
TRINITY_DN27738_c0_g1	4.87709	0.0226424	1.68074	1	NA	NA	NA	NA	NA	0.824066	0.802264	Turquoise
TRINITY_DN27725_c0_g1	2.93216	0.896319	-0.501899	1	NA	NA	NA	NA	NA	0.908764	0.895311	Turquoise
TRINITY_DN27681_c1_g3	5.86673	5.78e-05	-1.73804	1	NA	NA	NA	NA	NA	0.946368	0.945303	Turquoise
TRINITY_DN27646_c0_g2	-8.56924	8.01e-12	0.509824	1	tr|A0A446MZE7|A0A446MZE7_TRITD	***	Protein kinase domain-containing protein	IPR011009 (Protein kinase-like domain)	NA	-0.837274	-0.824298	Turquoise
TRINITY_DN2762_c0_g2	3.03102	0.0552574	-0.0705743	1	NA	NA	Unknown protein	NA	NA	0.97474	0.973605	Turquoise
TRINITY_DN2761_c0_g2	2.51159	0.254998	0.919874	1	tr|R7W845|R7W845_AEGTA	*-*	PMR5N domain-containing protein	NA	NA	0.888781	0.890234	Turquoise
TRINITY_DN27586_c0_g1	2.13354	0.177162	0.0993267	1	NA	NA	NA	NA	NA	0.949787	0.942076	Turquoise
TRINITY_DN27577_c0_g1	0.883018	1	-1.35198	1	NA	NA	NA	NA	NA	0.819639	0.823035	Turquoise
TRINITY_DN27573_c0_g2	5.65435	0.00548085	3.30995	0.952526	NA	NA	Unknown protein	NA	NA	0.808386	0.832499	Turquoise
TRINITY_DN27565_c0_g1	6.22741	0.000287934	0	1	NA	NA	NA	NA	NA	0.955437	0.966456	Turquoise
TRINITY_DN27556_c0_g1	3.29814	0.000642493	-0.92604	1	tr|A0A287PSH3|A0A287PSH3_HORVV	***	Rep_fac-A_C domain-containing protein	IPR012340 (Nucleic acid-binding, OB-fold)	NA	0.951721	0.964258	Turquoise
TRINITY_DN27507_c0_g2	3.98994	0.0874138	1.72498	1	NA	NA	Unknown protein	NA	NA	0.919838	0.913875	Turquoise
TRINITY_DN27494_c0_g1	1.55028	1	-0.407967	1	NA	NA	NA	NA	NA	0.786771	0.811152	Turquoise
TRINITY_DN2749_c0_g2	7.66179	1.35e-07	5.47855	0.005339	NA	NA	NA	NA	NA	0.853766	0.875409	Turquoise
TRINITY_DN2747_c0_g1	0.537489	1	-0.0343106	1	NA	NA	NA	NA	NA	0.865488	0.875539	Turquoise
TRINITY_DN27442_c0_g1	3.2924	0.245206	-3.26368	1	NA	NA	NA	NA	NA	0.836189	0.821963	Turquoise
TRINITY_DN27435_c0_g1	4.38984	0.0893864	1.07166	1	NA	NA	Unknown protein	NA	NA	0.952297	0.944942	Turquoise
TRINITY_DN27432_c0_g1	2.17602	1	-4.33487	0.41193	NA	NA	NA	NA	NA	0.853271	0.835406	Turquoise
TRINITY_DN27417_c0_g2	2.45217	0.627775	-0.781565	1	NA	NA	NA	NA	NA	0.828723	0.816784	Turquoise
TRINITY_DN27408_c0_g1	4.34789	0.00437198	2.00046	1	NA	NA	Unknown protein	NA	NA	0.890544	0.890408	Turquoise
TRINITY_DN27394_c0_g2	-5.39941	1.51e-05	-0.175615	1	NA	NA	NA	NA	NA	-0.820617	-0.817275	Turquoise
TRINITY_DN27366_c0_g1	2.13152	1	-2.46995	1	tr|C7IXG0|C7IXG0_ORYSJ	*-*	ATP-dependent DNA helicase	IPR015425 (Formin, FH2 domain)	GO:0000166, GO:0000723, GO:0003678, GO:0004386, GO:0005524, GO:0006281, GO:0006310, GO:0006974, GO:0016787, GO:0032508	0.855679	0.852951	Turquoise
TRINITY_DN2732_c0_g1	1.24659	1	0.224118	1	NA	NA	Unknown protein	NA	NA	0.865468	0.870616	Turquoise
TRINITY_DN27312_c0_g1	0.902383	1	0.0469264	1	NA	NA	Unknown protein	NA	NA	0.867754	0.885826	Turquoise
TRINITY_DN27287_c0_g1	6.11246	0.00148247	0	1	NA	NA	NA	NA	NA	0.850264	0.869434	Turquoise
TRINITY_DN27260_c0_g2	2.13831	1	-2.52174	1	NA	NA	NA	NA	NA	0.825662	0.849993	Turquoise
TRINITY_DN27252_c0_g1	0.47001	1	0.193219	1	NA	NA	NA	NA	NA	0.8026	0.821002	Turquoise
TRINITY_DN27250_c0_g1	-3.91732	0.00488962	-0.0640076	1	NA	NA	NA	NA	NA	-0.822896	-0.832367	Turquoise
TRINITY_DN27243_c0_g1	6.35842	0.000239749	2.67417	1	NA	NA	NA	NA	NA	0.856274	0.838141	Turquoise
TRINITY_DN27233_c0_g3	3.36278	0.374191	-0.370039	1	NA	NA	Unknown protein	NA	NA	0.931151	0.932028	Turquoise
TRINITY_DN27233_c0_g1	3.54768	0.213588	-1.69462	1	NA	NA	Unknown protein	NA	NA	0.911296	0.911468	Turquoise
TRINITY_DN27218_c0_g2	1.73667	1	-0.615297	1	NA	NA	NA	NA	NA	0.818538	0.8296	Turquoise
TRINITY_DN2715_c0_g2	5.999	4.87e-05	4.46545	0.0404325	NA	NA	NA	NA	NA	0.87079	0.893125	Turquoise
TRINITY_DN2715_c0_g1	2.31092	0.995728	-0.740988	1	NA	NA	Unknown protein	NA	NA	0.872847	0.876803	Turquoise
TRINITY_DN27148_c0_g1	2.56513	0.0387873	-0.241408	1	NA	NA	NA	NA	NA	0.963006	0.967915	Turquoise
TRINITY_DN2714_c1_g1	5.02989	0.00179112	3.40983	0.365636	NA	NA	Unknown protein	NA	NA	0.90172	0.913624	Turquoise
TRINITY_DN27085_c0_g2	5.496	0.000237907	-1.71257	1	NA	NA	NA	NA	NA	0.942492	0.938009	Turquoise
TRINITY_DN2706_c0_g1	0.919213	1	-0.256954	1	tr|A0A1D1YB34|A0A1D1YB34_9ARAE	***	Leucine--tRNA ligase	IPR002302 (Leucine-tRNA ligase), IPR009080 (Aminoacyl-tRNA synthetase, class Ia, anticodon-binding)	GO:0000166, GO:0002161, GO:0004812, GO:0004823, GO:0005524, GO:0006412, GO:0006418, GO:0006429, GO:0016874, GO:0106074	0.917172	0.896297	Turquoise
TRINITY_DN27036_c1_g4	1.97729	0.620343	0.360931	1	NA	NA	Unknown protein	NA	NA	0.82863	0.814865	Turquoise
TRINITY_DN27018_c0_g1	5.28316	0.000202109	-2.24316	1	tr|M8CLX2|M8CLX2_AEGTA	*-*	Beta-fructofuranosidase, insoluble isoenzyme 7	IPR001362 (Glycoside hydrolase, family 32), IPR013189 (Glycosyl hydrolase family 32, C-terminal), IPR023296 (Glycosyl hydrolase, five-bladed beta-propellor domain)	GO:0004553, GO:0005975	0.960995	0.955457	Turquoise
TRINITY_DN27015_c0_g1	0.983086	1	0.365806	1	tr|A0A3B6MSY9|A0A3B6MSY9_WHEAT	*-*	DUF4477 domain-containing protein	IPR027951 (Domain of unknown function DUF4477)	NA	0.830988	0.834484	Turquoise
TRINITY_DN26993_c1_g1	5.05277	0.000568648	-0.584779	1	NA	NA	NA	NA	NA	0.831097	0.818525	Turquoise
TRINITY_DN2699_c0_g1	-1.86451	0.00202222	-0.0530819	1	tr|M0XAM8|M0XAM8_HORVV	***	Arp2/3 complex 34 kDa subunit	IPR007188 (Actin-related protein 2/3 complex subunit 2)	GO:0003779, GO:0005737, GO:0005856, GO:0005885, GO:0015629, GO:0030041, GO:0030833, GO:0034314	-0.910654	-0.904838	Turquoise
TRINITY_DN26927_c0_g1	5.1054	0.000243327	-2.10322	1	NA	NA	NA	NA	NA	0.975864	0.977402	Turquoise
TRINITY_DN26894_c0_g2	1.03363	1	-0.323313	1	NA	NA	NA	NA	NA	0.911604	0.915533	Turquoise
TRINITY_DN26894_c0_g1	0.77467	1	-0.263235	1	tr|A0A5B6VWM3|A0A5B6VWM3_9ROSI	***	Maltase-glucoamylase, intestinal protein	NA	NA	0.878616	0.873953	Turquoise
TRINITY_DN26891_c0_g1	1.98138	1	-0.935764	1	NA	NA	NA	NA	NA	0.867413	0.878713	Turquoise
TRINITY_DN26890_c2_g1	6.36821	0.000122611	0.559626	1	NA	NA	NA	NA	NA	0.928519	0.928814	Turquoise
TRINITY_DN2687_c0_g1	0.818053	1	-0.558397	1	NA	NA	Unknown protein	NA	NA	0.882561	0.886027	Turquoise
TRINITY_DN26822_c0_g1	1.44221	1	-0.519957	1	NA	NA	NA	NA	NA	0.791799	0.801932	Turquoise
TRINITY_DN26815_c0_g2	4.36173	0.000773687	1.18467	1	tr|A0A452YYP3|A0A452YYP3_AEGTS	***	zf-RVT domain-containing protein	NA	NA	0.960019	0.973933	Turquoise
TRINITY_DN26804_c0_g1	5.12242	0.0179241	2.88558	1	NA	NA	NA	NA	NA	0.832722	0.820393	Turquoise
TRINITY_DN26789_c0_g1	2.14909	0.0208594	0.320399	1	tr|A0A438F2I7|A0A438F2I7_VITVI	*-*	Stromal cell-derived factor 2-like protein	NA	NA	0.96281	0.954678	Turquoise
TRINITY_DN2676_c0_g3	1.73282	1	-6.13231	0.00777119	NA	NA	NA	NA	NA	0.811858	0.803076	Turquoise
TRINITY_DN26759_c0_g1	1.81196	0.371728	0.65458	1	NA	NA	Unknown protein	NA	NA	0.849138	0.844506	Turquoise
TRINITY_DN26748_c0_g1	3.81057	7.52e-06	2.0423	0.749401	NA	NA	NA	NA	NA	0.923802	0.937334	Turquoise
TRINITY_DN2673_c2_g1	2.12869	0.553396	-0.471014	1	NA	NA	NA	NA	NA	0.950831	0.948247	Turquoise
TRINITY_DN26696_c0_g1	3.02101	0.305294	0.870895	1	tr|A0A2X0SK42|A0A2X0SK42_WHEAT	***	CCHC-type domain-containing protein	IPR001878 (Zinc finger, CCHC-type)	GO:0003676, GO:0008270	0.893463	0.908913	Turquoise
TRINITY_DN26689_c0_g1	0.760605	1	-0.267676	1	tr|M8B4J6|M8B4J6_AEGTA	***	DUF1618 domain-containing protein	IPR011676 (Domain of unknown function DUF1618)	GO:0016020, GO:0016021	0.829106	0.825152	Turquoise
TRINITY_DN2662_c0_g4	5.90101	5.06e-06	3.75758	0.108207	NA	NA	NA	NA	NA	0.84807	0.861861	Turquoise
TRINITY_DN2662_c0_g3	6.26214	1.2e-11	4.42532	0.000168578	NA	NA	Unknown protein	NA	NA	0.831408	0.841489	Turquoise
TRINITY_DN2662_c0_g2	7.49674	1.46e-06	5.38233	0.013263	NA	NA	NA	NA	NA	0.808743	0.819332	Turquoise
TRINITY_DN2657_c1_g1	1.62102	0.779682	0.027763	1	tr|A0A287S3V4|A0A287S3V4_HORVV	*-*	WRKY domain-containing protein	IPR002182 (NB-ARC), IPR027417 (P-loop containing nucleoside triphosphate hydrolase)	GO:0003677, GO:0003700, GO:0005634, GO:0006355, GO:0043531, GO:0043565	0.844484	0.842165	Turquoise
TRINITY_DN26542_c0_g4	6.09265	0.000169553	2.38886	1	NA	NA	NA	NA	NA	0.978487	0.96892	Turquoise
TRINITY_DN2654_c0_g1	3.05153	0.0571487	0.0937911	1	NA	NA	Unknown protein	NA	NA	0.837917	0.836982	Turquoise
TRINITY_DN26538_c0_g2	2.82734	0.263312	-0.920693	1	NA	NA	NA	NA	NA	0.89329	0.886515	Turquoise
TRINITY_DN26517_c0_g1	3.26245	0.57798	1.69494	1	NA	NA	Unknown protein	NA	NA	0.901307	0.912906	Turquoise
TRINITY_DN2650_c0_g3	10.2963	5.71e-05	6.08743	0.227916	NA	NA	NA	NA	NA	0.94181	0.930899	Turquoise
TRINITY_DN26491_c0_g1	7.7596	0.00756683	3.76081	1	NA	NA	NA	NA	NA	0.957111	0.961416	Turquoise
TRINITY_DN26434_c0_g2	2.7793	0.441513	0.664641	1	NA	NA	NA	NA	NA	0.840867	0.852414	Turquoise
TRINITY_DN2641_c0_g1	2.07026	0.284499	0.772595	1	NA	NA	Unknown protein	NA	NA	0.808298	0.809525	Turquoise
TRINITY_DN26331_c0_g1	2.52228	5.72e-12	0.539219	1	NA	NA	NA	NA	NA	0.956469	0.957634	Turquoise
TRINITY_DN2629_c0_g3	-0.28712	1	-0.0963636	1	tr|A0A2R6QTG5|A0A2R6QTG5_ACTCC	***	Ras-related protein like	IPR001806 (Small GTPase superfamily), IPR027417 (P-loop containing nucleoside triphosphate hydrolase)	GO:0003924, GO:0005525	-0.801162	-0.825423	Turquoise
TRINITY_DN26275_c0_g1	10.2621	8.71e-18	8.93527	2.68e-12	NA	NA	Unknown protein	NA	NA	0.841794	0.862145	Turquoise
TRINITY_DN26234_c0_g1	1.2005	1	0.472329	1	NA	NA	NA	NA	NA	0.873897	0.870811	Turquoise
TRINITY_DN262_c0_g1	2.05597	0.267146	0.428594	1	NA	NA	NA	NA	NA	0.894551	0.890314	Turquoise
TRINITY_DN26198_c0_g1	3.39162	0.0041819	-0.711401	1	tr|A0A287GUI5|A0A287GUI5_HORVV	*-*	UDP-glucose 4-epimerase	IPR016040 (NAD(P)-binding domain)	GO:0003978, GO:0006012, GO:0016853	0.889379	0.877944	Turquoise
TRINITY_DN26186_c0_g1	2.57057	0.312787	1.19086	1	tr|A0A446VBL3|A0A446VBL3_TRITD	***	TF-B3 domain-containing protein	NA	NA	0.837939	0.865289	Turquoise
TRINITY_DN26155_c0_g1	-8.42412	2.18e-11	0.0742203	1	tr|A3A6Q7|A3A6Q7_ORYSJ	*-*	Reverse transcriptase domain-containing protein	NA	NA	-0.879243	-0.87752	Turquoise
TRINITY_DN26142_c0_g1	7.13997	0.000367686	4.20232	0.469563	tr|A0A3B6KQZ5|A0A3B6KQZ5_WHEAT	*-*	ULP_PROTEASE domain-containing protein	NA	NA	0.914616	0.919313	Turquoise
TRINITY_DN2610_c0_g1	-1.764	0.0221095	-0.377836	1	NA	NA	Unknown protein	NA	NA	-0.824729	-0.822249	Turquoise
TRINITY_DN26079_c0_g1	5.99323	0.00381546	2.08446	1	NA	NA	Unknown protein	NA	NA	0.873614	0.892691	Turquoise
TRINITY_DN26072_c0_g1	0.700547	1	-0.31812	1	NA	NA	NA	NA	NA	0.832434	0.828883	Turquoise
TRINITY_DN26023_c0_g1	5.01086	1.48e-05	2.03375	1	tr|A0A2G3CPU2|A0A2G3CPU2_CAPCH	*-*	Isoaspartyl peptidase/L-asparaginase	IPR000246 (Peptidase T2, asparaginase 2), IPR029055 (Nucleophile aminohydrolases, N-terminal)	GO:0016787	0.839669	0.841263	Turquoise
TRINITY_DN260_c0_g2	1.80197	1	-0.121004	1	NA	NA	NA	NA	NA	0.832228	0.84689	Turquoise
TRINITY_DN260_c0_g1	1.76363	1	-0.450748	1	NA	NA	Unknown protein	NA	NA	0.895165	0.905309	Turquoise
TRINITY_DN26_c0_g2	1.52638	0.951299	-0.990674	1	NA	NA	Unknown protein	NA	NA	0.932226	0.923769	Turquoise
TRINITY_DN25912_c0_g1	3.09543	0.0836188	0.62784	1	tr|I1GR49|I1GR49_BRADI	*-*	TIP120 domain-containing protein	IPR016024 (Armadillo-type fold)	GO:0005634, GO:0010265, GO:0016567	0.852852	0.87138	Turquoise
TRINITY_DN25870_c0_g1	2.76005	0.0693251	0.573956	1	tr|R7W9I3|R7W9I3_AEGTA	*-*	TF-B3 domain-containing protein	NA	GO:0003677, GO:0005634	0.955808	0.95678	Turquoise
TRINITY_DN2587_c0_g1	-0.788915	1	0.0715401	1	tr|A0A3B6MR34|A0A3B6MR34_WHEAT	***	OCRE domain-containing protein	NA	NA	-0.904144	-0.897323	Turquoise
TRINITY_DN25869_c2_g1	1.60832	1	-1.09734	1	NA	NA	NA	NA	NA	0.844512	0.842805	Turquoise
TRINITY_DN25854_c0_g1	3.1703	1	-4.92024	1	NA	NA	NA	NA	NA	0.843237	0.816116	Turquoise
TRINITY_DN25793_c0_g1	1.10249	1	-0.375708	1	NA	NA	NA	NA	NA	0.854837	0.855435	Turquoise
TRINITY_DN25776_c0_g2	1.00565	1	-0.485113	1	NA	NA	NA	NA	NA	0.814839	0.824199	Turquoise
TRINITY_DN25776_c0_g1	0.602486	1	-0.140118	1	tr|A0A0K9NXU5|A0A0K9NXU5_ZOSMR	***	Oxysterol-binding protein-like	IPR000648 (Oxysterol-binding protein)	NA	0.823592	0.833971	Turquoise
TRINITY_DN25736_c0_g1	8.43222	1.16e-10	0	1	tr|A0A287H5R1|A0A287H5R1_HORVV	***	Protein kinase domain-containing protein	IPR011009 (Protein kinase-like domain)	GO:0004672, GO:0005524, GO:0006468	0.943465	0.956316	Turquoise
TRINITY_DN2572_c1_g1	0.460382	1	-0.0108514	1	tr|A0A446S4Z5|A0A446S4Z5_TRITD	***	Protein-serine/threonine kinase	IPR003594 (Histidine kinase-like ATPase, C-terminal domain), IPR004358 (Signal transduction histidine kinase-related protein, C-terminal), IPR005467 (Histidine kinase domain), IPR018955 (Branched-chain alpha-ketoacid dehydrogenase kinase/Pyruvate dehydrogenase kinase, N-terminal)	NA	0.84851	0.853965	Turquoise
TRINITY_DN25678_c2_g1	3.83626	5.22e-05	1.39807	1	NA	NA	Unknown protein	NA	NA	0.807946	0.819159	Turquoise
TRINITY_DN25677_c0_g1	6.42069	0.000330088	2.87093	1	NA	NA	NA	NA	NA	0.959832	0.968905	Turquoise
TRINITY_DN2566_c0_g2	4.37365	0.149277	2.46258	1	NA	NA	NA	NA	NA	0.837626	0.839759	Turquoise
TRINITY_DN2564_c0_g1	1.02031	1	-0.848677	1	NA	NA	NA	NA	NA	0.895787	0.883391	Turquoise
TRINITY_DN25582_c0_g1	8.26308	1.1e-09	0	1	NA	NA	NA	NA	NA	0.913403	0.903122	Turquoise
TRINITY_DN2558_c0_g2	-0.391388	1	-0.0840541	1	tr|Q39893|Q39893_SOYBN	***	Protein kinase	IPR011009 (Protein kinase-like domain)	GO:0000166, GO:0004672, GO:0004674, GO:0005524, GO:0006468, GO:0016301, GO:0016310	-0.813175	-0.830266	Turquoise
TRINITY_DN25501_c0_g1	5.0361	1.04e-06	0.953519	1	NA	NA	NA	NA	NA	0.939431	0.93305	Turquoise
TRINITY_DN25492_c0_g2	1.99897	0.879889	-0.96591	1	tr|J3SDF5|J3SDF5_BETVU	*-*	Ty3/gypsy retrotransposon protein	IPR012337 (Ribonuclease H-like domain), IPR016197 (Chromo domain-like)	GO:0003676, GO:0015074	0.927441	0.924756	Turquoise
TRINITY_DN25483_c0_g1	2.00229	0.0952145	0.781372	1	tr|A0A3B6SEK9|A0A3B6SEK9_WHEAT	***	GSDH domain-containing protein	IPR011042 (Six-bladed beta-propeller, TolB-like)	NA	0.853944	0.846827	Turquoise
TRINITY_DN25476_c0_g2	3.01808	0.00685648	-0.827768	1	tr|A0A287UIP9|A0A287UIP9_HORVV	*-*	HD domain-containing protein	NA	GO:0015969	0.830632	0.835651	Turquoise
TRINITY_DN254570_c0_g1	5.90677	0.00180593	2.42999	1	NA	NA	Unknown protein	NA	NA	0.865257	0.868784	Turquoise
TRINITY_DN25436_c0_g1	2.81859	0.176463	0.479674	1	NA	NA	NA	NA	NA	0.925228	0.921357	Turquoise
TRINITY_DN25433_c0_g1	1.96565	0.850897	-0.41216	1	NA	NA	NA	NA	NA	0.920689	0.922552	Turquoise
TRINITY_DN25337_c0_g1	-3.42523	0.0509615	-0.0267186	1	tr|A0A287TVA3|A0A287TVA3_HORVV	*-*	Bac_surface_Ag domain-containing protein	IPR000184 (Bacterial surface antigen (D15))	GO:0019867	-0.805114	-0.810286	Turquoise
TRINITY_DN25325_c0_g1	1.356	1	-0.6559	1	tr|M8CRW4|M8CRW4_AEGTA	*-*	Glyceraldehyde-3-phosphate dehydrogenase	IPR016040 (NAD(P)-binding domain), IPR020828 (Glyceraldehyde 3-phosphate dehydrogenase, NAD(P) binding domain)	GO:0006006, GO:0009409, GO:0009416, GO:0009507, GO:0009535, GO:0009570, GO:0009744, GO:0009941, GO:0010319, GO:0016020, GO:0016491, GO:0016620, GO:0046686, GO:0048046, GO:0050661, GO:0051287, GO:0055114	0.804702	0.822829	Turquoise
TRINITY_DN25299_c0_g1	2.06091	0.137103	0.556077	1	NA	NA	NA	NA	NA	0.893865	0.905167	Turquoise
TRINITY_DN25209_c0_g1	2.57093	0.251753	0.918102	1	NA	NA	NA	NA	NA	0.832049	0.845352	Turquoise
TRINITY_DN252_c0_g1	2.7279	6.18e-07	1.21458	1	tr|A0A0D9XQ14|A0A0D9XQ14_9ORYZ	*-*	ANK_REP_REGION domain-containing protein	IPR020683 (Ankyrin repeat-containing domain)	GO:0016020, GO:0016021	0.935851	0.947263	Turquoise
TRINITY_DN25141_c0_g1	2.7947	0.153717	1.38632	1	tr|A0A1D6LWT3|A0A1D6LWT3_MAIZE	*-*	Chromatin structure-remodeling complex protein SYD	NA	GO:0005524, GO:0042393	0.804336	0.806873	Turquoise
TRINITY_DN25123_c0_g1	1.89264	1	-1.29216	1	NA	NA	NA	NA	NA	0.874461	0.881596	Turquoise
TRINITY_DN25113_c0_g1	4.42058	0.00507061	-0.0157457	1	NA	NA	NA	NA	NA	0.851749	0.875119	Turquoise
TRINITY_DN251_c1_g1	-1.78945	0.0281414	-0.498089	1	tr|A0A446XKL5|A0A446XKL5_TRITD	***	Auxin-responsive protein	IPR000270 (PB1 domain), IPR003311 (AUX/IAA protein), IPR033389 (AUX/IAA domain)	NA	-0.792545	-0.812907	Turquoise
TRINITY_DN25099_c0_g1	6.70458	7.65e-20	0.660727	1	NA	NA	NA	NA	NA	0.930408	0.944237	Turquoise
TRINITY_DN25098_c0_g2	3.34314	0.0569437	0.723359	1	NA	NA	NA	NA	NA	0.90845	0.920006	Turquoise
TRINITY_DN25063_c0_g1	5.84229	0.022837	3.37094	1	NA	NA	NA	NA	NA	0.816939	0.804845	Turquoise
TRINITY_DN25062_c0_g2	3.63979	0.00235137	-5.53575	0.00620847	NA	NA	Unknown protein	NA	NA	0.877056	0.870542	Turquoise
TRINITY_DN25015_c0_g1	4.3118	7.21e-05	2.83625	0.247889	NA	NA	NA	NA	NA	0.798776	0.808605	Turquoise
TRINITY_DN2499_c0_g3	5.04512	0.00122532	3.4015	0.370192	NA	NA	NA	NA	NA	0.845862	0.836289	Turquoise
TRINITY_DN2499_c0_g2	5.7489	0.000123439	4.04723	0.107791	NA	NA	NA	NA	NA	0.938576	0.946118	Turquoise
TRINITY_DN2499_c0_g1	5.81633	0.00548417	3.90255	0.493116	NA	NA	Unknown protein	NA	NA	0.950876	0.955458	Turquoise
TRINITY_DN24982_c0_g1	4.5239	0.0135926	-3.43234	0.958181	NA	NA	NA	NA	NA	0.930007	0.92767	Turquoise
TRINITY_DN24969_c0_g1	-1.72196	0.524147	0.00897863	1	NA	NA	NA	NA	NA	-0.855839	-0.861202	Turquoise
TRINITY_DN24966_c0_g1	2.0093	0.244665	0.647639	1	NA	NA	NA	NA	NA	0.849509	0.867543	Turquoise
TRINITY_DN24963_c0_g1	1.55256	1	-5.73702	0.00608191	NA	NA	NA	NA	NA	0.804469	0.800481	Turquoise
TRINITY_DN24944_c0_g1	7.06194	9.06e-06	0	1	NA	NA	NA	NA	NA	0.884808	0.880251	Turquoise
TRINITY_DN24931_c0_g2	3.95286	0.0669134	0.554222	1	NA	NA	NA	NA	NA	0.888234	0.876374	Turquoise
TRINITY_DN24927_c0_g3	5.83484	0.000974654	-0.594531	1	NA	NA	NA	NA	NA	0.921413	0.915383	Turquoise
TRINITY_DN24921_c0_g1	0.82471	1	-1.26079	1	tr|A0A1D6F751|A0A1D6F751_MAIZE	*-*	Pentatricopeptide repeat-containing protein mitochondrial	IPR002885 (Pentatricopeptide repeat)	GO:0005739	0.831969	0.814347	Turquoise
TRINITY_DN2491_c0_g1	0.863883	1	-0.0189146	1	tr|A0A1D6MLK5|A0A1D6MLK5_MAIZE	*-*	Mitochondrial substrate carrier family protein	IPR002067 (Mitochondrial carrier protein), IPR023395 (Mitochondrial carrier domain)	GO:0016020, GO:0016021, GO:0022857, GO:0055085	0.903237	0.902234	Turquoise
TRINITY_DN2490_c0_g1	2.79545	0.0292495	0.692737	1	NA	NA	NA	NA	NA	0.91448	0.918319	Turquoise
TRINITY_DN24875_c1_g2	8.01668	6.51e-07	5.94967	0.00505608	NA	NA	NA	NA	NA	0.860462	0.868649	Turquoise
TRINITY_DN248512_c0_g1	2.45435	0.0106757	0.251717	1	NA	NA	NA	NA	NA	0.884867	0.892361	Turquoise
TRINITY_DN24827_c0_g1	3.0455	0.108212	-1.60049	1	NA	NA	NA	NA	NA	0.929945	0.922615	Turquoise
TRINITY_DN2482_c0_g2	1.87822	0.893541	0.115115	1	tr|A0A0E0JHQ6|A0A0E0JHQ6_ORYPU	*-*	Dihydrolipoamide acetyltransferase component of pyruvate dehydrogenase complex	IPR022059 (Protein of unknown function DUF3615)	GO:0016740, GO:0016746	0.802061	0.816988	Turquoise
TRINITY_DN248_c0_g2	1.16978	1	-0.77413	1	tr|B4FQ39|B4FQ39_MAIZE	*-*	Retrotrans_gag domain-containing protein	NA	NA	0.854729	0.860531	Turquoise
TRINITY_DN24797_c0_g1	-7.2101	4e-08	0.535555	1	tr|A0A0Q3KC94|A0A0Q3KC94_BRADI	*-*	EF-hand domain-containing protein	IPR011992 (EF-hand domain pair), IPR025224 (Cell cycle and apoptosis regulator protein)	GO:0005509, GO:0006355	-0.882479	-0.870916	Turquoise
TRINITY_DN24783_c0_g1	2.6774	0.246554	-0.262333	1	NA	NA	NA	NA	NA	0.865108	0.88088	Turquoise
TRINITY_DN24773_c0_g1	6.1189	0.00044655	2.53855	1	NA	NA	NA	NA	NA	0.913832	0.917955	Turquoise
TRINITY_DN24768_c0_g1	-3.26949	0.000875217	0.311961	1	tr|A0A452ZDB1|A0A452ZDB1_AEGTS	*-*	Reverse transcriptase domain-containing protein	NA	NA	-0.805213	-0.804419	Turquoise
TRINITY_DN24693_c0_g1	2.10779	0.673902	-1.0411	1	tr|A0A1E5WJ07|A0A1E5WJ07_9POAL	***	Photosystem I reaction center subunit V, chloroplastic	IPR000549 (Photosystem I PsaG/PsaK protein), IPR023618 (Photosystem I PsaG/PsaK domain)	GO:0009522, GO:0015979, GO:0016020, GO:0016021	0.883562	0.877356	Turquoise
TRINITY_DN24655_c0_g1	1.84292	0.991805	-0.897061	1	NA	NA	NA	NA	NA	0.850248	0.847169	Turquoise
TRINITY_DN24651_c0_g1	3.44227	0.260512	1.01628	1	tr|R7W3D6|R7W3D6_AEGTA	*-*	ADP-ribosylation factor-related protein 1	NA	GO:0000166, GO:0005525	0.845442	0.855983	Turquoise
TRINITY_DN24621_c0_g1	2.84776	0.215581	0.364504	1	NA	NA	NA	NA	NA	0.91168	0.910961	Turquoise
TRINITY_DN24580_c0_g1	5.00469	0.00769685	1.34896	1	NA	NA	NA	NA	NA	0.903405	0.889635	Turquoise
TRINITY_DN24575_c0_g1	2.10059	0.557186	-0.518056	1	tr|I1GW78|I1GW78_BRADI	*-*	Glutamate receptor	IPR001638 (Solute-binding protein family 3/N-terminal domain of MltF), IPR028082 (Periplasmic binding protein-like I)	GO:0004970, GO:0005886, GO:0006811, GO:0016020, GO:0016021, GO:0035235	0.82795	0.81814	Turquoise
TRINITY_DN24574_c0_g1	-0.782583	1	-0.186125	1	tr|Q9M671|Q9M671_WHEAT	***	AKT1-like potassium channel	IPR003938 (Potassium channel, voltage-dependent, EAG/ELK/ERG), IPR020683 (Ankyrin repeat-containing domain)	GO:0005216, GO:0005244, GO:0005249, GO:0005267, GO:0006811, GO:0006813, GO:0016020, GO:0016021, GO:0034765, GO:0055085, GO:0071805	-0.865025	-0.865766	Turquoise
TRINITY_DN24494_c0_g1	1.93662	0.401692	0.161958	1	NA	NA	Unknown protein	NA	NA	0.889823	0.883959	Turquoise
TRINITY_DN24482_c1_g1	3.30487	0.141319	0.945227	1	NA	NA	NA	NA	NA	0.91839	0.907585	Turquoise
TRINITY_DN24477_c1_g1	2.74745	0.531937	-3.45662	0.922381	NA	NA	NA	NA	NA	0.773744	0.803476	Turquoise
TRINITY_DN2447_c0_g3	0.851725	1	0.0311723	1	NA	NA	NA	NA	NA	0.844794	0.819196	Turquoise
TRINITY_DN2447_c0_g1	9.41573	4.08e-14	0	1	tr|A0A287PUN5|A0A287PUN5_HORVV	***	Fe2OG dioxygenase domain-containing protein	IPR005123 (Oxoglutarate/iron-dependent dioxygenase), IPR026992 (Non-haem dioxygenase N-terminal domain), IPR027443 (Isopenicillin N synthase-like)	GO:0016491, GO:0046872, GO:0055114	0.936167	0.941416	Turquoise
TRINITY_DN24450_c0_g1	0.953885	1	0.108584	1	tr|A0A287L7H7|A0A287L7H7_HORVV	***	Lipase_3 domain-containing protein	IPR029058 (Alpha/Beta hydrolase fold), IPR033556 (Phospholipase A1-II)	GO:0006629, GO:0008970, GO:0016787	0.853665	0.869399	Turquoise
TRINITY_DN2442_c1_g2	1.97574	0.546161	0.462745	1	tr|A0A287HLQ8|A0A287HLQ8_HORVV	*-*	Abhydrolase_3 domain-containing protein	IPR029058 (Alpha/Beta hydrolase fold)	GO:0016787	0.881149	0.874189	Turquoise
TRINITY_DN24373_c0_g1	4.24917	0.0362068	1.62097	1	tr|A0A1E5UZF3|A0A1E5UZF3_9POAL	*-*	Shikimate O-hydroxycinnamoyltransferase	IPR003480 (Transferase), IPR023213 (Chloramphenicol acetyltransferase-like domain)	GO:0016740, GO:0016747	0.895955	0.914393	Turquoise
TRINITY_DN24354_c0_g1	2.29269	0.490113	-0.406704	1	tr|A0A1R3GC16|A0A1R3GC16_COCAP	*-*	Disease resistance protein	IPR002182 (NB-ARC), IPR027417 (P-loop containing nucleoside triphosphate hydrolase)	GO:0043531	0.858385	0.857853	Turquoise
TRINITY_DN24342_c1_g1	1.43354	1	-0.613438	1	tr|A0A2U1PV21|A0A2U1PV21_ARTAN	***	Retrovirus-related Pol polyprotein from transposon TNT 1-94	IPR012337 (Ribonuclease H-like domain), IPR013103 (Reverse transcriptase, RNA-dependent DNA polymerase), IPR025724 (GAG-pre-integrase domain)	GO:0000943, GO:0003676, GO:0015074	0.889254	0.89271	Turquoise
TRINITY_DN24299_c0_g1	1.5094	0.834095	-0.265014	1	tr|R7W1P7|R7W1P7_AEGTA	***	Rho GTPase-activating protein 24	IPR008936 (Rho GTPase activation protein), IPR011993 (PH domain-like), IPR025757 (Ternary complex factor MIP1, leucine-zipper)	GO:0005096, GO:0005938, GO:0007165, GO:0009846, GO:0009860, GO:0009865, GO:0016324, GO:0017048, GO:0035024, GO:0043547, GO:0045177, GO:0048868, GO:0070382, GO:0090406, GO:0090630	0.888755	0.900003	Turquoise
TRINITY_DN24296_c1_g1	-5.88806	7.89e-05	0.371564	1	tr|N1QTF4|N1QTF4_AEGTA	*-*	DEAD-box ATP-dependent RNA helicase 37	NA	GO:0003676, GO:0004386, GO:0005524	-0.851789	-0.833131	Turquoise
TRINITY_DN24276_c0_g1	4.66522	0.0331948	-0.590928	1	NA	NA	NA	NA	NA	0.830917	0.81825	Turquoise
TRINITY_DN24274_c0_g1	3.08752	0.00413264	2.03286	0.885969	NA	NA	NA	NA	NA	0.805736	0.832063	Turquoise
TRINITY_DN2427_c0_g1	-0.653216	1	-0.000776632	1	tr|D7M5V7|D7M5V7_ARALL	***	Structural constituent of ribosome	IPR005134 (Uncharacterised protein family UPF0114)	GO:0009507, GO:0009706, GO:0009941, GO:0016020, GO:0016021	-0.826088	-0.828739	Turquoise
TRINITY_DN24264_c0_g2	6.29673	0.000206729	0	1	NA	NA	NA	NA	NA	0.943487	0.947096	Turquoise
TRINITY_DN24253_c0_g1	2.27822	0.416631	-0.151756	1	NA	NA	NA	NA	NA	0.842524	0.860143	Turquoise
TRINITY_DN24252_c0_g2	10.4307	2.02e-19	-0.57851	1	NA	NA	NA	NA	NA	0.931119	0.931762	Turquoise
TRINITY_DN24244_c0_g1	-6.53791	5.61e-06	-0.424766	1	NA	NA	NA	NA	NA	-0.848558	-0.849782	Turquoise
TRINITY_DN24180_c0_g1	1.28469	1	-0.987424	1	NA	NA	NA	NA	NA	0.871485	0.866678	Turquoise
TRINITY_DN24139_c0_g1	4.09853	0.44075	1.35582	1	tr|F2CW18|F2CW18_HORVV	***	Chlorophyll a-b binding protein, chloroplastic	IPR022796 (Chlorophyll A-B binding protein), IPR023329 (Chlorophyll a/b binding protein domain)	GO:0009507, GO:0009522, GO:0009523, GO:0009535, GO:0009536, GO:0009579, GO:0009765, GO:0015979, GO:0016020, GO:0016021, GO:0016168, GO:0018298	0.819807	0.84098	Turquoise
TRINITY_DN24115_c0_g1	1.93834	0.985801	-0.336651	1	NA	NA	NA	NA	NA	0.906165	0.904458	Turquoise
TRINITY_DN2410_c4_g1	3.32441	0.00274343	-0.92951	1	NA	NA	Unknown protein	NA	NA	0.91675	0.922506	Turquoise
TRINITY_DN24076_c0_g2	2.45289	0.247235	-0.485942	1	tr|A0A3B6MLU7|A0A3B6MLU7_WHEAT	***	Kinesin motor domain-containing protein	IPR001752 (Kinesin motor domain), IPR027417 (P-loop containing nucleoside triphosphate hydrolase)	NA	0.904855	0.908975	Turquoise
TRINITY_DN2407_c0_g2	1.69243	0.441399	0.0950754	1	NA	NA	Unknown protein	NA	NA	0.91051	0.907275	Turquoise
TRINITY_DN24066_c0_g1	4.94097	0.0150161	2.23514	1	tr|A0A2K2DH11|A0A2K2DH11_BRADI	*-*	TTF-type domain-containing protein	IPR006580 (Zinc finger, TTF-type)	GO:0046983	0.898964	0.913042	Turquoise
TRINITY_DN24015_c0_g1	6.20562	0.000429539	4.26162	0.210286	NA	NA	NA	NA	NA	0.83423	0.855406	Turquoise
TRINITY_DN2396_c0_g1	0.930774	1	0.118384	1	tr|A0A3L6SDY3|A0A3L6SDY3_PANMI	***	Protein COFACTOR ASSEMBLY OF COMPLEX C SUBUNIT B CCB2, chloroplastic	IPR021325 (Cofactor assembly of complex C subunit B, CCB2/CCB4)	NA	0.932317	0.940145	Turquoise
TRINITY_DN23950_c1_g1	5.60418	0.140541	3.01532	1	NA	NA	NA	NA	NA	0.855584	0.865356	Turquoise
TRINITY_DN23939_c0_g2	3.1877	0.00267775	1.72426	1	NA	NA	Unknown protein	NA	NA	0.867132	0.889353	Turquoise
TRINITY_DN23929_c0_g1	4.6	0.000282495	2.40223	0.990484	NA	NA	NA	NA	NA	0.928754	0.9367	Turquoise
TRINITY_DN23916_c0_g1	3.90894	0.00983009	-0.268015	1	NA	NA	NA	NA	NA	0.92112	0.931655	Turquoise
TRINITY_DN23908_c1_g1	7.59043	9.28e-06	4.90631	0.0981589	NA	NA	NA	NA	NA	0.853433	0.867381	Turquoise
TRINITY_DN23882_c1_g1	3.21334	0.427391	-2.7264	1	NA	NA	NA	NA	NA	0.885194	0.905217	Turquoise
TRINITY_DN23879_c0_g2	2.38282	1	-0.699872	1	NA	NA	NA	NA	NA	0.885728	0.886636	Turquoise
TRINITY_DN23877_c0_g2	0.981689	1	-0.885734	1	NA	NA	NA	NA	NA	0.811706	0.812323	Turquoise
TRINITY_DN23815_c0_g1	1.02967	1	0.094334	1	tr|A0A0D9Z7I8|A0A0D9Z7I8_9ORYZ	*-*	Phosphatidylinositol 4-phosphate 5-kinase	IPR002498 (Phosphatidylinositol-4-phosphate 5-kinase, core), IPR023610 (Phosphatidylinositol-4-phosphate 5-kinase), IPR027483 (Phosphatidylinositol-4-phosphate 5-kinase, C-terminal), IPR027484 (Phosphatidylinositol-4-phosphate 5-kinase, N-terminal domain)	GO:0000166, GO:0005524, GO:0016301, GO:0016307, GO:0016308, GO:0016310, GO:0016740, GO:0046488, GO:0046854	0.813607	0.810984	Turquoise
TRINITY_DN23791_c0_g2	1.60719	1	0.455194	1	NA	NA	NA	NA	NA	0.842008	0.851145	Turquoise
TRINITY_DN23757_c0_g1	1.40453	1	-1.31189	1	tr|A0A3B6DN92|A0A3B6DN92_WHEAT	***	HMA domain-containing protein	IPR006121 (Heavy metal-associated domain, HMA)	NA	0.810605	0.81848	Turquoise
TRINITY_DN2374_c0_g1	3.04368	4.9e-08	1.82482	0.297768	NA	NA	NA	NA	NA	0.901653	0.904197	Turquoise
TRINITY_DN23725_c0_g1	4.4782	0.0357897	2.75182	1	NA	NA	NA	NA	NA	0.838139	0.841367	Turquoise
TRINITY_DN23695_c6_g1	1.26697	1	0.445202	1	tr|A0A5A7QID0|A0A5A7QID0_STRAF	*-*	Photosystem I subunit II	NA	NA	0.876085	0.869339	Turquoise
TRINITY_DN23645_c0_g1	3.34607	0.194944	-2.93498	1	tr|R7WEK0|R7WEK0_AEGTA	***	Splicing factor U2af small subunit B	IPR009145 (U2 auxiliary factor small subunit), IPR012677 (Nucleotide-binding alpha-beta plait domain)	GO:0000398, GO:0003676, GO:0003723, GO:0016020, GO:0016021, GO:0046872, GO:0089701	0.94431	0.938573	Turquoise
TRINITY_DN23630_c0_g1	2.15865	1	-0.11349	1	tr|A0A1R3J7K6|A0A1R3J7K6_COCAP	***	Eukaryotic porin/Tom40	IPR023614 (Porin domain), IPR027246 (Eukaryotic porin/Tom40)	GO:0005741, GO:0008308, GO:0015698, GO:0055085, GO:0098656	0.813637	0.824649	Turquoise
TRINITY_DN23601_c0_g2	0.984032	1	-0.625754	1	NA	NA	NA	NA	NA	0.852568	0.848023	Turquoise
TRINITY_DN23600_c0_g1	2.01918	0.431696	-0.202775	1	NA	NA	NA	NA	NA	0.860228	0.878018	Turquoise
TRINITY_DN23575_c0_g3	4.92647	0.0713728	2.38883	1	NA	NA	NA	NA	NA	0.844425	0.840015	Turquoise
TRINITY_DN23574_c0_g1	1.57997	1	-2.00644	1	NA	NA	NA	NA	NA	0.81524	0.800272	Turquoise
TRINITY_DN23558_c0_g3	-8.56007	3.35e-12	-0.487978	1	tr|A0A3B6U6C5|A0A3B6U6C5_WHEAT	*-*	GST C-terminal domain-containing protein	NA	NA	-0.887763	-0.887264	Turquoise
TRINITY_DN23541_c0_g1	4.19412	0.0145728	1.93944	1	NA	NA	NA	NA	NA	0.894413	0.902976	Turquoise
TRINITY_DN23508_c0_g2	2.23507	0.155861	-2.06319	1	NA	NA	NA	NA	NA	0.911994	0.915125	Turquoise
TRINITY_DN2350_c0_g1	0.746061	1	-0.0591651	1	tr|A0A3B6RGN0|A0A3B6RGN0_WHEAT	***	Aa_trans domain-containing protein	IPR013057 (Amino acid transporter, transmembrane domain)	NA	0.852955	0.860515	Turquoise
TRINITY_DN235_c0_g1	2.88255	0.128562	1.63731	1	tr|M7YJ72|M7YJ72_TRIUA	*-*	DEAD-box ATP-dependent RNA helicase 52A	IPR022059 (Protein of unknown function DUF3615)	GO:0003676, GO:0004386, GO:0005524	0.882491	0.892352	Turquoise
TRINITY_DN23487_c0_g1	3.53007	6.21e-05	1.87815	1	tr|A0A453BMR7|A0A453BMR7_AEGTS	***	MAGE domain-containing protein	IPR002190 (MAGE homology domain)	NA	0.886395	0.899357	Turquoise
TRINITY_DN23469_c0_g2	4.20601	0.0608684	1.77015	1	tr|A0A287SBK8|A0A287SBK8_HORVV	*-*	Glycosyltransferase	NA	NA	0.876123	0.880007	Turquoise
TRINITY_DN23459_c0_g1	2.48318	1	-0.699729	1	NA	NA	NA	NA	NA	0.903653	0.912571	Turquoise
TRINITY_DN234436_c0_g1	5.95807	0.00105964	1.13842	1	tr|A0A0E0BMQ8|A0A0E0BMQ8_9ORYZ	*-*	RPOLA_N domain-containing protein	NA	GO:0003677, GO:0003899, GO:0006351	0.863589	0.834854	Turquoise
TRINITY_DN23402_c0_g2	0.575358	1	-0.110962	1	tr|A0A5B6VMP3|A0A5B6VMP3_9ROSI	***	tRNA dimethylallyltransferase	IPR021489 (Protein of unknown function DUF3143)	NA	0.826641	0.818046	Turquoise
TRINITY_DN2340_c6_g1	3.80407	0.436425	1.17862	1	NA	NA	NA	NA	NA	0.962315	0.965061	Turquoise
TRINITY_DN23378_c0_g2	2.3441	0.738459	-1.35178	1	NA	NA	NA	NA	NA	0.938453	0.940922	Turquoise
TRINITY_DN23368_c0_g1	2.55732	0.696708	-3.6301	0.798683	NA	NA	Unknown protein	NA	NA	0.820306	0.803825	Turquoise
TRINITY_DN2335_c0_g1	2.27717	4.02e-05	0.883791	1	tr|A0A287W819|A0A287W819_HORVV	***	EamA domain-containing protein	IPR000620 (EamA domain)	GO:0016020, GO:0016021	0.851065	0.876378	Turquoise
TRINITY_DN23342_c1_g2	1.94448	0.584901	-1.27035	1	NA	NA	NA	NA	NA	0.93998	0.93656	Turquoise
TRINITY_DN232975_c0_g1	5.5292	0.000462359	3.22047	0.596884	NA	NA	Unknown protein	NA	NA	0.921224	0.922383	Turquoise
TRINITY_DN23270_c0_g1	1.89865	0.776223	0.366302	1	NA	NA	NA	NA	NA	0.814827	0.835513	Turquoise
TRINITY_DN232665_c0_g1	8.94373	0.000173419	4.94909	0.454694	NA	NA	Unknown protein	NA	NA	0.893416	0.902797	Turquoise
TRINITY_DN2326_c0_g1	0.987314	1	-0.251688	1	tr|M0WT06|M0WT06_HORVV	***	Smr domain-containing protein	IPR002625 (Smr domain), IPR013899 (Domain of unknown function DUF1771)	NA	0.923615	0.919025	Turquoise
TRINITY_DN232581_c9_g1	6.47098	0.000866857	2.61972	1	NA	NA	NA	NA	NA	0.925334	0.910448	Turquoise
TRINITY_DN23244_c0_g2	1.9035	0.654306	-1.68489	1	NA	NA	Unknown protein	NA	NA	0.84719	0.854295	Turquoise
TRINITY_DN2322_c0_g1	3.11969	0.00084658	-0.0142189	1	NA	NA	Unknown protein	NA	NA	0.96913	0.974696	Turquoise
TRINITY_DN23213_c1_g1	1.57303	1	-0.961097	1	tr|A0A446W174|A0A446W174_TRITD	***	F-box domain-containing protein	NA	NA	0.831622	0.844341	Turquoise
TRINITY_DN23188_c1_g1	6.22471	0.00024686	4.58194	0.102582	NA	NA	Unknown protein	NA	NA	0.796384	0.802429	Turquoise
TRINITY_DN23184_c0_g1	1.78489	1	-0.626581	1	NA	NA	NA	NA	NA	0.826084	0.827987	Turquoise
TRINITY_DN23161_c1_g2	1.56084	0.919662	0.0358042	1	NA	NA	NA	NA	NA	0.852003	0.874163	Turquoise
TRINITY_DN23122_c0_g1	5.92787	0.000839615	3.74452	0.47862	NA	NA	NA	NA	NA	0.850855	0.853409	Turquoise
TRINITY_DN23102_c1_g2	2.28121	0.109127	0.680006	1	tr|A0A5A7P3B3|A0A5A7P3B3_STRAF	***	Amp-dependent synthetase and ligase	NA	NA	0.865843	0.872305	Turquoise
TRINITY_DN23051_c0_g2	3.05093	0.280265	-0.290579	1	NA	NA	NA	NA	NA	0.886522	0.86675	Turquoise
TRINITY_DN23018_c1_g1	2.68762	0.406215	0.230197	1	NA	NA	Unknown protein	NA	NA	0.853284	0.865841	Turquoise
TRINITY_DN23000_c2_g1	1.34714	1	-2.69032	1	NA	NA	NA	NA	NA	0.815481	0.816786	Turquoise
TRINITY_DN22992_c0_g1	1.9443	0.850608	-0.167793	1	tr|A0A3B6S9I9|A0A3B6S9I9_WHEAT	***	zf-XS domain-containing protein	NA	NA	0.837823	0.817263	Turquoise
TRINITY_DN22987_c1_g1	3.04757	0.198176	0.963144	1	NA	NA	NA	NA	NA	0.843684	0.840463	Turquoise
TRINITY_DN22979_c0_g4	6.65796	3.41e-05	0	1	NA	NA	NA	NA	NA	0.941223	0.937878	Turquoise
TRINITY_DN22947_c0_g1	2.83104	0.039889	1.38337	1	tr|R7W977|R7W977_AEGTA	*-*	ATP phosphoribosyltransferase	IPR015867 (Nitrogen regulatory protein PII/ATP phosphoribosyltransferase, C-terminal)	GO:0000105, GO:0000287, GO:0003879, GO:0005737, GO:0016740, GO:0016757	0.9114	0.919734	Turquoise
TRINITY_DN22938_c0_g1	3.02402	0.169645	1.23571	1	tr|A0A287JTS0|A0A287JTS0_HORVV	*-*	NB-ARC domain-containing protein	IPR001611 (Leucine-rich repeat), IPR006553 (Leucine-rich repeat, cysteine-containing subtype), IPR032675 (Leucine-rich repeat domain, L domain-like)	GO:0043531	0.861237	0.850349	Turquoise
TRINITY_DN22926_c0_g1	5.00363	0.0134264	1.9376	1	NA	NA	NA	NA	NA	0.791205	0.811092	Turquoise
TRINITY_DN2292_c0_g1	0.841719	1	-0.0143254	1	NA	NA	NA	NA	NA	0.911339	0.923806	Turquoise
TRINITY_DN22842_c0_g1	5.07425	6.99e-05	3.08426	0.357082	tr|B4G1N4|B4G1N4_MAIZE	***	CsAtPR5	NA	NA	0.793653	0.823437	Turquoise
TRINITY_DN22832_c0_g3	3.18589	0.18157	-0.279472	1	NA	NA	NA	NA	NA	0.864785	0.875032	Turquoise
TRINITY_DN2282_c0_g1	0.47878	1	-0.318812	1	tr|M7YJ37|M7YJ37_TRIUA	***	60S ribosomal protein L9	IPR000702 (Ribosomal protein L6)	GO:0003735, GO:0005840, GO:0006412, GO:0019843	0.850888	0.845258	Turquoise
TRINITY_DN2281_c0_g1	2.05418	0.00224401	0.599879	1	NA	NA	Unknown protein	NA	NA	0.916739	0.919945	Turquoise
TRINITY_DN2280_c0_g1	-1.97977	0.000105808	0.161706	1	tr|A0A0K9PNY0|A0A0K9PNY0_ZOSMR	***	Sequence-specific DNA binding transcription factor	NA	NA	-0.949184	-0.94473	Turquoise
TRINITY_DN2274_c0_g1	0.392714	1	-0.216822	1	tr|A0A3B6TE42|A0A3B6TE42_WHEAT	***	AAA domain-containing protein	IPR003959 (ATPase, AAA-type, core), IPR027417 (P-loop containing nucleoside triphosphate hydrolase)	NA	0.826481	0.81497	Turquoise
TRINITY_DN22737_c0_g1	4.99501	0.000196428	2.48685	1	NA	NA	NA	NA	NA	0.900258	0.885367	Turquoise
TRINITY_DN22728_c0_g1	1.45858	1	-0.85363	1	tr|A0A0Q3JFX7|A0A0Q3JFX7_BRADI	***	Protein kinase domain-containing protein	IPR000742 (EGF-like domain), IPR009030 (Growth factor receptor cysteine-rich domain), IPR011009 (Protein kinase-like domain), IPR013320 (Concanavalin A-like lectin/glucanase domain), IPR025287 (Wall-associated receptor kinase, galacturonan-binding domain)	GO:0004672, GO:0005509, GO:0005524, GO:0006468, GO:0016020, GO:0016021, GO:0030247	0.86929	0.860309	Turquoise
TRINITY_DN22696_c1_g2	2.11544	1	-1.10908	1	NA	NA	NA	NA	NA	0.875747	0.861448	Turquoise
TRINITY_DN2269_c0_g1	-1.52134	0.0228013	0.0275645	1	tr|A0A3L6FXH8|A0A3L6FXH8_MAIZE	***	Ultraviolet-B receptor UVR8	IPR009091 (Regulator of chromosome condensation 1/beta-lactamase-inhibitor protein II), IPR032996 (Ultraviolet-B receptor UVR8)	NA	-0.899458	-0.900068	Turquoise
TRINITY_DN2268_c0_g3	2.93106	0.651317	-3.98443	0.773056	NA	NA	Unknown protein	NA	NA	0.888518	0.882086	Turquoise
TRINITY_DN22577_c0_g1	1.43085	1	-0.0105075	1	tr|B4FAS6|B4FAS6_MAIZE	***	HXXXD-type acyl-transferase family protein	IPR003480 (Transferase), IPR023213 (Chloramphenicol acetyltransferase-like domain)	GO:0016740, GO:0016747	0.859518	0.873689	Turquoise
TRINITY_DN22528_c0_g3	1.61322	1	-0.479237	1	tr|G7KVQ2|G7KVQ2_MEDTR	*-*	C2H2-type zinc finger protein	IPR015880 (Zinc finger, C2H2-like)	GO:0003676	0.884065	0.874996	Turquoise
TRINITY_DN22517_c0_g1	1.21374	1	-1.07485	1	NA	NA	NA	NA	NA	0.819606	0.822318	Turquoise
TRINITY_DN2249_c0_g3	-5.61676	3.98e-05	-0.128541	1	tr|A0A287FFW0|A0A287FFW0_HORVV	*-*	Aldo_ket_red domain-containing protein	IPR023210 (NADP-dependent oxidoreductase domain)	GO:0016491, GO:0055114	-0.881826	-0.878614	Turquoise
TRINITY_DN2249_c0_g2	1.64337	0.156554	0.295841	1	tr|A0A287FFV9|A0A287FFV9_HORVV	*-*	Aldo_ket_red domain-containing protein	IPR023210 (NADP-dependent oxidoreductase domain)	GO:0009443, GO:0009507, GO:0016491, GO:0042821, GO:0050236, GO:0055114, GO:0070402	0.944061	0.954088	Turquoise
TRINITY_DN2249_c0_g1	0.970014	1	0.00290277	1	tr|A0A287FFX0|A0A287FFX0_HORVV	***	Aldo_ket_red domain-containing protein	IPR020471 (Aldo/keto reductase), IPR023210 (NADP-dependent oxidoreductase domain)	GO:0016491, GO:0055114	0.917885	0.926323	Turquoise
TRINITY_DN22478_c0_g2	2.13812	0.166983	-0.205451	1	NA	NA	NA	NA	NA	0.825909	0.822339	Turquoise
TRINITY_DN2245_c0_g1	0.369973	1	0.00556813	1	tr|A0A3B6PLF2|A0A3B6PLF2_WHEAT	***	Protein kinase domain-containing protein	IPR011009 (Protein kinase-like domain)	NA	0.806312	0.817676	Turquoise
TRINITY_DN22440_c0_g1	-1.84702	0.000638097	-0.535203	1	tr|A0A3L6FJJ2|A0A3L6FJJ2_MAIZE	***	Pentatricopeptide repeat-containing protein	IPR002885 (Pentatricopeptide repeat), IPR011990 (Tetratricopeptide-like helical domain)	NA	-0.842227	-0.861809	Turquoise
TRINITY_DN2240_c0_g2	1.8202	0.595882	0.431567	1	NA	NA	NA	NA	NA	0.817018	0.818546	Turquoise
TRINITY_DN2239_c0_g1	4.66201	2.53e-15	2.61071	0.0124909	NA	NA	Unknown protein	NA	NA	0.922477	0.913921	Turquoise
TRINITY_DN22384_c0_g1	1.24973	1	-0.830596	1	tr|A0A446YMA3|A0A446YMA3_TRITD	*-*	Beta-galactosidase	IPR001944 (Glycoside hydrolase, family 35), IPR017853 (Glycoside hydrolase superfamily)	NA	0.848702	0.842871	Turquoise
TRINITY_DN22369_c0_g1	8.99187	1.03e-13	0	1	tr|M0X0B5|M0X0B5_HORVV	*-*	Peptidase A1 domain-containing protein	NA	GO:0004190, GO:0006508, GO:0008233, GO:0016787	0.9941	0.99307	Turquoise
TRINITY_DN22366_c1_g1	5.27482	0.00665384	2.19187	1	NA	NA	NA	NA	NA	0.835415	0.837808	Turquoise
TRINITY_DN22332_c0_g1	-1.78014	0.419244	0.324333	1	NA	NA	NA	NA	NA	-0.897026	-0.883906	Turquoise
TRINITY_DN22299_c1_g1	3.98919	0.00994969	0.459111	1	NA	NA	NA	NA	NA	0.896629	0.886639	Turquoise
TRINITY_DN22293_c0_g3	2.45935	0.0238898	-1.87228	0.947461	tr|A0A1D6IPM0|A0A1D6IPM0_MAIZE	***	Reverse transcriptase domain-containing protein	IPR000477 (Reverse transcriptase domain), IPR005135 (Endonuclease/exonuclease/phosphatase), IPR026960 (Reverse transcriptase zinc-binding domain)	GO:0003677, GO:0004519, GO:0006281, GO:0090305	0.937057	0.933749	Turquoise
TRINITY_DN22246_c1_g1	3.21911	0.0121598	0.748156	1	NA	NA	NA	NA	NA	0.927995	0.942508	Turquoise
TRINITY_DN22208_c0_g1	2.66334	0.102615	1.60646	1	tr|A0A446W4B5|A0A446W4B5_TRITD	***	F-box domain-containing protein	IPR001810 (F-box domain)	NA	0.782199	0.810068	Turquoise
TRINITY_DN22193_c0_g1	0.857159	1	-1.62495	0.62773	NA	NA	NA	NA	NA	0.833875	0.826049	Turquoise
TRINITY_DN22167_c0_g1	-0.615656	1	-0.136898	1	tr|I1HFH1|I1HFH1_BRADI	***	J domain-containing protein	IPR001623 (DnaJ domain)	GO:0005783, GO:0005789, GO:0006457	-0.80223	-0.812957	Turquoise
TRINITY_DN22163_c0_g2	1.58312	0.822946	-0.33203	1	NA	NA	Unknown protein	NA	NA	0.920743	0.916935	Turquoise
TRINITY_DN2216_c1_g1	0.420185	1	0.170957	1	tr|A0A287P949|A0A287P949_HORVV	***	Glycos_transf_1 domain-containing protein	IPR001296 (Glycosyl transferase, family 1)	NA	0.804115	0.80836	Turquoise
TRINITY_DN22158_c0_g1	0.92903	1	-0.618406	1	NA	NA	NA	NA	NA	0.88937	0.892413	Turquoise
TRINITY_DN22152_c0_g1	3.79929	0.326553	1.01626	1	NA	NA	NA	NA	NA	0.866642	0.860086	Turquoise
TRINITY_DN22127_c0_g1	5.99949	0.000461631	0.573873	1	NA	NA	NA	NA	NA	0.969897	0.974677	Turquoise
TRINITY_DN22113_c0_g2	1.34893	1	-0.343437	1	tr|A0A3L6PYZ8|A0A3L6PYZ8_PANMI	***	Pentatricopeptide repeat-containing protein	IPR002885 (Pentatricopeptide repeat), IPR011990 (Tetratricopeptide-like helical domain)	NA	0.895382	0.904773	Turquoise
TRINITY_DN221015_c0_g1	5.29388	0.0117151	3.52787	0.727698	NA	NA	NA	NA	NA	0.785401	0.801629	Turquoise
TRINITY_DN221_c0_g2	2.29795	0.0881143	1.05538	1	NA	NA	NA	NA	NA	0.910243	0.914794	Turquoise
TRINITY_DN22092_c0_g1	4.24609	0.428588	0.319054	1	NA	NA	NA	NA	NA	0.960012	0.970188	Turquoise
TRINITY_DN22076_c0_g1	1.46552	0.711177	-0.647741	1	NA	NA	NA	NA	NA	0.893735	0.884069	Turquoise
TRINITY_DN22069_c0_g2	4.6252	0.00505671	-0.328286	1	NA	NA	NA	NA	NA	0.959684	0.965439	Turquoise
TRINITY_DN22061_c0_g1	10.3849	0.00193725	6.48008	0.410457	tr|A0A2K2D9S6|A0A2K2D9S6_BRADI	*-*	Protein kinase domain-containing protein	IPR013210 (Leucine-rich repeat-containing N-terminal, plant-type), IPR032675 (Leucine-rich repeat domain, L domain-like)	GO:0000166, GO:0004672, GO:0004674, GO:0005524, GO:0006468, GO:0016020, GO:0016021, GO:0016301, GO:0016310, GO:0016740	0.933182	0.929231	Turquoise
TRINITY_DN2204_c0_g2	1.38146	1	-0.17959	1	tr|A0A446NNK4|A0A446NNK4_TRITD	***	Glycosyltransferase	IPR002213 (UDP-glucuronosyl/UDP-glucosyltransferase)	NA	0.906371	0.900365	Turquoise
TRINITY_DN22005_c0_g1	2.44899	0.774913	0.467347	1	NA	NA	NA	NA	NA	0.819959	0.832267	Turquoise
TRINITY_DN21977_c1_g1	6.28686	0.000836525	0	1	NA	NA	NA	NA	NA	0.824634	0.819418	Turquoise
TRINITY_DN21968_c1_g1	1.50388	1	-0.267617	1	NA	NA	Unknown protein	NA	NA	0.804007	0.8076	Turquoise
TRINITY_DN2196_c0_g1	0.727443	1	-0.57779	1	tr|M8BUP9|M8BUP9_AEGTA	***	Pentatricopeptide repeat-containing protein	IPR002885 (Pentatricopeptide repeat), IPR011990 (Tetratricopeptide-like helical domain)	NA	0.857025	0.852885	Turquoise
TRINITY_DN219501_c0_g1	3.59779	0.0869461	-2.45867	1	tr|B9ETF5|B9ETF5_ORYSJ	*-*	CCHC-type domain-containing protein	IPR025558 (Domain of unknown function DUF4283), IPR025836 (Zinc knuckle CX2CX4HX4C)	GO:0003676, GO:0004523, GO:0008270, GO:0090502	0.95151	0.947395	Turquoise
TRINITY_DN21950_c0_g2	2.58735	0.312412	0.329888	1	NA	NA	Unknown protein	NA	NA	0.846632	0.858203	Turquoise
TRINITY_DN21943_c0_g1	1.25246	1	0.184307	1	NA	NA	Unknown protein	NA	NA	0.817634	0.834268	Turquoise
TRINITY_DN2193_c32_g1	1.6164	0.00923469	0.70212	1	NA	NA	NA	NA	NA	0.919719	0.934651	Turquoise
TRINITY_DN2193_c0_g1	0.357932	1	-0.0141823	1	tr|A0A2G3D4H8|A0A2G3D4H8_CAPCH	*-*	Chlorophyll a-b binding protein, chloroplastic	IPR022796 (Chlorophyll A-B binding protein), IPR023329 (Chlorophyll a/b binding protein domain)	GO:0003676, GO:0008270, GO:0009507, GO:0009522, GO:0009523, GO:0009535, GO:0009536, GO:0009579, GO:0009765, GO:0015979, GO:0016020, GO:0016021, GO:0016168, GO:0018298	0.849673	0.851701	Turquoise
TRINITY_DN21927_c0_g2	1.87067	0.612093	0.50682	1	NA	NA	Unknown protein	NA	NA	0.817736	0.810246	Turquoise
TRINITY_DN2191_c5_g1	1.49308	1	0.914198	1	tr|Q2QPC2|Q2QPC2_ORYSJ	***	CsAtPR5, putative, expressed	NA	NA	0.791846	0.809684	Turquoise
TRINITY_DN2191_c0_g2	1.80956	0.329241	-0.362717	1	NA	NA	NA	NA	NA	0.847767	0.866355	Turquoise
TRINITY_DN2191_c0_g1	1.09024	1	0.233692	1	tr|A0A2S3GQ19|A0A2S3GQ19_9POAL	***	Glycos_transf_1 domain-containing protein	IPR001296 (Glycosyl transferase, family 1)	NA	0.787276	0.814071	Turquoise
TRINITY_DN21902_c0_g1	2.06644	0.337222	0.691401	1	NA	NA	NA	NA	NA	0.876593	0.875627	Turquoise
TRINITY_DN21885_c0_g1	5.68278	0.000259233	0.44414	1	NA	NA	NA	NA	NA	0.845038	0.822134	Turquoise
TRINITY_DN21853_c1_g1	2.72768	0.195801	1.48462	1	NA	NA	NA	NA	NA	0.811405	0.825373	Turquoise
TRINITY_DN2180_c0_g1	1.53913	0.662598	-0.226394	1	NA	NA	Unknown protein	NA	NA	0.854787	0.87176	Turquoise
TRINITY_DN218_c0_g2	1.77927	1	-0.233809	1	NA	NA	NA	NA	NA	0.806893	0.817689	Turquoise
TRINITY_DN21793_c0_g1	2.02859	1	-0.179671	1	NA	NA	Unknown protein	NA	NA	0.802	0.818278	Turquoise
TRINITY_DN21766_c0_g1	1.13928	1	-0.889914	1	NA	NA	NA	NA	NA	0.812637	0.827066	Turquoise
TRINITY_DN21762_c0_g1	0.609781	1	0.076673	1	tr|A0A287KRK1|A0A287KRK1_HORVV	***	MoCF_biosynth domain-containing protein	IPR001453 (MoaB/Mog domain), IPR014729 (Rossmann-like alpha/beta/alpha sandwich fold)	GO:0003824	0.9017	0.895369	Turquoise
TRINITY_DN21730_c0_g1	4.00157	0.511631	0.312008	1	NA	NA	NA	NA	NA	0.945423	0.949772	Turquoise
TRINITY_DN2170_c1_g2	4.17178	NA	2.75021	NA	tr|Q8H992|Q8H992_ORYSJ	***	Reverse transcriptase domain-containing protein	IPR000477 (Reverse transcriptase domain)	NA	0.828202	0.824341	Turquoise
TRINITY_DN21695_c0_g2	2.80788	1	1.08542	1	NA	NA	NA	NA	NA	0.83801	0.836995	Turquoise
TRINITY_DN21669_c0_g2	2.31362	0.191672	0.383226	1	NA	NA	Unknown protein	NA	NA	0.916152	0.926974	Turquoise
TRINITY_DN21667_c0_g1	10.7053	3.5e-21	0.54129	1	tr|A0A446NRK5|A0A446NRK5_TRITD	*-*	ULP_PROTEASE domain-containing protein	NA	NA	0.969216	0.967454	Turquoise
TRINITY_DN21659_c0_g1	1.597	0.475806	-0.272761	1	NA	NA	Unknown protein	NA	NA	0.936708	0.936137	Turquoise
TRINITY_DN2165_c0_g1	1.38852	0.80046	-0.280194	1	NA	NA	NA	NA	NA	0.921756	0.915355	Turquoise
TRINITY_DN21615_c0_g3	2.41288	0.283065	-1.59605	1	NA	NA	NA	NA	NA	0.955784	0.939277	Turquoise
TRINITY_DN21615_c0_g2	2.39624	0.259299	-1.45183	1	NA	NA	Unknown protein	NA	NA	0.927469	0.921065	Turquoise
TRINITY_DN21608_c0_g1	0.909933	1	-0.747179	1	NA	NA	NA	NA	NA	0.836689	0.844799	Turquoise
TRINITY_DN2160_c0_g1	-0.654065	1	-0.0649297	1	tr|A0A3B6DLW4|A0A3B6DLW4_WHEAT	***	Chloride channel protein	IPR001807 (Chloride channel, voltage gated)	NA	-0.828068	-0.811429	Turquoise
TRINITY_DN21557_c0_g1	2.22357	0.234302	-0.806802	1	NA	NA	Unknown protein	NA	NA	0.947178	0.951808	Turquoise
TRINITY_DN2153_c1_g1	1.68534	0.860807	0.341198	1	NA	NA	NA	NA	NA	0.865861	0.856669	Turquoise
TRINITY_DN2153_c0_g1	1.52236	0.443377	0.878313	1	NA	NA	Unknown protein	NA	NA	0.792316	0.800512	Turquoise
TRINITY_DN21527_c0_g2	3.07325	0.0299185	0.100537	1	NA	NA	NA	NA	NA	0.948434	0.951337	Turquoise
TRINITY_DN21520_c0_g1	8.19838	0.00135394	3.35366	1	NA	NA	NA	NA	NA	0.947809	0.952122	Turquoise
TRINITY_DN2152_c1_g1	2.93026	0.0259258	1.47319	1	sp|P69309|UBIQP_AVEFA	***	Polyubiquitin	IPR019956 (Ubiquitin), IPR029071 (Ubiquitin-related domain)	GO:0005634, GO:0005737	0.813437	0.813121	Turquoise
TRINITY_DN2152_c0_g2	-1.31474	0.396769	-0.454808	1	sp|P69309|UBIQP_AVEFA	***	Polyubiquitin	IPR019956 (Ubiquitin), IPR029071 (Ubiquitin-related domain)	GO:0005634, GO:0005737	-0.816981	-0.830666	Turquoise
TRINITY_DN21455_c0_g1	2.45148	0.0230147	-0.155631	1	NA	NA	NA	NA	NA	0.898072	0.881037	Turquoise
TRINITY_DN21433_c0_g1	3.86956	2.23e-05	1.12347	1	NA	NA	Unknown protein	NA	NA	0.883429	0.87647	Turquoise
TRINITY_DN21401_c0_g1	2.04282	0.223246	0.0259607	1	NA	NA	NA	NA	NA	0.938609	0.950091	Turquoise
TRINITY_DN21399_c2_g1	3.9191	0.0170285	1.68077	1	NA	NA	NA	NA	NA	0.90663	0.922648	Turquoise
TRINITY_DN21337_c0_g1	2.38119	0.64251	0.146743	1	NA	NA	NA	NA	NA	0.839893	0.832382	Turquoise
TRINITY_DN21317_c0_g1	-1.07389	1	0.000888112	1	tr|A0A3B6QJX7|A0A3B6QJX7_WHEAT	***	Rhomboid domain-containing protein	IPR022764 (Peptidase S54, rhomboid domain)	NA	-0.897319	-0.894075	Turquoise
TRINITY_DN2129_c0_g1	1.19097	1	0.405288	1	NA	NA	Unknown protein	NA	NA	0.873882	0.884283	Turquoise
TRINITY_DN21264_c0_g3	2.07485	0.886171	-1.23821	1	NA	NA	NA	NA	NA	0.842422	0.834324	Turquoise
TRINITY_DN21261_c1_g1	0.83022	1	-0.122183	1	tr|A0A0K9P8A5|A0A0K9P8A5_ZOSMR	***	Pathogenesis-related thaumatin-like protein	IPR001938 (Thaumatin)	NA	0.809155	0.807401	Turquoise
TRINITY_DN2126_c0_g1	1.67391	1	-0.602736	1	NA	NA	Unknown protein	NA	NA	0.902282	0.901628	Turquoise
TRINITY_DN21217_c0_g1	2.61065	0.353682	-0.317319	1	NA	NA	NA	NA	NA	0.938578	0.936185	Turquoise
TRINITY_DN21203_c0_g1	2.46931	0.173217	-0.123505	1	NA	NA	NA	NA	NA	0.841861	0.842978	Turquoise
TRINITY_DN21196_c0_g1	2.08763	0.431608	0.405248	1	NA	NA	NA	NA	NA	0.880987	0.885777	Turquoise
TRINITY_DN21150_c0_g1	4.81474	0.00345255	3.41971	0.356869	tr|A0A452YRD3|A0A452YRD3_AEGTS	*-*	Reverse transcriptase domain-containing protein	NA	NA	0.822873	0.832168	Turquoise
TRINITY_DN21145_c0_g3	3.41054	0.529111	-0.141153	1	NA	NA	Unknown protein	NA	NA	0.841596	0.822718	Turquoise
TRINITY_DN2113_c0_g1	0.448672	1	0.0749493	1	tr|I1HV65|I1HV65_BRADI	***	WD_REPEATS_REGION domain-containing protein	IPR011047 (Quinoprotein alcohol dehydrogenase-like superfamily), IPR015943 (WD40/YVTN repeat-like-containing domain), IPR020472 (G-protein beta WD-40 repeat)	GO:0031929, GO:0031931, GO:0031932, GO:0032008, GO:0032956	0.88426	0.903298	Turquoise
TRINITY_DN21096_c3_g1	1.84266	1	-1.58307	1	NA	NA	NA	NA	NA	0.819695	0.80023	Turquoise
TRINITY_DN21068_c0_g1	2.84265	0.250416	-2.20504	1	NA	NA	Unknown protein	NA	NA	0.867448	0.856212	Turquoise
TRINITY_DN21064_c0_g2	2.13468	0.0616744	1.10923	1	tr|A0A446T2Y1|A0A446T2Y1_TRITD	***	PHB domain-containing protein	IPR001107 (Band 7 domain)	NA	0.874911	0.88915	Turquoise
TRINITY_DN21058_c2_g1	3.86838	0.689131	-4.42697	1	tr|A0A0Q3FCY8|A0A0Q3FCY8_BRADI	*-*	CCHC-type domain-containing protein	NA	GO:0003676, GO:0008270	0.928873	0.932232	Turquoise
TRINITY_DN21057_c0_g2	2.16657	0.974986	-2.50099	1	NA	NA	NA	NA	NA	0.864109	0.867221	Turquoise
TRINITY_DN21046_c0_g2	0.961733	1	-0.0697932	1	NA	NA	Unknown protein	NA	NA	0.818864	0.828356	Turquoise
TRINITY_DN21045_c0_g1	0.826349	1	-0.321238	1	NA	NA	Unknown protein	NA	NA	0.844839	0.856828	Turquoise
TRINITY_DN21035_c0_g1	5.96335	0.00255329	0.552885	1	tr|A0A287JKK1|A0A287JKK1_HORVV	*-*	Receptor-like serine/threonine-protein kinase	IPR000858 (S-locus glycoprotein domain)	GO:0000166, GO:0004672, GO:0004674, GO:0005524, GO:0006468, GO:0016301, GO:0016310, GO:0016740, GO:0048544	0.85341	0.860271	Turquoise
TRINITY_DN21025_c0_g1	2.46446	0.000590184	1.4186	1	tr|M8C4F6|M8C4F6_AEGTA	***	Polyadenylate-binding protein 2	IPR012677 (Nucleotide-binding alpha-beta plait domain)	GO:0003676, GO:0003723	0.808809	0.80116	Turquoise
TRINITY_DN21013_c1_g1	5.98962	0.001667	2.63368	1	NA	NA	Unknown protein	NA	NA	0.919717	0.910033	Turquoise
TRINITY_DN21003_c0_g1	4.54283	0.0328544	0.0519366	1	NA	NA	NA	NA	NA	0.953236	0.955281	Turquoise
TRINITY_DN20989_c0_g1	-7.3885	6.76e-08	-0.757141	1	tr|Q94BM1|Q94BM1_HORVU	*-*	Gag-pol polyprotein	NA	GO:0003676, GO:0008270, GO:0015074	-0.787501	-0.811747	Turquoise
TRINITY_DN20975_c0_g1	5.97754	0.0014535	0	1	NA	NA	NA	NA	NA	0.887621	0.874849	Turquoise
TRINITY_DN20950_c1_g1	2.89465	0.0125378	0.921541	1	NA	NA	NA	NA	NA	0.942683	0.948947	Turquoise
TRINITY_DN20932_c0_g1	3.02943	0.0320309	1.1186	1	NA	NA	Unknown protein	NA	NA	0.880925	0.887195	Turquoise
TRINITY_DN20926_c0_g1	1.27258	1	-0.777159	1	NA	NA	Unknown protein	NA	NA	0.840631	0.826844	Turquoise
TRINITY_DN2091_c1_g1	0.520882	1	0.06649	1	tr|A0A0U3AAA6|A0A0U3AAA6_LOLPR	***	Two-component response regulator	IPR009057 (Homeobox domain-like), IPR011006 (CheY-like superfamily), IPR017053 (Response regulator B-type, plant)	GO:0000160, GO:0003677, GO:0003700, GO:0005634, GO:0006355, GO:0007165	0.854042	0.850878	Turquoise
TRINITY_DN20880_c0_g1	-4.75834	0.0247392	0.251386	1	tr|A0A287JUL9|A0A287JUL9_HORVV	*-*	Protein kinase domain-containing protein	IPR011009 (Protein kinase-like domain)	GO:0004672, GO:0005524, GO:0006468	-0.905948	-0.886831	Turquoise
TRINITY_DN20853_c0_g1	5.6938	0.00143827	2.47442	1	NA	NA	Unknown protein	NA	NA	0.878318	0.884799	Turquoise
TRINITY_DN20852_c0_g1	1.80732	0.918262	-0.19043	1	NA	NA	NA	NA	NA	0.856501	0.866067	Turquoise
TRINITY_DN20810_c0_g1	0.991489	1	-0.0325527	1	NA	NA	Unknown protein	NA	NA	0.807705	0.802899	Turquoise
TRINITY_DN20776_c0_g1	-2.43381	0.103493	-0.389877	1	NA	NA	NA	NA	NA	-0.823187	-0.826581	Turquoise
TRINITY_DN2076_c0_g1	1.30946	0.625368	-0.0977489	1	NA	NA	Unknown protein	NA	NA	0.95094	0.957124	Turquoise
TRINITY_DN20757_c0_g1	2.22952	0.385592	0.846649	1	NA	NA	NA	NA	NA	0.786719	0.803294	Turquoise
TRINITY_DN20736_c0_g2	7.5856	0.011225	3.75539	1	NA	NA	Unknown protein	NA	NA	0.927034	0.932995	Turquoise
TRINITY_DN20736_c0_g1	8.93721	9.49e-12	0	1	NA	NA	Unknown protein	NA	NA	0.896695	0.910861	Turquoise
TRINITY_DN20733_c0_g1	2.52296	0.0824838	1.00061	1	NA	NA	NA	NA	NA	0.870068	0.885431	Turquoise
TRINITY_DN2073_c1_g1	-1.584	0.670358	-0.146438	1	tr|I1IQT3|I1IQT3_BRADI	*-*	Abhydrolase_3 domain-containing protein	IPR029058 (Alpha/Beta hydrolase fold)	GO:0016020, GO:0016021, GO:0016787	-0.794584	-0.804984	Turquoise
TRINITY_DN20704_c0_g1	3.49664	0.180209	-2.54773	1	tr|A0A0Q3PTU5|A0A0Q3PTU5_BRADI	***	F-box domain-containing protein	NA	NA	0.913384	0.902571	Turquoise
TRINITY_DN20689_c1_g1	3.33774	0.0457423	1.59011	1	tr|A0A287L8U5|A0A287L8U5_HORVV	***	Iron-sulfur cluster assembly protein	IPR002871 (NIF system FeS cluster assembly, NifU, N-terminal)	GO:0005506, GO:0005739, GO:0005759, GO:0016226, GO:0046872, GO:0051536, GO:0051537	0.872643	0.884763	Turquoise
TRINITY_DN20651_c3_g1	4.28258	0.0617192	1.22779	1	NA	NA	Unknown protein	NA	NA	0.835669	0.840061	Turquoise
TRINITY_DN20615_c0_g2	6.85771	0.000629747	2.76055	1	NA	NA	NA	NA	NA	0.861683	0.843322	Turquoise
TRINITY_DN20597_c0_g1	8.08097	0.00902746	-0.581159	1	NA	NA	Unknown protein	NA	NA	0.837053	0.836719	Turquoise
TRINITY_DN205833_c0_g1	2.91348	1	-5.35345	0.841999	NA	NA	Unknown protein	NA	NA	0.828698	0.808984	Turquoise
TRINITY_DN2058_c0_g1	2.9473	2.44e-13	0.583705	1	tr|A0A287UZ66|A0A287UZ66_HORVV	***	RING-type domain-containing protein	IPR013083 (Zinc finger, RING/FYVE/PHD-type)	NA	0.917027	0.9234	Turquoise
TRINITY_DN20495_c0_g1	1.68176	0.876648	-0.538383	1	NA	NA	NA	NA	NA	0.856986	0.857179	Turquoise
TRINITY_DN20430_c0_g2	1.7295	1	-1.82682	1	NA	NA	NA	NA	NA	0.814251	0.821921	Turquoise
TRINITY_DN20422_c1_g1	6.28783	0.000294404	1.70176	1	NA	NA	Unknown protein	NA	NA	0.857547	0.870507	Turquoise
TRINITY_DN20384_c0_g1	2.88322	0.70357	-0.405171	1	NA	NA	NA	NA	NA	0.861176	0.85352	Turquoise
TRINITY_DN20380_c0_g1	2.71947	0.456199	0.192981	1	NA	NA	NA	NA	NA	0.793882	0.805973	Turquoise
TRINITY_DN20369_c0_g1	3.56036	0.0855413	1.51656	1	NA	NA	NA	NA	NA	0.871267	0.879594	Turquoise
TRINITY_DN20358_c0_g1	1.73936	1	-0.961495	1	tr|A0A0D9X6Y1|A0A0D9X6Y1_9ORYZ	*-*	HTH TFE/IIEalpha-type domain-containing protein	IPR002853 (Transcription initiation factor IIE subunit alpha, N-terminal)	GO:0006367, GO:0043565	0.896964	0.876223	Turquoise
TRINITY_DN20350_c0_g1	1.87533	0.835499	0.606077	1	tr|A0A446PH33|A0A446PH33_TRITD	*-*	PMD domain-containing protein	IPR019557 (Aminotransferase-like, plant mobile domain)	NA	0.791293	0.809332	Turquoise
TRINITY_DN20343_c0_g1	3.27273	0.189962	-1.57828	1	NA	NA	NA	NA	NA	0.898918	0.900048	Turquoise
TRINITY_DN20330_c0_g1	3.9315	0.00363472	-0.867819	1	NA	NA	NA	NA	NA	0.908548	0.907919	Turquoise
TRINITY_DN2031_c0_g2	-0.995632	1	-0.00430823	1	tr|A0A076G3L0|A0A076G3L0_9POAL	***	Flavonoid 3'-hydroxylase	IPR001128 (Cytochrome P450)	GO:0004497, GO:0005506, GO:0016020, GO:0016021, GO:0016491, GO:0016705, GO:0020037, GO:0046872, GO:0055114	-0.864974	-0.862748	Turquoise
TRINITY_DN2031_c0_g1	-2.5472	0.00148222	0.161328	1	tr|Q0Z7U9|Q0Z7U9_SORBI	***	Flavonoid 3'-hydroxylase	IPR001128 (Cytochrome P450)	GO:0004497, GO:0005506, GO:0016491, GO:0016705, GO:0020037, GO:0046872, GO:0055114	-0.824261	-0.80996	Turquoise
TRINITY_DN20309_c0_g1	2.53718	0.390798	-0.922373	1	NA	NA	NA	NA	NA	0.848908	0.842107	Turquoise
TRINITY_DN20206_c0_g1	6.36824	0.00163173	3.95434	0.550065	NA	NA	NA	NA	NA	0.9191	0.921936	Turquoise
TRINITY_DN20192_c0_g2	1.58075	0.454686	0.500453	1	tr|A0A287VLF0|A0A287VLF0_HORVV	*-*	Fe2OG dioxygenase domain-containing protein	IPR005123 (Oxoglutarate/iron-dependent dioxygenase), IPR027443 (Isopenicillin N synthase-like)	GO:0016491, GO:0046872, GO:0055114	0.918493	0.905279	Turquoise
TRINITY_DN20184_c0_g2	2.47184	0.102629	0.287456	1	tr|R7WFT9|R7WFT9_AEGTA	*-*	Cysteine-rich receptor-like protein kinase 10	NA	GO:0004672, GO:0005524, GO:0006468, GO:0016301, GO:0016310	0.896725	0.894328	Turquoise
TRINITY_DN20151_c0_g1	-4.14094	0.0327692	0.712884	1	tr|I1GUE9|I1GUE9_BRADI	*-*	Ribosomal_S10 domain-containing protein	NA	GO:0003735, GO:0005739, GO:0005840, GO:0006412	-0.80302	-0.803205	Turquoise
TRINITY_DN20144_c0_g1	2.87049	0.391924	-0.526832	1	NA	NA	NA	NA	NA	0.905007	0.908093	Turquoise
TRINITY_DN20127_c0_g1	3.85504	0.121567	1.02445	1	NA	NA	NA	NA	NA	0.87986	0.862622	Turquoise
TRINITY_DN2012_c1_g1	0.92031	1	0.0523889	1	tr|A0A446L7M9|A0A446L7M9_TRITD	*-*	Protein kinase domain-containing protein	IPR011009 (Protein kinase-like domain)	NA	0.80756	0.826614	Turquoise
TRINITY_DN20116_c0_g4	1.98087	0.912437	-5.883	0.00498382	NA	NA	NA	NA	NA	0.880209	0.889974	Turquoise
TRINITY_DN20116_c0_g1	1.39182	1	-2.67444	0.775257	NA	NA	Unknown protein	NA	NA	0.810313	0.815338	Turquoise
TRINITY_DN20104_c0_g1	1.76341	1	-0.390566	1	tr|A0A453LRU1|A0A453LRU1_AEGTS	***	F-box domain-containing protein	NA	NA	0.829759	0.826563	Turquoise
TRINITY_DN20078_c0_g2	1.78599	0.652186	0.266771	1	tr|A0A3B6U3U7|A0A3B6U3U7_WHEAT	***	Flavin-containing monooxygenase	IPR020946 (Flavin monooxygenase-like), IPR023753 (FAD/NAD(P)-binding domain)	NA	0.875672	0.89009	Turquoise
TRINITY_DN20057_c0_g1	2.62099	0.0745728	-0.399487	1	tr|A0A1D6DU73|A0A1D6DU73_MAIZE	***	EH domain-containing protein 1	IPR011992 (EF-hand domain pair), IPR022812 (Dynamin superfamily), IPR027417 (P-loop containing nucleoside triphosphate hydrolase), IPR031692 (EH domain-containing protein, N-terminal)	GO:0005509, GO:0005525	0.825276	0.816008	Turquoise
TRINITY_DN20051_c0_g2	1.11131	1	-2.15563	1	NA	NA	Unknown protein	NA	NA	0.814326	0.805603	Turquoise
TRINITY_DN19991_c0_g1	1.02348	1	-3.12631	0.240534	tr|I1I8L7|I1I8L7_BRADI	*-*	CASP-like protein	NA	GO:0005886, GO:0016020, GO:0016021	0.809189	0.800387	Turquoise
TRINITY_DN1999_c0_g1	1.42848	0.227384	0.808299	1	NA	NA	Unknown protein	NA	NA	0.851056	0.863787	Turquoise
TRINITY_DN1994_c1_g1	2.02172	0.0893523	-0.0199159	1	NA	NA	NA	NA	NA	0.788177	0.818082	Turquoise
TRINITY_DN1993_c0_g1	4.89061	0.00366815	0.411482	1	NA	NA	Unknown protein	NA	NA	0.929727	0.911504	Turquoise
TRINITY_DN19913_c0_g1	2.37326	0.575233	-0.16664	1	tr|R7WE26|R7WE26_AEGTA	*-*	Formamidase	IPR004304 (Acetamidase/Formamidase)	GO:0016811	0.833439	0.830987	Turquoise
TRINITY_DN1989_c0_g1	1.31975	0.216751	0.813845	1	sp|Q195N6|PDRP1_MAIZE	***	Pyruvate, phosphate dikinase regulatory protein, chloroplastic	IPR005177 (Bifunctional kinase-pyrophosphorylase)	GO:0000166, GO:0004674, GO:0005524, GO:0006468, GO:0009507, GO:0009536, GO:0009570, GO:0016301, GO:0016310, GO:0016740, GO:0016772, GO:0016776	0.798915	0.814317	Turquoise
TRINITY_DN19885_c0_g1	2.02679	0.451308	-1.58573	1	NA	NA	NA	NA	NA	0.895103	0.881828	Turquoise
TRINITY_DN19870_c0_g1	0.276756	1	-0.0402929	1	tr|T1MHX1|T1MHX1_TRIUA	***	t-SNARE coiled-coil homology domain-containing protein	IPR000727 (Target SNARE coiled-coil homology domain)	GO:0015031, GO:0016020, GO:0016021, GO:0030173	0.863478	0.869547	Turquoise
TRINITY_DN19836_c0_g1	1.89637	0.873875	-0.708414	1	NA	NA	Unknown protein	NA	NA	0.847387	0.842813	Turquoise
TRINITY_DN19834_c0_g1	1.06967	1	-0.207284	1	tr|A0A446WTP5|A0A446WTP5_TRITD	*-*	F-box domain-containing protein	NA	NA	0.821346	0.83244	Turquoise
TRINITY_DN19802_c0_g1	4.30826	0.0417492	-2.90698	1	NA	NA	NA	NA	NA	0.831622	0.834803	Turquoise
TRINITY_DN19784_c0_g1	2.48147	0.192	0.495096	1	NA	NA	Unknown protein	NA	NA	0.931904	0.938306	Turquoise
TRINITY_DN19765_c1_g1	9.17464	3.76e-10	7.15499	2.97e-05	NA	NA	Unknown protein	NA	NA	0.80271	0.803494	Turquoise
TRINITY_DN19735_c1_g1	2.34269	0.919165	-7.83118	0.000239178	NA	NA	Unknown protein	NA	NA	0.882689	0.87493	Turquoise
TRINITY_DN1971_c0_g1	4.35032	0.178704	2.2736	1	tr|A0A287GTV2|A0A287GTV2_HORVV	*-*	Protein kinase domain-containing protein	IPR011009 (Protein kinase-like domain)	GO:0004672, GO:0005524, GO:0006468	0.927683	0.929265	Turquoise
TRINITY_DN19673_c0_g1	3.8625	2.1e-05	1.8691	1	tr|A0A446WQK4|A0A446WQK4_TRITD	***	F-box domain-containing protein	IPR001810 (F-box domain), IPR032675 (Leucine-rich repeat domain, L domain-like)	NA	0.866559	0.871354	Turquoise
TRINITY_DN19671_c0_g2	2.06897	0.641489	0.300548	1	NA	NA	NA	NA	NA	0.831596	0.85164	Turquoise
TRINITY_DN19664_c2_g1	2.47494	0.819703	-3.63485	0.806377	NA	NA	Unknown protein	NA	NA	0.87291	0.864474	Turquoise
TRINITY_DN19657_c1_g3	5.04961	0.0180028	1.67768	1	NA	NA	NA	NA	NA	0.933029	0.933643	Turquoise
TRINITY_DN19634_c0_g1	-6.13644	9.05e-05	0.0333189	1	NA	NA	NA	NA	NA	-0.793925	-0.802895	Turquoise
TRINITY_DN19628_c0_g1	1.73973	1	-1.23807	1	NA	NA	NA	NA	NA	0.882929	0.856311	Turquoise
TRINITY_DN19590_c1_g1	4.02234	0.00738316	-2.53195	1	NA	NA	NA	NA	NA	0.963685	0.956354	Turquoise
TRINITY_DN19589_c0_g2	3.22996	0.0421438	1.45303	1	NA	NA	NA	NA	NA	0.8804	0.892327	Turquoise
TRINITY_DN19589_c0_g1	1.00205	1	0.0418829	1	tr|G7J1I4|G7J1I4_MEDTR	*-*	NB-ARC domain disease resistance protein	IPR032675 (Leucine-rich repeat domain, L domain-like)	GO:0043531	0.803007	0.803921	Turquoise
TRINITY_DN19563_c0_g1	3.69494	0.0226238	1.5306	1	NA	NA	Unknown protein	NA	NA	0.797639	0.80189	Turquoise
TRINITY_DN19555_c0_g1	7.04023	5.06e-06	2.66193	1	NA	NA	NA	NA	NA	0.929217	0.92336	Turquoise
TRINITY_DN19546_c0_g1	3.32234	0.146119	1.21296	1	NA	NA	NA	NA	NA	0.812815	0.812855	Turquoise
TRINITY_DN19511_c0_g1	3.77224	0.0602212	-2.60657	1	NA	NA	NA	NA	NA	0.946875	0.954969	Turquoise
TRINITY_DN195_c1_g1	-0.421423	1	-0.0180327	1	tr|A0A4D6KJ64|A0A4D6KJ64_VIGUN	***	Homeobox-leucine zipper protein	IPR009057 (Homeobox domain-like), IPR013978 (MEKHLA), IPR023393 (START-like domain)	NA	-0.897192	-0.877877	Turquoise
TRINITY_DN19493_c0_g2	2.98178	0.335273	-1.09195	1	NA	NA	NA	NA	NA	0.828944	0.824953	Turquoise
TRINITY_DN19493_c0_g1	6.09496	0.00407285	2.34506	1	NA	NA	NA	NA	NA	0.827052	0.852572	Turquoise
TRINITY_DN19478_c0_g2	3.08172	0.260698	1.41696	1	NA	NA	Unknown protein	NA	NA	0.845314	0.843743	Turquoise
TRINITY_DN19470_c1_g1	3.75502	0.017043	2.1148	1	NA	NA	NA	NA	NA	0.878981	0.891279	Turquoise
TRINITY_DN194678_c0_g1	6.55254	3.03e-06	4.77665	0.0186762	NA	NA	NA	NA	NA	0.911888	0.933296	Turquoise
TRINITY_DN1946_c0_g1	0.897053	1	0.414882	1	tr|B4FH48|B4FH48_MAIZE	*-*	Mitochondrial transcription termination factor family protein	IPR003690 (Transcription termination factor, mitochondrial/chloroplastic)	GO:0003690, GO:0006355, GO:0009507, GO:0009658, GO:0032502	0.822031	0.836913	Turquoise
TRINITY_DN19453_c0_g1	2.36709	0.433928	0.467125	1	NA	NA	Unknown protein	NA	NA	0.799426	0.820943	Turquoise
TRINITY_DN19422_c0_g1	-2.33373	0.037654	-0.166426	1	tr|A0A446LYB7|A0A446LYB7_TRITD	***	F-box domain-containing protein	IPR001810 (F-box domain), IPR032675 (Leucine-rich repeat domain, L domain-like)	NA	-0.872615	-0.870182	Turquoise
TRINITY_DN19383_c0_g1	6.346	7.56e-05	3.89288	0.316689	tr|A0A446KN63|A0A446KN63_TRITD	*-*	DNA polymerase	NA	NA	0.921644	0.92106	Turquoise
TRINITY_DN19375_c0_g2	3.52255	0.110136	-0.49192	1	NA	NA	NA	NA	NA	0.9629	0.958838	Turquoise
TRINITY_DN19346_c0_g2	6.57131	6.36e-05	0	1	NA	NA	NA	NA	NA	0.922719	0.921434	Turquoise
TRINITY_DN19324_c0_g1	2.95236	0.0855215	1.24128	1	tr|A0A1W0W388|A0A1W0W388_SORBI	*-*	Protein kinase domain-containing protein	IPR011009 (Protein kinase-like domain), IPR013320 (Concanavalin A-like lectin/glucanase domain)	GO:0004672, GO:0005509, GO:0005524, GO:0006468, GO:0016020, GO:0016021, GO:0030247	0.83994	0.870761	Turquoise
TRINITY_DN19314_c0_g1	1.76466	0.914252	0.117841	1	tr|A0A446R6I8|A0A446R6I8_TRITD	***	WD_REPEATS_REGION domain-containing protein	IPR015943 (WD40/YVTN repeat-like-containing domain)	NA	0.820038	0.819416	Turquoise
TRINITY_DN19276_c0_g1	1.41264	0.705487	-0.0301521	1	NA	NA	NA	NA	NA	0.908558	0.885146	Turquoise
TRINITY_DN19203_c0_g1	3.94784	0.00983006	-3.32758	0.833723	NA	NA	NA	NA	NA	0.96452	0.972897	Turquoise
TRINITY_DN192_c0_g2	-1.29496	1	0.185848	1	tr|A0A446IIT3|A0A446IIT3_TRITD	*-*	Protein kinase domain-containing protein	IPR011009 (Protein kinase-like domain), IPR013320 (Concanavalin A-like lectin/glucanase domain)	NA	-0.860237	-0.849807	Turquoise
TRINITY_DN192_c0_g1	1.57442	0.00656077	0.63025	1	tr|A0A3B6AQ48|A0A3B6AQ48_WHEAT	***	Protein kinase domain-containing protein	IPR011009 (Protein kinase-like domain)	NA	0.928388	0.935189	Turquoise
TRINITY_DN19195_c0_g1	1.30271	0.930392	0.269103	1	tr|F2DV13|F2DV13_HORVV	***	WAT1-related protein	IPR000620 (EamA domain), IPR030184 (WAT1-related protein)	GO:0016020, GO:0016021, GO:0022857, GO:0055085	0.929842	0.926283	Turquoise
TRINITY_DN191909_c0_g1	4.47	0.0769845	1.65418	1	tr|B9F2E0|B9F2E0_ORYSJ	*-*	Protein kinase domain-containing protein	NA	GO:0003676, GO:0004672, GO:0005524, GO:0006468, GO:0007166, GO:0008270	0.817564	0.820109	Turquoise
TRINITY_DN1919_c0_g2	0.494258	1	-0.105324	1	tr|A0A3B5Y000|A0A3B5Y000_WHEAT	***	PH domain-containing protein	IPR000648 (Oxysterol-binding protein), IPR011993 (PH domain-like)	NA	0.816113	0.804367	Turquoise
TRINITY_DN191671_c0_g1	1.59446	0.997421	0.463201	1	NA	NA	NA	NA	NA	0.826125	0.831462	Turquoise
TRINITY_DN19163_c0_g3	1.7911	0.539446	0.243928	1	NA	NA	Unknown protein	NA	NA	0.839282	0.823879	Turquoise
TRINITY_DN191384_c0_g1	2.18458	0.841178	-3.7869	0.507759	tr|A0A2U1KEJ6|A0A2U1KEJ6_ARTAN	*-*	C3H1-type domain-containing protein	NA	GO:0000943, GO:0046872	0.850223	0.844671	Turquoise
TRINITY_DN19130_c0_g3	2.84879	0.428958	-0.218017	1	NA	NA	NA	NA	NA	0.861617	0.866501	Turquoise
TRINITY_DN19119_c1_g1	-5.97782	0.000162062	0.645042	1	tr|M7YVG0|M7YVG0_TRIUA	*-*	ABC transporter C family member 10	IPR011527 (ABC transporter type 1, transmembrane domain), IPR027417 (P-loop containing nucleoside triphosphate hydrolase)	GO:0000166, GO:0005524, GO:0016020, GO:0016021, GO:0016887, GO:0042626, GO:0055085	-0.833982	-0.819295	Turquoise
TRINITY_DN1909_c1_g1	1.0718	1	-0.0748351	1	NA	NA	Unknown protein	NA	NA	0.907195	0.911192	Turquoise
TRINITY_DN1907_c2_g1	2.26706	0.271275	0.694936	1	NA	NA	Unknown protein	NA	NA	0.91195	0.916263	Turquoise
TRINITY_DN19066_c0_g1	2.63228	0.0451761	-0.385082	1	NA	NA	Unknown protein	NA	NA	0.980484	0.979983	Turquoise
TRINITY_DN19031_c0_g1	1.30275	1	0.249979	1	NA	NA	Unknown protein	NA	NA	0.840357	0.860405	Turquoise
TRINITY_DN19028_c0_g1	9.09235	1.15e-12	0	1	tr|Q7XEH6|Q7XEH6_ORYSJ	*-*	CAF1 family ribonuclease containing protein	IPR006941 (Ribonuclease CAF1), IPR012337 (Ribonuclease H-like domain)	GO:0003676, GO:0004535, GO:0030014, GO:0090503	0.907953	0.918361	Turquoise
TRINITY_DN19026_c0_g1	1.70227	1	-3.03969	0.456575	tr|A0A3B6QNH2|A0A3B6QNH2_WHEAT	***	F-box domain-containing protein	IPR001810 (F-box domain), IPR032675 (Leucine-rich repeat domain, L domain-like)	NA	0.822694	0.804552	Turquoise
TRINITY_DN1901_c0_g4	5.13656	0.000110735	-2.17286	1	NA	NA	NA	NA	NA	0.966596	0.955547	Turquoise
TRINITY_DN1901_c0_g1	6.66056	6.79e-10	-1.85959	1	tr|A0A438F5W4|A0A438F5W4_VITVI	***	Retrovirus-related Pol polyprotein from transposon TNT 1-94	IPR013103 (Reverse transcriptase, RNA-dependent DNA polymerase)	NA	0.976608	0.96664	Turquoise
TRINITY_DN19008_c0_g1	1.85037	0.447353	0.158816	1	NA	NA	NA	NA	NA	0.854182	0.87219	Turquoise
TRINITY_DN1900_c1_g1	1.96858	0.328884	0.512964	1	NA	NA	Unknown protein	NA	NA	0.942322	0.941379	Turquoise
TRINITY_DN18973_c0_g1	3.70086	4.09e-06	1.56891	1	NA	NA	NA	NA	NA	0.957354	0.966498	Turquoise
TRINITY_DN18942_c0_g1	2.374	1	-1.32272	1	NA	NA	NA	NA	NA	0.885203	0.877457	Turquoise
TRINITY_DN18932_c1_g3	7.35506	4.46e-25	0.131415	1	NA	NA	NA	NA	NA	0.926214	0.934358	Turquoise
TRINITY_DN18891_c0_g1	2.90264	0.0951883	-0.301671	1	NA	NA	NA	NA	NA	0.966493	0.972416	Turquoise
TRINITY_DN18876_c0_g1	1.58033	1	-0.630709	1	NA	NA	NA	NA	NA	0.87446	0.887125	Turquoise
TRINITY_DN18768_c0_g1	-1.75519	0.350079	-0.273349	1	tr|D7SZ96|D7SZ96_VITVI	***	Histone H3	IPR000164 (Histone H3/CENP-A), IPR009072 (Histone-fold)	GO:0000786, GO:0003677, GO:0005634, GO:0005694, GO:0006334, GO:0031492, GO:0046982	-0.835572	-0.834396	Turquoise
TRINITY_DN18760_c0_g2	1.01084	1	-0.567957	1	NA	NA	Unknown protein	NA	NA	0.889382	0.887756	Turquoise
TRINITY_DN18745_c0_g3	3.00964	0.169399	-2.4512	1	tr|A0A453T368|A0A453T368_AEGTS	*-*	Protein DETOXIFICATION	IPR002528 (Multi antimicrobial extrusion protein)	NA	0.828087	0.819769	Turquoise
TRINITY_DN1873_c2_g1	1.60119	0.86236	-5.47203	0.00135072	NA	NA	NA	NA	NA	0.898835	0.892114	Turquoise
TRINITY_DN18728_c0_g1	3.56088	0.912992	0.318441	1	NA	NA	NA	NA	NA	0.90602	0.908148	Turquoise
TRINITY_DN18694_c1_g1	4.11132	8.75e-05	1.32279	1	NA	NA	Unknown protein	NA	NA	0.878766	0.884854	Turquoise
TRINITY_DN18690_c0_g1	3.30273	0.0989706	0.276758	1	NA	NA	NA	NA	NA	0.817132	0.8062	Turquoise
TRINITY_DN18633_c1_g1	1.4024	1	-5.96794	0.0017377	NA	NA	Unknown protein	NA	NA	0.835676	0.819869	Turquoise
TRINITY_DN18630_c0_g2	4.41242	0.418992	1.67891	1	NA	NA	Unknown protein	NA	NA	0.930834	0.925572	Turquoise
TRINITY_DN18626_c0_g1	-3.34095	0.000298996	0.130266	1	NA	NA	NA	NA	NA	-0.840934	-0.828435	Turquoise
TRINITY_DN18616_c0_g1	1.79743	0.469807	-0.0734936	1	sp|Q9AXT8|CMT1_MAIZE	*-*	DNA (cytosine-5)-methyltransferase 1	IPR001025 (Bromo adjacent homology (BAH) domain), IPR016197 (Chromo domain-like), IPR029063 (S-adenosyl-L-methionine-dependent methyltransferase)	GO:0003677, GO:0003682, GO:0003886, GO:0005634, GO:0006325, GO:0008168, GO:0010216, GO:0010424, GO:0016740, GO:0032259, GO:0090116	0.887639	0.86963	Turquoise
TRINITY_DN18614_c0_g1	0.661357	1	0.125738	1	tr|A0A3B6JNM6|A0A3B6JNM6_WHEAT	***	Glyco_hyd_65N_2 domain-containing protein	IPR008928 (Six-hairpin glycosidase-like), IPR027414 (Glycosyl hydrolase family, N-terminal domain)	NA	0.842601	0.847658	Turquoise
TRINITY_DN18587_c0_g1	1.50691	1	-0.759385	1	NA	NA	NA	NA	NA	0.916739	0.900088	Turquoise
TRINITY_DN18573_c1_g1	7.49925	3.97e-25	-2.61304	1	NA	NA	NA	NA	NA	0.939331	0.946533	Turquoise
TRINITY_DN1857_c0_g2	2.1215	0.626059	0.137187	1	NA	NA	Unknown protein	NA	NA	0.917596	0.916334	Turquoise
TRINITY_DN18562_c0_g1	2.90257	1	0.243847	1	NA	NA	Unknown protein	NA	NA	0.88889	0.88954	Turquoise
TRINITY_DN18510_c0_g1	10.0961	4.98e-21	-0.986939	1	NA	NA	NA	NA	NA	0.933398	0.946646	Turquoise
TRINITY_DN18502_c0_g1	3.53579	0.00424868	1.39089	1	NA	NA	Unknown protein	NA	NA	0.933909	0.935704	Turquoise
TRINITY_DN18488_c0_g1	2.00734	0.900902	-0.31423	1	tr|A0A1E5V004|A0A1E5V004_9POAL	*-*	C2 and GRAM domain-containing protein	NA	GO:0016020, GO:0016021	0.837002	0.83638	Turquoise
TRINITY_DN18446_c0_g2	1.13732	1	0.0491232	1	tr|A0A3B6QPJ1|A0A3B6QPJ1_WHEAT	***	NB-ARC domain-containing protein	IPR027417 (P-loop containing nucleoside triphosphate hydrolase)	NA	0.822081	0.820116	Turquoise
TRINITY_DN1843_c6_g1	9.62397	0.00148843	7.61479	0.0840828	NA	NA	NA	NA	NA	0.8702	0.872394	Turquoise
TRINITY_DN18423_c1_g1	3.7203	0.181612	-0.241671	1	NA	NA	Unknown protein	NA	NA	0.983265	0.980495	Turquoise
TRINITY_DN18414_c0_g3	5.10662	9.73e-05	1.22105	1	NA	NA	Unknown protein	NA	NA	0.971098	0.973766	Turquoise
TRINITY_DN18411_c0_g2	2.09452	0.78659	0.00145838	1	NA	NA	NA	NA	NA	0.818412	0.812037	Turquoise
TRINITY_DN18406_c0_g3	2.7439	0.27987	-0.856296	1	NA	NA	Unknown protein	NA	NA	0.919813	0.920813	Turquoise
TRINITY_DN18406_c0_g1	3.01669	0.14581	-0.655997	1	NA	NA	Unknown protein	NA	NA	0.941527	0.93835	Turquoise
TRINITY_DN184_c2_g1	2.75351	0.671494	-0.292164	1	NA	NA	NA	NA	NA	0.86606	0.868011	Turquoise
TRINITY_DN18381_c0_g1	3.33616	3.15e-07	1.65634	1	NA	NA	Unknown protein	NA	NA	0.907076	0.89864	Turquoise
TRINITY_DN18352_c1_g2	2.7145	0.943998	-3.69178	0.880037	NA	NA	Unknown protein	NA	NA	0.899036	0.909742	Turquoise
TRINITY_DN1835_c1_g1	1.97664	0.0799385	0.487436	1	tr|F2DBT3|F2DBT3_HORVV	***	Protein DETOXIFICATION	IPR002528 (Multi antimicrobial extrusion protein)	GO:0006855, GO:0015238, GO:0015297, GO:0016020, GO:0016021, GO:0055085	0.920827	0.928507	Turquoise
TRINITY_DN183_c1_g1	-1.73611	0.0602212	-0.019498	1	tr|A0A446KB44|A0A446KB44_TRITD	***	F-box domain-containing protein	IPR001810 (F-box domain)	NA	-0.924542	-0.934231	Turquoise
TRINITY_DN18281_c0_g2	5.62866	0.146021	2.94728	1	NA	NA	Unknown protein	NA	NA	0.871793	0.883941	Turquoise
TRINITY_DN18280_c0_g1	1.77042	1	-1.82834	1	NA	NA	NA	NA	NA	0.889886	0.878037	Turquoise
TRINITY_DN18246_c1_g1	3.78782	0.0161943	-0.633964	1	NA	NA	NA	NA	NA	0.85983	0.868104	Turquoise
TRINITY_DN18237_c0_g1	4.0914	8.4e-05	-1.13534	1	NA	NA	Unknown protein	NA	NA	0.976116	0.970067	Turquoise
TRINITY_DN18236_c0_g1	1.65708	0.589077	0.747875	1	NA	NA	Unknown protein	NA	NA	0.812593	0.819935	Turquoise
TRINITY_DN18228_c1_g1	1.46651	1	-0.106449	1	NA	NA	NA	NA	NA	0.857378	0.838618	Turquoise
TRINITY_DN18216_c0_g1	3.17272	0.0515097	0.505185	1	NA	NA	NA	NA	NA	0.912325	0.926809	Turquoise
TRINITY_DN18163_c0_g1	0.258682	1	-0.07092	1	tr|A0A3B5XYR3|A0A3B5XYR3_WHEAT	***	Malic enzyme	IPR001891 (Malic oxidoreductase)	NA	0.810524	0.810371	Turquoise
TRINITY_DN1814_c0_g2	1.70109	0.331031	-0.357244	1	tr|A0A3B6QA32|A0A3B6QA32_WHEAT	*-*	Protein kinase domain-containing protein	IPR025287 (Wall-associated receptor kinase, galacturonan-binding domain)	NA	0.913264	0.917304	Turquoise
TRINITY_DN18100_c0_g3	0.831627	1	-0.388622	1	tr|A0A1E5VR03|A0A1E5VR03_9POAL	***	Pentatricopeptide repeat-containing protein	IPR002885 (Pentatricopeptide repeat)	NA	0.93163	0.919959	Turquoise
TRINITY_DN1810_c1_g3	1.18349	1	-0.340011	1	tr|A0A061DTU0|A0A061DTU0_THECC	***	Cytochrome P450 family protein	IPR001128 (Cytochrome P450)	GO:0005506, GO:0016020, GO:0016021, GO:0016705, GO:0020037, GO:0055114	0.87882	0.874252	Turquoise
TRINITY_DN18095_c1_g2	3.05236	0.152168	0.825223	1	NA	NA	NA	NA	NA	0.874567	0.863708	Turquoise
TRINITY_DN180949_c0_g2	6.07468	0.0358567	2.25894	1	NA	NA	NA	NA	NA	0.963587	0.968709	Turquoise
TRINITY_DN1808_c0_g1	0.769699	1	-0.468387	1	NA	NA	Unknown protein	NA	NA	0.877274	0.863778	Turquoise
TRINITY_DN180715_c0_g1	3.9137	0.100914	-0.263482	1	NA	NA	NA	NA	NA	0.821205	0.817703	Turquoise
TRINITY_DN18042_c0_g1	5.2253	0.0138731	1.8615	1	NA	NA	NA	NA	NA	0.811008	0.807415	Turquoise
TRINITY_DN18041_c1_g1	5.57751	0.0014276	-0.670538	1	NA	NA	Unknown protein	NA	NA	0.971048	0.981092	Turquoise
TRINITY_DN18041_c0_g2	6.16886	0.00142978	0	1	NA	NA	NA	NA	NA	0.845492	0.836326	Turquoise
TRINITY_DN17955_c0_g2	2.1267	0.867517	-0.383908	1	NA	NA	NA	NA	NA	0.833979	0.824799	Turquoise
TRINITY_DN17947_c0_g1	1.55585	1	-0.830377	1	NA	NA	NA	NA	NA	0.849892	0.863013	Turquoise
TRINITY_DN17931_c1_g1	3.46849	0.0012287	1.38909	1	tr|A0A453RZB7|A0A453RZB7_AEGTS	***	zf-RVT domain-containing protein	IPR026960 (Reverse transcriptase zinc-binding domain)	NA	0.93229	0.930907	Turquoise
TRINITY_DN17913_c0_g1	1.26626	1	0.278682	1	NA	NA	NA	NA	NA	0.791227	0.803177	Turquoise
TRINITY_DN17912_c1_g2	3.34759	0.0701613	0.527397	1	tr|A0A3B6DIC2|A0A3B6DIC2_WHEAT	***	RBR-type E3 ubiquitin transferase	IPR002867 (IBR domain), IPR013083 (Zinc finger, RING/FYVE/PHD-type), IPR016135 (Ubiquitin-conjugating enzyme/RWD-like), IPR031127 (E3 ubiquitin ligase RBR family)	NA	0.896973	0.888886	Turquoise
TRINITY_DN17910_c0_g3	1.40875	1	0.0611782	1	tr|B6SUS7|B6SUS7_MAIZE	***	Outer mitochondrial membrane protein porin	IPR023614 (Porin domain), IPR027246 (Eukaryotic porin/Tom40)	GO:0005741, GO:0008308, GO:0015698, GO:0055085, GO:0098656	0.838439	0.827322	Turquoise
TRINITY_DN1791_c0_g2	0.54071	1	0.0696751	1	tr|Q6WSC2|Q6WSC2_ORYSI	***	Glutathione S-transferase	IPR010987 (Glutathione S-transferase, C-terminal-like), IPR012336 (Thioredoxin-like fold)	GO:0016740	0.890841	0.890749	Turquoise
TRINITY_DN17906_c0_g1	1.65117	1	-3.69302	0.425596	NA	NA	Unknown protein	NA	NA	0.874609	0.880214	Turquoise
TRINITY_DN17900_c0_g1	3.42664	0.211378	1.68518	1	NA	NA	Unknown protein	NA	NA	0.838097	0.850277	Turquoise
TRINITY_DN178936_c0_g1	7.88282	3.64e-08	0.561343	1	NA	NA	NA	NA	NA	0.899904	0.874162	Turquoise
TRINITY_DN17880_c0_g1	2.07339	1	-0.899607	1	NA	NA	Unknown protein	NA	NA	0.846196	0.844795	Turquoise
TRINITY_DN17875_c1_g1	3.56311	0.0326696	1.70652	1	NA	NA	NA	NA	NA	0.863636	0.866677	Turquoise
TRINITY_DN17864_c0_g1	1.48224	1	-0.177441	1	NA	NA	NA	NA	NA	0.840432	0.824441	Turquoise
TRINITY_DN17848_c0_g1	-0.645303	1	0.218344	1	NA	NA	NA	NA	NA	-0.86691	-0.860805	Turquoise
TRINITY_DN17827_c1_g1	1.92901	0.0693696	0.144133	1	tr|Q10S17|Q10S17_ORYSJ	***	Cytochrome P450 family protein, expressed	IPR001128 (Cytochrome P450)	GO:0004497, GO:0005506, GO:0016020, GO:0016021, GO:0016491, GO:0016705, GO:0020037, GO:0046872, GO:0055114	0.827603	0.815231	Turquoise
TRINITY_DN1782_c0_g2	-0.963199	1	0.149534	1	NA	NA	NA	NA	NA	-0.949021	-0.953451	Turquoise
TRINITY_DN1782_c0_g1	-1.15051	1	0.495974	1	tr|A0A3L6FL06|A0A3L6FL06_MAIZE	***	Protein Iojap-related, mitochondrial	IPR004394 (Protein Iojap/ribosomal silencing factor RsfS)	NA	-0.883741	-0.8771	Turquoise
TRINITY_DN17802_c0_g1	1.24202	1	-0.398262	1	tr|A0A1E5UJ24|A0A1E5UJ24_9POAL	***	Heat shock 70 kDa protein, mitochondrial	IPR013126 (Heat shock protein 70 family), IPR029047 (Heat shock protein 70kD, peptide-binding domain)	GO:0000166, GO:0005524	0.852784	0.844132	Turquoise
TRINITY_DN17777_c1_g1	2.46629	0.383747	-0.774132	1	NA	NA	NA	NA	NA	0.923459	0.930519	Turquoise
TRINITY_DN17775_c1_g1	7.15525	4.19e-07	5.9555	0.000455646	NA	NA	NA	NA	NA	0.801019	0.825045	Turquoise
TRINITY_DN17732_c0_g1	2.2866	0.179449	0.327694	1	NA	NA	Unknown protein	NA	NA	0.84548	0.869802	Turquoise
TRINITY_DN17715_c1_g1	3.50375	0.0590883	0.776081	1	NA	NA	Unknown protein	NA	NA	0.891538	0.900167	Turquoise
TRINITY_DN1771_c0_g1	3.59482	0.367665	-2.63053	1	tr|A0A3L6F8V6|A0A3L6F8V6_MAIZE	***	Myb_DNA-bind_3 domain-containing protein	IPR024752 (Myb/SANT-like domain)	NA	0.941805	0.933353	Turquoise
TRINITY_DN17703_c1_g1	2.93772	0.00159689	1.20233	1	tr|A0A2T7EBA4|A0A2T7EBA4_9POAL	*-*	Protein kinase domain-containing protein	IPR011009 (Protein kinase-like domain)	GO:0004672, GO:0005524, GO:0006468, GO:0016020, GO:0016021	0.866637	0.859604	Turquoise
TRINITY_DN176635_c0_g1	3.05826	0.0041792	0.71238	1	sp|P04784|CB21_WHEAT	*-*	Chlorophyll a-b binding protein, chloroplastic	IPR022796 (Chlorophyll A-B binding protein), IPR023329 (Chlorophyll a/b binding protein domain)	GO:0009507, GO:0009522, GO:0009523, GO:0009535, GO:0009536, GO:0009579, GO:0009765, GO:0015979, GO:0016020, GO:0016021, GO:0016168, GO:0018298, GO:0046872	0.919458	0.926608	Turquoise
TRINITY_DN17649_c1_g1	3.09544	0.721199	-4.08814	0.887107	tr|A0A446XNA3|A0A446XNA3_TRITD	*-*	Protein kinase domain-containing protein	IPR032675 (Leucine-rich repeat domain, L domain-like)	NA	0.910497	0.919427	Turquoise
TRINITY_DN17637_c0_g1	1.39998	1	-1.09467	1	tr|I1HN99|I1HN99_BRADI	*-*	Phospholipid-transporting ATPase	IPR006539 (P-type ATPase, subfamily IV), IPR023214 (HAD-like domain)	GO:0000139, GO:0000166, GO:0000287, GO:0004012, GO:0005524, GO:0005802, GO:0005886, GO:0015914, GO:0016020, GO:0016021, GO:0016787, GO:0045332, GO:0048194	0.833273	0.826933	Turquoise
TRINITY_DN17632_c0_g1	3.31096	NA	1.05091	NA	NA	NA	Unknown protein	NA	NA	0.906451	0.899769	Turquoise
TRINITY_DN1761_c1_g1	1.06053	1	-0.748916	1	NA	NA	NA	NA	NA	0.800854	0.809975	Turquoise
TRINITY_DN17576_c0_g1	3.02286	2.37e-06	0.800212	1	tr|A0A0A9HPL7|A0A0A9HPL7_ARUDO	***	CYCLIN domain-containing protein	IPR013763 (Cyclin-like)	GO:0005634	0.942341	0.940497	Turquoise
TRINITY_DN17566_c0_g1	1.84003	0.293935	0.140138	1	NA	NA	Unknown protein	NA	NA	0.897969	0.874663	Turquoise
TRINITY_DN175605_c0_g1	2.57138	1	-2.25503	1	NA	NA	NA	NA	NA	0.811457	0.831313	Turquoise
TRINITY_DN17552_c0_g1	1.96023	0.349627	-0.691594	1	sp|P13192|PSAF_HORVU	***	Photosystem I reaction center subunit III, chloroplastic	IPR003666 (Photosystem I PsaF, reaction centre subunit III)	GO:0009507, GO:0009522, GO:0009536, GO:0009538, GO:0009543, GO:0009579, GO:0015979	0.845527	0.844843	Turquoise
TRINITY_DN17537_c2_g1	6.52467	7.68e-05	3.97018	0.289081	tr|A0A1D6HSK7|A0A1D6HSK7_MAIZE	*-*	Core-2/I-branching beta-16-N-acetylglucosaminyltransferase family protein	NA	GO:0008375, GO:0016020, GO:0016740, GO:0016757	0.891712	0.904475	Turquoise
TRINITY_DN17533_c0_g1	2.09954	1	0.133937	1	tr|A0A446MU19|A0A446MU19_TRITD	***	AAI domain-containing protein	IPR027923 (Hydrophobic seed protein)	NA	0.811157	0.804973	Turquoise
TRINITY_DN17519_c0_g4	2.90501	0.522878	-0.115574	1	NA	NA	NA	NA	NA	0.956465	0.960952	Turquoise
TRINITY_DN17509_c0_g1	8.29819	1.15e-09	0	1	NA	NA	NA	NA	NA	0.906933	0.921687	Turquoise
TRINITY_DN17489_c0_g1	6.74973	1.62e-08	-2.21024	1	NA	NA	NA	NA	NA	0.90751	0.912601	Turquoise
TRINITY_DN17477_c0_g1	1.37167	0.641241	0.138088	1	NA	NA	Unknown protein	NA	NA	0.924462	0.922106	Turquoise
TRINITY_DN174754_c0_g1	5.46471	0.404116	2.47572	1	NA	NA	NA	NA	NA	0.877578	0.866634	Turquoise
TRINITY_DN17474_c1_g1	1.45018	1	0.00369097	1	tr|A0A5A7RGP9|A0A5A7RGP9_STRAF	***	Na(+)-translocating NADH-quinone reductasesubunit F	NA	NA	0.8911	0.902331	Turquoise
TRINITY_DN17466_c0_g1	0.360299	1	0.0158438	1	tr|B6U001|B6U001_MAIZE	***	Solute carrier family 35, member F1	IPR009262 (Solute carrier family 35 member SLC35F1/F2/F6)	GO:0016021, GO:0022857, GO:0055085	0.831866	0.814531	Turquoise
TRINITY_DN17420_c0_g1	1.60684	1	-0.12589	1	NA	NA	NA	NA	NA	0.814432	0.832013	Turquoise
TRINITY_DN17397_c2_g1	6.98879	5.98e-05	0	1	NA	NA	NA	NA	NA	0.84185	0.851074	Turquoise
TRINITY_DN17397_c0_g1	4.01373	9.53e-11	2.95482	0.000497581	NA	NA	NA	NA	NA	0.868597	0.881798	Turquoise
TRINITY_DN17392_c0_g2	-4.69517	0.000730138	0.164932	1	NA	NA	Unknown protein	NA	NA	-0.8422	-0.852273	Turquoise
TRINITY_DN17370_c0_g1	5.05893	1.03e-10	1.02035	1	NA	NA	NA	NA	NA	0.829951	0.83638	Turquoise
TRINITY_DN173672_c0_g1	4.57589	0.0718547	-1.169	1	NA	NA	NA	NA	NA	0.825889	0.827195	Turquoise
TRINITY_DN17355_c0_g1	4.35586	0.000805557	-2.34327	1	NA	NA	Unknown protein	NA	NA	0.95818	0.962854	Turquoise
TRINITY_DN17346_c1_g1	8.72426	0.000369821	5.22915	0.362746	NA	NA	Unknown protein	NA	NA	0.940729	0.937003	Turquoise
TRINITY_DN17342_c1_g1	2.54513	0.705285	-0.831327	1	NA	NA	NA	NA	NA	0.849205	0.867632	Turquoise
TRINITY_DN1732_c0_g3	1.88755	0.979725	0.179406	1	tr|A0A453PA94|A0A453PA94_AEGTS	*-*	Reverse transcriptase domain-containing protein	IPR000477 (Reverse transcriptase domain)	NA	0.855445	0.835897	Turquoise
TRINITY_DN173191_c0_g1	1.92471	0.950736	-1.5295	1	NA	NA	NA	NA	NA	0.951213	0.943685	Turquoise
TRINITY_DN17318_c0_g2	2.42424	0.0074846	1.33429	1	NA	NA	Unknown protein	NA	NA	0.824512	0.811072	Turquoise
TRINITY_DN17285_c0_g1	1.25492	1	-0.0973375	1	AT1G02816.1	***	Protein of unknown function, DUF538	IPR007493 (Protein of unknown function DUF538)	NA	0.85457	0.832517	Turquoise
TRINITY_DN17275_c0_g1	2.14733	1	-0.477294	1	tr|A0A0Q3RWQ8|A0A0Q3RWQ8_BRADI	*-*	DUF4283 domain-containing protein	IPR001878 (Zinc finger, CCHC-type)	GO:0003676, GO:0008270	0.831874	0.845346	Turquoise
TRINITY_DN17248_c0_g1	2.1687	0.433596	-0.66822	1	NA	NA	NA	NA	NA	0.885172	0.890043	Turquoise
TRINITY_DN17245_c1_g1	1.40658	1	0.493965	1	NA	NA	NA	NA	NA	0.801164	0.815921	Turquoise
TRINITY_DN172369_c0_g1	4.15882	0.000409401	0.929117	1	NA	NA	NA	NA	NA	0.983829	0.984798	Turquoise
TRINITY_DN17231_c0_g1	0.993861	1	0.347094	1	tr|A0A061G5H4|A0A061G5H4_THECC	***	Phosphoglycerate mutase family protein	IPR001345 (Phosphoglycerate/bisphosphoglycerate mutase, active site), IPR029033 (Histidine phosphatase superfamily)	GO:0003824	0.850914	0.850469	Turquoise
TRINITY_DN1721_c1_g1	1.3724	0.709822	-0.0235292	1	NA	NA	NA	NA	NA	0.94554	0.94967	Turquoise
TRINITY_DN17191_c0_g1	9.04583	1.1e-11	0.560118	1	NA	NA	Unknown protein	NA	NA	0.843687	0.821584	Turquoise
TRINITY_DN1719_c0_g1	-1.18862	1	0.18903	1	tr|A0A3L6SZZ2|A0A3L6SZZ2_PANMI	***	RPA-interacting protein A	IPR028155 (RPA-interacting protein, central domain), IPR028156 (RPA-interacting protein), IPR028158 (RPA-interacting protein, N-terminal domain)	NA	-0.85075	-0.839777	Turquoise
TRINITY_DN17154_c0_g2	-2.3551	0.0878341	-0.431394	1	NA	NA	NA	NA	NA	-0.812673	-0.807265	Turquoise
TRINITY_DN17154_c0_g1	0.505223	1	0.205311	1	tr|I1IXU8|I1IXU8_BRADI	***	Thioredoxin domain-containing protein	IPR012336 (Thioredoxin-like fold)	GO:0003756, GO:0005783, GO:0006457, GO:0016020, GO:0016021, GO:0034976, GO:0045454	0.786254	0.801263	Turquoise
TRINITY_DN1713_c0_g1	0.774607	1	-0.113533	1	tr|A0A059PZS3|A0A059PZS3_9POAL	***	Kinase	IPR011009 (Protein kinase-like domain)	GO:0004672, GO:0005524, GO:0006468, GO:0016301, GO:0016310	0.920644	0.917262	Turquoise
TRINITY_DN17124_c0_g1	1.89141	0.699371	0.612841	1	NA	NA	NA	NA	NA	0.834791	0.821017	Turquoise
TRINITY_DN17115_c0_g1	2.15422	0.888751	0.045848	1	NA	NA	Unknown protein	NA	NA	0.798478	0.825194	Turquoise
TRINITY_DN171057_c0_g1	0.959394	1	-0.643762	1	NA	NA	NA	NA	NA	0.838357	0.854045	Turquoise
TRINITY_DN17089_c0_g1	1.11086	1	0.202958	1	NA	NA	NA	NA	NA	0.832871	0.835522	Turquoise
TRINITY_DN17052_c0_g1	5.79426	0.00213789	2.18804	1	tr|A0A059Q329|A0A059Q329_9POAL	***	Dephospho-CoA kinase	IPR001977 (Dephospho-CoA kinase), IPR027417 (P-loop containing nucleoside triphosphate hydrolase)	GO:0004140, GO:0005524, GO:0015937, GO:0016301, GO:0016310	0.969953	0.965599	Turquoise
TRINITY_DN170414_c1_g1	2.23468	1	-2.99243	0.936131	NA	NA	NA	NA	NA	0.815975	0.8103	Turquoise
TRINITY_DN17039_c0_g1	4.43005	0.00362198	0.022946	1	NA	NA	NA	NA	NA	0.949995	0.961024	Turquoise
TRINITY_DN17025_c0_g1	2.33419	0.503278	0.943455	1	NA	NA	NA	NA	NA	0.805257	0.813701	Turquoise
TRINITY_DN17024_c0_g3	6.12581	0.00027576	4.22901	0.190839	NA	NA	NA	NA	NA	0.834827	0.829418	Turquoise
TRINITY_DN17007_c0_g1	0.691919	1	0.0803875	1	tr|I1HF94|I1HF94_BRADI	***	Xpo1 domain-containing protein	IPR013598 (Exportin-1/Importin-beta-like), IPR016024 (Armadillo-type fold)	GO:0005049, GO:0005634, GO:0005737, GO:0042565, GO:0046825, GO:0051168	0.804079	0.812217	Turquoise
TRINITY_DN16995_c0_g1	3.86025	0.0379064	-4.45777	0.24277	NA	NA	NA	NA	NA	0.860243	0.858897	Turquoise
TRINITY_DN16950_c0_g1	1.04151	1	-0.233853	1	NA	NA	NA	NA	NA	0.861945	0.862373	Turquoise
TRINITY_DN16832_c0_g2	3.96775	0.000317459	1.10844	1	NA	NA	NA	NA	NA	0.923092	0.921777	Turquoise
TRINITY_DN16820_c3_g1	1.64596	1	-1.418	1	NA	NA	Unknown protein	NA	NA	0.888573	0.897332	Turquoise
TRINITY_DN168167_c0_g1	5.25911	4.55e-12	2.81605	0.0601238	tr|A0A287KAZ2|A0A287KAZ2_HORVV	***	DUF1618 domain-containing protein	IPR011676 (Domain of unknown function DUF1618)	NA	0.816797	0.838784	Turquoise
TRINITY_DN16790_c0_g1	4.54528	0.0178001	-2.15243	1	NA	NA	NA	NA	NA	0.911931	0.919339	Turquoise
TRINITY_DN1679_c0_g1	2.33612	0.693092	-1.76033	1	NA	NA	NA	NA	NA	0.928402	0.920207	Turquoise
TRINITY_DN16782_c0_g1	1.51536	1	-1.17301	1	NA	NA	NA	NA	NA	0.802018	0.815445	Turquoise
TRINITY_DN16776_c3_g1	7.88051	0.00907156	3.888	1	NA	NA	NA	NA	NA	0.911813	0.918725	Turquoise
TRINITY_DN1677_c3_g1	3.28634	0.00304036	0.504604	1	NA	NA	NA	NA	NA	0.865259	0.861824	Turquoise
TRINITY_DN16746_c0_g1	6.40818	8.3e-05	-0.592725	1	NA	NA	NA	NA	NA	0.893674	0.882801	Turquoise
TRINITY_DN16733_c0_g1	6.6392	6.37e-06	5.05861	0.0121541	NA	NA	NA	NA	NA	0.875569	0.877898	Turquoise
TRINITY_DN16722_c0_g1	2.31052	0.534048	-5.74778	0.00702328	NA	NA	Unknown protein	NA	NA	0.917984	0.919213	Turquoise
TRINITY_DN16699_c0_g1	2.55511	0.114536	-0.422382	1	NA	NA	NA	NA	NA	0.898634	0.89845	Turquoise
TRINITY_DN16691_c0_g1	3.18825	0.441338	-3.71064	0.915508	NA	NA	Unknown protein	NA	NA	0.924729	0.921006	Turquoise
TRINITY_DN16668_c0_g2	-1.55639	0.531937	0.303753	1	tr|A0A0Q3PKE2|A0A0Q3PKE2_BRADI	***	Fe-S_biosyn domain-containing protein	IPR000361 (FeS cluster biogenesis), IPR016092 (FeS cluster insertion protein)	GO:0005198, GO:0051536, GO:0097428	-0.88423	-0.888352	Turquoise
TRINITY_DN16661_c0_g1	6.10377	0.000161276	4.15943	0.156031	NA	NA	NA	NA	NA	0.825404	0.81877	Turquoise
TRINITY_DN16654_c0_g1	3.7493	0.00868854	-3.57572	0.553919	NA	NA	NA	NA	NA	0.934815	0.931096	Turquoise
TRINITY_DN16606_c1_g1	1.96617	0.974203	0.213348	1	NA	NA	NA	NA	NA	0.844276	0.867873	Turquoise
TRINITY_DN16581_c0_g1	1.24373	1	0.360816	1	NA	NA	NA	NA	NA	0.854145	0.868108	Turquoise
TRINITY_DN16558_c0_g2	1.82047	1	-0.673293	1	tr|A0A287EEF3|A0A287EEF3_HORVV	*-*	Phospholipid-transporting ATPase	IPR006539 (P-type ATPase, subfamily IV)	GO:0000166, GO:0000287, GO:0004012, GO:0005524, GO:0015914, GO:0016020, GO:0016021, GO:0016787, GO:0045332	0.857037	0.861945	Turquoise
TRINITY_DN16542_c0_g1	-3.20289	0.424777	-0.47878	1	tr|I1GRK9|I1GRK9_BRADI	*-*	Glutamine amidotransferase type-2 domain-containing protein	IPR029055 (Nucleophile aminohydrolases, N-terminal)	GO:0003824, GO:0006537, GO:0006807, GO:0015930, GO:0016491, GO:0016638, GO:0019676, GO:0055114	-0.786068	-0.803992	Turquoise
TRINITY_DN16523_c0_g2	7.53021	5.07e-05	4.09793	0.450865	NA	NA	Unknown protein	NA	NA	0.893074	0.907506	Turquoise
TRINITY_DN165036_c0_g1	6.1541	0.000210907	-0.0121539	1	NA	NA	NA	NA	NA	0.88943	0.897387	Turquoise
TRINITY_DN16498_c0_g1	-6.55724	8.58e-06	-0.597661	1	NA	NA	NA	NA	NA	-0.813724	-0.829657	Turquoise
TRINITY_DN16496_c0_g1	7.02598	2.56e-06	0	1	NA	NA	NA	NA	NA	0.950212	0.933119	Turquoise
TRINITY_DN16487_c0_g2	7.9218	1.2e-07	5.92277	0.00202768	NA	NA	Unknown protein	NA	NA	0.801396	0.822907	Turquoise
TRINITY_DN16484_c0_g1	-1.11091	1	0.30515	1	tr|A0A2R6R061|A0A2R6R061_ACTCC	***	B-box zinc finger protein	IPR000315 (B-box-type zinc finger)	GO:0008270	-0.830871	-0.819766	Turquoise
TRINITY_DN16477_c0_g1	0.866366	1	-0.248981	1	tr|B6T405|B6T405_MAIZE	***	CAAX amino terminal protease family protein	IPR003675 (CAAX amino terminal protease)	GO:0006508, GO:0008233, GO:0016020, GO:0016021	0.899882	0.886668	Turquoise
TRINITY_DN164713_c1_g1	6.1012	2.03e-16	-2.29583	1	NA	NA	Unknown protein	NA	NA	0.962144	0.965642	Turquoise
TRINITY_DN16462_c0_g1	8.27389	1.52e-09	0.575904	1	NA	NA	NA	NA	NA	0.895823	0.90251	Turquoise
TRINITY_DN16440_c0_g1	-0.540172	1	0.0921697	1	tr|A0A3L6D9Q7|A0A3L6D9Q7_MAIZE	***	Transcription initiation factor TFIID subunit 9	IPR003162 (Transcription initiation factor TAFII31), IPR009072 (Histone-fold)	NA	-0.862371	-0.85477	Turquoise
TRINITY_DN16413_c0_g2	2.26716	0.440105	0.0255641	1	NA	NA	NA	NA	NA	0.885817	0.904901	Turquoise
TRINITY_DN16402_c0_g1	0.808173	1	-0.240571	1	tr|A0A1D6GK66|A0A1D6GK66_MAIZE	***	Ribosomal protein S21 family protein	IPR001911 (Ribosomal protein S21)	GO:0003735, GO:0005840, GO:0006412	0.888391	0.881354	Turquoise
TRINITY_DN1637_c0_g3	7.0948	2.19e-07	1.83846	1	NA	NA	NA	NA	NA	0.910485	0.925465	Turquoise
TRINITY_DN16367_c1_g1	6.94189	1.39e-05	1.11985	1	NA	NA	NA	NA	NA	0.896849	0.901982	Turquoise
TRINITY_DN16347_c0_g1	1.08232	1	-0.264024	1	NA	NA	NA	NA	NA	0.867302	0.872295	Turquoise
TRINITY_DN1633_c0_g1	0.540176	1	0.142309	1	tr|I1II18|I1II18_BRADI	***	B5 domain-containing protein	IPR002319 (Phenylalanyl-tRNA synthetase), IPR004531 (Phenylalanyl-tRNA synthetase, class IIc, beta subunit, archae/euk cytosolic)	GO:0000166, GO:0000287, GO:0003723, GO:0004826, GO:0005524, GO:0005737, GO:0005829, GO:0006432, GO:0009328	0.780419	0.803098	Turquoise
TRINITY_DN16326_c0_g1	0.949875	1	-0.289082	1	tr|A0A5B6VJ72|A0A5B6VJ72_9ROSI	***	40S ribosomal protein S23-1	NA	NA	0.806528	0.815432	Turquoise
TRINITY_DN16308_c0_g1	2.54169	0.0258231	0.787232	1	NA	NA	NA	NA	NA	0.894497	0.909567	Turquoise
TRINITY_DN16293_c0_g2	2.2314	0.32554	0.00289298	1	NA	NA	NA	NA	NA	0.863306	0.848507	Turquoise
TRINITY_DN16293_c0_g1	6.63955	1.96e-05	0	1	tr|I1H7W0|I1H7W0_BRADI	*-*	Cyclin N-terminal domain-containing protein	NA	GO:0000079, GO:0000278, GO:0000307, GO:0005634, GO:0005737, GO:0006468, GO:0007088, GO:0007129, GO:0008284, GO:0016538, GO:0019901, GO:0045787	0.976527	0.963941	Turquoise
TRINITY_DN16273_c1_g1	5.88568	0.00151605	0	1	NA	NA	NA	NA	NA	0.93533	0.925587	Turquoise
TRINITY_DN1626_c0_g1	0.714889	1	-0.0801696	1	tr|A0A287V730|A0A287V730_HORVV	***	Chlorophyll a-b binding protein, chloroplastic	IPR022796 (Chlorophyll A-B binding protein), IPR023329 (Chlorophyll a/b binding protein domain)	GO:0009507, GO:0009522, GO:0009523, GO:0009535, GO:0009536, GO:0009579, GO:0009765, GO:0015979, GO:0016020, GO:0016021, GO:0016168, GO:0018298	0.88941	0.875036	Turquoise
TRINITY_DN16258_c0_g1	1.65893	0.966139	0.527173	1	NA	NA	NA	NA	NA	0.80003	0.812905	Turquoise
TRINITY_DN162574_c0_g1	1.40951	0.856558	0.229489	1	tr|A0A2R6QV67|A0A2R6QV67_ACTCC	***	Transcription factor like	IPR025422 (Transcription factor TGA like domain)	GO:0003700, GO:0006351, GO:0006355, GO:0043565	0.843544	0.855974	Turquoise
TRINITY_DN16248_c3_g1	4.59235	0.000100486	3.44517	0.0680976	NA	NA	NA	NA	NA	0.820218	0.832431	Turquoise
TRINITY_DN162391_c0_g1	-1.89052	0.00578522	0.111977	1	sp|P69309|UBIQP_AVEFA	***	Polyubiquitin	IPR019956 (Ubiquitin), IPR029071 (Ubiquitin-related domain)	GO:0005634, GO:0005737	-0.824729	-0.82011	Turquoise
TRINITY_DN162268_c0_g1	2.24331	1	-5.23251	0.14522	NA	NA	Unknown protein	NA	NA	0.86616	0.867085	Turquoise
TRINITY_DN162086_c0_g1	12.0744	1.22e-26	10.7316	7.45e-20	NA	NA	NA	NA	NA	0.841698	0.851525	Turquoise
TRINITY_DN162_c0_g2	0.403674	1	-0.0139307	1	tr|A0A446K5T7|A0A446K5T7_TRITD	***	SANT domain-containing protein	IPR009057 (Homeobox domain-like), IPR030701 (Transcription factor TFIIIB component B'')	NA	0.819677	0.81176	Turquoise
TRINITY_DN161831_c0_g1	3.31565	0.0210995	1.89445	1	NA	NA	NA	NA	NA	0.850512	0.85289	Turquoise
TRINITY_DN1618_c0_g1	1.00577	1	0.336698	1	NA	NA	Unknown protein	NA	NA	0.859455	0.863183	Turquoise
TRINITY_DN161783_c0_g1	7.25659	6.35e-10	-2.14536	1	tr|A0A0Q3M0K0|A0A0Q3M0K0_BRADI	*-*	CCHC-type domain-containing protein	IPR025558 (Domain of unknown function DUF4283), IPR025836 (Zinc knuckle CX2CX4HX4C)	GO:0003676, GO:0008270	0.850713	0.850265	Turquoise
TRINITY_DN16171_c0_g1	2.40851	0.00120226	-0.100823	1	tr|A0A059Q2R4|A0A059Q2R4_9POAL	***	Disease resistance protein	IPR002182 (NB-ARC), IPR027417 (P-loop containing nucleoside triphosphate hydrolase), IPR032675 (Leucine-rich repeat domain, L domain-like)	GO:0043531	0.97897	0.975341	Turquoise
TRINITY_DN1614_c0_g1	-0.601357	1	-0.184627	1	tr|A0A287P5J8|A0A287P5J8_HORVV	***	CBM20 domain-containing protein	IPR001345 (Phosphoglycerate/bisphosphoglycerate mutase, active site), IPR027417 (P-loop containing nucleoside triphosphate hydrolase), IPR029033 (Histidine phosphatase superfamily)	GO:0003824, GO:0003873, GO:0005524, GO:0006000, GO:0006003, GO:0030246, GO:0046835, GO:2001070	-0.819319	-0.820574	Turquoise
TRINITY_DN16128_c0_g1	1.61413	0.152336	0.863817	1	tr|A0A4Y7KGK0|A0A4Y7KGK0_PAPSO	*-*	HATPase_c domain-containing protein	IPR001404 (Heat shock protein Hsp90 family)	NA	0.848479	0.84895	Turquoise
TRINITY_DN16125_c0_g1	2.0265	0.321452	0.53618	1	NA	NA	NA	NA	NA	0.844929	0.831437	Turquoise
TRINITY_DN1612_c0_g1	0.790946	1	0.147546	1	tr|D7LMI5|D7LMI5_ARALL	*-*	Kinase	IPR011009 (Protein kinase-like domain)	GO:0004672, GO:0005524, GO:0006468, GO:0007017, GO:0016301, GO:0016310, GO:0043622, GO:0055028	0.925685	0.922297	Turquoise
TRINITY_DN16109_c0_g1	1.39689	1	-6.98394	1.11e-06	tr|Q7XW14|Q7XW14_ORYSJ	*-*	ATP-dependent DNA helicase	NA	GO:0000166, GO:0000723, GO:0003678, GO:0004386, GO:0005524, GO:0006281, GO:0006310, GO:0006974, GO:0016787, GO:0032508	0.880267	0.861397	Turquoise
TRINITY_DN16091_c0_g3	1.52845	1	-1.15527	1	NA	NA	Unknown protein	NA	NA	0.844488	0.841069	Turquoise
TRINITY_DN16091_c0_g1	2.07182	0.043042	-0.448936	1	NA	NA	Unknown protein	NA	NA	0.969333	0.96969	Turquoise
TRINITY_DN16090_c0_g1	-0.727471	1	0.052758	1	tr|A0A2P5ARF8|A0A2P5ARF8_TREOI	***	50S ribosomal protein-like protein	NA	GO:0005840	-0.831128	-0.840058	Turquoise
TRINITY_DN1608_c0_g1	0.755228	1	0.0517001	1	tr|A0A200QBY1|A0A200QBY1_9MAGN	***	Inositol monophosphatase	IPR000760 (Inositol monophosphatase-like)	GO:0046854	0.820137	0.820333	Turquoise
TRINITY_DN16053_c0_g1	-3.07428	1.37e-07	-0.0997625	1	tr|A0A2X0S7Z4|A0A2X0S7Z4_WHEAT	***	DNA mismatch repair protein	IPR000432 (DNA mismatch repair protein MutS, C-terminal), IPR007695 (DNA mismatch repair protein MutS-like, N-terminal), IPR007696 (DNA mismatch repair protein MutS, core), IPR007860 (DNA mismatch repair protein MutS, connector domain), IPR027417 (P-loop containing nucleoside triphosphate hydrolase)	GO:0000166, GO:0003677, GO:0005524, GO:0006281, GO:0006298, GO:0006974, GO:0030983	-0.840629	-0.853171	Turquoise
TRINITY_DN1604_c0_g1	1.84349	0.339998	0.582061	1	NA	NA	Unknown protein	NA	NA	0.841773	0.860431	Turquoise
TRINITY_DN16039_c1_g1	-4.70922	1.72e-10	0.0338138	1	NA	NA	Unknown protein	NA	NA	-0.856014	-0.840721	Turquoise
TRINITY_DN16029_c0_g1	3.77847	0.037654	-3.08462	1	NA	NA	NA	NA	NA	0.971553	0.96647	Turquoise
TRINITY_DN16021_c0_g1	1.48709	0.691098	-0.807976	1	NA	NA	NA	NA	NA	0.941559	0.93844	Turquoise
TRINITY_DN16017_c1_g1	3.67753	0.00556495	1.90276	1	NA	NA	NA	NA	NA	0.918529	0.915721	Turquoise
TRINITY_DN16_c1_g1	1.93528	0.286251	-0.855158	1	tr|A0A2X0SCV8|A0A2X0SCV8_WHEAT	***	Receptor-like serine/threonine-protein kinase	IPR000858 (S-locus glycoprotein domain), IPR001480 (Bulb-type lectin domain), IPR003609 (PAN/Apple domain), IPR011009 (Protein kinase-like domain), IPR013320 (Concanavalin A-like lectin/glucanase domain), IPR024171 (S-receptor-like serine/threonine-protein kinase)	GO:0000166, GO:0004672, GO:0004674, GO:0005524, GO:0006468, GO:0016020, GO:0016021, GO:0016301, GO:0016310, GO:0016740, GO:0048544	0.858253	0.871005	Turquoise
TRINITY_DN15973_c0_g3	6.42508	0.00222301	2.89104	1	NA	NA	NA	NA	NA	0.890008	0.87761	Turquoise
TRINITY_DN15939_c0_g1	-9.37475	2.01e-15	-0.0126895	1	NA	NA	NA	NA	NA	-0.921684	-0.922548	Turquoise
TRINITY_DN15921_c0_g1	1.09517	1	-1.02708	1	tr|A0A446RZ05|A0A446RZ05_TRITD	***	Protein DETOXIFICATION	IPR002528 (Multi antimicrobial extrusion protein)	NA	0.868943	0.853973	Turquoise
TRINITY_DN15905_c0_g1	1.61504	0.578456	-0.161818	1	tr|A0A1W0W7W6|A0A1W0W7W6_SORBI	*-*	HMA domain-containing protein	NA	GO:0030001, GO:0046872	0.914089	0.915054	Turquoise
TRINITY_DN15903_c0_g1	3.45862	0.294917	-3.3269	1	NA	NA	Unknown protein	NA	NA	0.856092	0.841771	Turquoise
TRINITY_DN1590_c0_g2	1.71397	0.814305	-0.369394	1	NA	NA	NA	NA	NA	0.868077	0.88065	Turquoise
TRINITY_DN159_c0_g1	2.37002	0.00738981	0.752228	1	NA	NA	Unknown protein	NA	NA	0.929805	0.94092	Turquoise
TRINITY_DN15895_c0_g2	-9.41977	1.14e-15	0.069491	1	NA	NA	NA	NA	NA	-0.904216	-0.899402	Turquoise
TRINITY_DN15889_c0_g1	2.21099	1	-3.87497	0.65436	tr|A0A2P2MFM3|A0A2P2MFM3_RHIMU	*-*	Ubiquitin carboxyl-terminal hydrolase	IPR008974 (TRAF-like)	GO:0006511, GO:0016579, GO:0016787, GO:0036459	0.804186	0.801021	Turquoise
[truncated: 1,822 more rows]

## Sheet: TableS6
Table S6. Annotations in the HUB gene lists of the three modules highly correlated with the NTSR3 and NTSR2 phenotypes. Number of unigenes for each annotation are indicated in the columns.
Turquoise: Positive correlation with Fenoxaprop population. Pink: Negative correlation with NTSR3 population (derived from HS and selected for resistance to fenoxaprop-P-ethyl). Blue: Positive correlation with NTSR2 population (derived from HS and selected for resistance to pendimethalin).
Highlighted in green: annotations common in the three modules
Highlighted in yellow: annotations common in the turquoise and blue modules
Highlighted in orange: annotations common in the turquoise and pink modules
AHRD Annotations	Turquoise	Pink	Blue
(RAP Annotation release2) Conserved hypothetical protein	0	0	1
110 kDa U5 small nuclear ribonucleoprotein component CLO	1	0	0
14-3-3 domain-containing protein	1	0	0
1-acyl-sn-glycerol-3-phosphate acyltransferase delta isoform 1	1	0	0
1-deoxy-D-xylulose-5-phosphate synthase	1	0	1
2,3-bisphosphoglycerate-independent phosphoglycerate mutase	1	0	0
2-carboxy-D-arabinitol-1-phosphatase	0	0	1
2Fe-2S ferredoxin-type domain-containing protein	1	0	0
30-kDa cleavage and polyadenylation specificity factor 30	0	0	1
3'-5' exonuclease domain-containing protein	0	0	1
3-hydroxybutyryl-CoA dehydratase	0	0	1
3-hydroxyisobutyryl-CoA hydrolase, mitochondrial	0	0	1
3-isopropylmalate dehydroge0se	1	0	0
3-ketoacyl-CoA synthase	2	0	0
3-oxoacyl-reductase	1	0	0
4,5-dioxyge0se-like protein	0	0	1
40S ribosomal protein S23-1	1	0	0
4HBT domain-containing protein	0	0	2
4-hydroxy-4-methyl-2-oxoglutarate aldolase	1	0	0
50S ribosomal protein-like protein	1	0	0
60S ribosomal protein L34	0	0	1
60S ribosomal protein L9	1	0	0
A_deami0se domain-containing protein	1	0	0
AA_TR0_LIGASE_II domain-containing protein	0	0	1
Aa_trans domain-containing protein	1	0	1
AAA domain-containing protein	5	0	1
AAA_16 domain-containing protein	0	0	1
AAI domain-containing protein	1	0	1
AAR2 protein family	1	0	0
AB hydrolase-1 domain-containing protein	2	0	0
ABC transporter B family protein	1	0	0
ABC transporter C family member 10	1	0	3
ABC transporter C family member 3	1	1	0
ABC transporter C family member 4	2	0	0
ABC transporter C family protein	0	0	1
ABC2_membrane domain-containing protein	1	0	0
Abhydrolase_3 domain-containing protein	2	1	2
Abscisic stress ripening protein	1	0	0
acidPPc domain-containing protein	1	0	0
Aconitase/3-isopropylmalate dehydratase large subunit	1	0	0
Acyl carrier protein	0	1	0
Acyl-CoA N-acyltransferase with RING/FYVE/PHD-type zinc finger protein	1	0	0
Adenine phosphoribosyltransferase	0	0	1
ADP-ribosylation factor	0	1	0
ADP-ribosylation factor-related protein 1	1	0	0
ADP-ribosylation factor-related protein 1-like	0	0	1
Agmatine deimi0se	1	0	0
AKT1-like potassium channel	1	0	0
Alanine--glyoxylate aminotransferase-2-like protein, mitochondrial	0	0	1
Alanine--tR0 ligase	0	0	1
Aldehyde oxidase, putative	1	0	0
Aldo_ket_red domain-containing protein	3	0	2
Algi0te regulatory protein AlgP	0	0	1
Alkaline phosphatase D	0	1	0
Alkaline phytoceramidase (APHC)	1	0	0
Alpha-2-macroglobulin	1	0	0
Amidase domain-containing protein	1	0	0
Amidohydro-rel domain-containing protein	2	0	0
Amidophosphoribosyltransferase	1	0	0
Amine oxidase	0	0	1
Amino_oxidase domain-containing protein	3	0	0
Amp-dependent synthetase and ligase	1	0	0
ANK_REP_REGION domain-containing protein	1	1	3
Annexin	1	1	0
Annexin D4	1	0	0
Anthocyanidin synthase	1	0	0
AP complex subunit sigma	0	0	1
AP2-like ethylene-responsive transcription factor	1	0	0
Aquaporin NIP3-1	1	0	0
Aquaporin PIP2	1	1	0
Arf-GAP domain-containing protein	1	0	0
Arginine--tR0 ligase	1	0	0
Argonaute	0	1	0
ARM repeat superfamily protein	1	0	0
Arp2/3 complex 34 kDa subunit	1	0	0
ATP phosphoribosyltransferase	1	0	0
ATP synthase mitochondrial F1 complex assembly factor 1	1	0	0
ATP synthase subunit B	0	0	1
ATP-dependent Clp protease ATP-binding subunit	1	0	0
ATP-dependent D0 helicase	6	0	0
ATP-dependent D0 helicase DDM1	0	0	1
ATP-dependent zinc metalloprotease	1	0	0
Autophagy-related protein 2	2	0	0
Auxilin-related protein 2	0	0	1
Auxin efflux carrier component	1	0	0
Auxin Efflux Carrier family protein	0	0	1
Auxin response factor	1	0	1
Auxin-responsive family protein	0	0	1
Auxin-responsive protein	1	0	0
B5 domain-containing protein	1	0	0
Bac_surface_Ag domain-containing protein	1	0	0
Bacterial transferase hexapeptiderepeat-containing protein	0	1	0
BAF250_C domain-containing protein	0	1	0
Bap31 domain-containing protein	0	1	0
B-box zinc finger protein	1	0	0
BED-type domain-containing protein	4	1	2
Beta-adaptin-like protein	0	0	1
Beta-fructofuranosidase, insoluble isoenzyme 3	0	0	1
Beta-fructofuranosidase, insoluble isoenzyme 7	1	0	0
Beta-galactosidase	1	0	0
Beta-glucosidase	0	0	1
Beta-glucosidase 31	0	0	1
Beta-glucosidase 5	0	0	1
Beta-glucosidase, putative	1	0	1
Beta-glucuronosyltransferase GlcAT14B	0	0	1
BHLH domain-containing protein	1	0	3
Bifunctio0l fucoki0se/fucose pyrophosphorylase	0	1	0
BRCA1-A complex subunit BRE	1	0	0
BRCT domain-containing protein	0	1	2
BRISC and BRCA1-A complex member 1	0	0	1
BRO1 domain-containing protein	0	0	1
BTB domain-containing protein	3	0	1
BTB/POZ domain-containing protein	1	0	0
BURP domain-containing protein	2	0	0
BZIP domain-containing protein	1	1	0
C2 and GRAM domain-containing protein	1	0	0
C2 domain-containing protein	2	0	1
C2 domain-containing protein/PRT_C domain-containing protein	0	0	1
C2 NT-type domain-containing protein	1	0	0
C2H2-type domain-containing protein	1	2	1
C2H2-type zinc finger protein	1	0	0
C3H1-type domain-containing protein	1	0	0
CAAX amino termi0l protease family protein	1	0	0
CAF1 family ribonuclease containing protein	1	0	0
Calcium ion binding protein	0	0	1
Calmodulin	1	0	0
Calmodulin-binding protein, putative, expressed	0	1	1
CaM_binding domain-containing protein	1	0	0
Carbonic anhydrase	1	0	0
Carboxypeptidase	0	0	1
Carotenoid cleavage dioxyge0se	0	0	1
Casein ki0se substrate, phosphoprotein PP28	1	0	0
CASP-like protein	1	1	0
Catalase	0	1	0
Cauli_VI domain-containing protein	2	0	0
CBFD_NFYB_HMF domain-containing protein	1	0	0
CBM20 domain-containing protein	1	0	0
CCHC-type domain-containing protein	14	2	5
CCR4-NOT transcription complex subunit 11	1	0	0
CCT domain-containing protein	1	0	0
Cell division control protein	1	0	0
cell division cycle 48	1	0	0
Cell division topological specificity factor-like protein, chloroplastic	0	0	1
Cell number regulator 6	1	0	0
Cellulase domain-containing protein	0	0	1
Cellulose synthase	0	0	2
Cellulose synthase-like CslF8	0	0	1
Cellulose synthase-like protein H1	0	0	2
Chaperone protein ClpB1-like	0	0	2
Chitin-binding type-1 domain-containing protein	0	0	1
Chloride channel protein	1	0	1
Chloride conductance regulatory protein ICln-like	0	1	0
Chlorophyll a-b binding protein, chloroplastic	11	1	2
Chorismate synthase	0	0	1
Chorismate_bind domain-containing protein	1	0	0
chromatin remodeling 24	3	0	0
Chromatin structure-remodeling complex protein SYD	2	0	0
CID domain-containing protein	0	0	1
CitMHS domain-containing protein	1	0	1
CMP-sialic acid transporter 3	1	0	0
CNL1	1	0	0
Coatomer subunit beta'-2	2	0	0
COBRA-like protein	1	0	0
Coiled-coil domain-containing protein SCD2-like	0	1	0
cold shock domain protein 1	1	0	0
Conserved oligomeric Golgi complex subunit 5	0	1	0
Core-2/I-branching beta-1,6-N-acetylglucosaminyltransferase family protein	0	0	2
Core-2/I-branching beta-16-N-acetylglucosaminyltransferase family protein	1	0	0
CRAL-TRIO domain-containing protein	0	1	0
CRT-like domain-containing protein	0	0	1
CsAtPR5	3	0	0
CsAtPR5, putative, expressed	1	0	1
CSC1-like protein RXW8	1	0	0
CTP_transf_like domain-containing protein	1	0	0
CUE domain-containing protein	1	0	0
CULLIN_2 domain-containing protein	0	0	1
Cullin-associated NEDD8-dissociated protein 1	2	0	0
CW-type domain-containing protein	1	0	1
Cya0te hydratase	1	0	0
CYCLIN domain-containing protein	1	0	0
Cyclin N-termi0l domain-containing protein	2	0	1
Cyclin-dependent ki0se inhibitor	1	0	0
Cyclin-P3-1-like	0	0	1
Cysteine protease-like protein	0	1	0
Cysteine protei0se 1	0	1	0
Cysteine-rich receptor-like protein ki0se 10	1	0	0
Cysteine-rich receptor-like protein ki0se 25	1	0	0
Cysteine-rich receptor-like protein ki0se 26	1	0	0
Cysteine-rich repeat secretory protein 55	1	0	0
Cytochrome c domain-containing protein	3	0	0
Cytochrome P450	3	0	3
Cytochrome P450 family protein	2	0	1
Cytochrome P450 family protein, expressed	2	0	0
Cytochrome P450, putative	0	0	1
D0 (cytosine-5)-methyltransferase 1	1	0	0
D0 gyrase subunit B	0	0	1
D0 helicase INO80	1	0	0
D0 ligase	1	0	0
D0 mismatch repair protein	1	0	0
D0 mismatch repair protein MSH1, mitochondrial	1	0	0
D0 polymerase	3	0	0
D0 repair protein REV1	0	0	1
D0-damage-repair/toleration protein-like	0	1	0
D0-directed R0 polymerase subunit beta	1	0	0
D0-directed R0 polymerases II and IV subunit 5A	0	0	1
DA-3	1	0	0
dCTP pyrophosphatase 1	1	0	0
DDE Tnp4 domain-containing protein	1	1	1
DDT domain-containing protein	1	1	0
Dead box ATP-dependent R0 helicase, putative	0	0	1
DEAD-box ATP-dependent R0 helicase	2	0	0
DEAD-box ATP-dependent R0 helicase 35A	0	1	0
DEAD-box ATP-dependent R0 helicase 37	1	0	0
DEAD-box ATP-dependent R0 helicase 52A	1	0	2
DEAD-box ATP-dependent R0 helicase 56	1	0	0
Dehydroge0se/reductase	0	0	1
DEK_C domain-containing protein	1	0	0
Deoxyhypusine hydroxylase	0	1	0
Dephospho-CoA ki0se	1	0	0
D-glycerate dehydroge0se/hydroxypyruvate reductase	1	0	0
diacylglycerol ki0se	1	0	0
Dihydrolipoamide acetyltransferase component of pyruvate dehydroge0se complex	1	0	0
Dimer_Tnp_hAT domain-containing protein	1	0	1
Dirigent protein	1	0	0
Disease resistance protein	2	0	0
Disease resistance protein RPM1	5	0	1
Disease resistance protein RPP13	1	1	1
Disease resistance RPP13-like protein 4	1	0	0
DNMT1-RFD domain-containing protein	0	0	1
DUF1084 domain-containing protein	1	0	0
DUF1279 domain-containing protein	1	0	0
DUF1365 domain-containing protein	1	0	0
DUF1421 domain-containing protein	1	0	0
DUF1618 domain-containing protein	4	0	0
DUF1682 family protein	0	1	0
DUF2012 domain-containing protein	0	0	1
DUF2040 domain-containing protein	0	0	1
DUF218 domain-containing protein	0	1	0
DUF223 domain-containing protein	2	0	0
DUF295 domain-containing protein	6	0	1
DUF3128 domain-containing protein	1	0	0
DUF4220 domain-containing protein	4	0	1
DUF4228 domain-containing protein	0	0	1
DUF4283 domain-containing protein	2	0	2
DUF4477 domain-containing protein	1	0	0
DUF5311 domain-containing protein	1	0	0
DUF632 domain-containing protein	1	0	0
DUF632 domain-containing protein/DUF630 domain-containing protein	1	0	0
DUF674 family protein	1	0	0
DUF761 domain-containing protein	1	0	0
DUF862 domain-containing protein	0	1	1
DUF868 family protein	2	0	0
dy0min-like protein	1	0	0
E3 ubiquitin-protein ligase KEG	0	1	0
E3 ubiquitin-protein ligase XB3	0	0	1
EamA domain-containing protein	1	0	0
EF-hand domain-containing protein	1	0	2
EH domain-containing protein 1	1	0	0
ELMO domain-containing protein	0	1	0
Elongation factor Ts, mitochondrial	1	0	0
Elongator complex protein 4	0	1	0
embryo defective 1703	1	0	0
Endo/exonuclease/phosphatase domain-containing protein	2	0	0
Endogluca0se	0	0	1
Endoplasmic reticulum-Golgi intermediate compartment protein 3	0	0	1
Endoribonuclease Dicer	0	1	0
Ent-kaurene synthase	0	0	1
Epimerase domain-containing protein	0	0	3
Ethylene receptor	1	0	0
Eukaryotic initiation factor 4A	1	0	0
Eukaryotic porin/Tom40	1	0	0
Eukaryotic translation initiation factor 3 subunit B	1	0	1
Eukaryotic translation initiation factor 3A	1	0	0
Exocyst subunit Exo70 family protein	0	0	2
Exostosin domain-containing protein	0	0	1
FAD_binding_3 domain-containing protein	0	0	2
FAD_syn domain-containing protein	0	0	2
FAD-binding FR-type domain-containing protein	1	0	1
FAD-binding PCMH-type domain-containing protein	1	0	2
FAR1 domain-containing protein	2	0	0
Fatty acid desaturase	1	0	0
FBD domain-containing protein	1	0	1
F-box domain-containing protein	40	6	19
Fe2OG dioxyge0se domain-containing protein	4	2	1
Ferredoxin--0DP reductase, chloroplastic	0	1	0
Fertility-related ORF1 protein	1	0	0
Fe-S_biosyn domain-containing protein	1	0	0
Fes1 domain-containing protein	1	0	0
Fiber protein Fb34	1	0	0
Fibronectin type-III domain-containing protein	1	0	0
Filamentous hemagglutinin transporter	0	0	1
FK506-binding protein 2-1	1	0	0
FKS1_dom1 domain-containing protein	2	0	0
Flavanone 3-hydroxylase	1	0	0
Flavin-containing monooxyge0se	1	0	0
Flavodoxin-like domain-containing protein	0	1	0
Flavoki0se domain-containing protein	1	0	0
Flavonoid 3'-hydroxylase	2	0	0
FMN hydroxy acid dehydroge0se domain-containing protein	1	0	0
Formamidase	1	0	3
Formate dehydroge0se, mitochondrial	0	0	1
Formation of crista junctions protein 1	0	0	1
Formin-like protein	0	0	1
Formyl_trans_N domain-containing protein	1	0	1
Fructose-bisphosphate aldolase	1	0	0
FtsJ-like methyltransferase family protein	1	1	0
G domain-containing protein	1	0	0
Gag-pol polyprotein	1	0	0
Galactoside 2-alpha-L-fucosyltransferase	0	0	1
Gamma interferon inducible lysosomal thiol reductase family protein, expressed	1	0	0
Gamma-tubulin complex component	1	0	0
GATA transcription factor	0	0	1
GDT1 family protein	0	0	1
GeBP-type transcription factor	1	0	0
Germin-like protein	1	0	0
GFO_IDH_MocA domain-containing protein	0	1	0
GGACT domain-containing protein	1	0	0
GIDA_assoc domain-containing protein	0	0	1
Glucose-6-phosphate 1-dehydroge0se	1	0	0
Glucose-6-phosphate 1-epimerase	0	0	1
Glucosidase 2 subunit beta	0	0	1
Glutamate receptor	1	0	0
Glutamine amidotransferase type-2 domain-containing protein	1	0	0
Glutamyl-tR0(Gln) amidotransferase subunit A	0	0	1
Glutaredoxin domain-containing protein	0	0	1
Glutathione reductase	0	0	1
Glutathione S-transferase	2	1	1
Glutathione s-transferase, putative	1	0	0
Glyceraldehyde-3-phosphate dehydroge0se	3	0	0
Glycerol ki0se	1	0	0
Glycerol-3-phosphate acyltransferase	0	1	0
Glycine-rich cell wall structural protein 1.8-like	0	0	1
Glycine-rich protein A3	1	0	0
Glyco_hyd_65N_2 domain-containing protein	1	0	0
Glycos_transf_1 domain-containing protein	2	0	0
Glycosyl transferase	1	0	0
Glycosyltransferase	7	0	11
Glycylpeptide N-tetradecanoyltransferase	0	0	1
GOLD domain-containing protein	1	0	0
G-patch domain-containing protein	0	0	1
GRAM domain-containing protein	1	0	0
GRAS domain-containing protein	1	0	1
GSDH domain-containing protein	1	0	0
GST C-termi0l domain-containing protein	1	0	0
Haloacid dehaloge0se-like hydrolase domain-containing protein	1	0	0
Haloacid dehaloge0se-like hydrolase domain-containing protein Sgpp	1	0	0
HATPase_c domain-containing protein	1	0	0
HD domain-containing protein	2	0	0
HEAT repeat-containing protein	0	0	1
Heat shock 70 kDa protein, mitochondrial	1	0	0
Heat shock factor-binding protein 1	1	0	0
heat shock protein 70	0	1	0
Heat shock protein 70 kDa	0	1	0
HECT domain-containing protein	1	0	0
Helicase	0	0	1
Helicase-like transcription factor	1	0	0
Heme-binding-like protein chloroplastic	1	0	0
Heterogeneous nuclear ribonucleoprotein like	1	0	0
Hexosyltransferase	3	0	1
high chlorophyll fluorescence phenotype 173	1	0	0
Histidine ki0se	2	0	1
Histone deacetylase	1	0	0
Histone H2A	1	0	0
Histone H3	2	0	0
Histone-lysine N-methyltransferase 2B	0	0	1
Histone-lysine N-methyltransferase H3 lysine-9 specific SUVH5	1	0	0
Histone-lysine N-methyltransferase, H3 lysine-9 specific SUVH6	1	0	0
HMA domain-containing protein	3	1	0
HMG box domain-containing protein	0	0	1
Holliday junction ATP-dependent D0 helicase RuvA	0	1	0
Holocarboxylase synthetase	1	1	0
Homeobox domain-containing protein	1	1	0
Homeobox-leucine zipper protein	1	0	0
HR-like lesion-inducing protein-related	0	0	1
HTH TFE/IIEalpha-type domain-containing protein	1	0	0
HUN domain-containing protein	1	0	0
HXXXD-type acyl-transferase family protein	3	0	0
Hydrolase_4 domain-containing protein	0	0	2
IAA-amino acid hydrolase ILR1-like	1	0	0
Ig-like domain-containing protein	1	0	0
Inhibitor_I29 domain-containing protein	0	0	1
Inositol monophosphatase	1	0	0
Inositol-1,4,5-trisphosphate 5-phosphatase 4 isoform 1	0	0	2
Inositol-1-monophosphatase	0	1	0
Inositol-tetrakisphosphate 1-ki0se	0	0	1
Integrase catalytic domain-containing protein	1	0	1
Integrator complex subunit 7	0	0	1
Interferon-related developmental regulator family protein / IFRD protein family	1	0	0
IQ domain-containing protein IQM2-like	0	0	1
Iron sulfur cluster assembly protein 1, mitochondrial	0	0	1
Iron-sulfur cluster assembly protein	1	0	0
Isoaspartyl peptidase/L-asparagi0se	1	0	0
J domain-containing protein	2	0	2
Josephin domain-containing protein	1	0	0
Katanin p60 ATPase-containing subunit A1	0	1	0
Katanin p60 ATPase-containing subunit, putative	0	0	1
Kelch repeat-containing protein	0	0	1
Ki0se	2	0	0
Kinesin motor domain-containing protein	1	0	0
Kinetochore protein NDC80	0	1	0
kinetochore protein SPC24 homolog isoform X1	0	0	1
KIX_2 domain-containing protein	1	0	0
KxDL domain-containing protein	0	0	1
Kynurenine formamidase	0	0	1
Laccase	1	0	0
Lachrymatory-factor synthase-like	0	0	1
Lactamase_B domain-containing protein	0	0	1
La-related protein 7	0	0	1
L-aspartate oxidase	1	0	0
Leucine-rich receptor-like ki0se family protein	1	0	0
Leucine-rich repeat-like protein	1	0	0
Leucine--tRNA ligase	1	1	0
Leuk-A4-hydro_C domain-containing protein	0	0	1
Light-mediated development protein DET1	1	0	0
Lipase	1	0	0
Lipase_3 domain-containing protein	1	0	0
Lipase_GDSL domain-containing protein	2	0	1
Lipoyl synthase, mitochondrial	1	0	0
LOB domain-containing protein	0	0	1
Long-chain-alcohol oxidase	0	0	1
LRRNT_2 domain-containing protein	0	0	3
Lycopene beta/epsilon cyclase protein	1	0	0
Lysine-specific demethylase JMJ706	1	0	0
M20_dimer domain-containing protein	1	0	0
MAGE domain-containing protein	1	0	0
Malic enzyme	1	0	0
Malonyl-coenzyme A:anthocyanin 3-O-glucoside-6''-O-malonyltransferase	0	0	1
Maltase-glucoamylase, intesti0l protein	1	0	0
Mannose-6-phosphate isomerase	0	1	0
mater0l effect embryo arrest 18	0	0	1
MBOAT (membrane bound O-acyl transferase) family protein	0	0	1
Mediator of R0 polymerase II transcription subunit 21	0	0	1
Mei2-like protein	1	0	0
Metal tolerance protein C4	0	0	1
Metal transporter	2	0	0
Metalloendopeptidase	1	0	0
Methyltranfer_dom domain-containing protein	1	0	0
Methyltransf_11 domain-containing protein	2	0	0
Mevalo0te ki0se	1	0	0
MFS domain-containing protein	1	0	3
MHD domain-containing protein	0	0	1
Mitochondrial adenine nucleotide transporter ADNT1	0	1	0
Mitochondrial carrier protein	1	0	2
Mitochondrial fission 1 protein	0	0	1
Mitochondrial glycoprotein	0	0	1
Mitochondrial import inner membrane translocase subunit tim16	0	0	1
Mitochondrial substrate carrier family protein	1	0	0
Mitochondrial transcription termination factor family protein	5	1	0
MoCF_biosynth domain-containing protein	1	0	0
Monocopper oxidase-like protein SKU5	0	0	1
MSP domain-containing protein	0	1	0
Multiple organellar R0 editing factor 8, chloroplastic/mitochondrial-like	0	1	0
Mur_ligase_M domain-containing protein	1	0	0
Myb_D0-bind_3 domain-containing protein	4	1	5
Myb-like domain-containing protein	0	0	1
MYND-type domain-containing protein	1	0	0
Myosin	0	0	1
Myosin heavy chain-related	1	0	0
Myosin-2 heavy chain	1	0	0
NA(+)-translocating NADH-quinone reductasesubunit F	1	0	0
NAC domain-containing protein	2	0	3
NAD(P)-bd_dom domain-containing protein	1	71	2
NAD(P)H-quinone oxidoreductase subunit N	0	0	1
NADH dehydrogeNAse [ubiquinone] iron-sulfur protein 6, mitochondrial	1	0	0
NADPH--cytochrome P450 reductase	0	0	1
NADPH-dependent diflavin oxidoreductase 1	1	0	0
NAM-associated domain-containing protein	2	0	0
NB-ARC domain disease resistance protein	1	0	0
NB-ARC domain-containing disease resistance protein	1	0	1
NB-ARC domain-containing protein	20	1	7
Negative regulator of systemic acquired resistance (SNI1)	1	0	0
Nitrogen regulatory protein P-II-like protein	0	0	1
Nod-factor receptor 5	0	0	1
Nodulin-like domain-containing protein	1	0	0
Non-specific serine/threonine protein ki0se	3	0	1
NPH3 domain-containing protein	1	0	0
NTP_transf_2 domain-containing protein	0	0	1
Nuclear pore complex protein GP210	0	1	0
Nudix hydrolase domain-containing protein	1	0	0
OCRE domain-containing protein	1	0	0
Oligopeptide transporter	0	0	1
Origin of replication complex subunit 4	1	0	0
Os02g0478550-like protein	0	0	1
Outer mitochondrial membrane protein porin	1	0	0
Oxidored_FMN domain-containing protein	0	0	2
Oxygen-evolving enhancer protein 2	1	0	0
Oxysterol-binding protein-like	1	0	0
p0028E10.10 protein	0	0	1
PALP domain-containing protein	1	0	0
Pantothe0te ki0se 2	1	0	0
PAP_fibrillin domain-containing protein	1	1	0
Pathogenesis-related thaumatin-like protein	1	0	0
PB1 domain-containing protein	0	0	2
PBPe domain-containing protein	1	0	0
PDZ domain-containing protein	5	0	1
PDZ_6 domain-containing protein	0	0	1
Pectin acetylesterase	1	1	0
Pectin lyase-like superfamily protein	0	1	0
Pectinesterase	1	0	1
Pentatricopeptide repeat	0	0	1
Pentatricopeptide repeat protein	1	0	0
Pentatricopeptide repeat-containing protein	10	1	1
Pentatricopeptide repeat-containing protein mitochondrial	1	0	0
Peptidase A1 domain-containing protein	4	1	1
Peptidase S59 domain-containing protein	1	0	0
Peptidase_M48 domain-containing protein	0	1	0
Peptidyl-prolyl cis-trans isomerase	1	0	0
Peptidyl-prolyl cis-trans isomerase, putative	0	1	0
Peptidylprolyl isomerase	1	0	0
Peptidyl-tR0 hydrolase 2	0	0	1
Periaxin	0	0	1
Peroxidase	5	0	0
Peroxiredoxin Q	1	0	0
Pex14_N domain-containing protein	0	1	0
PH domain-containing protein	1	0	0
PHB domain-containing protein	1	0	1
PHD domain-containing protein	1	0	1
PHD-type domain-containing protein	0	3	1
Phos_pyr_kin domain-containing protein	0	0	1
Phosphate carrier protein, mitochondrial	1	0	0
Phosphatidate cytidylyltransferase	1	0	0
Phosphatidylinositol 4-phosphate 5-ki0se	1	0	0
Phosphoenolpyruvate carboxylase	0	1	1
Phosphoglycerate mutase family protein	1	0	0
Phospholipid-transporting ATPase	2	0	0
Phosphomannomutase/phosphoglucomutase	0	1	0
Photosystem I reaction center subunit III, chloroplastic	1	1	0
Photosystem I reaction center subunit V, chloroplastic	1	0	0
Photosystem I subunit II	1	0	0
Photosystem I subunit O	1	0	0
Photosystem II 10 kDa polypeptide	1	0	0
Photosystem II core complex proteins psbY, chloroplastic	1	0	0
Photosystem II reaction center W protein, chloroplastic	1	0	0
PHP	1	0	0
Phytanoyl-CoA dioxyge0se	0	0	1
Phytocyanin domain-containing protein	0	1	0
Phytoene desaturase	1	1	0
PI31_Prot_N domain-containing protein	0	1	0
PISTILLATA-like MADS-box transcription factor	1	0	0
PKS_ER domain-containing protein	0	0	1
PLAC8 family protein	1	0	0
Plant protein 1589 of unknown function	1	0	0
Plasma membrane ATPase	0	0	1
P-loop containing nucleoside triphosphate hydrolases superfamily protein	0	1	0
PlsC domain-containing protein	1	0	0
Plus3 domain-containing protein	0	0	3
PMD domain-containing protein	2	0	1
PMEI domain-containing protein	1	1	0
PMR5N domain-containing protein	2	1	0
Pollen-specific protein SF21-like	1	0	0
POLLUX-like ion channel	1	0	0
Poly(A) polymerase I	1	0	0
PolyA_pol domain-containing protein	1	0	0
Polyadenylate-binding protein	0	1	0
Polyadenylate-binding protein 2	1	0	0
Polyamine-modulated factor 1/Kinetochore protein NNF1	1	0	0
Polygalacturo0se inhibitor	1	0	0
Polyprotein	1	0	0
Polyubiquitin	4	0	0
Porin QuiX like	0	0	1
Potassium voltage-gated channel subfamily H member 3 like	0	1	0
PP2A regulatory subunit TAP46	1	0	0
PPM-type phosphatase domain-containing protein	1	0	1
PPR_long domain-containing protein	1	0	0
Pre-mR0-processing protein 40A	1	0	0
Pre-mR0-splicing factor 38B	1	0	0
Programmed cell death protein 4	1	0	0
Proteasome assembly chaperone 2	0	1	0
Proteasome subunit alpha type	1	0	0
Proteasome subunit beta	1	0	1
Protein ABIL1	1	0	0
Protein CHUP1, chloroplastic	1	0	1
Protein COFACTOR ASSEMBLY OF COMPLEX C SUBUNIT B CCB2, chloroplastic	1	0	0
Protein COFACTOR ASSEMBLY OF COMPLEX C SUBUNIT B CCB4, chloroplastic	1	0	0
Protein CONSERVED IN THE GREEN LINEAGE AND DIATOMS 27, chloroplastic	0	0	1
Protein DETOXIFICATION	5	0	2
Protein DGS1, mitochondrial	1	0	0
Protein DJ-1 B	0	0	1
Protein ECERIFERUM 1	1	0	0
Protein ENHANCED DISEASE RESISTANCE 2	0	0	1
Protein FAR1-RELATED SEQUENCE 5	0	0	1
Protein farnesyltransferase/geranylgeranyltransferase type-1 subunit alpha	1	0	0
Protein FATTY ACID EXPORT like	1	0	0
Protein FLX-like 1	1	0	0
Protein GAMETE EXPRESSED 1-like	1	0	0
Protein HESO1-like	1	0	0
Protein Iojap-related, mitochondrial	1	0	0
Protein JASON	1	0	0
Protein ki0se	2	0	2
Protein ki0se domain-containing protein	53	1	6
Protein ki0se, putative	0	0	1
Protein KTI12 homolog	1	0	0
Protein LURP-one-related 8	1	0	0
Protein MAINTE0NCE OF PSII UNDER HIGH LIGHT 1	0	0	2
Protein MAK16 homolog	0	0	1
Protein NDH-DEPENDENT CYCLIC ELECTRON FLOW 5	1	0	1
Protein NEOXANTHIN-DEFICIENT 1	1	0	0
Protein NRT1/ PTR FAMILY 3.1	1	0	1
Protein NRT1/ PTR FAMILY 4.3	0	0	1
Protein NRT1/ PTR FAMILY 4.3-like	0	0	1
Protein NRT1/ PTR FAMILY 6.3	1	0	0
Protein NRT1/ PTR FAMILY 8.1	0	0	1
Protein of unknown function, DUF538	1	0	0
Protein POLYCHOME-like	0	0	1
Protein root UVB sensitive 5	0	2	0
Protein SHOOT GRAVITROPISM 6	0	0	1
Protein SIP5-like	0	0	1
Protein SUPPRESSOR OF PHYA-105 1	1	0	0
Protein translocase subunit	0	1	0
Protein TRIGALACTOSYLDIACYLGLYCEROL 4, chloroplastic	0	0	1
Protein-serine/threonine ki0se	1	0	0
Protein-tyrosine phosphatase containing protein, expressed	0	1	0
PsbP domain-containing protein	1	0	1
Pseudouridine synthase family protein	1	0	0
Purple acid phosphatase	0	0	1
Pyruvate, phosphate diki0se regulatory protein, chloroplastic	1	0	0
QWRF motif-containing protein 7	1	0	0
Rab-GAP TBC domain-containing protein	0	0	2
Ras-related protein	0	1	0
Ras-related protein like	1	0	2
RBR-type E3 ubiquitin transferase	2	0	0
Receptor-like serine/threonine-protein ki0se	7	1	1
Red chlorophyll catabolite reductase	0	0	1
Regulator of rD0 transcription protein	1	0	0
Regulator of Vps4 activity in the MVB pathway protein	1	0	0
Remorin	1	0	0
Rep_fac-A_C domain-containing protein	1	0	0
Respiratory burst oxidase	0	0	1
Reticulon-like protein	1	0	1
Retinoic acid-induced 3	1	0	0
Retrotrans_gag domain-containing protein	5	1	0
Retrotransposon protein, putative, Ty1-copia subclass	1	0	0
Retrotransposon protein, putative, Ty3-gypsy subclass	1	0	0
Retrotransposon protein, putative, unclassified	1	0	0
Retrovirus-related Pol polyprotein from transposon TNT 1-94	7	0	2
Retrovirus-related Pol polyprotein LINE-1	1	0	0
Reverse transcriptase domain-containing protein	26	2	4
Reverse transcriptase Ty1/copia-type domain-containing protein	2	0	1
Rhamnogalacturo0te lyase	1	0	0
Rho GTPase activation protein (RhoGAP) with PHdomain	1	0	0
Rho GTPase-activating protein 24	1	0	0
Rhodanese domain-containing protein	1	0	0
Rhomboid domain-containing protein	2	0	0
RHOMBOID-like protein	1	0	0
Ribonuclease	0	3	0
Ribonuclease 2	1	0	0
Ribosomal protein L53	0	1	0
Ribosomal protein S21 family protein	1	0	0
Ribosomal R0 small subunit methyltransferase H	1	0	0
Ribosomal_S10 domain-containing protein	1	0	0
Ribosome maturation factor	0	0	1
Ribulose bisphosphate carboxylase small chain	1	0	0
Ribulose-phosphate 3-epimerase	1	0	0
Ricin B-type lectin domain-containing protein	1	0	0
RING-CH-type domain-containing protein	1	0	1
RING-type domain-containing protein	9	1	3
RING-type E3 ubiquitin transferase	0	0	1
RNA/RNP complex-1-interacting phosphatase, putative	1	0	0
RNA-binding (RRM/RBD/RNP motifs) family protein	0	2	0
RNA-binding protein 25	1	0	0
RNA-dependent RNA polymerase	2	0	0
RNAse H domain-containing protein	3	0	1
RNAse H-like protein	1	0	0
RNAse III domain-containing protein	1	0	0
Rop guanine nucleotide exchange factor 14	0	0	1
RPA-interacting protein A	1	0	0
RPOLA_N domain-containing protein	1	0	0
Rpr4901.2	1	0	0
rR0 N-glycosidase	1	0	0
RRM domain-containing protein	3	0	0
Rx_N domain-containing protein	1	0	2
S0C domain-containing protein	1	0	0
S1 motif domain-containing protein	1	0	0
S4 R0-binding domain-containing protein	2	0	0
S5 DRBM domain-containing protein	0	0	1
S-acyltransferase	1	1	0
S-adenosylmethionine decarboxylase proenzyme	0	0	2
S-adenosylmethionine decarboxylase uORF	0	0	1
SAM-dependent MTase DRM-type domain-containing protein	0	0	1
SANT domain-containing protein	1	0	1
SAP domain-containing protein	1	0	0
SATase_N domain-containing protein	1	0	0
SelT-like protein	1	0	0
Senescence-specific cysteine protease SAG39	1	0	0
Sequence-specific D0 binding transcription factor	1	0	0
Serine carboxypeptidase	0	0	1
Serine protease SPPA, chloroplastic	1	0	0
Serine/threonine-protein ki0se	1	0	0
SET domain-containing protein	0	0	1
SGF29 C-termi0l domain-containing protein	0	0	1
SGL domain-containing protein	0	1	0
SH3 domain-containing protein C23A1.17-like	1	0	0
Shikimate ki0se, chloroplastic	0	1	0
Shikimate O-hydroxycin0moyltransferase	1	0	0
Short-chain type dehydroge0se/reductase	0	0	1
SIAH-type domain-containing protein	2	0	0
Sialyltransferase-like protein 2	0	1	0
Signal peptidase complex subunit 3	0	0	1
Sister chromatid cohesion 1 protein 4	1	0	0
Sister chromatid cohesion protein PDS5-like protein B	0	0	1
Skp1 domain-containing protein	4	0	0
SKP1-like protein 4	1	0	0
SLH domain-containing protein	1	0	0
Sm domain-containing protein	1	0	0
SMP-LTD domain-containing protein	0	1	0
Smr domain-containing protein	1	0	0
SNF1-related protein ki0se regulatory subunit gamma 1	1	0	0
Sod_Cu domain-containing protein	1	0	0
Soluble diacylglycerol acyltransferase	0	0	1
Soluble inorganic pyrophosphatase	0	0	1
Solute carrier family 35, member F1	1	0	0
Splicing factor U2af small subunit B	1	0	0
SP-RING-type domain-containing protein	1	0	0
STAS domain-containing protein	0	1	0
Stromal cell-derived factor 2-like protein	1	0	0
Structural constituent of ribosome	1	0	0
Subtilisin-like protease	4	0	3
Succi0te dehydroge0se assembly factor 2, mitochondrial	0	1	0
Succi0te dehydroge0se subunit 6, mitochondrial	1	0	0
Sulfotransferase	1	0	0
Superoxide dismutase [Cu-Zn]	1	0	0
Suppressor of mec-8 and unc-52 protein-like protein 2	0	0	1
SWIM-type domain-containing protein	8	1	3
TAFII28 domain-containing protein	0	1	0
T-complex protein 1 subunit epsilon	0	0	2
TCP domain-containing protein	1	0	0
Telomerase reverse transcriptase	1	0	0
Tetratricopeptide repeat-containing domain	1	0	0
TF-B3 domain-containing protein	5	0	1
TFIID_20kDa domain-containing protein	0	1	0
TFIIS N-termi0l domain-containing protein	1	0	0
Thaumatin-like protein	1	0	0
Thioredoxin	1	0	0
Thioredoxin domain-containing protein	2	0	0
Thioredoxin reductase	0	0	1
Thioredoxin-like protein AAED1, chloroplastic	0	0	1
Thylakoid lume0l 17.4 kDa protein chloroplastic	1	0	0
Thylakoid lume0l 17.9 kDa protein, chloroplastic	0	0	1
Tify domain-containing protein	0	0	1
TIP120 domain-containing protein	2	0	0
TIP41-like protein	1	0	0
TPR_REGION domain-containing protein	1	0	1
TPT domain-containing protein	0	2	0
TPX2 (Targeting protein for Xklp2) protein family	1	0	0
TPX2 domain-containing protein	1	0	0
Transcription factor DIVARICATA	1	0	1
Transcription factor like	1	0	0
transcription factor SCREAM2-like	1	0	0
Transcription initiation factor IIA subunit 2	0	0	1
Transcription initiation factor IIF subunit beta	0	0	1
Transcription initiation factor TFIID subunit 9	1	0	0
Transcription termi0tion factor MTEF18, mitochondrial	1	0	0
Transferring glycosyl group transferase	1	0	0
Translation factor GUF1 homolog, mitochondrial	1	0	0
Translation initiation factor IF-2	0	1	0
Transmembrane 9 superfamily member	1	0	0
Transmembrane and coiled-coil domain-containing protein 4	0	0	1
Transmembrane protein, putative	0	0	1
Transpos_assoc domain-containing protein	1	0	0
Transposase-associated domain protein	0	1	1
Transposon protein, putative, CACTA, En/Spm sub-class, expressed	3	0	0
Transposon protein, putative, Mariner sub-class	0	0	1
Trehalose 6-phosphate phosphatase	1	0	0
Trihelix transcription factor	0	0	1
Tripeptidyl-peptidase 2	0	0	1
tRNA (Cytosine-5-)-methyltransferase	0	0	1
tRNA (guanine(26)-N(2))-dimethyltransferase	0	0	1
tRNA dimethylallyltransferase	1	0	0
tRNA_edit domain-containing protein	1	0	0
tRNA-pseudouridine synthase, putative	0	0	1
tRNA-synt_1g domain-containing protein	1	0	0
Tr-type G domain-containing protein	2	0	0
Tryptophan synthase alpha chain	0	1	0
t-SNARE coiled-coil homology domain-containing protein	2	1	0
TTF-type domain-containing protein	4	0	2
Tubulin beta chain	0	0	1
Two-component response regulator	1	0	0
Two-component response regulator-like PRR1	1	0	0
Ty3/gypsy retrotransposon protein	7	0	2
Type 2 D0 topoisomerase 6 subunit A	0	1	0
U2 snRNP auxiliary factor large subunit	3	0	0
UBD domain-containing protein	0	0	1
Ubiquitin carboxyl-termi0l hydrolase	1	0	0
UBIQUITIN_CONJUGAT_2 domain-containing protein	0	1	0
Ubiquitin-conjugating enzyme E2 variant	1	0	0
Ubiquitin-like domain-containing protein	2	0	0
Ubiquitin-like protein ATG12	0	1	0
Ubiquitinyl hydrolase 1	2	0	1
U-box domain-containing protein 62	1	0	0
UBX domain-containing protein	1	0	0
UDP-glucose 4-epimerase	2	0	0
UDP-glycosyltransferase	0	0	1
UDP-N-acetylglucosamine--dolichyl-phosphate N-acetylglucosaminephosphotransferase	1	0	0
ULP_PROTEASE domain-containing protein	6	1	5
Ultraviolet-B receptor UVR8	1	0	0
UNC93-like protein 1	0	0	1
Unknown protein	453	1	178
UPF0061 protein azo1574	1	0	0
UPF0426 protein chloroplastic	0	49	0
Upstream activation factor subunit spp27	0	0	1
Urb2 domain-containing protein	1	0	0
Ureide permease	1	0	0
Uridine ki0se	0	0	1
USP domain-containing protein	0	0	1
Vacuolar proton pump subunit B	1	0	0
Very-long-chain (3R)-3-hydroxyacyl-CoA dehydratase	0	0	2
Very-long-chain 3-oxoacyl-CoA reductase 1-like	0	0	1
Vesicle-associated membrane protein	1	0	0
VHS domain-containing protein	1	0	0
VPS9 domain-containing protein	1	0	0
V-type proton ATPase subunit a	1	0	0
V-type proton ATPase subunit G	0	1	0
W2 domain-containing protein	0	1	0
WAT1-related protein	2	0	0
WD_REPEATS_REGION domain-containing protein	2	1	3
WRKY domain-containing protein	2	0	0
Xaa-Pro aminopeptidase	0	0	1
XH domain-containing protein	1	0	1
Xpo1 domain-containing protein	1	0	0
YGL010w-like protein	0	0	1
Zeaxanthin epoxidase, chloroplastic	0	0	3
zf-LSD1 domain-containing protein	1	0	0
zf-RVT domain-containing protein	7	0	1
zf-XS domain-containing protein	1	0	0
Zinc finger CCCH domain-containing protein 14	0	3	0
Zinc finger CCCH domain-containing protein 16	1	0	0
Zinc finger MYND domain protein	1	0	0
Zinc finger protein GIS2	1	0	0
zinc_ribbon_10 domain-containing protein	0	0	1
Zn-dependent aspartyl aminopeptidase	0	0	1
ZnMc domain-containing protein	2	0	0

## Sheet: Table S7
Table S7. Unigenes annotated to the enriched GO terms of the HUB genes associated to the turquoise, pink and blue modules determined by the WGCNA analysis. HUB genes showed a gene significance > 0.2 and Module membership >0.8.
HS: sensitive population, NTSR3: derived from HS and selected for resistance to fenoxaprop-P-ethyl, NTSR2: derived from HS and selected for resistance to pendimethalin.
NA=non applicable
ID	log2FoldChange NTSR3 vs HS	padj NTSR3 vs HS	log2FoldChange NTSR2 vs HS	padj NTSR2 vs HS	Blast.Hit.Accession	AHRD.Quality.Code	Human.Readable.Description	Interpro.ID..Description.	Gene Significance WGCNA analysis	Module Membership	Enriched GO term	Module
TRINITY_DN12678_c0_g1	0.956771	1	-0.419267	1	tr|B6T6R3|B6T6R3_MAIZE	***	Calcium ion binding protein	IPR011992 (EF-hand domain pair)	0.855212	0.848646	calcium ion binding (GO:0005509)	blueHUB
TRINITY_DN2839_c0_g1	0.774869	1	-0.0691089	1	tr|A0A287W6V1|A0A287W6V1_HORVV	***	EF-hand domain-containing protein	IPR007736 (Caleosin-related)	0.832349	0.824459	calcium ion binding (GO:0005509)	blueHUB
TRINITY_DN11773_c1_g1	2.13447	1	-1.31965	1	tr|A0A287W6V1|A0A287W6V1_HORVV	***	EF-hand domain-containing protein	IPR007736 (Caleosin-related), IPR011992 (EF-hand domain pair)	0.856345	0.895383	calcium ion binding (GO:0005509)	blueHUB
TRINITY_DN20408_c0_g1	0.727719	1	-0.642834	1	tr|A0A2P5CX82|A0A2P5CX82_TREOI	*-*	Mitochondrial glycoprotein	IPR003428 (Mitochondrial glycoprotein)	0.728583	0.812644	mitochondrial matrix (GO:0005759)	blueHUB
TRINITY_DN164_c0_g1	0.180363	1	-0.452721	1	tr|M7YYS2|M7YYS2_TRIUA	***	Sister chromatid cohesion protein PDS5-like protein B	IPR016024 (Armadillo-type fold)	0.665683	0.801593	organelle organization (GO:0006996)	blueHUB
TRINITY_DN285_c0_g1	0.594608	1	-0.101585	1	tr|M0Y4E6|M0Y4E6_HORVV	*-*	zinc_ribbon_10 domain-containing protein	IPR019273 (Lunapark domain)	0.740858	0.807662	organelle organization (GO:0006996)	blueHUB
TRINITY_DN164_c0_g1	0.180363	1	-0.452721	1	tr|M7YYS2|M7YYS2_TRIUA	***	Sister chromatid cohesion protein PDS5-like protein B	IPR016024 (Armadillo-type fold)	0.665683	0.801593	mitotic sister chromatid cohesion (GO:0007064)	blueHUB
TRINITY_DN159_c1_g1	-0.222145	1	2.84305	1.87e-13	tr|R7WE26|R7WE26_AEGTA	*-*	Formamidase	IPR004304 (Acetamidase/Formamidase)	0.947855	0.94959	hydrolase activity, acting on carbon-nitrogen (but not peptide) bonds, in linear amides (GO:0016811)	blueHUB
TRINITY_DN159_c1_g3	-0.345375	1	2.66056	9.56e-13	tr|R7WAJ3|R7WAJ3_AEGTA	***	Formamidase	IPR004304 (Acetamidase/Formamidase)	0.939947	0.94311	hydrolase activity, acting on carbon-nitrogen (but not peptide) bonds, in linear amides (GO:0016811)	blueHUB
TRINITY_DN22012_c0_g1	-0.522872	1	2.38991	0.225283	tr|A0A2I0WHA0|A0A2I0WHA0_9ASPA	*-*	Formamidase	IPR004304 (Acetamidase/Formamidase)	0.862308	0.885748	hydrolase activity, acting on carbon-nitrogen (but not peptide) bonds, in linear amides (GO:0016811)	blueHUB
TRINITY_DN6767_c0_g1	0.547732	1	-0.377117	1	tr|A0A0E0FBF3|A0A0E0FBF3_9ORYZ	***	SGF29 C-terminal domain-containing protein	NA	0.860658	0.916665	SAGA-type complex (GO:0070461)	blueHUB
TRINITY_DN4263_c0_g1	-1.12983	1	0.0538929	1	tr|A0A1D1ZG57|A0A1D1ZG57_9ARAE	***	Holliday junction ATP-dependent DNA helicase RuvA	NA	-0.870487	0.897145	helicase activity (GO:0004386)	pinkHUB
TRINITY_DN2458_c0_g1	-0.44356	1	-0.00202304	1	tr|Q10J31|Q10J31_ORYSJ	***	Calmodulin-binding protein, putative, expressed	IPR012416 (CALMODULIN-BINDING PROTEIN60)	-0.629974	0.808073	calmodulin binding (GO:0005516)	pinkHUB
TRINITY_DN25476_c0_g2	3.01808	0.00685648	-0.827768	1	tr|A0A287UIP9|A0A287UIP9_HORVV	*-*	HD domain-containing protein	NA	0.830632	0.835651	guanosine tetraphosphate metabolic process (GO:0015969)	turquoiseHUB
TRINITY_DN15390_c0_g2	3.69257	0.0114158	-1.32227	1	tr|A0A0D9XE63|A0A0D9XE63_9ORYZ	*-*	HD domain-containing protein	NA	0.941229	0.953891	guanosine tetraphosphate metabolic process (GO:0015969)	turquoiseHUB
TRINITY_DN14884_c0_g1	7.9441	6.77e-09	0	1	tr|Q2QRF2|Q2QRF2_ORYSJ	*-*	Transposon protein, putative, CACTA, En/Spm sub-class, expressed	NA	0.93111	0.938577	transposition (GO:0032196)	turquoiseHUB
TRINITY_DN1087_c0_g2	2.3463	0.176501	0.935267	1	tr|Q2QRF2|Q2QRF2_ORYSJ	*-*	Transposon protein, putative, CACTA, En/Spm sub-class, expressed	NA	0.850462	0.859052	transposition (GO:0032196)	turquoiseHUB
TRINITY_DN852_c1_g1	1.65157	1	-0.0312649	1	tr|A0A291B5C4|A0A291B5C4_TRITD	***	CNL1	IPR002182 (NB-ARC), IPR011009 (Protein kinase-like domain), IPR027417 (P-loop containing nucleoside triphosphate hydrolase)	0.852849	0.852373	ADP binding (GO:0043531)	turquoiseHUB
TRINITY_DN24354_c0_g1	2.29269	0.490113	-0.406704	1	tr|A0A1R3GC16|A0A1R3GC16_COCAP	*-*	Disease resistance protein	IPR002182 (NB-ARC), IPR027417 (P-loop containing nucleoside triphosphate hydrolase)	0.858385	0.857853	ADP binding (GO:0043531)	turquoiseHUB
TRINITY_DN16171_c0_g1	2.40851	0.00120226	-0.100823	1	tr|A0A059Q2R4|A0A059Q2R4_9POAL	***	Disease resistance protein	IPR002182 (NB-ARC), IPR027417 (P-loop containing nucleoside triphosphate hydrolase), IPR032675 (Leucine-rich repeat domain, L domain-like)	0.97897	0.975341	ADP binding (GO:0043531)	turquoiseHUB
TRINITY_DN8741_c0_g1	1.01667	1	0.157392	1	tr|M8BUW2|M8BUW2_AEGTA	*-*	Disease resistance protein RPM1	IPR002182 (NB-ARC), IPR027417 (P-loop containing nucleoside triphosphate hydrolase)	0.822716	0.826764	ADP binding (GO:0043531)	turquoiseHUB
TRINITY_DN30176_c0_g1	2.09338	1	-0.501637	1	tr|N1R489|N1R489_AEGTA	*-*	Disease resistance protein RPM1	NA	0.862462	0.877378	ADP binding (GO:0043531)	turquoiseHUB
TRINITY_DN137_c0_g1	0.720139	1	0.29609	1	tr|M8B3F4|M8B3F4_TRIUA	*-*	Disease resistance protein RPM1	IPR002182 (NB-ARC), IPR027417 (P-loop containing nucleoside triphosphate hydrolase)	0.894032	0.896341	ADP binding (GO:0043531)	turquoiseHUB
TRINITY_DN13432_c0_g2	2.41282	0.187583	1.21821	1	tr|R7W6C6|R7W6C6_AEGTA	*-*	Disease resistance protein RPM1	IPR002182 (NB-ARC), IPR027417 (P-loop containing nucleoside triphosphate hydrolase)	0.77027	0.800425	ADP binding (GO:0043531)	turquoiseHUB
TRINITY_DN1072_c3_g1	1.80756	0.0692179	0.193393	1	tr|M8C7F9|M8C7F9_AEGTA	*-*	Disease resistance protein RPM1	IPR032675 (Leucine-rich repeat domain, L domain-like)	0.945153	0.935354	ADP binding (GO:0043531)	turquoiseHUB
TRINITY_DN138751_c0_g1	3.53782	0.113116	0.37354	1	tr|M8AGI7|M8AGI7_TRIUA	*-*	Disease resistance protein RPP13	IPR002182 (NB-ARC), IPR027417 (P-loop containing nucleoside triphosphate hydrolase)	0.92239	0.907579	ADP binding (GO:0043531)	turquoiseHUB
TRINITY_DN19589_c0_g1	1.00205	1	0.0418829	1	tr|G7J1I4|G7J1I4_MEDTR	*-*	NB-ARC domain disease resistance protein	IPR032675 (Leucine-rich repeat domain, L domain-like)	0.803007	0.803921	ADP binding (GO:0043531)	turquoiseHUB
TRINITY_DN8907_c1_g1	1.43408	0.962789	0.22278	1	tr|T1LB20|T1LB20_TRIUA	***	NB-ARC domain-containing protein	IPR002182 (NB-ARC), IPR027417 (P-loop containing nucleoside triphosphate hydrolase)	0.930066	0.936011	ADP binding (GO:0043531)	turquoiseHUB
TRINITY_DN849_c0_g1	0.828486	1	-0.373204	1	tr|A0A287Q003|A0A287Q003_HORVV	***	NB-ARC domain-containing protein	IPR032675 (Leucine-rich repeat domain, L domain-like)	0.807414	0.810792	ADP binding (GO:0043531)	turquoiseHUB
TRINITY_DN72418_c0_g1	3.10385	0.00867113	0.912343	1	tr|A0A287Y104|A0A287Y104_HORVV	*-*	NB-ARC domain-containing protein	IPR002182 (NB-ARC), IPR032675 (Leucine-rich repeat domain, L domain-like)	0.911816	0.909202	ADP binding (GO:0043531)	turquoiseHUB
TRINITY_DN60329_c0_g1	1.91894	1	-3.05886	0.815137	tr|A0A287EGV5|A0A287EGV5_HORVV	***	NB-ARC domain-containing protein	IPR002182 (NB-ARC), IPR027417 (P-loop containing nucleoside triphosphate hydrolase), IPR032675 (Leucine-rich repeat domain, L domain-like)	0.868576	0.841393	ADP binding (GO:0043531)	turquoiseHUB
TRINITY_DN5497_c0_g1	1.02234	1	-0.0280523	1	tr|M0X4N3|M0X4N3_HORVV	*-*	NB-ARC domain-containing protein	IPR002182 (NB-ARC), IPR027417 (P-loop containing nucleoside triphosphate hydrolase)	0.855846	0.849878	ADP binding (GO:0043531)	turquoiseHUB
TRINITY_DN34216_c0_g1	2.03097	1	-3.35866	0.943939	tr|I1HN36|I1HN36_BRADI	*-*	NB-ARC domain-containing protein	IPR002182 (NB-ARC), IPR027417 (P-loop containing nucleoside triphosphate hydrolase)	0.920585	0.89824	ADP binding (GO:0043531)	turquoiseHUB
TRINITY_DN30222_c0_g1	7.95996	4.05e-06	5.79843	0.0163038	tr|A0A287E1Z7|A0A287E1Z7_HORVV	***	NB-ARC domain-containing protein	IPR002182 (NB-ARC), IPR027417 (P-loop containing nucleoside triphosphate hydrolase)	0.874992	0.874276	ADP binding (GO:0043531)	turquoiseHUB
TRINITY_DN22938_c0_g1	3.02402	0.169645	1.23571	1	tr|A0A287JTS0|A0A287JTS0_HORVV	*-*	NB-ARC domain-containing protein	IPR001611 (Leucine-rich repeat), IPR006553 (Leucine-rich repeat, cysteine-containing subtype), IPR032675 (Leucine-rich repeat domain, L domain-like)	0.861237	0.850349	ADP binding (GO:0043531)	turquoiseHUB
TRINITY_DN11455_c0_g1	2.26389	NA	-1.61825	NA	tr|A0A2K2CMC7|A0A2K2CMC7_BRADI	***	NB-ARC domain-containing protein	IPR002182 (NB-ARC), IPR027417 (P-loop containing nucleoside triphosphate hydrolase), IPR032675 (Leucine-rich repeat domain, L domain-like)	0.891211	0.886979	ADP binding (GO:0043531)	turquoiseHUB
TRINITY_DN13913_c0_g1	-9.22276	1.63e-15	0.234626	1	tr|A0A287VEC7|A0A287VEC7_HORVV	***	NB-ARC domain-containing protein	IPR002182 (NB-ARC), IPR027417 (P-loop containing nucleoside triphosphate hydrolase), IPR032675 (Leucine-rich repeat domain, L domain-like)	-0.956649	-0.949486	ADP binding (GO:0043531)	turquoiseHUB
TRINITY_DN13136_c1_g1	0.407982	1	-0.0198105	1	tr|A0A1D6MC44|A0A1D6MC44_MAIZE	***	ARM repeat superfamily protein	IPR016024 (Armadillo-type fold), IPR019538 (26S proteasome non-ATPase regulatory subunit 5)	0.892817	0.866137	protein-containing complex assembly (GO:0065003)	turquoiseHUB
TRINITY_DN44944_c0_g1	2.72609	0.135935	-1.04219	1	tr|A0A1E5V4H1|A0A1E5V4H1_9POAL	*-*	Cullin-associated NEDD8-dissociated protein 1	IPR016024 (Armadillo-type fold)	0.89346	0.899929	protein-containing complex assembly (GO:0065003)	turquoiseHUB
TRINITY_DN59677_c0_g1	2.1473	0.642536	-0.574505	1	tr|C0PJP0|C0PJP0_MAIZE	***	TIP120 domain-containing protein	IPR016024 (Armadillo-type fold)	0.848565	0.867088	protein-containing complex assembly (GO:0065003)	turquoiseHUB

## Sheet: TableS8
Table S8. Result of the KEGG enrichment of the HUB genes belonging to the turquoise, pink and blue modules determined by the WGCNA analysis.
NTSR3: derived from HS and selected for resistance to fenoxaprop-P-ethyl, NTSR2: derived from HS and selected for resistance to pendimethalin.
Module	ko ID	Pathway name	pvalue
Turquoise module (positive high correlation with NTSR3 phenotype)	ko00196	Photosynthesis - antenna proteins	0.00103013
	ko00944	Flavone and flavonol biosynthesis	0.00126507
	ko04392	Hippo signaling pathway - multiple species	0.00690205
	ko00195	Photosynthesis	0.0108315
	ko04710	Circadian rhythm	0.0115957
Pink module (positive high correlation with NTSR3 phenotype)	ko04146	Peroxisome	0.00920955
Blue module (positive high correlation with NTSR2 phenotype)	ko00460	Cyanoamino acid metabolism	0.00260202
	ko00930	Caprolactam degradation	0.00573363
	ko05222	Small cell lung cancer	0.0101199
	ko00906	Carotenoid biosynthesis	0.0107707

## Sheet: TableS9
Table S9. Result of the Geneinvestigator using the signature tool in order to compare the HUB genes (and log2 of the fold change) belonging to the turquoise, pink and blue modules determined by the WGCNA analysis against wheat, barley and rice databases. HUB genes showed a gene significance > 0.2 and Module membership >0.8. Only genes with a BLASTp E-value lower than 0.01 were considered. In addi…
HS: sensitive population, NTSR3: derived from HS and selected for resistance to fenoxaprop-P-ethyl, NTSR2: derived from HS and selected for resistance to pendimethalin.
Module	Number and percentage of orthologous found in wheat (E-value≤0.01)	Number and percentage of genes used in the signature tool of Geneinvestigator	Results of the Geneinvestigator and relative similarity	Number and percentage of orthologous found in barley (E-value≤0.01)	Number and percentage of genes used in the signature tool of Geneinvestigator	Orthologous found in rice (E-value≤0.01)	Number and percentage of orthologous found in maize (E-value≤0.01)	Number and percentage of genes used in the signature tool of Geneinvestigator	Number of genes used in the signature tool of Geneinvestigator
HUB genes in turquoise module (positive high correlation with NTSR3 phenotype)	818 (32.7%)	400 (16%)	TA-00094 CS-7EL/Chinese Spring (stimulus: Fusarium graminearum); 1.043	827 (33.0%)	400 (16%)	HV-00077 germination (6h; proximal aleurone)/ proximal aleurone samples from dry caryopsis (stimulus: germination); 1.071	697 (27.8%)	400 (16%)	ZM-00143 W64APbfRNAi;o2/W64A (stimulus:untreated endosperm samples); 1.061
			TA-00205 HC374/Shaw (stimulus: F. graminearum); 1.043			HV-00077 germination (6h; central aleurone)/ central aleurone samples from dry caryopsis (stimulus: germination); 1.070			ZM-00121 germination (24h) /germination (0h;dry seeds) (stimuluts:germination); 1.049
			TA-00173 2-2618/2-2890 (stimulus: F. graminearum), 1.040			HV-00073 osmotic, 26°C/ untreated microspore samples (stimulus:osmotic); 1.054			ZM-00143 W64Ao2/W64A (stimulus:untreated endosperm samples); 1.049
HUB genes in pink module (negative high correlation with NTSR3 phenotype)	134 (51.0%)	134 (51.0%)	TA-00131 Funneliformis mosseae; X. translucens (leaf) / F. mosseae (leaf) (stimulus: F.mosseae); 1.096	128 (48.7%)	128 (48.7%)	HV-00101 KD-CKX1 17.10/non-transgenic line (stimulus:spike development); 1.100	125 (47.5%)	125 (47.5%)	ZM-00159 leaf fractionation (BS-e; section 4)/ leaf fractionation (BS-e; section 5) (stimulus:leaf fractionation); 1.101
			TA-00131 F.mosseae; X. translucens (root) / F. mosseae (root) (stimulus: F.mosseae);1.091			HV-00070 WBDC 110/WBDC 259 (stimulus untreated samples); 1.099			ZM-00127 CO441/ CO354 (stimulus: Fusarium verticillioides); 1.100
			TA-00131 F.mosseae; X. translucens (leaf) / mock treated leaf samples (Chinese Spring) (stimulus: F.mosseae) ; 1.087			HV-00098 cold (-8°C; 18h). Untreated leaf samples (18h) (stimulus:cold -8°C); 1.097			ZM-00159 leaf fractionation (M-e; section 4)/ leaf fractionation (M-e; section 5) (stimulus:leaf fractionation); 1.100
HUB genes in blue module (positive high correlation with NTSR2 phenotype)	21 (2.1%)	22 (2.1%)	TA-00205 Wuhan 1/Shaw; 1.215	375 (35.6%)	375 (35.6%)	HV-00076 2Hb8 R NIL/M69 (stimulus: F. graminearum); 1.094	334 (31.7%)	334 (31.7%)	ZM-00053 submemergence (M162W;72h)/subemergence (M162W;24h) (stimulus:subemergence); 1.093
			TA-00095 cold (Manitou,;14d)/untreated leaf samples (Manitou) (stimulus:cold); 1.178			HV-00077 germination (6h; distal aleurone)/ distal aleurone samples from dry caryopsis; 1.086			ZM-00121 germination (24h) /germination (0h;dry seeds) (stimuluts:germination); 1.083
			TA-00200 Puccinia striiformis (8dpi, 15°C for 7 days)/ 15°C for 7 d (mock, 8dpi) (Stimulus: P.striiformis); 1.144			HV-00076 F. graminearum, (2Hb8 R NIL; 48hpi)/mock inoculated spike samples (2Hb R NIL; 48hpi); 1.083			ZM-00143 W64Ao2/W64A (stimulus:untreated endosperm samples); 1.082
